# Supplementary material
Source: publisher figshare collection journal article supplement (https://tandf.figshare.com/ndownloader/files/20121779)
Supplement: Supplementary file 1 [file 20121779]

# Supplemental material

## *One-step estimator paths for concave regularization*

### 7 Implementation via coordinate descent

We use Coordinate descent (CD; e.g., Luenberger and Ye, 2008) to minimize (3) at each step along the path. CD is a local optimization algorithm that cycles through minimization of the conditional objective for individual parameters when the remaining parameters are fixed. Algorithms of this type have become popular in  $\ell_1$  penalized estimation since the work by Friedman et al. (2007) and Wu and Lange (2008).

Our CD routine, outlined in Algorithm 1, is a solver for penalized weighted-least squares problems as defined in equation (21) below. This applies directly in Gaussian regression, and for non-Gaussian models we follow Friedman et al. (2010) and apply CD inside an outer loop of iteratively re-weighted-least-squares (IRLS; e.g., Green, 1984). Given current parameter values  $\hat{\beta}$ , the Newton-Raphson update for maximum likelihood estimation is  $\beta = \hat{\beta} - \mathbf{H}^{-1}\mathbf{g}$ , where  $\mathbf{H}$  is the information matrix with elements  $h_{jk} = \partial^2 l / \partial \beta_j \partial \beta_k |_{\hat{\beta}}$  and  $\mathbf{g}$  is coefficient gradient (see Appendix 8). For exponential family linear models we can write  $\mathbf{H} = \mathbf{X}'\mathbf{V}\mathbf{X}$  and  $\mathbf{g} = \mathbf{X}'\mathbf{V}(\mathbf{z} - \hat{\eta})$ , where  $\mathbf{V} = \text{diag}(\mathbf{v})$ ,  $\mathbf{v} = [v_1 \dots v_n]$  are ‘weights’,  $\mathbf{z} = [z_1 \dots z_n]$  are transformed ‘response’, and  $\hat{\eta}_i = \hat{\alpha} + \mathbf{x}_i'\hat{\beta}$ . In Gaussian regression,  $v_i = 1$ ,  $z_i = \hat{\eta}_i - y_i$ , and the update is an exact solution. For binomial regression,  $v_i = q_i(1 - q_i)$  and  $z_i = \hat{\eta}_i - (y_i - q_i)/v_i$ , where  $q_i = (1 + \exp[-\hat{\eta}_i])^{-1}$  is the estimated probability of success.

This yields  $\beta = (\mathbf{X}'\mathbf{V}\mathbf{X})^{-1}\mathbf{X}'\mathbf{V}\mathbf{z}$ , such that the Newton update solves a weighted-least-squares problem. Adding  $\ell_1$  costs, the minimization objective from (3) becomes

$$\underset{\alpha, \beta_1, \dots, \beta_p \in \mathbb{R}}{\text{argmin}} \sum_i \frac{v_i}{2} (\alpha + \mathbf{x}_i'\beta - z_i)^2 + n \sum_j \omega_j \lambda |\beta_j|. \quad (21)$$

Our solver iterates between CD on (21) and, for non-Gaussian models, updates to  $\mathbf{v}$  and  $\mathbf{z}$ . Each  $t^{\text{th}}$  segment IRLS routine initializes  $[\hat{\alpha}, \hat{\beta}]$  at solutions for  $\lambda^{t-1}$ , or at  $[\hat{\alpha}, \mathbf{0}]$  for  $t = 1$ . In the `gamlr` implementation, a full pass update of all parameters is done only at the first CD iteration; otherwise coordinates with currently inactive (zero)  $\hat{\beta}_j$  are not updated. Once the descent converges for this *active set*, IRLS  $\mathbf{v}$  and  $\mathbf{z}$  are updated and we begin a new CD loop

with a full pass update. The routine stops when maximum squared change in  $\beta_j$  scaled by its information over one of these full pass updates is less than some tolerance threshold, `thresh`. The default in `gamlr` uses a relative tolerance of  $10^{-7}$  times null model deviance.

---

**Algorithm 1** Coordinate descent

---

```

Set  $\mathbf{vh}_j = \sum_i v_i (x_{ij} - \bar{x}_j)^2$  and  $\mathbf{vx}_j = \sum_i v_i x_{ij}$  for  $j = 1 \dots p$ .
while  $\max_{j=1 \dots p} \mathbf{vh}_j \Delta_j^2 > \text{thresh}$ :
  for  $j=1 \dots p$ :
    set  $\mathbf{vg}_j = -\sum_i x_{ij} v_i (z_i - \hat{\eta}_i)$  and  $\mathbf{ghb} = \mathbf{vg}_j - \mathbf{vh}_j \hat{\beta}_j$ 
    if  $|\mathbf{ghb}| < n\lambda^t \omega_j^t$ :  $\Delta_j = -\hat{\beta}_j$ 
    else:  $\Delta_j = -(\mathbf{vg}_j - \text{sign}(\mathbf{ghb})n\lambda^t \omega_j^t) / \mathbf{vh}_j$ .
    update  $\hat{\beta}_j \pm \Delta_j$ ,  $\hat{\alpha} \pm -\mathbf{vx}_j \Delta_j$ , and  $\hat{\boldsymbol{\eta}} = \hat{\alpha} + \mathbf{X}'\hat{\boldsymbol{\beta}}$ .

```

---

For distributed data, see Liu et al. (2015) for a stochastic coordinate descent framework.

## 7.1 Descent convergence

Despite the non-differentiability of  $|\beta_j|$  at zero, Tseng (2001) establishes local convergence for CD on (21) as a consequence of penalty separability: the non-differentiable part of our objective is a sum of functions on only a single coordinate. Thus CD solves each weighted-least squares problem, and the full algorithm converges if IRLS does. For non-Gaussian models, convergence of such nested  $\ell_1$ -penalized IRLS algorithms is shown in Lee et al. (2014).

## 7.2 Quasi-Newton acceleration

Under high collinearity and large  $\gamma$ , one may wish to accelerate convergence via a quasi-Newton step (e.g., Lange, 2010). Acceleration is applied to  $\boldsymbol{\theta} = [\alpha, \boldsymbol{\beta}]$ , and a move is accepted only if it leads to a decrease in the objective. Suppose that  $\hat{\boldsymbol{\theta}}^{(0)}$ ,  $\hat{\boldsymbol{\theta}}^{(-1)}$ , and  $\hat{\boldsymbol{\theta}}^{(-2)}$  are the current, previous, and previous-to-previous parameter estimates. Write  $M(\hat{\boldsymbol{\theta}}^{(t)})$  as the implied CD update map  $\hat{\boldsymbol{\theta}}^{(t)} \rightarrow \hat{\boldsymbol{\theta}}^{(t+1)}$ , such that the algorithm converges at  $\hat{\boldsymbol{\theta}} - M(\hat{\boldsymbol{\theta}}) = \mathbf{0}$ . With  $\mathbf{u} = \hat{\boldsymbol{\theta}}^{(-1)} - \hat{\boldsymbol{\theta}}^{(-2)}$  and  $\mathbf{v} = \hat{\boldsymbol{\theta}}^{(0)} - \hat{\boldsymbol{\theta}}^{(-1)}$ , a secant approximation to the gradient of  $M$  is  $\partial M / \partial \hat{\boldsymbol{\theta}}_l \approx \mathbf{v}_l / \mathbf{u}_l$ . An approximate Newton-Raphson step to solve for the root of  $\hat{\boldsymbol{\theta}} - M(\hat{\boldsymbol{\theta}})$  updates each coordinate  $\hat{\theta}_l \leftarrow \hat{\theta}_l^{(-1)} - (\hat{\theta}_l^{(-1)} - \hat{\theta}_l^{(0)}) / (1 - \mathbf{v}_l / \mathbf{u}_l)$  which can be re-written as  $\hat{\theta}_l = (1 - w_l) \hat{\theta}_l^{(-1)} + w_l \hat{\theta}_l^{(0)}$  where  $w_l = \mathbf{u}_l / (\mathbf{u}_l - \mathbf{v}_l)$ .

## 8 Gradient, curvature, and path starts

The negative log likelihood objective in Gaussian regression is  $l(\alpha, \beta) = 0.5 \sum_i (y_i - \eta_i)^2$  with gradient  $g_j(\beta) = \partial l / \partial \beta_j = -\sum_i x_{ij}(y_i - \eta_i)$ , and coordinate curvature  $h_j(\beta) = \partial^2 l / \partial \beta_j^2 = \sum_i x_{ij}^2$ . In logistic regression, set  $y_i = 1$  for ‘success’ and  $y_i = 0$  for ‘failure’ and write  $q_i = (1 + \exp[-\eta_i])^{-1}$  as the probability of success. Then  $l(\alpha, \beta) = \sum_i -y_i \eta_i + \log(1 + \exp[\eta_i])$ ,  $g_j(\beta) = \partial l / \partial \beta_j = -\sum_i x_{ij}(y_i - q_i)$ , and  $h_j(\beta) = \partial^2 l / \partial \beta_j^2 = \sum_i x_{ij}^2 q_i(1 - q_i)$ . In each case, it is implied that  $\hat{\alpha}$  has been set to minimize  $l(\alpha, \hat{\beta})$ .

For  $\ell_1$  costs  $c_j(|\beta_j|) = |\beta_j|$ , the infimum  $\lambda$  such that  $\hat{\beta} = \mathbf{0}$  is available analytically as  $\lambda^1 = n^{-1} \max\{|g_j(\mathbf{0})|, j = 1 \dots p\}$ , the maximum mean absolute gradient for the null model with  $\hat{\beta} = \mathbf{0}$ . This formula is used to obtain our starting values for the path algorithms.

## 9 False Discovery Control

A common goal in high-dimensional estimation is support recovery – having the set  $\{j : \hat{\beta}_j \neq 0\} = \{j : \beta_j \neq 0\}$  for some ‘true’  $\beta$ . For standard lasso estimated  $\hat{\beta}$ , many authors have shown (e.g., Bühlmann and van de Geer, 2011; Zou, 2006) that to get exact support recovery asymptotically or with high probability requires an *irrepresentability condition* which limits the size of least-squares projections from ‘true support’ onto spurious covariates.

DEFINITION 9.1. *The  $(\theta, S, \mathbf{v})$ -irrepresentable condition for  $\theta \in [0, 1]$  and  $\mathbf{v} \in \mathbb{R}^s$  holds that,*

$$|\chi_j' \mathbf{X}_S (\mathbf{X}_S' \mathbf{X}_S)^{-1} \mathbf{v}| \leq \theta \quad \forall j \notin S \quad (22)$$

This is often presented with  $\mathbf{v} = \mathbf{1}$ .<sup>1</sup> It can be a strict design restriction; for example, Bühlmann and van de Geer (2011) show a single variable that is highly correlated with many columns of  $\mathbf{X}_S$  leading to failure. Much of the literature on concave penalization has focused on achieving support recovery *without* such conditions; see, e.g., Fan et al. (2014) for a recent overview. Our results will require irrepresentable conditions with  $\mathbf{v} = \omega_S$ , which becomes less restrictive as one is able to shrink weights  $\omega_j$  for  $j \in S$ . See the remarks for more discussion.

Our comparison of interest is between  $\hat{S} = \{j : \hat{\beta}_j \neq 0\}$ , for  $\hat{\beta}$  from weighted- $\ell_1$  penalized estimation, and  $S = \{j : \beta_j^\nu \neq 0\}$  for  $\beta^\nu$  the  $\ell_0$  penalized estimator from Theorem 3.1. Whether looking to an  $\ell_0$  oracle or a sparse truth, our experience is that exact support recovery does not occur in practice (e.g., see the simulation in Section 5). Thus, we instead focus on ability of the weighted-lasso to minimize *false discoveries*:  $\hat{\beta}_j \neq 0$  when  $\beta_j^\nu = 0$ .

<sup>1</sup>Wainwright (2009) shows that (22) with  $\theta = 1$ ,  $\mathbf{v} = \mathbf{1}$  is necessary for lasso sign recovery in the *noiseless* setting.

THEOREM 9.1. *Consider the setting of Theorem 3.1. If  $\omega_{S^c}^{\min} = 1$  and  $\lambda > \sqrt{2\nu}$  then*

$$\|\mathbf{X}'_{S^c}\mathbf{X}_S(\mathbf{X}'_S\mathbf{X}_S)^{-1}\boldsymbol{\omega}_S\|_\infty \leq 1 - \frac{\sqrt{2\nu}}{\lambda_t} \Rightarrow \hat{S} \cap S^c = \emptyset. \quad (23)$$

The result follows directly from the sign recovery lemma 9.1.

### Remarks

- From Theorem 7.4 in Bühlmann and van de Geer (2011), the irrepresentability condition holds with  $|\boldsymbol{\chi}'_j\mathbf{X}_S(\mathbf{X}'_S\mathbf{X}_S)^{-1}\boldsymbol{\omega}_S| \leq \frac{\|\boldsymbol{\omega}_S\|}{\sqrt{s}}\theta_{\text{adap}}(S)$  where  $\theta_{\text{adap}}(S)$  is their ‘adaptive restricted regression’ coefficient. Of interest here, they show that  $\theta_{\text{adap}}(S) \leq \sqrt{s}/\Lambda_{\min}(S)$  where  $\Lambda_{\min}(S)$  is the minimum eigenvalue of  $\mathbf{X}'_S\mathbf{X}_S/n$ . Thus, (i) can be replaced by the restriction  $\Lambda_{\min}(S) \geq \|\boldsymbol{\omega}_S\|(1 - \sqrt{2\nu}/(\omega_{S^c}^{\min}\lambda))^{-1} = \sqrt{s}L$ , with  $L$  from Theorem 3.1, and small values for  $L$  appear key in both predictive performance and support recovery.

- Without irrepresentability, limits on false discovery are more pessimistic. Convergence conditions imply that for  $j \in S^c \cap \hat{S}$  we have  $n\lambda\omega_j = |\boldsymbol{\chi}'_j(\mathbf{X}\hat{\boldsymbol{\beta}} - \mathbf{y})| \leq |\boldsymbol{\chi}'_j\mathbf{X}(\hat{\boldsymbol{\beta}} - \boldsymbol{\beta}^\nu)| + |\boldsymbol{\chi}'_j\mathbf{e}^S| \leq n(2\|\boldsymbol{\omega}_S\|/\phi(L, S) + \sqrt{2\nu}/\lambda) \forall j$ . Dividing by  $n\lambda\omega_j$  and counting yields

$$|S^c \cap \hat{S}| \leq \left| \frac{1}{\boldsymbol{\omega}_{S^c \cap \hat{S}}} \right| \left( \frac{2\|\boldsymbol{\omega}_S\|}{\phi(L, S)} + \frac{\sqrt{2\nu}}{\lambda} \right) \quad (24)$$

Without the ability to make  $\omega_j$  very big for  $j \in S^c$  (e.g., as in a thresholding procedure like that of Zhou 2009), the result in (24) has little to say about false discovery control.

## 9.1 Sign Recovery

LEMMA 9.1. *Under the setting of Theorem 3.1, with  $\hat{S} = \{j : \hat{\beta}_j \neq 0\}$ , if  $\omega_{S^c}^{\min}\lambda > \sqrt{2\nu}$  then*

$$|\boldsymbol{\chi}'_j\mathbf{X}_S(\mathbf{X}'_S\mathbf{X}_S)^{-1}\boldsymbol{\omega}_S| \leq 1 - \frac{\sqrt{2\nu}}{\lambda\omega_j} \forall j \in S^c \Rightarrow \hat{S} \cap S^c = \emptyset. \quad (25)$$

*If in addition  $|(\mathbf{X}'_S\mathbf{X}_S)^{-1}\mathbf{X}'_S\mathbf{y}|_\infty > n\lambda|(\mathbf{X}'_S\mathbf{X}_S)^{-1}\boldsymbol{\omega}_S|_\infty$ , then  $\text{sgn}(\hat{\boldsymbol{\beta}}) = \text{sgn}(\boldsymbol{\beta}^\nu)$ .*

*Proof.* The Karush-Kuhn-Tucker (KKT) conditions at weighted- $\ell_1$  minimization convergence imply that

$$\mathbf{x}'_j\mathbf{X}(\hat{\boldsymbol{\beta}} - \boldsymbol{\beta}^\nu) + \mathbf{x}'_j\mathbf{e}^S = -n\lambda\zeta_j \text{ for } j = 1 \dots p \quad (26)$$

where  $|\zeta_j| = \omega_j$  for  $j \in \hat{S}$  and  $|\zeta_j| \leq \omega_j$  for  $j \in \hat{S}^c$ . Following closely related proofs in Wainwright (2006, 2009); Zhou et al. (2009),  $\hat{S} \cap S^c = \emptyset$  occurs if and only if these KKT

conditions hold for projections restricted to  $S$ ,

$$\mathbf{X}'_S \mathbf{X}_S (\hat{\boldsymbol{\beta}}_S - \boldsymbol{\beta}_S^\nu) + \mathbf{X}'_S \mathbf{e}^S = -n\lambda \boldsymbol{\zeta}_S \Rightarrow \hat{\boldsymbol{\beta}}_S - \boldsymbol{\beta}_S^\nu = -n\lambda (\mathbf{X}'_S \mathbf{X}_S)^{-1} \boldsymbol{\zeta}_S. \quad (27)$$

Thus all of the spurious regressors in  $S^c$  will have  $\hat{\beta}_j = 0$  if and only if

$$\boldsymbol{\chi}'_j \mathbf{X}_S (\hat{\boldsymbol{\beta}}_S - \boldsymbol{\beta}_S^\nu) - \boldsymbol{\chi}'_j \mathbf{e}^S \leq n\lambda \zeta_j \Leftrightarrow 1 - \frac{|\boldsymbol{\chi}'_j \mathbf{e}^S|}{n} \geq 1 - \frac{\sqrt{2\nu}}{\lambda \omega_j} \geq |\boldsymbol{\chi}'_j \mathbf{X}_S (\mathbf{X}'_S \mathbf{X}_S)^{-1} \boldsymbol{\omega}_S|. \quad (28)$$

Finally, for sign recovery on  $j \in S$  we need  $|\beta_j^\nu| - |\beta_j^\nu - \hat{\beta}_j| > 0 \quad \forall j \in S$ , and our stated condition follows from  $\boldsymbol{\beta}_S^\nu = (\mathbf{X}'_S \mathbf{X}_S)^{-1} \mathbf{X}'_S \mathbf{y}$  and  $\boldsymbol{\beta}_S^\nu - \hat{\boldsymbol{\beta}}_S = n\lambda (\mathbf{X}'_S \mathbf{X}_S)^{-1} \boldsymbol{\zeta}_S$ .  $\square$

## 10 Extra proofs

### 10.1 Stagewise Regression

Theorem 3.1 uses the following simple result for stagewise regression – iterative fitting of new covariates to the residuals of an existing linear model (as in, e.g., Goldberger 1961).

LEMMA 10.1. *Say  $\text{MSE}_S = \|\mathbf{X}\boldsymbol{\beta}^S - \mathbf{y}\|^2/n$  and  $\text{cov}(\boldsymbol{\chi}_j, \mathbf{e}^S) = \boldsymbol{\chi}'_j(\mathbf{y} - \mathbf{X}\boldsymbol{\beta}^S)/n$  are sample variance and covariances. Then for any  $j \in 1 \dots p$ ,*

$$\text{cov}^2(\boldsymbol{\chi}_j, \mathbf{e}^S) \leq \text{MSE}_S - \text{MSE}_{S \cup j}$$

*Proof.* From the well-known property on the correlation coefficient ( $R^2$ ) for linear models, in-sample correlation and variances are such that

$$\frac{\text{cov}^2(\boldsymbol{\chi}_j, \mathbf{e}^S)}{\text{var}(\boldsymbol{\chi}_j) \text{var}(\mathbf{e}^S)} = 1 - \frac{\text{var}(\mathbf{e}^S - \tilde{\beta}_j \boldsymbol{\chi}_j)}{\text{var}(\mathbf{e}^S)}$$

where  $\tilde{\beta}_j = \boldsymbol{\chi}'_j \mathbf{e}^S / (\boldsymbol{\chi}'_j \boldsymbol{\chi}_j)$  is the stagewise coefficient estimate. Since  $\text{var}(\boldsymbol{\chi}_j) = 1$ , multiplying everything by  $\text{var}(\mathbf{e}^S)$  yields  $\text{cov}^2(\boldsymbol{\chi}_j, \mathbf{e}^S) = \text{var}(\mathbf{e}^S) - \text{var}(\mathbf{e}^S - \tilde{\beta}_j \boldsymbol{\chi}_j) \leq \text{var}(\mathbf{e}^S) - \text{var}(\mathbf{e}^{S \cup j})$ . The last inequality holds because  $\mathbf{e}^{S \cup j}$ , residuals from OLS on  $\mathbf{X}_{S \cup j}$ , have the smallest-possible sum of squares for that set of covariates. With  $\text{var}(\mathbf{e}^S) = \text{MSE}_S$ , etc, we are done.  $\square$

### 10.2 Bayesian MAP

PROPOSITION 10.1.  $\hat{\boldsymbol{\beta}}$  solves (14) if and only if it is also in the solution to (13).

*Proof.* The conditional posterior mode for each  $\tau_j$  given  $\beta_j$  is  $\tau(\beta_j) = \gamma s / (1 + \gamma |\beta_j|)$ . Any joint solution  $[\hat{\beta}, \hat{\tau}]$  for (13) thus consists of  $\hat{\tau}_j = \tau(\hat{\beta}_j)$ ; otherwise, it is always possible to decrease the objective by replacing  $\hat{\tau}_j$ . Setting each  $\tau_j = \tau(\beta_j)$  in (13) and removing constant terms yields (14). Moreover, the solution to (13) solves (14): otherwise, there would need to be a point on the profile slice of (13) defined by  $\tau_j = \tau(\hat{\beta}_j)$  that is lower than its minimum.  $\square$

For a Bayesian it is odd to be solving for  $\tau$  rather than marginalizing over its uncertainty. However, recognizing the form of a gamma density in (12),  $\pi(\beta_j, \tau_j)$  integrates over  $\tau_j$  to yield the marginal prior  $\pi(\beta_j) = 0.5s (1 + \gamma |\beta_j|)^{-(s+1)}$ . This is the generalized double Pareto density, as in Armagan et al. (2013). Since  $-\log \pi(\beta_j) \propto (s+1) \log(1 + \gamma |\beta_j|)$ , the *profile* MAP solution to (13) is also the *marginal* MAP for  $\beta$  under  $\text{Ga}(s-1, 1/\gamma)$  priors on each  $\tau_j$ .

## 11 Stability

A strong form of stability comes from convexity of the penalized objective in (1). This requires that the minimum eigenvalue of  $\mathbf{H}(\beta)$ , the Hessian matrix of second derivatives of  $l(\beta)$ , is greater than  $|c''(\beta_j)| \forall j$ . For penalized least-squares under log costs, this amounts to requiring that the minimum eigenvalue of  $\mathbf{H} = \mathbf{X}'\mathbf{X}$  is greater than  $\lambda\gamma^2$ .<sup>2</sup> In the simple *standardized orthogonal covariate* case, this has an easy interpretation in the context of our Bayesian model from Section 4.1: for Gaussian regression,  $h_j = \sum_i x_{ij}^2 = n$  and the objective is convex if prior variance on each  $\tau_j$  is less than the number of observations. For logistic regression you need  $\text{var}(\tau_j) < n/4$ , since  $\mathbf{H}$  now depends upon the coefficient values.

In real examples, however, we cannot rely upon objective convexity. A more useful definition of stability requires continuity of the implied coefficient function,  $\hat{\beta}(\mathbf{y})$ , in an imagined univariate regression problem (or for orthogonal covariates). This is one of the key requirements of concave penalties listed by Fan and Li (2001). Many popular concave cost functions, such as the SCAD and MCP, have been engineered to have this continuity property. Conveniently, Zou and Li (2008) show that OSE LLA solutions have this property even if the target objective does not. For example, even though the log penalty *does not* generally lead to continuous thresholding, their result implies that the GL solutions are continuous for  $\gamma < \infty$ .

A theoretically richer form of stability is Lipschitz continuity of the implied prediction function,  $\hat{\mathbf{y}} = \mathbf{X}\hat{\beta}(\mathbf{y})$ , which requires that  $\|\hat{\mathbf{y}}(\mathbf{y}_1) - \hat{\mathbf{y}}(\mathbf{y}_2)\| \leq L\|\mathbf{y}_1 - \mathbf{y}_2\|$  for some finite constant  $L$  on all possible  $\mathbf{y}_1, \mathbf{y}_2$ . Zou et al. (2007) establish Lipschitz continuity for  $\ell_1$  estimated

<sup>2</sup>If  $\nu$  is an eigenvalue of  $\mathbf{H}$ , then  $(\mathbf{H} - \nu\mathbf{I})\mathbf{v} = 0$  for some nonzero  $\mathbf{v}$ ; the negative log posterior Hessian at zero is  $\mathbf{H} - \lambda\gamma^2\mathbf{I}$  and  $(\mathbf{H} - \lambda\gamma^2\mathbf{I} + s\gamma^2\mathbf{I} - \nu\mathbf{I})\mathbf{v} = 0$  so that  $\nu - s\gamma^2$  is an eigenvalue of the minimization objective.

predictors as part of their derivation of a degrees-of-freedom estimator. Thus, conditional upon values for the coefficient-specific weights, POSE and GL are trivially Lipschitz continuous. Unconditionally, we do not believe that the paths have this guarantee. However, we'll see in the next section that a heuristic degrees-of-freedom estimator that takes such stability for granted performs well as the basis for model selection.

Finally, the basic and most important type of stability is practical path continuity: by this, we mean that solutions change slowly enough along the path so that computational costs are kept within budget. A regularization path can be built from a continuous thresholding function, or perhaps even be Lipschitz stable, but none of that matters if it takes too long to fit. For example, Figure 4 shows timings growing rapidly with large  $\gamma$  for the hockey data of Section 6, even though all of these specifications are theoretically stable by some criteria.

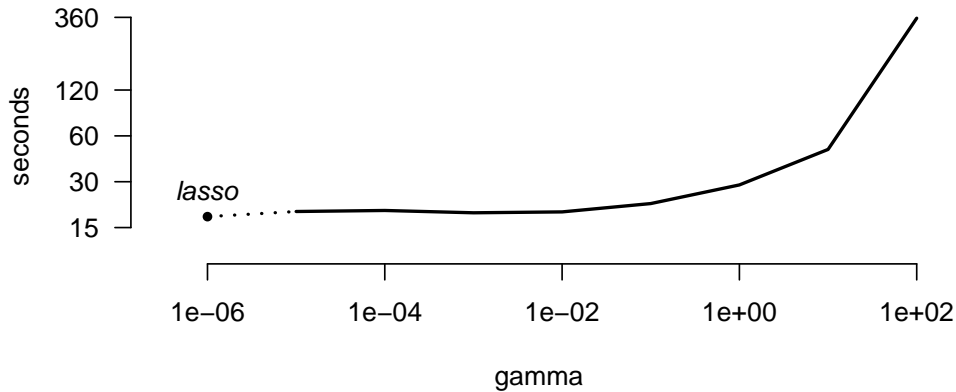

Figure 4: Timings for the hockey data path fits of Section 6 on a length-100 grid with  $\lambda^{100} = 0.01\lambda^1$ .

## 12 Information Criteria

We would like to choose a model that performs well in predicting new data. ‘Good prediction’ can be measured in a variety of ways. A common and coherent framework is to consider minimizing Kullback-Leibler (KL) divergence. Say  $g(\mathbf{y})$  is the true data generating process, and  $f(\mathbf{y}; \boldsymbol{\eta}, \phi)$  is the parametric density under study, which we suppose here is a natural exponential family with  $\mathbb{E}[\mathbf{y}] = \boldsymbol{\eta}$  and dispersion  $\phi$ . Then we wish to minimize

$$\text{KL}(\boldsymbol{\eta}, \phi) = \mathbb{E}_g \log g(\mathbf{y}) - \mathbb{E}_g \log f(\mathbf{y}; \boldsymbol{\eta}, \phi), \quad (29)$$

the expected difference between log true density and our parametric approximation. Since  $\mathbb{E}_g \log g(\mathbf{y})$  is constant, this leads one to minimize  $Q(\boldsymbol{\eta}, \phi) = -\mathbb{E}_g \log f(\mathbf{y}; \boldsymbol{\eta}, \phi)$ , the expected

negative log likelihood. There is no requirement that  $g$  is a member of the family defined by  $f$ .

If parameters are to be estimated as  $[\boldsymbol{\eta}_{\mathbf{y}}, \phi_{\mathbf{y}}]$ , functions of random sample  $\mathbf{y} \sim g$ , then  $Q(\boldsymbol{\eta}_{\mathbf{y}}, \phi_{\mathbf{y}})$  is itself a random variable and one chooses estimators to minimize its expectation. *Crucially, we imagine a double-sample expectation*, where the minimization objective is

$$\mathbb{E}_{\mathbf{y}|g} \mathbb{E}_{\tilde{\mathbf{y}}|g} \log f(\tilde{\mathbf{y}}; \boldsymbol{\eta}_{\mathbf{y}}, \phi_{\mathbf{y}}). \quad (30)$$

The notation here indicates that inner and outer expectations are based on two *independent* random samples from  $g$ :  $\mathbf{y}$  for training, upon which  $\boldsymbol{\eta}_{\mathbf{y}}, \phi_{\mathbf{y}}$  are calculated, and  $\tilde{\mathbf{y}}$  for validation.

Information criteria (IC) are analytic approximations to metrics like (30).<sup>3</sup> They take the form

$$-2 \log f(\mathbf{y}; \boldsymbol{\eta}_{\mathbf{y}}, \phi_{\mathbf{y}}) + c(df) \quad (31)$$

where  $c(df)$  is cost of the *degrees-of-freedom* used in  $\boldsymbol{\eta}_{\mathbf{y}}$  – e.g., for  $\mathbf{y} \sim (\boldsymbol{\eta}, \sigma^2 \mathbf{I})$ , Efron et al. (2004) defines  $df = \sigma^{-2} \sum_i \text{cov}(\eta_{yi}, y_i)$ .

Consider a Gaussian regression model where  $\boldsymbol{\eta}_{\mathbf{y}}$  is an estimate for  $\boldsymbol{\eta} = \mathbb{E}\mathbf{y}$  using  $df$  degrees of freedom, and set  $\phi_{\mathbf{y}} = \sigma_{\mathbf{y}}^2 = \sum_i (y_i - \eta_{yi})^2 / n$ . We'll derive

$$df \frac{n}{n - df - 1} \approx \mathbb{E}_{\mathbf{y}|g} [\log f(\mathbf{y}; \boldsymbol{\eta}_{\mathbf{y}}, \phi_{\mathbf{y}}) - \mathbb{E}_{\tilde{\mathbf{y}}|g} \log f(\tilde{\mathbf{y}}; \boldsymbol{\eta}_{\mathbf{y}}, \phi_{\mathbf{y}})] , \quad (32)$$

such that AICc's complexity penalty is the expected bias that results from taking the fitted log likelihood as an estimate for (30). First, by cancellation the inner term of (32) simplifies as

$$\log f(\mathbf{y}; \boldsymbol{\eta}_{\mathbf{y}}, \phi_{\mathbf{y}}) - \mathbb{E}_{\tilde{\mathbf{y}}|g} \log f(\tilde{\mathbf{y}}; \boldsymbol{\eta}_{\mathbf{y}}, \phi_{\mathbf{y}}) = \frac{\mathbb{E}_{\tilde{\mathbf{y}}|g} \sum_i (\tilde{y}_i - \eta_{yi})^2}{2\sigma_{\mathbf{y}}^2} - \frac{n}{2}. \quad (33)$$

Now, assume that the *true* model is linear and that the data were generated from  $\mathbf{y} \sim g(\boldsymbol{\eta}, \sigma^2 \mathbf{I})$ . The Mallows (1973)  $C_p$  formula holds that  $n\sigma_{\mathbf{y}}^2 + 2\sigma^2 df$  is an unbiased estimator for expected sum of square errors  $\mathbb{E}_{\tilde{\mathbf{y}}|g} \sum_i (\tilde{y}_i - \eta_{yi})^2 / n$ , such that

$$\frac{\mathbb{E}_{\tilde{\mathbf{y}}|g} \sum_i (\tilde{y}_i - \eta_{yi})^2}{2\sigma_{\mathbf{y}}^2} - \frac{n}{2} \approx \frac{n\sigma_{\mathbf{y}}^2 + 2\sigma^2 df}{2\sigma_{\mathbf{y}}^2} - \frac{n}{2} = df \frac{\sigma^2}{\sigma_{\mathbf{y}}^2}. \quad (34)$$

At this point, we see that the standard AIC approximation results from equating  $\sigma^2 \approx \mathbb{E}_{\mathbf{y}|g} \sigma_{\mathbf{y}}^2$ , so that  $df \mathbb{E}_{\mathbf{y}|g} [\sigma^2 / \sigma_{\mathbf{y}}^2] \approx df$ . This will underpenalize complexity whenever residual variance

---

<sup>3</sup>Not all IC target (30). For example, the 'Bayesian' BIC, with  $c(df) = \log(n)df$  (Schwarz, 1978), is derived (Kass and Raftery, 1995) as Laplace approximation to the negative log of the *marginal likelihood*. We include the BIC as a comparator to AIC and AICc in our examples.



$\sigma_y^2$  tends to be smaller than the true variance  $\sigma^2$  – that is, whenever the model is overfit. In contrast, AICc applies the chi-squared goodness of fit result  $n\sigma_y^2/\sigma^2 \sim \chi_{n-df-1}^2$  to obtain

$$\mathbb{E}_{\mathbf{y}|g} \left[ \frac{\sigma^2}{\sigma_y^2} df \right] = n \mathbb{E}_{\mathbf{y}|g} \left[ \frac{1}{n\sigma_y^2/\sigma^2} \right] df = \frac{n}{n-df-1} df. \quad (35)$$

Multiplying by  $-2$  and subtracting from  $-2 \log f(\mathbf{y}; \boldsymbol{\eta}_y, \sigma_y)$  yields the AICc.

### 13 Full simulation results

Continuous-response data are simulated from a  $p = 1000$  dimensional linear model

$$y \sim N(\mathbf{x}'\boldsymbol{\beta}, \sigma^2) \quad \text{where} \quad \beta_j = (-1)^j \exp\left(-\frac{j}{d}\right) \mathbb{1}_{[j \leq J]} \quad \text{for } j = 1 \dots p \quad (36)$$

We consider sample sizes of  $n = 100$  and  $n = 1000$ . For our *dense* simulation models,  $J = p$  so that all true coefficients are nonzero. For our *sparse* simulation models,  $J = n/10$ . With  $\mathbf{z}_i \sim N(\mathbf{0}, \Sigma)$  for  $i = 1 \dots n$ , the regression inputs  $\mathbf{x}_i$  are generated as either *continuous*  $x_{ij} = z_{ij}$  or *binary*  $x_{ij} \stackrel{\text{ind}}{\sim} \text{Bern}(1/(1 + e^{-z_{ij}}))$ .

Each simulation draws  $n$  means  $\eta_i = \mathbf{x}_i' \boldsymbol{\beta}$ , and two independent response samples  $\mathbf{y}, \tilde{\mathbf{y}} \sim N(\boldsymbol{\eta}, \sigma^2 \mathbf{I})$ . Residual variance  $\sigma^2$  and covariate correlation  $\Sigma$  are adjusted across runs. In the first case, we define  $\sigma^2$  through *signal-to-noise* ratios  $\text{sd}(\boldsymbol{\eta})/\sigma$  of  $1/2$ ,  $1$ , and  $2$ . In the latter case, multicollinearity is parametrized via  $\Sigma_{jk} = \rho^{|j-k|}$ , and we consider  $\rho = 0, 0.5$ , and  $0.9$ . Finally, the coefficient decay rate  $d$  controls the effective sparsity: how much  $\boldsymbol{\beta}$  is *measurably* different from zero. See Figure 5 for illustration; we consider  $d$  of  $10, 50, 100$ , and  $200$ .

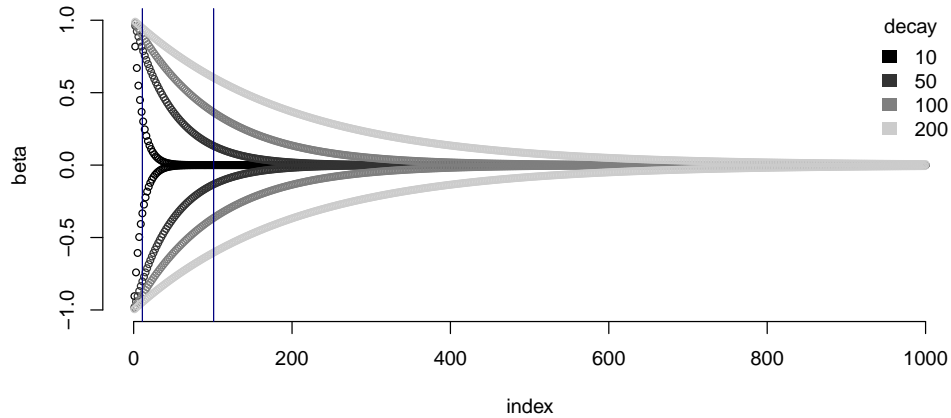

Figure 5: The linear model coefficients for our simulation in 36. Vertical lines mark thresholding points for the *sparse* model simulations, at  $J = 10$  for  $n = 100$  and at  $J = 100$  for  $n = 1000$ .

## References

- Armagan, A., D. B. Dunson, and J. Lee (2013). Generalized Double Pareto Shrinkage. *Statistica Sinica* 23, 119–143.
- Bühlmann, P. and S. van de Geer (2011). *Statistics for High-Dimensional Data*. Springer.
- Efron, B., T. Hastie, I. Johnstone, and R. Tibshirani (2004). Least Angle Regression. *Annals of Statistics* 32, 407–499.
- Fan, J. and R. Li (2001). Variable Selection via Nonconcave Penalized Likelihood and its Oracle Properties. *Journal of the American Statistical Association* 96, 1348–1360.
- Fan, J., L. Xue, and H. Zou (2014). Strong oracle optimality of folded concave penalized estimation. *The Annals of Statistics* 42(3), 819–849.
- Friedman, J., T. Hastie, H. Hofling, and R. Tibshirani (2007). Pathwise coordinate optimization. *The Annals of Applied Statistics* 1, 302–332.
- Friedman, J., T. Hastie, and R. Tibshirani (2010). Regularization paths for generalized linear models via coordinate descent. *Journal of Statistical Software* 33, 1–22.
- Goldberger, A. S. (1961). Stepwise Least Squares: Residual analysis and specification error. *Journal of the American Statistical Association* 56, 998.
- Green, P. J. (1984). Iteratively Reweighted Least Squares for Maximum Likelihood Estimation, and some Robust and Resistant Alternatives. *Journal of the Royal Statistical Society, Series B* 46, 149–192.
- Kass, R. E. and A. E. Raftery (1995). Bayes factors. *Journal of the American Statistical Association* 90, 773–795.
- Lange, K. (2010). *Numerical Analysis for Statisticians* (2nd ed.). Springer.
- Lee, J., Y. Sun, and M. Saunders (2014). Proximal newton-type methods for minimizing convex objective functions in composite form. *SIAM Journal on Optimization* 24, 1420–1443.
- Liu, J., S. J. Wright, C. Ré, V. Bittorf, and S. Sridhar (2015). An asynchronous parallel stochastic coordinate descent algorithm. *The Journal of Machine Learning Research* 16(1), 285–322.
- Luenberger, D. G. and Y. Ye (2008). *Linear and Nonlinear Programming* (3rd ed.). Springer.
- Mallows, C. L. (1973). Some comments on CP. *Technometrics* 15, 661–675.
- Schwarz, G. (1978). Estimating the dimension of a model. *The Annals of Statistics* 6, 461–464.

- Tseng, P. (2001). Convergence of a block coordinate descent method for nondifferentiable minimization. *Journal of Optimization Theory and Applications* 109, 475–494.
- Wainwright, M. J. (2006). Sharp thresholds for high-dimensional and noisy recovery of sparsity. *UC Berkeley Technical Report*.
- Wainwright, M. J. (2009). Sharp thresholds for high-dimensional and noisy sparsity recovery using L1-constrained quadratic programming (Lasso). *IEEE Transactions on Information Theory* 55, 2183–2202.
- Wu, T. T. and K. Lange (2008). Coordinate descent algorithms for lasso penalized regression. *The Annals of Applied Statistics* 2, 1–21.
- Zhou, S. (2009). Thresholding procedures for high-dimensional variable selection and statistical estimation. *Advances in Neural Information Processing Systems* 22.
- Zhou, S., S. van de Geer, and P. Bühlmann (2009). Adaptive lasso for high dimensional regression and Gaussian graphical modeling. *arXiv:0903.2515*.
- Zou, H. (2006). The adaptive lasso and its oracle properties. *Journal of the American Statistical Association* 101, 1418–1429.
- Zou, H., T. Hastie, and R. Tibshirani (2007). On the degrees of freedom of the lasso. *The Annals of Statistics* 35, 2173–2192.
- Zou, H. and R. Li (2008). One-step sparse estimates in nonconcave penalized likelihood models. *The Annals of Statistics* 36, 1509–1533.

## Detailed simulation tables

### PREDICTION MSE

n=1000. Sparse simulation model: Tables 4-11, Dense simulation model: Tables 12-19  
n=100. Sparse simulation model: Tables 20-27, Dense simulation model: Tables 28-35

### ESTIMATION MSE

n=1000. Sparse simulation model: Tables 36-43, Dense simulation model: Tables 44-51  
n=100. Sparse simulation model: Tables 52-59, Dense simulation model: Tables 60-67

### FITTED MODEL DIMENSION

n=1000. Sparse simulation model: Tables 68-75, Dense simulation model: Tables 76-83  
n=100. Sparse simulation model: Tables 84-91, Dense simulation model: Tables 92-99

### SENSITIVITY AND FDR

n=1000. Sparse simulation model: Tables 100-107, Dense simulation model: Tables 108-115  
n=100. Sparse simulation model: Tables 116-123, Dense simulation model: Tables 124-131

Table 4: **Prediction MSE for n=1000, binary design, dense covariates, and decay 10.**

|        | lasso | GL $\gamma = 1$ | GL $\gamma = 10$ | AL   | MCP         | CVbest      | ICbest |                                                                       |
|--------|-------|-----------------|------------------|------|-------------|-------------|--------|-----------------------------------------------------------------------|
| CV.1se | 0.34  | 0.34            | 0.33             | 0.33 | 0.32        |             |        | $\text{sd}(\mu)/\sigma = 2$<br>$\rho = 0$<br><i>Oracle</i> : 0.30     |
| CV.min | 0.32  | 0.32            | <b>0.31</b>      | 0.32 | <b>0.31</b> | 0.31        |        |                                                                       |
| AICc   | 0.32  | 0.32            | <b>0.31</b>      | 0.32 |             |             | 0.31   |                                                                       |
| AIC    | 0.42  | 0.42            | 0.45             | 0.32 |             |             |        |                                                                       |
| BIC    | 0.35  | 0.34            | 0.32             | 0.33 |             |             |        |                                                                       |
| CV.1se | 0.31  | 0.30            | 0.29             | 0.30 | 0.29        |             |        | $\text{sd}(\mu)/\sigma = 2$<br>$\rho = 0.5$<br><i>Oracle</i> : 0.26   |
| CV.min | 0.29  | 0.29            | <b>0.28</b>      | 0.29 | <b>0.28</b> | 0.28        |        |                                                                       |
| AICc   | 0.29  | 0.29            | <b>0.28</b>      | 0.29 |             |             | 0.28   |                                                                       |
| AIC    | 0.37  | 0.38            | 0.40             | 0.29 |             |             |        |                                                                       |
| BIC    | 0.32  | 0.31            | 0.29             | 0.30 |             |             |        |                                                                       |
| CV.1se | 0.29  | 0.29            | 0.28             | 0.28 | 0.27        |             |        | $\text{sd}(\mu)/\sigma = 2$<br>$\rho = 0.9$<br><i>Oracle</i> : 0.25   |
| CV.min | 0.28  | 0.27            | <b>0.26</b>      | 0.27 | <b>0.26</b> | 0.26        |        |                                                                       |
| AICc   | 0.28  | 0.27            | <b>0.26</b>      | 0.27 |             |             | 0.26   |                                                                       |
| AIC    | 0.35  | 0.35            | 0.37             | 0.27 |             |             |        |                                                                       |
| BIC    | 0.30  | 0.29            | 0.27             | 0.28 |             |             |        |                                                                       |
| CV.1se | 1.34  | 1.32            | 1.29             | 1.25 | 1.27        |             |        | $\text{sd}(\mu)/\sigma = 1$<br>$\rho = 0$<br><i>Oracle</i> : 1.17     |
| CV.min | 1.26  | 1.25            | <b>1.23</b>      | 1.28 | <b>1.23</b> | 1.23        |        |                                                                       |
| AICc   | 1.26  | 1.25            | 1.27             | 1.27 |             |             | 1.26   |                                                                       |
| AIC    | 1.85  | 1.87            | 2.00             | 1.31 |             |             |        |                                                                       |
| BIC    | 1.35  | 1.31            | 1.28             | 1.27 |             |             |        |                                                                       |
| CV.1se | 1.21  | 1.18            | 1.15             | 1.12 | 1.13        |             |        | $\text{sd}(\mu)/\sigma = 1$<br>$\rho = 0.5$<br><i>Oracle</i> : 1.05   |
| CV.min | 1.14  | 1.12            | <b>1.1</b>       | 1.15 | <b>1.1</b>  | 1.10        |        |                                                                       |
| AICc   | 1.14  | 1.12            | 1.13             | 1.13 |             |             | 1.13   |                                                                       |
| AIC    | 1.65  | 1.67            | 1.78             | 1.18 |             |             |        |                                                                       |
| BIC    | 1.22  | 1.18            | 1.15             | 1.14 |             |             |        |                                                                       |
| CV.1se | 1.14  | 1.12            | 1.09             | 1.06 | 1.07        |             |        | $\text{sd}(\mu)/\sigma = 1$<br>$\rho = 0.9$<br><i>Oracle</i> : 0.99   |
| CV.min | 1.08  | 1.06            | <b>1.04</b>      | 1.08 | <b>1.04</b> | 1.05        |        |                                                                       |
| AICc   | 1.08  | 1.06            | 1.07             | 1.08 |             |             | 1.07   |                                                                       |
| AIC    | 1.55  | 1.57            | 1.68             | 1.11 |             |             |        |                                                                       |
| BIC    | 1.16  | 1.12            | 1.09             | 1.09 |             |             |        |                                                                       |
| CV.1se | 5.21  | 5.16            | 5.11             | 4.90 | 5.07        |             |        | $\text{sd}(\mu)/\sigma = 0.5$<br>$\rho = 0$<br><i>Oracle</i> : 4.66   |
| CV.min | 4.93  | <b>4.89</b>     | 4.90             | 5.20 | <b>4.89</b> | 4.89        |        |                                                                       |
| AICc   | 4.92  | <b>4.89</b>     | 5.17             | 5.08 |             |             | 4.97   |                                                                       |
| AIC    | 7.90  | 8.06            | 8.55             | 6.07 |             |             |        |                                                                       |
| BIC    | 5.13  | 5.09            | 5.21             | 4.95 |             |             |        |                                                                       |
| CV.1se | 4.68  | 4.62            | 4.57             | 4.39 | 4.53        |             |        | $\text{sd}(\mu)/\sigma = 0.5$<br>$\rho = 0.5$<br><i>Oracle</i> : 4.16 |
| CV.min | 4.42  | 4.38            | 4.38             | 4.67 | <b>4.37</b> | <b>4.38</b> |        |                                                                       |
| AICc   | 4.41  | 4.38            | 4.62             | 4.55 |             |             | 4.47   |                                                                       |
| AIC    | 7.06  | 7.19            | 7.62             | 5.44 |             |             |        |                                                                       |
| BIC    | 4.62  | 4.57            | 4.64             | 4.46 |             |             |        |                                                                       |
| CV.1se | 4.43  | 4.38            | 4.33             | 4.17 | 4.28        |             |        | $\text{sd}(\mu)/\sigma = 0.5$<br>$\rho = 0.9$<br><i>Oracle</i> : 3.93 |
| CV.min | 4.18  | 4.15            | 4.16             | 4.40 | <b>4.14</b> | <b>4.15</b> |        |                                                                       |
| AICc   | 4.18  | 4.15            | 4.38             | 4.31 |             |             | 4.23   |                                                                       |
| AIC    | 6.66  | 6.78            | 7.20             | 5.08 |             |             |        |                                                                       |
| BIC    | 4.39  | 4.34            | 4.41             | 4.23 |             |             |        |                                                                       |

Table 5: **Prediction MSE for n=1000, binary design, dense covariates, and decay 50.**

|        | lasso        | GL $\gamma = 1$ | GL $\gamma = 10$ | AL    | MCP         | CVbest      | ICbest      |                                                                        |
|--------|--------------|-----------------|------------------|-------|-------------|-------------|-------------|------------------------------------------------------------------------|
| CV.lse | 2.22         | 2.18            | 2.18             | 2.15  | 2.10        |             |             | $\text{sd}(\mu)/\sigma = 2$<br>$\rho = 0$<br><i>Oracle</i> : 1.77      |
| CV.min | 2.07         | 2.03            | 2.05             | 2.07  | <b>2.01</b> | 2.04        |             |                                                                        |
| AICc   | 2.14         | 2.06            | 2.04             | 2.09  |             |             | 2.04        |                                                                        |
| AIC    | 2.52         | 2.56            | 2.73             | 2.07  |             |             |             |                                                                        |
| BIC    | 2.82         | 2.60            | 2.38             | 2.47  |             |             |             |                                                                        |
| CV.lse | 1.99         | 1.96            | 1.95             | 1.95  | 1.88        |             |             | $\text{sd}(\mu)/\sigma = 2$<br>$\rho = 0.5$<br><i>Oracle</i> : 1.57    |
| CV.min | 1.85         | 1.82            | 1.83             | 1.87  | <b>1.79</b> | <b>1.82</b> |             |                                                                        |
| AICc   | 1.93         | 1.85            | 1.82             | 1.89  |             |             | <b>1.82</b> |                                                                        |
| AIC    | 2.25         | 2.28            | 2.43             | 1.87  |             |             |             |                                                                        |
| BIC    | 2.63         | 2.38            | 2.13             | 2.27  |             |             |             |                                                                        |
| CV.lse | 1.87         | 1.84            | 1.83             | 1.85  | 1.77        |             |             | $\text{sd}(\mu)/\sigma = 2$<br>$\rho = 0.9$<br><i>Oracle</i> : 1.48    |
| CV.min | 1.75         | 1.71            | 1.72             | 1.77  | <b>1.69</b> | 1.72        |             |                                                                        |
| AICc   | 1.82         | 1.75            | 1.71             | 1.79  |             |             | <b>1.71</b> |                                                                        |
| AIC    | 2.11         | 2.14            | 2.28             | 1.77  |             |             |             |                                                                        |
| BIC    | 2.50         | 2.27            | 2.00             | 2.16  |             |             |             |                                                                        |
| CV.lse | 8.48         | 8.43            | 8.71             | 7.83  | 8.19        |             |             | $\text{sd}(\mu)/\sigma = 1$<br>$\rho = 0$<br><i>Oracle</i> : 6.88      |
| CV.min | 7.81         | 7.79            | 8.13             | 7.85  | 7.79        | 7.81        |             |                                                                        |
| AICc   | 7.91         | <b>7.76</b>     | 8.54             | 7.80  |             |             | 8.32        |                                                                        |
| AIC    | 10.67        | 10.91           | 11.60            | 8.52  |             |             |             |                                                                        |
| BIC    | 10.46        | 9.64            | 10.63            | 8.90  |             |             |             |                                                                        |
| CV.lse | 7.64         | 7.56            | 7.75             | 7.05  | 7.34        |             |             | $\text{sd}(\mu)/\sigma = 1$<br>$\rho = 0.5$<br><i>Oracle</i> : 6.11    |
| CV.min | 7.00         | 6.96            | 7.23             | 7.05  | 6.98        | 6.99        |             |                                                                        |
| AICc   | 7.11         | <b>6.95</b>     | 7.54             | 7.01  |             |             | 7.47        |                                                                        |
| AIC    | 9.49         | 9.69            | 10.29            | 7.65  |             |             |             |                                                                        |
| BIC    | 9.75         | 8.86            | 9.54             | 8.14  |             |             |             |                                                                        |
| CV.lse | 7.20         | 7.13            | 7.36             | 6.69  | 6.92        |             |             | $\text{sd}(\mu)/\sigma = 1$<br>$\rho = 0.9$<br><i>Oracle</i> : 5.75    |
| CV.min | 6.61         | 6.57            | 6.86             | 6.67  | 6.59        | 6.59        |             |                                                                        |
| AICc   | 6.72         | <b>6.56</b>     | 7.11             | 6.64  |             |             | 7.05        |                                                                        |
| AIC    | 8.92         | 9.11            | 9.68             | 7.18  |             |             |             |                                                                        |
| BIC    | 9.29         | 8.44            | 9.08             | 7.77  |             |             |             |                                                                        |
| CV.lse | 30.41        | 30.51           | 30.62            | 28.92 | 30.45       |             |             | $\text{sd}(\mu)/\sigma = 0.5$<br>$\rho = 0$<br><i>Oracle</i> : 26.71   |
| CV.min | 28.91        | 29.51           | 30.38            | 30.23 | 28.94       | 29.01       |             |                                                                        |
| AICc   | <b>28.81</b> | 29.04           | 32.33            | 29.50 |             |             | 29.02       |                                                                        |
| AIC    | 44.19        | 45.58           | 47.69            | 36.58 |             |             |             |                                                                        |
| BIC    | 30.59        | 30.57           | 30.65            | 30.31 |             |             |             |                                                                        |
| CV.lse | 27.07        | 27.11           | 27.19            | 25.86 | 27.08       |             |             | $\text{sd}(\mu)/\sigma = 0.5$<br>$\rho = 0.5$<br><i>Oracle</i> : 23.69 |
| CV.min | 25.89        | 26.35           | 27.03            | 27.01 | 25.93       | 25.96       |             |                                                                        |
| AICc   | <b>25.77</b> | 25.89           | 29.02            | 26.38 |             |             | 25.88       |                                                                        |
| AIC    | 39.26        | 40.45           | 42.30            | 32.78 |             |             |             |                                                                        |
| BIC    | 27.17        | 27.16           | 27.20            | 26.98 |             |             |             |                                                                        |
| CV.lse | 25.52        | 25.57           | 25.62            | 24.47 | 25.56       |             |             | $\text{sd}(\mu)/\sigma = 0.5$<br>$\rho = 0.9$<br><i>Oracle</i> : 22.33 |
| CV.min | 24.45        | 24.87           | 25.48            | 25.45 | 24.47       | 24.52       |             |                                                                        |
| AICc   | <b>24.32</b> | 24.42           | 27.06            | 24.91 |             |             | 24.43       |                                                                        |
| AIC    | 36.90        | 38.04           | 39.80            | 30.65 |             |             |             |                                                                        |
| BIC    | 25.60        | 25.59           | 25.63            | 25.45 |             |             |             |                                                                        |

Table 6: **Prediction MSE for n=1000, binary design, dense covariates, and decay 100.**

|        | lasso        | GL $\gamma = 1$ | GL $\gamma = 10$ | AL    | MCP          | CVbest | ICbest |                                                                        |
|--------|--------------|-----------------|------------------|-------|--------------|--------|--------|------------------------------------------------------------------------|
| CV.lse | 4.93         | 4.93            | 5.13             | 4.95  | 4.74         |        |        | $\text{sd}(\mu)/\sigma = 2$<br>$\rho = 0$<br><i>Oracle</i> : 3.92      |
| CV.min | 4.56         | 4.55            | 4.77             | 4.69  | <b>4.54</b>  | 4.56   |        |                                                                        |
| AICc   | 4.97         | 4.74            | 4.69             | 4.82  |              |        | 4.69   |                                                                        |
| AIC    | 5.26         | 5.36            | 5.71             | 4.65  |              |        |        |                                                                        |
| BIC    | 11.76        | 7.65            | 5.74             | 6.80  |              |        |        |                                                                        |
| CV.lse | 4.43         | 4.41            | 4.59             | 4.50  | 4.26         |        |        | $\text{sd}(\mu)/\sigma = 2$<br>$\rho = 0.5$<br><i>Oracle</i> : 3.47    |
| CV.min | 4.09         | <b>4.06</b>     | 4.25             | 4.25  | <b>4.06</b>  | 4.08   |        |                                                                        |
| AICc   | 4.49         | 4.27            | 4.16             | 4.37  |              |        | 4.16   |                                                                        |
| AIC    | 4.68         | 4.76            | 5.06             | 4.19  |              |        |        |                                                                        |
| BIC    | 12.00        | 7.34            | 5.10             | 6.48  |              |        |        |                                                                        |
| CV.lse | 4.17         | 4.16            | 4.31             | 4.30  | 4.00         |        |        | $\text{sd}(\mu)/\sigma = 2$<br>$\rho = 0.9$<br><i>Oracle</i> : 3.27    |
| CV.min | 3.86         | <b>3.83</b>     | 3.99             | 4.04  | <b>3.83</b>  | 3.84   |        |                                                                        |
| AICc   | 4.24         | 4.03            | 3.93             | 4.17  |              |        | 3.93   |                                                                        |
| AIC    | 4.40         | 4.47            | 4.76             | 3.97  |              |        |        |                                                                        |
| BIC    | 11.64        | 7.13            | 4.80             | 6.31  |              |        |        |                                                                        |
| CV.lse | 18.86        | 19.46           | 22.40            | 17.23 | 18.29        |        |        | $\text{sd}(\mu)/\sigma = 1$<br>$\rho = 0$<br><i>Oracle</i> : 14.88     |
| CV.min | <b>16.91</b> | 17.35           | 20.03            | 17.04 | <b>16.91</b> | 16.95  |        |                                                                        |
| AICc   | 17.48        | 17.08           | 18.88            | 17.04 |              |        | 17.83  |                                                                        |
| AIC    | 21.90        | 22.52           | 23.77            | 18.38 |              |        |        |                                                                        |
| BIC    | 24.64        | 24.28           | 24.73            | 22.96 |              |        |        |                                                                        |
| CV.lse | 17.09        | 17.59           | 20.25            | 15.52 | 16.55        |        |        | $\text{sd}(\mu)/\sigma = 1$<br>$\rho = 0.5$<br><i>Oracle</i> : 13.17   |
| CV.min | <b>15.17</b> | 15.53           | 18.18            | 15.31 | <b>15.17</b> | 15.21  |        |                                                                        |
| AICc   | 15.75        | 15.30           | 16.73            | 15.32 |              |        | 16.25  |                                                                        |
| AIC    | 19.43        | 19.95           | 21.04            | 16.45 |              |        |        |                                                                        |
| BIC    | 21.85        | 21.67           | 21.93            | 20.83 |              |        |        |                                                                        |
| CV.lse | 16.11        | 16.52           | 19.24            | 14.72 | 15.62        |        |        | $\text{sd}(\mu)/\sigma = 1$<br>$\rho = 0.9$<br><i>Oracle</i> : 12.42   |
| CV.min | <b>14.32</b> | 14.64           | 17.15            | 14.48 | 14.33        | 14.35  |        |                                                                        |
| AICc   | 14.91        | 14.44           | 15.77            | 14.52 |              |        | 15.32  |                                                                        |
| AIC    | 18.27        | 18.76           | 19.80            | 15.47 |              |        |        |                                                                        |
| BIC    | 20.60        | 20.48           | 20.64            | 19.70 |              |        |        |                                                                        |
| CV.lse | 61.85        | 61.95           | 61.96            | 59.96 | 61.90        |        |        | $\text{sd}(\mu)/\sigma = 0.5$<br>$\rho = 0$<br><i>Oracle</i> : 56.30   |
| CV.min | 60.09        | 61.49           | 61.94            | 62.57 | 60.06        | 60.24  |        |                                                                        |
| AICc   | <b>59.74</b> | 61.12           | 64.65            | 60.97 |              |        | 60.84  |                                                                        |
| AIC    | 89.79        | 93.17           | 96.87            | 76.06 |              |        |        |                                                                        |
| BIC    | 61.93        | 61.94           | 61.96            | 61.79 |              |        |        |                                                                        |
| CV.lse | 54.84        | 54.89           | 54.90            | 53.43 | 54.87        |        |        | $\text{sd}(\mu)/\sigma = 0.5$<br>$\rho = 0.5$<br><i>Oracle</i> : 49.87 |
| CV.min | 53.63        | 54.59           | 54.90            | 55.72 | 53.68        | 53.77  |        |                                                                        |
| AICc   | <b>53.28</b> | 54.24           | 57.69            | 54.35 |              |        | 53.99  |                                                                        |
| AIC    | 79.60        | 82.49           | 85.78            | 67.95 |              |        |        |                                                                        |
| BIC    | 54.88        | 54.89           | 54.90            | 54.78 |              |        |        |                                                                        |
| CV.lse | 51.68        | 51.71           | 51.72            | 50.51 | 51.71        |        |        | $\text{sd}(\mu)/\sigma = 0.5$<br>$\rho = 0.9$<br><i>Oracle</i> : 46.94 |
| CV.min | 50.61        | 51.47           | 51.72            | 52.52 | 50.62        | 50.75  |        |                                                                        |
| AICc   | <b>50.25</b> | 51.16           | 54.14            | 51.30 |              |        | 50.95  |                                                                        |
| AIC    | 74.83        | 77.59           | 80.74            | 63.52 |              |        |        |                                                                        |
| BIC    | 51.70        | 51.70           | 51.72            | 51.63 |              |        |        |                                                                        |

Table 7: **Prediction MSE for n=1000, binary design, dense covariates, and decay 200.**

|        | lasso         | GL $\gamma = 1$ | GL $\gamma = 10$ | AL           | MCP          | CVbest | ICbest |                                                                         |
|--------|---------------|-----------------|------------------|--------------|--------------|--------|--------|-------------------------------------------------------------------------|
| CV.lse | 11.14         | 11.67           | 14.02            | 11.52        | 10.67        |        |        | $\text{sd}(\mu)/\sigma = 2$<br>$\rho = 0$<br><i>Oracle : 8.99</i>       |
| CV.min | 10.01         | 10.28           | 11.57            | 10.65        | <b>9.96</b>  | 10.02  |        |                                                                         |
| AICc   | 12.40         | 11.26           | 10.74            | 11.43        |              |        | 10.74  |                                                                         |
| AIC    | 10.87         | 11.12           | 11.75            | 10.29        |              |        |        |                                                                         |
| BIC    | 31.02         | 30.70           | 22.48            | 28.59        |              |        |        |                                                                         |
| CV.lse | 10.11         | 10.55           | 13.01            | 10.54        | 9.67         |        |        | $\text{sd}(\mu)/\sigma = 2$<br>$\rho = 0.5$<br><i>Oracle : 7.97</i>     |
| CV.min | 8.99          | 9.22            | 10.54            | 9.69         | <b>8.93</b>  | 9.00   |        |                                                                         |
| AICc   | 11.39         | 10.18           | 9.56             | 10.45        |              |        | 9.56   |                                                                         |
| AIC    | 9.65          | 9.86            | 10.40            | 9.29         |              |        |        |                                                                         |
| BIC    | 27.48         | 27.38           | 21.35            | 26.13        |              |        |        |                                                                         |
| CV.lse | 9.46          | 9.91            | 12.60            | 10.08        | 9.07         |        |        | $\text{sd}(\mu)/\sigma = 2$<br>$\rho = 0.9$<br><i>Oracle : 7.51</i>     |
| CV.min | 8.46          | 8.67            | 9.98             | 9.21         | <b>8.41</b>  | 8.47   |        |                                                                         |
| AICc   | 10.75         | 9.61            | 9.01             | 9.99         |              |        | 9.01   |                                                                         |
| AIC    | 9.07          | 9.27            | 9.78             | 8.78         |              |        |        |                                                                         |
| BIC    | 25.87         | 25.76           | 20.43            | 24.77        |              |        |        |                                                                         |
| CV.lse | 42.32         | 46.60           | 49.69            | 37.25        | 41.22        |        |        | $\text{sd}(\mu)/\sigma = 1$<br>$\rho = 0$<br><i>Oracle : 32.78</i>      |
| CV.min | 36.36         | 40.66           | 48.78            | 36.41        | <b>36.32</b> | 36.42  |        |                                                                         |
| AICc   | 38.68         | 36.96           | 40.79            | 36.80        |              |        | 37.23  |                                                                         |
| AIC    | 44.46         | 45.96           | 48.21            | 38.73        |              |        |        |                                                                         |
| BIC    | 49.76         | 49.76           | 49.81            | 49.26        |              |        |        |                                                                         |
| CV.lse | 38.81         | 42.45           | 44.07            | 33.54        | 38.03        |        |        | $\text{sd}(\mu)/\sigma = 1$<br>$\rho = 0.5$<br><i>Oracle : 29.03</i>    |
| CV.min | 32.89         | 37.27           | 43.45            | <b>32.7</b>  | 32.83        | 32.93  |        |                                                                         |
| AICc   | 35.14         | 33.13           | 36.23            | 33.10        |              |        | 33.62  |                                                                         |
| AIC    | 39.44         | 40.71           | 42.68            | 34.60        |              |        |        |                                                                         |
| BIC    | 44.09         | 44.08           | 44.12            | 43.75        |              |        |        |                                                                         |
| CV.lse | 36.66         | 39.88           | 41.48            | 31.83        | 36.00        |        |        | $\text{sd}(\mu)/\sigma = 1$<br>$\rho = 0.9$<br><i>Oracle : 27.37</i>    |
| CV.min | 31.09         | 34.94           | 40.95            | <b>30.91</b> | 31.05        | 31.14  |        |                                                                         |
| AICc   | 33.09         | 31.24           | 34.04            | 31.35        |              |        | 31.75  |                                                                         |
| AIC    | 37.06         | 38.26           | 40.14            | 32.51        |              |        |        |                                                                         |
| BIC    | 41.50         | 41.50           | 41.53            | 41.22        |              |        |        |                                                                         |
| CV.lse | 124.61        | 124.67          | 124.67           | 122.31       | 124.65       |        |        | $\text{sd}(\mu)/\sigma = 0.5$<br>$\rho = 0$<br><i>Oracle : 118.96</i>   |
| CV.min | 122.59        | 124.58          | 124.76           | 127.56       | 122.60       | 122.83 |        |                                                                         |
| AICc   | <b>121.94</b> | 127.84          | 127.54           | 124.38       |              |        | 126.15 |                                                                         |
| AIC    | 181.11        | 189.10          | 195.52           | 155.43       |              |        |        |                                                                         |
| BIC    | 124.65        | 124.67          | 126.69           | 124.53       |              |        |        |                                                                         |
| CV.lse | 110.36        | 110.39          | 110.40           | 108.74       | 110.39       |        |        | $\text{sd}(\mu)/\sigma = 0.5$<br>$\rho = 0.5$<br><i>Oracle : 105.41</i> |
| CV.min | 109.04        | 110.34          | 110.47           | 113.45       | 109.10       | 109.19 |        |                                                                         |
| AICc   | <b>108.53</b> | 112.85          | 113.18           | 110.60       |              |        | 111.39 |                                                                         |
| AIC    | 160.43        | 167.29          | 173.04           | 138.30       |              |        |        |                                                                         |
| BIC    | 110.38        | 110.39          | 110.77           | 110.31       |              |        |        |                                                                         |
| CV.lse | 103.91        | 103.92          | 103.92           | 102.63       | 103.92       |        |        | $\text{sd}(\mu)/\sigma = 0.5$<br>$\rho = 0.9$<br><i>Oracle : 99.15</i>  |
| CV.min | 102.75        | 103.86          | 103.98           | 106.77       | 102.85       | 102.94 |        |                                                                         |
| AICc   | <b>102.27</b> | 106.26          | 106.53           | 104.36       |              |        | 104.97 |                                                                         |
| AIC    | 150.74        | 157.29          | 162.82           | 129.44       |              |        |        |                                                                         |
| BIC    | 103.90        | 103.92          | 104.37           | 103.84       |              |        |        |                                                                         |

Table 8: **Prediction MSE for n=1000, continuous design, dense covariates, and decay 10.**

|        | lasso | GL $\gamma = 1$ | GL $\gamma = 10$ | AL          | MCP          | CVbest      | ICbest      |                                                                       |
|--------|-------|-----------------|------------------|-------------|--------------|-------------|-------------|-----------------------------------------------------------------------|
| CV.1se | 1.38  | 1.35            | 1.31             | 1.32        | 1.28         |             |             | $\text{sd}(\mu)/\sigma = 2$<br>$\rho = 0$<br><i>Oracle</i> : 1.18     |
| CV.min | 1.30  | 1.28            | 1.25             | 1.27        | <b>1.24</b>  | <b>1.25</b> |             |                                                                       |
| AICc   | 1.30  | 1.28            | 1.27             | 1.27        |              |             | 1.27        |                                                                       |
| AIC    | 1.68  | 1.69            | 1.78             | 1.27        |              |             |             |                                                                       |
| BIC    | 1.42  | 1.37            | 1.32             | 1.32        |              |             |             |                                                                       |
| CV.1se | 0.56  | 0.55            | 0.51             | 0.61        | 0.49         |             |             | $\text{sd}(\mu)/\sigma = 2$<br>$\rho = 0.5$<br><i>Oracle</i> : 0.45   |
| CV.min | 0.53  | 0.51            | 0.49             | 0.59        | <b>0.47</b>  | <b>0.49</b> |             |                                                                       |
| AICc   | 0.53  | 0.52            | 0.49             | 0.59        |              |             | <b>0.49</b> |                                                                       |
| AIC    | 0.61  | 0.61            | 0.63             | 0.59        |              |             |             |                                                                       |
| BIC    | 0.64  | 0.60            | 0.54             | 0.61        |              |             |             |                                                                       |
| CV.1se | 0.16  | 0.15            | 0.14             | 0.17        | 0.14         |             |             | $\text{sd}(\mu)/\sigma = 2$<br>$\rho = 0.9$<br><i>Oracle</i> : 0.12   |
| CV.min | 0.15  | 0.15            | 0.14             | 0.17        | <b>0.13</b>  | <b>0.14</b> |             |                                                                       |
| AICc   | 0.15  | 0.15            | 0.14             | 0.17        |              |             | <b>0.14</b> |                                                                       |
| AIC    | 0.15  | 0.14            | 0.14             | 0.17        |              |             |             |                                                                       |
| BIC    | 0.20  | 0.19            | 0.17             | 0.17        |              |             |             |                                                                       |
| CV.1se | 5.39  | 5.29            | 5.15             | 5.00        | 5.10         |             |             | $\text{sd}(\mu)/\sigma = 1$<br>$\rho = 0$<br><i>Oracle</i> : 4.70     |
| CV.min | 5.08  | 5.01            | 4.95             | 5.13        | <b>4.94</b>  | <b>4.95</b> |             |                                                                       |
| AICc   | 5.08  | 5.02            | 5.06             | 5.08        |              |             | 5.05        |                                                                       |
| AIC    | 7.41  | 7.50            | 8.01             | 5.27        |              |             |             |                                                                       |
| BIC    | 5.41  | 5.32            | 5.32             | 5.09        |              |             |             |                                                                       |
| CV.1se | 2.19  | 2.12            | 2.01             | 2.08        | 1.94         |             |             | $\text{sd}(\mu)/\sigma = 1$<br>$\rho = 0.5$<br><i>Oracle</i> : 1.77   |
| CV.min | 2.04  | 1.99            | 1.92             | 2.07        | <b>1.88</b>  | <b>1.92</b> |             |                                                                       |
| AICc   | 2.04  | 1.99            | 1.94             | 2.06        |              |             | 1.94        |                                                                       |
| AIC    | 2.69  | 2.72            | 2.89             | 2.07        |              |             |             |                                                                       |
| BIC    | 2.34  | 2.25            | 2.12             | 2.23        |              |             |             |                                                                       |
| CV.1se | 0.64  | 0.61            | 0.56             | 0.54        | 0.54         |             |             | $\text{sd}(\mu)/\sigma = 1$<br>$\rho = 0.9$<br><i>Oracle</i> : 0.48   |
| CV.min | 0.58  | 0.57            | 0.54             | <b>0.52</b> | 0.53         | 0.54        |             |                                                                       |
| AICc   | 0.58  | 0.57            | 0.55             | <b>0.52</b> |              |             | 0.57        |                                                                       |
| AIC    | 0.61  | 0.61            | 0.65             | <b>0.52</b> |              |             |             |                                                                       |
| BIC    | 0.69  | 0.68            | 0.68             | 0.54        |              |             |             |                                                                       |
| CV.1se | 20.93 | 20.70           | 20.51            | 19.70       | 20.35        |             |             | $\text{sd}(\mu)/\sigma = 0.5$<br>$\rho = 0$<br><i>Oracle</i> : 18.68  |
| CV.min | 19.78 | 19.65           | 19.69            | 20.92       | <b>19.64</b> | 19.66       |             |                                                                       |
| AICc   | 19.76 | 19.76           | 20.60            | 20.41       |              |             | 19.76       |                                                                       |
| AIC    | 31.66 | 32.29           | 34.25            | 24.31       |              |             |             |                                                                       |
| BIC    | 20.61 | 20.65           | 21.70            | 19.92       |              |             |             |                                                                       |
| CV.1se | 8.31  | 8.18            | 8.01             | 7.93        | 7.74         |             |             | $\text{sd}(\mu)/\sigma = 0.5$<br>$\rho = 0.5$<br><i>Oracle</i> : 7.04 |
| CV.min | 7.81  | 7.71            | 7.65             | 8.19        | <b>7.48</b>  | 7.65        |             |                                                                       |
| AICc   | 7.78  | 7.73            | 7.97             | 8.10        |              |             | 7.78        |                                                                       |
| AIC    | 11.66 | 11.85           | 12.62            | 8.89        |              |             |             |                                                                       |
| BIC    | 8.21  | 8.20            | 8.22             | 8.11        |              |             |             |                                                                       |
| CV.1se | 2.18  | 2.17            | 2.12             | 2.05        | 2.15         |             |             | $\text{sd}(\mu)/\sigma = 0.5$<br>$\rho = 0.9$<br><i>Oracle</i> : 1.91 |
| CV.min | 2.09  | 2.09            | 2.08             | <b>2.02</b> | 2.07         | 2.08        |             |                                                                       |
| AICc   | 2.09  | 2.09            | 2.08             | 2.03        |              |             | 2.08        |                                                                       |
| AIC    | 2.66  | 2.74            | 3.05             | 2.03        |              |             |             |                                                                       |
| BIC    | 2.10  | 2.09            | 2.08             | 2.07        |              |             |             |                                                                       |



Table 9: **Prediction MSE for n=1000, continuous design, dense covariates, and decay 50.**

|        | lasso         | GL $\gamma = 1$ | GL $\gamma = 10$ | AL     | MCP          | CVbest | ICbest |                                                                        |
|--------|---------------|-----------------|------------------|--------|--------------|--------|--------|------------------------------------------------------------------------|
| CV.lse | 8.89          | 8.75            | 8.73             | 8.62   | 8.46         |        |        | $\text{sd}(\mu)/\sigma = 2$<br>$\rho = 0$<br><i>Oracle</i> : 7.12      |
| CV.min | 8.29          | 8.15            | 8.22             | 8.31   | <b>8.07</b>  | 8.19   |        |                                                                        |
| AICc   | 8.58          | 8.33            | 8.21             | 8.36   |              |        | 8.23   |                                                                        |
| AIC    | 10.11         | 10.26           | 10.96            | 8.32   |              |        |        |                                                                        |
| BIC    | 11.38         | 10.69           | 10.16            | 9.86   |              |        |        |                                                                        |
| CV.lse | 3.36          | 3.26            | 3.14             | 3.80   | 3.02         |        |        | $\text{sd}(\mu)/\sigma = 2$<br>$\rho = 0.5$<br><i>Oracle</i> : 2.44    |
| CV.min | 3.10          | 3.02            | 2.95             | 3.53   | <b>2.89</b>  | 2.95   |        |                                                                        |
| AICc   | 3.36          | 3.18            | 2.92             | 3.60   |              |        | 2.91   |                                                                        |
| AIC    | 3.44          | 3.46            | 3.65             | 3.49   |              |        |        |                                                                        |
| BIC    | 7.68          | 5.31            | 3.78             | 5.59   |              |        |        |                                                                        |
| CV.lse | 0.63          | 0.61            | 0.58             | 1.17   | 0.56         |        |        | $\text{sd}(\mu)/\sigma = 2$<br>$\rho = 0.9$<br><i>Oracle</i> : 0.44    |
| CV.min | 0.59          | 0.57            | <b>0.55</b>      | 1.10   | <b>0.55</b>  | 0.55   |        |                                                                        |
| AICc   | 0.65          | 0.61            | <b>0.55</b>      | 1.10   |              |        | 0.55   |                                                                        |
| AIC    | 0.59          | 0.57            | 0.56             | 1.10   |              |        |        |                                                                        |
| BIC    | 1.67          | 1.66            | 1.65             | 1.25   |              |        |        |                                                                        |
| CV.lse | 34.06         | 33.85           | 34.98            | 31.42  | 32.94        |        |        | $\text{sd}(\mu)/\sigma = 1$<br>$\rho = 0$<br><i>Oracle</i> : 27.62     |
| CV.min | 31.34         | <b>31.26</b>    | 32.68            | 31.51  | 31.30        | 31.33  |        |                                                                        |
| AICc   | 31.83         | 31.40           | 33.52            | 31.27  |              |        | 31.50  |                                                                        |
| AIC    | 42.77         | 43.75           | 46.49            | 34.15  |              |        |        |                                                                        |
| BIC    | 42.03         | 40.64           | 48.29            | 35.76  |              |        |        |                                                                        |
| CV.lse | 13.53         | 12.89           | 13.06            | 12.68  | 11.78        |        |        | $\text{sd}(\mu)/\sigma = 1$<br>$\rho = 0.5$<br><i>Oracle</i> : 9.45    |
| CV.min | 11.81         | 11.55           | 11.96            | 12.24  | <b>11.26</b> | 11.61  |        |                                                                        |
| AICc   | 12.25         | 11.78           | 11.53            | 12.34  |              |        | 11.74  |                                                                        |
| AIC    | 14.53         | 14.78           | 15.67            | 12.45  |              |        |        |                                                                        |
| BIC    | 16.62         | 16.65           | 16.79            | 16.24  |              |        |        |                                                                        |
| CV.lse | 2.91          | 2.78            | 2.71             | 2.50   | 2.29         |        |        | $\text{sd}(\mu)/\sigma = 1$<br>$\rho = 0.9$<br><i>Oracle</i> : 1.72    |
| CV.min | 2.64          | 2.45            | 2.48             | 2.35   | <b>2.15</b>  | 2.39   |        |                                                                        |
| AICc   | 2.67          | 2.67            | 2.62             | 2.35   |              |        | 2.56   |                                                                        |
| AIC    | 2.29          | 2.32            | 2.52             | 2.34   |              |        |        |                                                                        |
| BIC    | 2.84          | 2.84            | 2.82             | 2.79   |              |        |        |                                                                        |
| CV.lse | 122.32        | 122.70          | 123.15           | 116.28 | 122.44       |        |        | $\text{sd}(\mu)/\sigma = 0.5$<br>$\rho = 0$<br><i>Oracle</i> : 107.15  |
| CV.min | 116.26        | 118.42          | 122.17           | 121.45 | 116.33       | 116.64 |        |                                                                        |
| AICc   | <b>115.83</b> | 118.96          | 123.27           | 118.51 |              |        | 115.82 |                                                                        |
| AIC    | 177.17        | 182.78          | 191.21           | 146.86 |              |        |        |                                                                        |
| BIC    | 123.05        | 123.19          | 123.26           | 121.93 |              |        |        |                                                                        |
| CV.lse | 42.16         | 42.17           | 42.17            | 41.75  | 42.16        |        |        | $\text{sd}(\mu)/\sigma = 0.5$<br>$\rho = 0.5$<br><i>Oracle</i> : 36.65 |
| CV.min | 41.82         | 41.91           | 42.11            | 43.03  | 41.82        | 41.85  |        |                                                                        |
| AICc   | <b>41.56</b>  | 42.03           | 42.18            | 42.51  |              |        | 41.59  |                                                                        |
| AIC    | 60.25         | 61.81           | 64.90            | 50.74  |              |        |        |                                                                        |
| BIC    | 42.13         | 42.15           | 42.17            | 42.06  |              |        |        |                                                                        |
| CV.lse | 7.70          | 7.69            | 7.67             | 7.60   | 7.70         |        |        | $\text{sd}(\mu)/\sigma = 0.5$<br>$\rho = 0.9$<br><i>Oracle</i> : 6.68  |
| CV.min | 7.50          | 7.49            | 7.47             | 7.50   | <b>7.46</b>  | 7.47   |        |                                                                        |
| AICc   | 7.49          | 7.51            | 7.49             | 7.52   |              |        | 7.48   |                                                                        |
| AIC    | 9.77          | 10.11           | 11.15            | 7.60   |              |        |        |                                                                        |
| BIC    | 7.53          | 7.54            | 7.54             | 7.48   |              |        |        |                                                                        |

Table 10: **Prediction MSE for n=1000, continuous design, dense covariates, and decay 100.**

|        | lasso         | GL $\gamma = 1$ | GL $\gamma = 10$ | AL           | MCP         | CVbest       | ICbest |                                                                        |
|--------|---------------|-----------------|------------------|--------------|-------------|--------------|--------|------------------------------------------------------------------------|
| CV.lse | 19.75         | 19.76           | 20.62            | 19.85        | 19.04       |              |        | $\text{sd}(\mu)/\sigma = 2$<br>$\rho = 0$<br><i>Oracle</i> : 15.73     |
| CV.min | 18.30         | 18.24           | 19.12            | 18.83        | <b>18.2</b> | 18.27        |        |                                                                        |
| AICc   | 19.91         | 19.17           | 18.81            | 19.30        |             |              | 18.89  |                                                                        |
| AIC    | 21.09         | 21.49           | 22.88            | 18.63        |             |              |        |                                                                        |
| BIC    | 46.55         | 33.24           | 24.57            | 27.18        |             |              |        |                                                                        |
| CV.lse | 7.50          | 7.32            | 7.19             | 9.12         | 7.09        |              |        | $\text{sd}(\mu)/\sigma = 2$<br>$\rho = 0.5$<br><i>Oracle</i> : 5.31    |
| CV.min | 6.74          | <b>6.63</b>     | 6.69             | 8.03         | 6.70        | 6.65         |        |                                                                        |
| AICc   | 8.11          | 7.40            | 6.65             | 8.66         |             |              | 6.65   |                                                                        |
| AIC    | 7.16          | 7.24            | 7.62             | 7.58         |             |              |        |                                                                        |
| BIC    | 20.78         | 20.81           | 17.61            | 20.27        |             |              |        |                                                                        |
| CV.lse | 1.32          | 1.28            | 1.23             | 2.70         | 1.26        |              |        | $\text{sd}(\mu)/\sigma = 2$<br>$\rho = 0.9$<br><i>Oracle</i> : 0.90    |
| CV.min | 1.18          | 1.16            | 1.15             | 2.39         | 1.19        | <b>1.15</b>  |        |                                                                        |
| AICc   | 1.51          | 1.32            | 1.16             | 2.40         |             |              | 1.16   |                                                                        |
| AIC    | 1.18          | <b>1.14</b>     | 1.15             | 2.36         |             |              |        |                                                                        |
| BIC    | 3.33          | 3.33            | 3.31             | 3.28         |             |              |        |                                                                        |
| CV.lse | 75.68         | 78.22           | 89.56            | 69.05        | 73.29       |              |        | $\text{sd}(\mu)/\sigma = 1$<br>$\rho = 0$<br><i>Oracle</i> : 59.71     |
| CV.min | <b>67.78</b>  | 69.59           | 80.16            | 68.33        | 67.80       | 67.97        |        |                                                                        |
| AICc   | 70.19         | 69.24           | 77.65            | 68.32        |             |              | 69.41  |                                                                        |
| AIC    | 87.75         | 90.22           | 95.25            | 73.65        |             |              |        |                                                                        |
| BIC    | 98.91         | 98.92           | 99.42            | 91.76        |             |              |        |                                                                        |
| CV.lse | 32.61         | 32.35           | 33.50            | 27.99        | 31.66       |              |        | $\text{sd}(\mu)/\sigma = 1$<br>$\rho = 0.5$<br><i>Oracle</i> : 20.16   |
| CV.min | 27.83         | 28.32           | 32.85            | 26.47        | 27.79       | 27.43        |        |                                                                        |
| AICc   | 28.71         | 27.60           | 27.00            | 27.01        |             |              | 27.97  |                                                                        |
| AIC    | 29.61         | 30.23           | 31.88            | <b>26.46</b> |             |              |        |                                                                        |
| BIC    | 33.51         | 33.54           | 33.58            | 33.30        |             |              |        |                                                                        |
| CV.lse | 5.69          | 5.68            | 5.64             | 5.37         | 5.66        |              |        | $\text{sd}(\mu)/\sigma = 1$<br>$\rho = 0.9$<br><i>Oracle</i> : 3.43    |
| CV.min | 5.46          | 5.44            | 5.46             | 4.96         | 5.37        | 5.43         |        |                                                                        |
| AICc   | 5.41          | 5.49            | 5.47             | 4.92         |             |              | 5.42   |                                                                        |
| AIC    | <b>4.51</b>   | 4.59            | 5.00             | 4.75         |             |              |        |                                                                        |
| BIC    | 5.51          | 5.51            | 5.48             | 5.47         |             |              |        |                                                                        |
| CV.lse | 248.48        | 248.75          | 248.83           | 240.83       | 248.64      |              |        | $\text{sd}(\mu)/\sigma = 0.5$<br>$\rho = 0$<br><i>Oracle</i> : 225.74  |
| CV.min | 241.25        | 246.89          | 248.80           | 251.00       | 241.20      | 241.96       |        |                                                                        |
| AICc   | <b>239.87</b> | 247.57          | 248.98           | 244.78       |             |              | 239.94 |                                                                        |
| AIC    | 359.81        | 373.33          | 388.16           | 305.32       |             |              |        |                                                                        |
| BIC    | 248.75        | 248.83          | 260.38           | 248.16       |             |              |        |                                                                        |
| CV.lse | 84.04         | 84.04           | 84.04            | 83.70        | 84.04       |              |        | $\text{sd}(\mu)/\sigma = 0.5$<br>$\rho = 0.5$<br><i>Oracle</i> : 76.23 |
| CV.min | 83.75         | 83.95           | 84.07            | 86.35        | 83.78       | 83.79        |        |                                                                        |
| AICc   | <b>83.45</b>  | 84.01           | 84.08            | 85.29        |             |              | 83.43  |                                                                        |
| AIC    | 120.66        | 124.51          | 130.20           | 103.48       |             |              |        |                                                                        |
| BIC    | 84.03         | 84.04           | 84.04            | 83.99        |             |              |        |                                                                        |
| CV.lse | 14.33         | 14.33           | 14.33            | 14.29        | 14.34       |              |        | $\text{sd}(\mu)/\sigma = 0.5$<br>$\rho = 0.9$<br><i>Oracle</i> : 12.97 |
| CV.min | 14.17         | 14.16           | 14.17            | 14.21        | 14.15       | <b>14.15</b> |        |                                                                        |
| AICc   | <b>14.13</b>  | 14.20           | 14.25            | 14.25        |             |              | 14.14  |                                                                        |
| AIC    | 18.82         | 19.62           | 21.33            | 14.53        |             |              |        |                                                                        |
| BIC    | 14.23         | 14.25           | 14.31            | 14.17        |             |              |        |                                                                        |

Table 11: **Prediction MSE for n=1000, continuous design, dense covariates, and decay 200.**

|        | lasso         | GL $\gamma = 1$ | GL $\gamma = 10$ | AL           | MCP          | CVbest       | ICbest |                                                                         |
|--------|---------------|-----------------|------------------|--------------|--------------|--------------|--------|-------------------------------------------------------------------------|
| CV.lse | 44.42         | 46.71           | 56.79            | 46.06        | 42.76        |              |        | $\text{sd}(\mu)/\sigma = 2$<br>$\rho = 0$<br><i>Oracle</i> : 36.05      |
| CV.min | 40.06         | 41.17           | 46.59            | 42.63        | <b>39.87</b> | 40.10        |        |                                                                         |
| AICc   | 49.74         | 45.58           | 43.24            | 45.76        |              |              | 44.27  |                                                                         |
| AIC    | 43.49         | 44.52           | 47.03            | 41.20        |              |              |        |                                                                         |
| BIC    | 124.28        | 124.46          | 72.81            | 114.38       |              |              |        |                                                                         |
| CV.lse | 20.11         | 21.43           | 39.27            | 23.34        | 19.23        |              |        | $\text{sd}(\mu)/\sigma = 2$<br>$\rho = 0.5$<br><i>Oracle</i> : 12.09    |
| CV.min | 15.20         | 15.65           | 34.29            | 19.50        | 15.17        | 15.14        |        |                                                                         |
| AICc   | 26.86         | 19.33           | 15.30            | 22.13        |              |              | 15.30  |                                                                         |
| AIC    | <b>14.76</b>  | 14.97           | 15.68            | 16.30        |              |              |        |                                                                         |
| BIC    | 41.76         | 41.80           | 41.06            | 41.46        |              |              |        |                                                                         |
| CV.lse | 5.61          | 5.64            | 6.78             | 6.32         | 6.14         |              |        | $\text{sd}(\mu)/\sigma = 2$<br>$\rho = 0.9$<br><i>Oracle</i> : 1.98     |
| CV.min | 4.01          | 4.16            | 6.49             | 5.32         | 4.91         | 3.73         |        |                                                                         |
| AICc   | 6.40          | 6.11            | 2.57             | 5.28         |              |              | 2.57   |                                                                         |
| AIC    | 2.40          | <b>2.37</b>     | 2.43             | 4.53         |              |              |        |                                                                         |
| BIC    | 6.66          | 6.66            | 6.64             | 6.60         |              |              |        |                                                                         |
| CV.lse | 169.30        | 187.88          | 199.29           | 149.02       | 165.35       |              |        | $\text{sd}(\mu)/\sigma = 1$<br>$\rho = 0$<br><i>Oracle</i> : 131.43     |
| CV.min | <b>145.46</b> | 163.65          | 195.22           | 145.76       | 145.47       | 145.65       |        |                                                                         |
| AICc   | 155.35        | 149.68          | 176.34           | 147.26       |              |              | 151.51 |                                                                         |
| AIC    | 178.00        | 184.00          | 193.01           | 154.99       |              |              |        |                                                                         |
| BIC    | 199.52        | 199.72          | 199.19           | 197.28       |              |              |        |                                                                         |
| CV.lse | 66.93         | 67.00           | 67.02            | 59.80        | 66.97        |              |        | $\text{sd}(\mu)/\sigma = 1$<br>$\rho = 0.5$<br><i>Oracle</i> : 44.09    |
| CV.min | 64.04         | 65.70           | 66.87            | 55.90        | 63.97        | 64.09        |        |                                                                         |
| AICc   | 63.18         | 65.26           | 63.30            | 57.33        |              |              | 63.14  |                                                                         |
| AIC    | 59.68         | 61.25           | 64.28            | <b>54.73</b> |              |              |        |                                                                         |
| BIC    | 66.99         | 67.02           | 67.02            | 66.86        |              |              |        |                                                                         |
| CV.lse | 11.00         | 11.00           | 10.99            | 10.89        | 11.01        |              |        | $\text{sd}(\mu)/\sigma = 1$<br>$\rho = 0.9$<br><i>Oracle</i> : 7.22     |
| CV.min | 10.74         | 10.74           | 10.76            | 10.35        | 10.73        | 10.72        |        |                                                                         |
| AICc   | 10.65         | 10.82           | 10.84            | 10.27        |              |              | 10.65  |                                                                         |
| AIC    | <b>9.05</b>   | 9.31            | 10.04            | 9.44         |              |              |        |                                                                         |
| BIC    | 10.86         | 10.87           | 10.92            | 10.78        |              |              |        |                                                                         |
| CV.lse | 499.75        | 499.92          | 499.94           | 490.79       | 499.87       |              |        | $\text{sd}(\mu)/\sigma = 0.5$<br>$\rho = 0$<br><i>Oracle</i> : 476.83   |
| CV.min | 491.34        | 499.45          | 500.31           | 511.49       | 491.87       | 492.40       |        |                                                                         |
| AICc   | <b>488.97</b> | 501.61          | 499.93           | 498.68       |              |              | 488.93 |                                                                         |
| AIC    | 725.13        | 757.08          | 782.66           | 623.41       |              |              |        |                                                                         |
| BIC    | 499.85        | 499.93          | 702.82           | 499.40       |              |              |        |                                                                         |
| CV.lse | 167.73        | 167.73          | 167.73           | 167.37       | 167.73       |              |        | $\text{sd}(\mu)/\sigma = 0.5$<br>$\rho = 0.5$<br><i>Oracle</i> : 159.94 |
| CV.min | 167.35        | 167.70          | 167.82           | 172.56       | 167.40       | 167.48       |        |                                                                         |
| AICc   | <b>166.89</b> | 167.74          | 167.73           | 170.57       |              |              | 166.89 |                                                                         |
| AIC    | 241.13        | 250.55          | 260.98           | 208.44       |              |              |        |                                                                         |
| BIC    | 167.72        | 167.73          | 169.58           | 167.68       |              |              |        |                                                                         |
| CV.lse | 27.55         | 27.55           | 27.55            | 27.53        | 27.55        |              |        | $\text{sd}(\mu)/\sigma = 0.5$<br>$\rho = 0.9$<br><i>Oracle</i> : 26.20  |
| CV.min | 27.44         | 27.45           | 27.50            | 27.54        | 27.44        | <b>27.44</b> |        |                                                                         |
| AICc   | <b>27.39</b>  | 27.50           | 27.54            | 27.60        |              |              | 27.39  |                                                                         |
| AIC    | 36.95         | 38.80           | 41.67            | 28.31        |              |              |        |                                                                         |
| BIC    | 27.52         | 27.53           | 27.55            | 27.47        |              |              |        |                                                                         |

Table 12: **Prediction MSE for n=1000, binary design, sparse covariates, and decay 10.**

|        | lasso | GL $\gamma = 1$ | GL $\gamma = 10$ | AL   | MCP         | CVbest      | ICbest |                                                                       |
|--------|-------|-----------------|------------------|------|-------------|-------------|--------|-----------------------------------------------------------------------|
| CV.1se | 0.34  | 0.34            | 0.33             | 0.33 | 0.32        |             |        | $\text{sd}(\mu)/\sigma = 2$<br>$\rho = 0$<br><i>Oracle</i> : 0.31     |
| CV.min | 0.32  | 0.32            | <b>0.31</b>      | 0.32 | <b>0.31</b> | 0.31        |        |                                                                       |
| AICc   | 0.32  | 0.32            | <b>0.31</b>      | 0.32 |             |             | 0.31   |                                                                       |
| AIC    | 0.42  | 0.42            | 0.45             | 0.32 |             |             |        |                                                                       |
| BIC    | 0.35  | 0.34            | 0.32             | 0.33 |             |             |        |                                                                       |
| CV.1se | 0.31  | 0.30            | 0.29             | 0.30 | 0.29        |             |        | $\text{sd}(\mu)/\sigma = 2$<br>$\rho = 0.5$<br><i>Oracle</i> : 0.28   |
| CV.min | 0.29  | 0.29            | <b>0.28</b>      | 0.29 | <b>0.28</b> | 0.28        |        |                                                                       |
| AICc   | 0.29  | 0.29            | <b>0.28</b>      | 0.29 |             |             | 0.28   |                                                                       |
| AIC    | 0.37  | 0.38            | 0.40             | 0.29 |             |             |        |                                                                       |
| BIC    | 0.32  | 0.31            | 0.29             | 0.30 |             |             |        |                                                                       |
| CV.1se | 0.29  | 0.29            | 0.28             | 0.28 | 0.27        |             |        | $\text{sd}(\mu)/\sigma = 2$<br>$\rho = 0.9$<br><i>Oracle</i> : 0.26   |
| CV.min | 0.28  | 0.27            | <b>0.26</b>      | 0.27 | <b>0.26</b> | 0.26        |        |                                                                       |
| AICc   | 0.28  | 0.27            | <b>0.26</b>      | 0.27 |             |             | 0.26   |                                                                       |
| AIC    | 0.35  | 0.35            | 0.37             | 0.27 |             |             |        |                                                                       |
| BIC    | 0.30  | 0.29            | 0.27             | 0.28 |             |             |        |                                                                       |
| CV.1se | 1.34  | 1.32            | 1.29             | 1.25 | 1.27        |             |        | $\text{sd}(\mu)/\sigma = 1$<br>$\rho = 0$<br><i>Oracle</i> : 1.24     |
| CV.min | 1.26  | 1.25            | <b>1.23</b>      | 1.28 | <b>1.23</b> | 1.23        |        |                                                                       |
| AICc   | 1.26  | 1.25            | 1.27             | 1.27 |             |             | 1.27   |                                                                       |
| AIC    | 1.85  | 1.87            | 2.00             | 1.31 |             |             |        |                                                                       |
| BIC    | 1.35  | 1.31            | 1.29             | 1.27 |             |             |        |                                                                       |
| CV.1se | 1.21  | 1.18            | 1.15             | 1.12 | 1.13        |             |        | $\text{sd}(\mu)/\sigma = 1$<br>$\rho = 0.5$<br><i>Oracle</i> : 1.11   |
| CV.min | 1.14  | 1.12            | <b>1.1</b>       | 1.15 | <b>1.1</b>  | 1.10        |        |                                                                       |
| AICc   | 1.14  | 1.12            | 1.13             | 1.14 |             |             | 1.13   |                                                                       |
| AIC    | 1.65  | 1.67            | 1.78             | 1.18 |             |             |        |                                                                       |
| BIC    | 1.22  | 1.18            | 1.15             | 1.14 |             |             |        |                                                                       |
| CV.1se | 1.14  | 1.12            | 1.09             | 1.06 | 1.07        |             |        | $\text{sd}(\mu)/\sigma = 1$<br>$\rho = 0.9$<br><i>Oracle</i> : 1.05   |
| CV.min | 1.08  | 1.06            | <b>1.04</b>      | 1.08 | <b>1.04</b> | 1.05        |        |                                                                       |
| AICc   | 1.08  | 1.06            | 1.07             | 1.08 |             |             | 1.07   |                                                                       |
| AIC    | 1.55  | 1.57            | 1.68             | 1.11 |             |             |        |                                                                       |
| BIC    | 1.16  | 1.12            | 1.09             | 1.09 |             |             |        |                                                                       |
| CV.1se | 5.21  | 5.16            | 5.11             | 4.90 | 5.07        |             |        | $\text{sd}(\mu)/\sigma = 0.5$<br>$\rho = 0$<br><i>Oracle</i> : 4.98   |
| CV.min | 4.93  | <b>4.89</b>     | 4.90             | 5.20 | <b>4.89</b> | 4.90        |        |                                                                       |
| AICc   | 4.92  | <b>4.89</b>     | 5.17             | 5.08 |             |             | 4.97   |                                                                       |
| AIC    | 7.90  | 8.06            | 8.55             | 6.07 |             |             |        |                                                                       |
| BIC    | 5.14  | 5.09            | 5.21             | 4.96 |             |             |        |                                                                       |
| CV.1se | 4.68  | 4.62            | 4.56             | 4.39 | 4.53        |             |        | $\text{sd}(\mu)/\sigma = 0.5$<br>$\rho = 0.5$<br><i>Oracle</i> : 4.44 |
| CV.min | 4.42  | 4.38            | 4.38             | 4.67 | <b>4.37</b> | 4.37        |        |                                                                       |
| AICc   | 4.41  | 4.38            | 4.62             | 4.55 |             |             | 4.46   |                                                                       |
| AIC    | 7.06  | 7.19            | 7.62             | 5.44 |             |             |        |                                                                       |
| BIC    | 4.62  | 4.57            | 4.64             | 4.46 |             |             |        |                                                                       |
| CV.1se | 4.43  | 4.38            | 4.33             | 4.17 | 4.28        |             |        | $\text{sd}(\mu)/\sigma = 0.5$<br>$\rho = 0.9$<br><i>Oracle</i> : 4.20 |
| CV.min | 4.18  | 4.15            | 4.16             | 4.40 | <b>4.13</b> | <b>4.15</b> |        |                                                                       |
| AICc   | 4.18  | 4.15            | 4.38             | 4.31 |             |             | 4.23   |                                                                       |
| AIC    | 6.65  | 6.78            | 7.20             | 5.08 |             |             |        |                                                                       |
| BIC    | 4.39  | 4.34            | 4.40             | 4.23 |             |             |        |                                                                       |

Table 13: Prediction MSE for n=1000, binary design, sparse covariates, and decay 50.

|        | lasso        | GL $\gamma = 1$ | GL $\gamma = 10$ | AL    | MCP         | CVbest      | ICbest       |                                                                        |
|--------|--------------|-----------------|------------------|-------|-------------|-------------|--------------|------------------------------------------------------------------------|
| CV.lse | 2.11         | 2.06            | 2.02             | 2.04  | 1.97        |             |              | $\text{sd}(\mu)/\sigma = 2$<br>$\rho = 0$<br><i>Oracle</i> : 1.66      |
| CV.min | 1.98         | 1.93            | 1.91             | 1.97  | <b>1.89</b> | <b>1.91</b> |              |                                                                        |
| AICc   | 2.03         | 1.95            | 1.93             | 1.98  |             |             | 1.93         |                                                                        |
| AIC    | 2.47         | 2.50            | 2.68             | 1.98  |             |             |              |                                                                        |
| BIC    | 2.59         | 2.38            | 2.18             | 2.29  |             |             |              |                                                                        |
| CV.lse | 1.90         | 1.85            | 1.81             | 1.85  | 1.76        |             |              | $\text{sd}(\mu)/\sigma = 2$<br>$\rho = 0.5$<br><i>Oracle</i> : 1.47    |
| CV.min | 1.78         | 1.73            | 1.71             | 1.78  | <b>1.69</b> | <b>1.71</b> |              |                                                                        |
| AICc   | 1.83         | 1.76            | 1.71             | 1.79  |             |             | 1.72         |                                                                        |
| AIC    | 2.20         | 2.23            | 2.38             | 1.79  |             |             |              |                                                                        |
| BIC    | 2.40         | 2.19            | 1.95             | 2.12  |             |             |              |                                                                        |
| CV.lse | 1.79         | 1.74            | 1.70             | 1.76  | 1.65        |             |              | $\text{sd}(\mu)/\sigma = 2$<br>$\rho = 0.9$<br><i>Oracle</i> : 1.38    |
| CV.min | 1.68         | 1.64            | 1.61             | 1.69  | <b>1.59</b> | 1.62        |              |                                                                        |
| AICc   | 1.73         | 1.66            | 1.62             | 1.70  |             |             | 1.62         |                                                                        |
| AIC    | 2.07         | 2.09            | 2.23             | 1.69  |             |             |              |                                                                        |
| BIC    | 2.28         | 2.08            | 1.84             | 2.02  |             |             |              |                                                                        |
| CV.lse | 8.24         | 8.17            | 8.39             | 7.62  | 7.95        |             |              | $\text{sd}(\mu)/\sigma = 1$<br>$\rho = 0$<br><i>Oracle</i> : 6.62      |
| CV.min | 7.60         | 7.57            | 7.86             | 7.64  | 7.58        | 7.60        |              |                                                                        |
| AICc   | 7.69         | <b>7.54</b>     | 8.30             | 7.58  |             |             | 8.08         |                                                                        |
| AIC    | 10.46        | 10.70           | 11.38            | 8.30  |             |             |              |                                                                        |
| BIC    | 10.06        | 9.29            | 10.18            | 8.59  |             |             |              |                                                                        |
| CV.lse | 7.42         | 7.33            | 7.47             | 6.86  | 7.11        |             |              | $\text{sd}(\mu)/\sigma = 1$<br>$\rho = 0.5$<br><i>Oracle</i> : 5.88    |
| CV.min | 6.82         | 6.77            | 6.99             | 6.87  | 6.78        | 6.79        |              |                                                                        |
| AICc   | 6.92         | <b>6.76</b>     | 7.35             | 6.82  |             |             | 7.26         |                                                                        |
| AIC    | 9.31         | 9.51            | 10.10            | 7.46  |             |             |              |                                                                        |
| BIC    | 9.38         | 8.53            | 9.14             | 7.86  |             |             |              |                                                                        |
| CV.lse | 6.99         | 6.92            | 7.11             | 6.51  | 6.71        |             |              | $\text{sd}(\mu)/\sigma = 1$<br>$\rho = 0.9$<br><i>Oracle</i> : 5.54    |
| CV.min | 6.44         | 6.39            | 6.65             | 6.49  | 6.40        | 6.41        |              |                                                                        |
| AICc   | 6.54         | <b>6.38</b>     | 6.88             | 6.46  |             |             | 6.83         |                                                                        |
| AIC    | 8.75         | 8.94            | 9.50             | 7.00  |             |             |              |                                                                        |
| BIC    | 8.98         | 8.13            | 8.69             | 7.50  |             |             |              |                                                                        |
| CV.lse | 29.81        | 29.91           | 30.03            | 28.31 | 29.84       |             |              | $\text{sd}(\mu)/\sigma = 0.5$<br>$\rho = 0$<br><i>Oracle</i> : 26.48   |
| CV.min | 28.31        | 28.88           | 29.78            | 29.60 | 28.34       | 28.39       |              |                                                                        |
| AICc   | <b>28.2</b>  | 28.41           | 31.56            | 28.90 |             |             | 28.40        |                                                                        |
| AIC    | 43.35        | 44.71           | 46.79            | 35.84 |             |             |              |                                                                        |
| BIC    | 30.01        | 29.97           | 30.07            | 29.69 |             |             |              |                                                                        |
| CV.lse | 26.57        | 26.62           | 26.70            | 25.36 | 26.60       |             |              | $\text{sd}(\mu)/\sigma = 0.5$<br>$\rho = 0.5$<br><i>Oracle</i> : 23.53 |
| CV.min | 25.38        | 25.82           | 26.53            | 26.50 | 25.42       | 25.44       |              |                                                                        |
| AICc   | <b>25.25</b> | 25.38           | 28.50            | 25.87 |             |             | 25.38        |                                                                        |
| AIC    | 38.55        | 39.72           | 41.54            | 32.20 |             |             |              |                                                                        |
| BIC    | 26.68        | 26.67           | 26.72            | 26.49 |             |             |              |                                                                        |
| CV.lse | 25.05        | 25.11           | 25.16            | 23.99 | 25.10       |             |              | $\text{sd}(\mu)/\sigma = 0.5$<br>$\rho = 0.9$<br><i>Oracle</i> : 22.16 |
| CV.min | 23.95        | 24.36           | 25.01            | 24.95 | 23.99       | 24.03       |              |                                                                        |
| AICc   | <b>23.85</b> | 23.94           | 26.63            | 24.43 |             |             | <b>23.94</b> |                                                                        |
| AIC    | 36.24        | 37.35           | 39.09            | 30.06 |             |             |              |                                                                        |
| BIC    | 25.15        | 25.13           | 25.18            | 24.98 |             |             |              |                                                                        |

Table 14: **Prediction MSE for n=1000, binary design, sparse covariates, and decay 100.**

|        | lasso        | GL $\gamma = 1$ | GL $\gamma = 10$ | AL    | MCP          | CVbest       | ICbest |                                                                        |
|--------|--------------|-----------------|------------------|-------|--------------|--------------|--------|------------------------------------------------------------------------|
| CV.lse | 3.76         | 3.61            | 3.36             | 3.65  | 3.30         |              |        | $\text{sd}(\mu)/\sigma = 2$<br>$\rho = 0$<br><i>Oracle</i> : 2.94      |
| CV.min | 3.56         | 3.43            | <b>3.26</b>      | 3.53  | <b>3.26</b>  | 3.28         |        |                                                                        |
| AICc   | 3.67         | 3.47            | 3.35             | 3.55  |              |              | 3.36   |                                                                        |
| AIC    | 4.47         | 4.55            | 4.87             | 3.57  |              |              |        |                                                                        |
| BIC    | 4.59         | 4.06            | 3.62             | 4.07  |              |              |        |                                                                        |
| CV.lse | 3.38         | 3.23            | 2.98             | 3.31  | 2.91         |              |        | $\text{sd}(\mu)/\sigma = 2$<br>$\rho = 0.5$<br><i>Oracle</i> : 2.61    |
| CV.min | 3.20         | 3.08            | 2.90             | 3.20  | <b>2.88</b>  | 2.90         |        |                                                                        |
| AICc   | 3.30         | 3.11            | 2.98             | 3.23  |              |              | 2.98   |                                                                        |
| AIC    | 3.98         | 4.05            | 4.32             | 3.23  |              |              |        |                                                                        |
| BIC    | 4.23         | 3.69            | 3.20             | 3.78  |              |              |        |                                                                        |
| CV.lse | 3.18         | 3.04            | 2.83             | 3.16  | 2.76         |              |        | $\text{sd}(\mu)/\sigma = 2$<br>$\rho = 0.9$<br><i>Oracle</i> : 2.46    |
| CV.min | 3.02         | 2.91            | 2.75             | 3.04  | <b>2.72</b>  | 2.76         |        |                                                                        |
| AICc   | 3.12         | 2.94            | 2.81             | 3.07  |              |              | 2.81   |                                                                        |
| AIC    | 3.74         | 3.81            | 4.07             | 3.06  |              |              |        |                                                                        |
| BIC    | 4.04         | 3.51            | 3.04             | 3.63  |              |              |        |                                                                        |
| CV.lse | 15.29        | 15.35           | 16.83            | 14.13 | 14.78        |              |        | $\text{sd}(\mu)/\sigma = 1$<br>$\rho = 0$<br><i>Oracle</i> : 11.78     |
| CV.min | 13.96        | 14.04           | 15.26            | 14.06 | <b>13.95</b> | 13.98        |        |                                                                        |
| AICc   | 14.24        | 13.96           | 15.45            | 14.00 |              |              | 14.51  |                                                                        |
| AIC    | 18.83        | 19.34           | 20.48            | 15.33 |              |              |        |                                                                        |
| BIC    | 21.17        | 19.98           | 21.18            | 17.90 |              |              |        |                                                                        |
| CV.lse | 13.82        | 13.84           | 15.21            | 12.77 | 13.33        |              |        | $\text{sd}(\mu)/\sigma = 1$<br>$\rho = 0.5$<br><i>Oracle</i> : 10.46   |
| CV.min | 12.54        | 12.58           | 13.66            | 12.68 | 12.53        | 12.54        |        |                                                                        |
| AICc   | 12.85        | <b>12.52</b>    | 13.71            | 12.65 |              |              | 13.25  |                                                                        |
| AIC    | 16.74        | 17.18           | 18.16            | 13.77 |              |              |        |                                                                        |
| BIC    | 18.86        | 18.33           | 18.89            | 16.72 |              |              |        |                                                                        |
| CV.lse | 13.02        | 13.04           | 14.46            | 12.13 | 12.59        |              |        | $\text{sd}(\mu)/\sigma = 1$<br>$\rho = 0.9$<br><i>Oracle</i> : 9.86    |
| CV.min | 11.84        | 11.86           | 13.02            | 12.00 | 11.83        | <b>11.83</b> |        |                                                                        |
| AICc   | 12.15        | <b>11.82</b>    | 12.94            | 11.98 |              |              | 12.53  |                                                                        |
| AIC    | 15.75        | 16.16           | 17.10            | 12.95 |              |              |        |                                                                        |
| BIC    | 17.80        | 17.37           | 17.79            | 16.04 |              |              |        |                                                                        |
| CV.lse | 53.36        | 53.48           | 53.51            | 51.35 | 53.41        |              |        | $\text{sd}(\mu)/\sigma = 0.5$<br>$\rho = 0$<br><i>Oracle</i> : 47.14   |
| CV.min | 51.39        | 52.79           | 53.45            | 53.56 | 51.43        | 51.55        |        |                                                                        |
| AICc   | <b>51.14</b> | 52.09           | 55.86            | 52.29 |              |              | 51.95  |                                                                        |
| AIC    | 77.50        | 80.32           | 83.64            | 65.12 |              |              |        |                                                                        |
| BIC    | 53.49        | 53.50           | 53.52            | 53.31 |              |              |        |                                                                        |
| CV.lse | 47.42        | 47.49           | 47.51            | 45.88 | 47.46        |              |        | $\text{sd}(\mu)/\sigma = 0.5$<br>$\rho = 0.5$<br><i>Oracle</i> : 41.82 |
| CV.min | 46.02        | 46.99           | 47.48            | 47.86 | 46.06        | 46.14        |        |                                                                        |
| AICc   | <b>45.75</b> | 46.41           | 50.02            | 46.73 |              |              | 46.29  |                                                                        |
| AIC    | 68.81        | 71.22           | 74.17            | 58.32 |              |              |        |                                                                        |
| BIC    | 47.49        | 47.49           | 47.51            | 47.37 |              |              |        |                                                                        |
| CV.lse | 44.74        | 44.79           | 44.80            | 43.44 | 44.78        |              |        | $\text{sd}(\mu)/\sigma = 0.5$<br>$\rho = 0.9$<br><i>Oracle</i> : 39.43 |
| CV.min | 43.47        | 44.38           | 44.80            | 45.16 | 43.50        | 43.59        |        |                                                                        |
| AICc   | <b>43.18</b> | 43.79           | 46.92            | 44.14 |              |              | 43.66  |                                                                        |
| AIC    | 64.73        | 67.04           | 69.87            | 54.55 |              |              |        |                                                                        |
| BIC    | 44.79        | 44.79           | 44.81            | 44.69 |              |              |        |                                                                        |

Table 15: **Prediction MSE for n=1000, binary design, sparse covariates, and decay 200.**

|        | lasso        | GL $\gamma = 1$ | GL $\gamma = 10$ | AL    | MCP          | CVbest       | ICbest |                                                                        |
|--------|--------------|-----------------|------------------|-------|--------------|--------------|--------|------------------------------------------------------------------------|
| CV.lse | 5.50         | 5.19            | 4.63             | 5.29  | 4.56         |              |        | $\text{sd}(\mu)/\sigma = 2$<br>$\rho = 0$<br><i>Oracle</i> : 4.33      |
| CV.min | 5.24         | 4.99            | 4.60             | 5.13  | <b>4.55</b>  | 4.60         |        |                                                                        |
| AICc   | 5.39         | 5.03            | 4.76             | 5.16  |              |              | 4.75   |                                                                        |
| AIC    | 6.62         | 6.76            | 7.25             | 5.24  |              |              |        |                                                                        |
| BIC    | 6.47         | 5.65            | 4.98             | 5.74  |              |              |        |                                                                        |
| CV.lse | 4.93         | 4.64            | 4.09             | 4.81  | 4.01         |              |        | $\text{sd}(\mu)/\sigma = 2$<br>$\rho = 0.5$<br><i>Oracle</i> : 3.84    |
| CV.min | 4.70         | 4.46            | 4.08             | 4.66  | <b>4</b>     | 4.08         |        |                                                                        |
| AICc   | 4.85         | 4.51            | 4.20             | 4.69  |              |              | 4.20   |                                                                        |
| AIC    | 5.89         | 6.00            | 6.43             | 4.73  |              |              |        |                                                                        |
| BIC    | 5.94         | 5.10            | 4.38             | 5.31  |              |              |        |                                                                        |
| CV.lse | 4.65         | 4.38            | 3.88             | 4.59  | 3.81         |              |        | $\text{sd}(\mu)/\sigma = 2$<br>$\rho = 0.9$<br><i>Oracle</i> : 3.62    |
| CV.min | 4.44         | 4.22            | 3.88             | 4.43  | <b>3.78</b>  | 3.88         |        |                                                                        |
| AICc   | 4.59         | 4.26            | 3.97             | 4.46  |              |              | 3.98   |                                                                        |
| AIC    | 5.54         | 5.65            | 6.05             | 4.49  |              |              |        |                                                                        |
| BIC    | 5.65         | 4.82            | 4.15             | 5.08  |              |              |        |                                                                        |
| CV.lse | 22.82        | 23.17           | 26.71            | 21.08 | 22.03        |              |        | $\text{sd}(\mu)/\sigma = 1$<br>$\rho = 0$<br><i>Oracle</i> : 17.32     |
| CV.min | <b>20.74</b> | 21.00           | 23.69            | 20.92 | <b>20.74</b> | 20.79        |        |                                                                        |
| AICc   | 21.25        | 20.81           | 23.26            | 20.86 |              |              | 21.08  |                                                                        |
| AIC    | 27.81        | 28.66           | 30.26            | 22.86 |              |              |        |                                                                        |
| BIC    | 31.33        | 30.68           | 31.31            | 28.86 |              |              |        |                                                                        |
| CV.lse | 20.66        | 20.93           | 24.44            | 19.07 | 19.93        |              |        | $\text{sd}(\mu)/\sigma = 1$<br>$\rho = 0.5$<br><i>Oracle</i> : 15.36   |
| CV.min | <b>18.64</b> | 18.82           | 21.57            | 18.87 | <b>18.64</b> | 18.66        |        |                                                                        |
| AICc   | 19.17        | 18.65           | 20.58            | 18.86 |              |              | 19.17  |                                                                        |
| AIC    | 24.70        | 25.42           | 26.82            | 20.50 |              |              |        |                                                                        |
| BIC    | 27.83        | 27.60           | 27.86            | 26.46 |              |              |        |                                                                        |
| CV.lse | 19.48        | 19.76           | 23.30            | 18.14 | 18.83        |              |        | $\text{sd}(\mu)/\sigma = 1$<br>$\rho = 0.9$<br><i>Oracle</i> : 14.49   |
| CV.min | 17.62        | 17.78           | 20.53            | 17.88 | <b>17.61</b> | <b>17.62</b> |        |                                                                        |
| AICc   | 18.13        | 17.63           | 19.45            | 17.89 |              |              | 18.14  |                                                                        |
| AIC    | 23.26        | 23.95           | 25.28            | 19.30 |              |              |        |                                                                        |
| BIC    | 26.26        | 26.12           | 26.29            | 25.22 |              |              |        |                                                                        |
| CV.lse | 78.47        | 78.59           | 78.62            | 75.90 | 78.53        |              |        | $\text{sd}(\mu)/\sigma = 0.5$<br>$\rho = 0$<br><i>Oracle</i> : 69.25   |
| CV.min | 76.00        | 78.08           | 78.62            | 79.15 | 76.01        | 76.19        |        |                                                                        |
| AICc   | <b>75.6</b>  | 77.89           | 81.00            | 77.21 |              |              | 77.52  |                                                                        |
| AIC    | 114.01       | 118.59          | 123.13           | 96.44 |              |              |        |                                                                        |
| BIC    | 78.59        | 78.61           | 78.62            | 78.42 |              |              |        |                                                                        |
| CV.lse | 69.71        | 69.78           | 69.79            | 67.79 | 69.75        |              |        | $\text{sd}(\mu)/\sigma = 0.5$<br>$\rho = 0.5$<br><i>Oracle</i> : 61.43 |
| CV.min | 68.02        | 69.44           | 69.81            | 70.68 | 68.07        | 68.17        |        |                                                                        |
| AICc   | <b>67.61</b> | 69.22           | 72.36            | 68.97 |              |              | 68.86  |                                                                        |
| AIC    | 101.21       | 105.15          | 109.20           | 86.21 |              |              |        |                                                                        |
| BIC    | 69.77        | 69.78           | 69.79            | 69.65 |              |              |        |                                                                        |
| CV.lse | 65.81        | 65.86           | 65.86            | 64.21 | 65.85        |              |        | $\text{sd}(\mu)/\sigma = 0.5$<br>$\rho = 0.9$<br><i>Oracle</i> : 57.96 |
| CV.min | 64.32        | 65.58           | 65.89            | 66.75 | 64.36        | 64.49        |        |                                                                        |
| AICc   | <b>63.9</b>  | 65.37           | 68.08            | 65.23 |              |              | 65.06  |                                                                        |
| AIC    | 95.28        | 99.04           | 102.94           | 80.65 |              |              |        |                                                                        |
| BIC    | 65.85        | 65.85           | 65.86            | 65.75 |              |              |        |                                                                        |

Table 16: **Prediction MSE for n=1000, continuous design, sparse covariates, and decay 10.**

|        | lasso | GL $\gamma = 1$ | GL $\gamma = 10$ | AL          | MCP          | CVbest      | ICbest      |                                                                       |
|--------|-------|-----------------|------------------|-------------|--------------|-------------|-------------|-----------------------------------------------------------------------|
| CV.lse | 1.38  | 1.35            | 1.31             | 1.32        | 1.28         |             |             | $\text{sd}(\mu)/\sigma = 2$<br>$\rho = 0$<br><i>Oracle</i> : 1.25     |
| CV.min | 1.30  | 1.28            | 1.25             | 1.27        | <b>1.24</b>  | <b>1.25</b> |             |                                                                       |
| AICc   | 1.30  | 1.28            | 1.27             | 1.27        |              |             | 1.27        |                                                                       |
| AIC    | 1.68  | 1.69            | 1.79             | 1.27        |              |             |             |                                                                       |
| BIC    | 1.42  | 1.37            | 1.32             | 1.32        |              |             |             |                                                                       |
| CV.lse | 0.56  | 0.55            | 0.51             | 0.61        | 0.49         |             |             | $\text{sd}(\mu)/\sigma = 2$<br>$\rho = 0.5$<br><i>Oracle</i> : 0.47   |
| CV.min | 0.53  | 0.51            | 0.49             | 0.59        | <b>0.47</b>  | <b>0.49</b> |             |                                                                       |
| AICc   | 0.53  | 0.52            | 0.49             | 0.59        |              |             | <b>0.49</b> |                                                                       |
| AIC    | 0.61  | 0.61            | 0.63             | 0.59        |              |             |             |                                                                       |
| BIC    | 0.64  | 0.60            | 0.54             | 0.61        |              |             |             |                                                                       |
| CV.lse | 0.16  | 0.15            | 0.14             | 0.17        | 0.14         |             |             | $\text{sd}(\mu)/\sigma = 2$<br>$\rho = 0.9$<br><i>Oracle</i> : 0.13   |
| CV.min | 0.15  | 0.15            | 0.14             | 0.17        | <b>0.13</b>  | <b>0.14</b> |             |                                                                       |
| AICc   | 0.15  | 0.15            | 0.14             | 0.17        |              |             | <b>0.14</b> |                                                                       |
| AIC    | 0.15  | 0.14            | 0.14             | 0.17        |              |             |             |                                                                       |
| BIC    | 0.20  | 0.19            | 0.17             | 0.17        |              |             |             |                                                                       |
| CV.lse | 5.39  | 5.29            | 5.15             | 5.00        | 5.10         |             |             | $\text{sd}(\mu)/\sigma = 1$<br>$\rho = 0$<br><i>Oracle</i> : 4.99     |
| CV.min | 5.08  | 5.01            | 4.95             | 5.13        | <b>4.94</b>  | <b>4.95</b> |             |                                                                       |
| AICc   | 5.08  | 5.02            | 5.06             | 5.08        |              |             | 5.05        |                                                                       |
| AIC    | 7.41  | 7.50            | 8.01             | 5.27        |              |             |             |                                                                       |
| BIC    | 5.42  | 5.32            | 5.32             | 5.09        |              |             |             |                                                                       |
| CV.lse | 2.19  | 2.12            | 2.01             | 2.08        | 1.94         |             |             | $\text{sd}(\mu)/\sigma = 1$<br>$\rho = 0.5$<br><i>Oracle</i> : 1.88   |
| CV.min | 2.04  | 1.99            | 1.92             | 2.07        | <b>1.88</b>  | <b>1.92</b> |             |                                                                       |
| AICc   | 2.04  | 1.99            | 1.94             | 2.06        |              |             | 1.94        |                                                                       |
| AIC    | 2.69  | 2.72            | 2.89             | 2.07        |              |             |             |                                                                       |
| BIC    | 2.34  | 2.25            | 2.12             | 2.23        |              |             |             |                                                                       |
| CV.lse | 0.64  | 0.61            | 0.56             | 0.54        | 0.54         |             |             | $\text{sd}(\mu)/\sigma = 1$<br>$\rho = 0.9$<br><i>Oracle</i> : 0.51   |
| CV.min | 0.58  | 0.57            | 0.54             | <b>0.52</b> | 0.53         | 0.54        |             |                                                                       |
| AICc   | 0.58  | 0.57            | 0.55             | <b>0.52</b> |              |             | 0.57        |                                                                       |
| AIC    | 0.61  | 0.61            | 0.65             | <b>0.52</b> |              |             |             |                                                                       |
| BIC    | 0.69  | 0.68            | 0.68             | 0.54        |              |             |             |                                                                       |
| CV.lse | 20.93 | 20.70           | 20.50            | 19.70       | 20.35        |             |             | $\text{sd}(\mu)/\sigma = 0.5$<br>$\rho = 0$<br><i>Oracle</i> : 19.97  |
| CV.min | 19.78 | 19.65           | 19.69            | 20.92       | <b>19.64</b> | 19.66       |             |                                                                       |
| AICc   | 19.76 | 19.76           | 20.60            | 20.41       |              |             | 19.76       |                                                                       |
| AIC    | 31.66 | 32.29           | 34.25            | 24.31       |              |             |             |                                                                       |
| BIC    | 20.61 | 20.65           | 21.70            | 19.91       |              |             |             |                                                                       |
| CV.lse | 8.31  | 8.18            | 8.01             | 7.93        | 7.74         |             |             | $\text{sd}(\mu)/\sigma = 0.5$<br>$\rho = 0.5$<br><i>Oracle</i> : 7.53 |
| CV.min | 7.82  | 7.71            | 7.66             | 8.19        | <b>7.48</b>  | 7.65        |             |                                                                       |
| AICc   | 7.78  | 7.74            | 7.98             | 8.10        |              |             | 7.78        |                                                                       |
| AIC    | 11.66 | 11.85           | 12.62            | 8.89        |              |             |             |                                                                       |
| BIC    | 8.22  | 8.21            | 8.22             | 8.12        |              |             |             |                                                                       |
| CV.lse | 2.18  | 2.17            | 2.12             | 2.05        | 2.15         |             |             | $\text{sd}(\mu)/\sigma = 0.5$<br>$\rho = 0.9$<br><i>Oracle</i> : 2.04 |
| CV.min | 2.09  | 2.09            | 2.08             | <b>2.02</b> | 2.07         | 2.08        |             |                                                                       |
| AICc   | 2.09  | 2.09            | 2.08             | 2.03        |              |             | 2.08        |                                                                       |
| AIC    | 2.66  | 2.74            | 3.05             | 2.03        |              |             |             |                                                                       |
| BIC    | 2.10  | 2.09            | 2.08             | 2.07        |              |             |             |                                                                       |



Table 17: **Prediction MSE for n=1000, continuous design, sparse covariates, and decay 50.**

|        | lasso         | GL $\gamma = 1$ | GL $\gamma = 10$ | AL     | MCP          | CVbest      | ICbest      |                                                                        |
|--------|---------------|-----------------|------------------|--------|--------------|-------------|-------------|------------------------------------------------------------------------|
| CV.lse | 8.47          | 8.27            | 8.11             | 8.19   | 7.90         |             |             | $\text{sd}(\mu)/\sigma = 2$<br>$\rho = 0$<br><i>Oracle : 6.65</i>      |
| CV.min | 7.94          | 7.76            | 7.67             | 7.92   | <b>7.61</b>  | 7.69        |             |                                                                        |
| AICc   | 8.15          | 7.88            | 7.74             | 7.95   |              |             | 7.76        |                                                                        |
| AIC    | 9.89          | 10.03           | 10.73            | 7.94   |              |             |             |                                                                        |
| BIC    | 10.42         | 9.81            | 9.31             | 9.16   |              |             |             |                                                                        |
| CV.lse | 3.20          | 3.09            | 2.93             | 3.63   | 2.81         |             |             | $\text{sd}(\mu)/\sigma = 2$<br>$\rho = 0.5$<br><i>Oracle : 2.28</i>    |
| CV.min | 2.98          | 2.89            | 2.78             | 3.38   | <b>2.71</b>  | 2.78        |             |                                                                        |
| AICc   | 3.18          | 3.01            | 2.76             | 3.44   |              |             | <b>2.76</b> |                                                                        |
| AIC    | 3.35          | 3.38            | 3.57             | 3.36   |              |             |             |                                                                        |
| BIC    | 6.83          | 4.77            | 3.50             | 5.19   |              |             |             |                                                                        |
| CV.lse | 0.61          | 0.59            | 0.55             | 1.14   | 0.53         |             |             | $\text{sd}(\mu)/\sigma = 2$<br>$\rho = 0.9$<br><i>Oracle : 0.42</i>    |
| CV.min | 0.57          | 0.55            | 0.53             | 1.08   | <b>0.52</b>  | <b>0.53</b> |             |                                                                        |
| AICc   | 0.62          | 0.58            | 0.53             | 1.08   |              |             | <b>0.53</b> |                                                                        |
| AIC    | 0.57          | 0.55            | 0.54             | 1.08   |              |             |             |                                                                        |
| BIC    | 1.64          | 1.64            | 1.59             | 1.21   |              |             |             |                                                                        |
| CV.lse | 33.07         | 32.79           | 33.77            | 30.55  | 31.94        |             |             | $\text{sd}(\mu)/\sigma = 1$<br>$\rho = 0$<br><i>Oracle : 26.59</i>     |
| CV.min | 30.50         | <b>30.37</b>    | 31.59            | 30.66  | 30.41        | 30.47       |             |                                                                        |
| AICc   | 30.93         | 30.49           | 32.44            | 30.41  |              |             | 30.59       |                                                                        |
| AIC    | 41.93         | 42.89           | 45.60            | 33.25  |              |             |             |                                                                        |
| BIC    | 40.50         | 39.02           | 47.09            | 34.53  |              |             |             |                                                                        |
| CV.lse | 13.10         | 12.48           | 12.58            | 12.37  | 11.41        |             |             | $\text{sd}(\mu)/\sigma = 1$<br>$\rho = 0.5$<br><i>Oracle : 9.11</i>    |
| CV.min | 11.51         | 11.24           | 11.59            | 11.95  | <b>10.93</b> | 11.30       |             |                                                                        |
| AICc   | 11.92         | 11.46           | 11.22            | 12.03  |              |             | 11.40       |                                                                        |
| AIC    | 14.26         | 14.50           | 15.38            | 12.16  |              |             |             |                                                                        |
| BIC    | 16.31         | 16.34           | 16.49            | 15.92  |              |             |             |                                                                        |
| CV.lse | 2.86          | 2.70            | 2.63             | 2.46   | 2.21         |             |             | $\text{sd}(\mu)/\sigma = 1$<br>$\rho = 0.9$<br><i>Oracle : 1.68</i>    |
| CV.min | 2.56          | 2.37            | 2.38             | 2.31   | <b>2.09</b>  | 2.31        |             |                                                                        |
| AICc   | 2.60          | 2.59            | 2.53             | 2.31   |              |             | 2.48        |                                                                        |
| AIC    | 2.26          | 2.28            | 2.48             | 2.30   |              |             |             |                                                                        |
| BIC    | 2.80          | 2.80            | 2.78             | 2.75   |              |             |             |                                                                        |
| CV.lse | 119.93        | 120.31          | 120.82           | 113.86 | 120.03       |             |             | $\text{sd}(\mu)/\sigma = 0.5$<br>$\rho = 0$<br><i>Oracle : 106.35</i>  |
| CV.min | 113.81        | 115.93          | 119.70           | 118.93 | 113.89       | 114.14      |             |                                                                        |
| AICc   | <b>113.42</b> | 116.46          | 120.93           | 116.06 |              |             | 113.39      |                                                                        |
| AIC    | 173.78        | 179.27          | 187.58           | 144.00 |              |             |             |                                                                        |
| BIC    | 120.69        | 120.84          | 120.92           | 119.52 |              |             |             |                                                                        |
| CV.lse | 41.42         | 41.42           | 41.42            | 40.99  | 41.42        |             |             | $\text{sd}(\mu)/\sigma = 0.5$<br>$\rho = 0.5$<br><i>Oracle : 36.43</i> |
| CV.min | 41.07         | 41.14           | 41.36            | 42.25  | 41.06        | 41.08       |             |                                                                        |
| AICc   | <b>40.82</b>  | 41.28           | 41.44            | 41.71  |              |             | 40.82       |                                                                        |
| AIC    | 59.16         | 60.69           | 63.73            | 49.77  |              |             |             |                                                                        |
| BIC    | 41.38         | 41.40           | 41.42            | 41.31  |              |             |             |                                                                        |
| CV.lse | 7.60          | 7.59            | 7.57             | 7.50   | 7.60         |             |             | $\text{sd}(\mu)/\sigma = 0.5$<br>$\rho = 0.9$<br><i>Oracle : 6.70</i>  |
| CV.min | 7.40          | 7.39            | 7.37             | 7.40   | <b>7.36</b>  | 7.37        |             |                                                                        |
| AICc   | 7.39          | 7.41            | 7.39             | 7.42   |              |             | 7.38        |                                                                        |
| AIC    | 9.64          | 9.97            | 11.00            | 7.50   |              |             |             |                                                                        |
| BIC    | 7.43          | 7.44            | 7.43             | 7.38   |              |             |             |                                                                        |

Table 18: **Prediction MSE for n=1000, continuous design, sparse covariates, and decay 100.**

|        | lasso         | GL $\gamma = 1$ | GL $\gamma = 10$ | AL     | MCP          | CVbest       | ICbest |                                                                        |
|--------|---------------|-----------------|------------------|--------|--------------|--------------|--------|------------------------------------------------------------------------|
| CV.lse | 15.10         | 14.47           | 13.52            | 14.64  | 13.24        |              |        | $\text{sd}(\mu)/\sigma = 2$<br>$\rho = 0$<br><i>Oracle</i> : 11.82     |
| CV.min | 14.30         | 13.80           | <b>13.11</b>     | 14.18  | 13.12        | 13.17        |        |                                                                        |
| AICc   | 14.72         | 14.01           | 13.45            | 14.25  |              |              | 13.53  |                                                                        |
| AIC    | 17.93         | 18.24           | 19.55            | 14.33  |              |              |        |                                                                        |
| BIC    | 18.30         | 16.69           | 14.97            | 16.28  |              |              |        |                                                                        |
| CV.lse | 5.57          | 5.26            | 4.71             | 6.67   | 4.41         |              |        | $\text{sd}(\mu)/\sigma = 2$<br>$\rho = 0.5$<br><i>Oracle</i> : 4.01    |
| CV.min | 5.32          | 5.06            | 4.65             | 6.10   | <b>4.39</b>  | 4.65         |        |                                                                        |
| AICc   | 5.67          | 5.23            | 4.64             | 6.35   |              |              | 4.64   |                                                                        |
| AIC    | 6.07          | 6.12            | 6.49             | 5.98   |              |              |        |                                                                        |
| BIC    | 17.96         | 17.51           | 5.13             | 16.69  |              |              |        |                                                                        |
| CV.lse | 1.01          | 0.96            | 0.86             | 2.24   | 0.82         |              |        | $\text{sd}(\mu)/\sigma = 2$<br>$\rho = 0.9$<br><i>Oracle</i> : 0.70    |
| CV.min | 0.97          | 0.92            | 0.85             | 2.01   | <b>0.81</b>  | 0.85         |        |                                                                        |
| AICc   | 1.06          | 0.97            | 0.85             | 2.02   |              |              | 0.85   |                                                                        |
| AIC    | 0.96          | 0.93            | 0.94             | 2.01   |              |              |        |                                                                        |
| BIC    | 2.91          | 2.92            | 2.88             | 2.82   |              |              |        |                                                                        |
| CV.lse | 61.30         | 61.63           | 67.80            | 56.69  | 59.40        |              |        | $\text{sd}(\mu)/\sigma = 1$<br>$\rho = 0$<br><i>Oracle</i> : 47.30     |
| CV.min | <b>56.03</b>  | 56.36           | 61.20            | 56.45  | 56.05        | 56.08        |        |                                                                        |
| AICc   | 57.25         | 56.51           | 61.22            | 56.21  |              |              | 56.57  |                                                                        |
| AIC    | 75.47         | 77.53           | 82.05            | 61.51  |              |              |        |                                                                        |
| BIC    | 85.09         | 84.04           | 85.85            | 71.78  |              |              |        |                                                                        |
| CV.lse | 26.22         | 25.20           | 28.27            | 23.25  | 23.48        |              |        | $\text{sd}(\mu)/\sigma = 1$<br>$\rho = 0.5$<br><i>Oracle</i> : 16.04   |
| CV.min | 21.83         | 21.47           | 26.06            | 22.17  | <b>21.11</b> | 21.36        |        |                                                                        |
| AICc   | 22.98         | 21.55           | 21.26            | 22.50  |              |              | 21.78  |                                                                        |
| AIC    | 25.54         | 26.06           | 27.54            | 22.37  |              |              |        |                                                                        |
| BIC    | 29.05         | 29.08           | 29.14            | 28.80  |              |              |        |                                                                        |
| CV.lse | 5.02          | 4.99            | 4.96             | 4.61   | 4.79         |              |        | $\text{sd}(\mu)/\sigma = 1$<br>$\rho = 0.9$<br><i>Oracle</i> : 2.80    |
| CV.min | 4.76          | 4.68            | 4.79             | 4.25   | 4.36         | 4.69         |        |                                                                        |
| AICc   | 4.74          | 4.81            | 4.76             | 4.23   |              |              | 4.70   |                                                                        |
| AIC    | <b>3.92</b>   | 3.98            | 4.36             | 4.11   |              |              |        |                                                                        |
| BIC    | 4.86          | 4.86            | 4.83             | 4.81   |              |              |        |                                                                        |
| CV.lse | 214.42        | 214.86          | 215.02           | 206.23 | 214.59       |              |        | $\text{sd}(\mu)/\sigma = 0.5$<br>$\rho = 0$<br><i>Oracle</i> : 189.14  |
| CV.min | 206.43        | 212.06          | 214.78           | 214.96 | 206.33       | 207.05       |        |                                                                        |
| AICc   | <b>205.31</b> | 212.39          | 215.21           | 209.69 |              |              | 205.37 |                                                                        |
| AIC    | 310.41        | 321.76          | 335.07           | 261.14 |              |              |        |                                                                        |
| BIC    | 214.89        | 215.00          | 217.26           | 214.16 |              |              |        |                                                                        |
| CV.lse | 72.92         | 72.92           | 72.92            | 72.56  | 72.92        |              |        | $\text{sd}(\mu)/\sigma = 0.5$<br>$\rho = 0.5$<br><i>Oracle</i> : 64.15 |
| CV.min | 72.61         | 72.80           | 72.95            | 74.88  | 72.64        | 72.66        |        |                                                                        |
| AICc   | <b>72.32</b>  | 72.89           | 72.96            | 73.92  |              |              | 72.31  |                                                                        |
| AIC    | 104.61        | 107.80          | 112.84           | 89.35  |              |              |        |                                                                        |
| BIC    | 72.91         | 72.92           | 72.92            | 72.88  |              |              |        |                                                                        |
| CV.lse | 12.72         | 12.72           | 12.71            | 12.66  | 12.72        |              |        | $\text{sd}(\mu)/\sigma = 0.5$<br>$\rho = 0.9$<br><i>Oracle</i> : 11.20 |
| CV.min | 12.53         | 12.53           | 12.53            | 12.57  | 12.51        | <b>12.51</b> |        |                                                                        |
| AICc   | <b>12.5</b>   | 12.58           | 12.60            | 12.60  |              |              | 12.50  |                                                                        |
| AIC    | 16.60         | 17.27           | 18.84            | 12.81  |              |              |        |                                                                        |
| BIC    | 12.61         | 12.62           | 12.69            | 12.54  |              |              |        |                                                                        |

Table 19: **Prediction MSE for n=1000, continuous design, sparse covariates, and decay 200.**

|        | lasso         | GL $\gamma = 1$ | GL $\gamma = 10$ | AL     | MCP          | CVbest       | ICbest |                                                                        |
|--------|---------------|-----------------|------------------|--------|--------------|--------------|--------|------------------------------------------------------------------------|
| CV.lse | 22.06         | 20.83           | 18.60            | 21.21  | 18.31        |              |        | $\text{sd}(\mu)/\sigma = 2$<br>$\rho = 0$<br><i>Oracle</i> : 17.37     |
| CV.min | 21.02         | 20.04           | 18.49            | 20.59  | <b>18.26</b> | 18.51        |        |                                                                        |
| AICc   | 21.63         | 20.28           | 19.18            | 20.69  |              |              | 19.29  |                                                                        |
| AIC    | 26.52         | 27.07           | 29.04            | 21.02  |              |              |        |                                                                        |
| BIC    | 26.07         | 23.17           | 20.23            | 23.08  |              |              |        |                                                                        |
| CV.lse | 8.07          | 7.45            | 6.44             | 9.77   | <b>6.03</b>  |              |        | $\text{sd}(\mu)/\sigma = 2$<br>$\rho = 0.5$<br><i>Oracle</i> : 5.87    |
| CV.min | 7.79          | 7.30            | 6.54             | 8.91   | 6.04         | 6.54         |        |                                                                        |
| AICc   | 8.27          | 7.47            | 6.47             | 9.35   |              |              | 6.48   |                                                                        |
| AIC    | 8.98          | 9.08            | 9.65             | 8.69   |              |              |        |                                                                        |
| BIC    | 26.50         | 25.09           | 6.71             | 25.92  |              |              |        |                                                                        |
| CV.lse | 1.44          | 1.33            | 1.17             | 3.34   | <b>1.09</b>  |              |        | $\text{sd}(\mu)/\sigma = 2$<br>$\rho = 0.9$<br><i>Oracle</i> : 1.01    |
| CV.min | 1.39          | 1.31            | 1.18             | 2.88   | 1.10         | 1.19         |        |                                                                        |
| AICc   | 1.51          | 1.35            | 1.16             | 2.90   |              |              | 1.16   |                                                                        |
| AIC    | 1.39          | 1.34            | 1.41             | 2.84   |              |              |        |                                                                        |
| BIC    | 4.27          | 4.28            | 3.44             | 4.21   |              |              |        |                                                                        |
| CV.lse | 91.40         | 92.90           | 107.18           | 84.53  | 88.38        |              |        | $\text{sd}(\mu)/\sigma = 1$<br>$\rho = 0$<br><i>Oracle</i> : 69.47     |
| CV.min | 83.20         | 84.26           | 95.00            | 83.92  | <b>83.19</b> | 83.31        |        |                                                                        |
| AICc   | 85.14         | 84.21           | 93.73            | 83.70  |              |              | 84.23  |                                                                        |
| AIC    | 111.39        | 114.82          | 121.21           | 91.72  |              |              |        |                                                                        |
| BIC    | 125.83        | 125.78          | 126.15           | 116.17 |              |              |        |                                                                        |
| CV.lse | 40.67         | 40.08           | 42.55            | 34.99  | 39.34        |              |        | $\text{sd}(\mu)/\sigma = 1$<br>$\rho = 0.5$<br><i>Oracle</i> : 23.49   |
| CV.min | 34.02         | 34.26           | 41.87            | 33.17  | 33.76        | 33.38        |        |                                                                        |
| AICc   | 35.81         | 32.73           | <b>32.27</b>     | 33.80  |              |              | 33.55  |                                                                        |
| AIC    | 37.63         | 38.50           | 40.63            | 33.23  |              |              |        |                                                                        |
| BIC    | 42.62         | 42.64           | 42.67            | 42.42  |              |              |        |                                                                        |
| CV.lse | 7.28          | 7.27            | 7.23             | 6.96   | 7.25         |              |        | $\text{sd}(\mu)/\sigma = 1$<br>$\rho = 0.9$<br><i>Oracle</i> : 4.03    |
| CV.min | 6.96          | 6.94            | 6.98             | 6.41   | 6.89         | 6.93         |        |                                                                        |
| AICc   | 6.90          | 7.03            | 7.00             | 6.35   |              |              | 6.89   |                                                                        |
| AIC    | <b>5.77</b>   | 5.89            | 6.45             | 5.97   |              |              |        |                                                                        |
| BIC    | 7.09          | 7.11            | 7.11             | 7.01   |              |              |        |                                                                        |
| CV.lse | 315.28        | 315.72          | 315.85           | 304.89 | 315.47       |              |        | $\text{sd}(\mu)/\sigma = 0.5$<br>$\rho = 0$<br><i>Oracle</i> : 277.88  |
| CV.min | 305.33        | 313.63          | 315.86           | 317.57 | 305.18       | 306.22       |        |                                                                        |
| AICc   | <b>303.58</b> | 314.44          | 315.81           | 309.81 |              |              | 303.59 |                                                                        |
| AIC    | 456.70        | 475.12          | 493.35           | 386.66 |              |              |        |                                                                        |
| BIC    | 315.72        | 315.81          | 351.65           | 314.97 |              |              |        |                                                                        |
| CV.lse | 106.78        | 106.79          | 106.78           | 106.40 | 106.79       |              |        | $\text{sd}(\mu)/\sigma = 0.5$<br>$\rho = 0.5$<br><i>Oracle</i> : 93.96 |
| CV.min | 106.43        | 106.70          | 106.84           | 109.83 | 106.46       | 106.57       |        |                                                                        |
| AICc   | <b>106.08</b> | 106.77          | 106.79           | 108.39 |              |              | 106.12 |                                                                        |
| AIC    | 153.36        | 158.62          | 165.71           | 131.58 |              |              |        |                                                                        |
| BIC    | 106.77        | 106.78          | 106.79           | 106.75 |              |              |        |                                                                        |
| CV.lse | 18.33         | 18.33           | 18.32            | 18.28  | 18.33        |              |        | $\text{sd}(\mu)/\sigma = 0.5$<br>$\rho = 0.9$<br><i>Oracle</i> : 16.13 |
| CV.min | 18.14         | 18.15           | 18.20            | 18.18  | 18.14        | <b>18.14</b> |        |                                                                        |
| AICc   | <b>18.1</b>   | 18.22           | 18.29            | 18.23  |              |              | 18.10  |                                                                        |
| AIC    | 24.24         | 25.34           | 27.45            | 18.64  |              |              |        |                                                                        |
| BIC    | 18.25         | 18.28           | 18.32            | 18.18  |              |              |        |                                                                        |

Table 20: **Prediction MSE for n=100, binary design, dense covariates, and decay 10.**

|        | lasso       | GL $\gamma = 1$ | GL $\gamma = 10$ | AL          | MCP  | CVbest | ICbest |                                                                       |
|--------|-------------|-----------------|------------------|-------------|------|--------|--------|-----------------------------------------------------------------------|
| CV.1se | 0.99        | 0.94            | 1.06             | 0.53        | 0.87 |        |        | $\text{sd}(\mu)/\sigma = 2$<br>$\rho = 0$<br><i>Oracle</i> : 0.37     |
| CV.min | 0.59        | 0.63            | 0.84             | <b>0.51</b> | 0.62 | 0.61   |        |                                                                       |
| AICc   | 0.72        | 0.67            | 0.54             | 0.56        |      |        | 0.54   |                                                                       |
| AIC    | 0.55        | 0.55            | 0.56             | 0.52        |      |        |        |                                                                       |
| BIC    | 0.55        | 0.55            | 0.56             | 0.53        |      |        |        |                                                                       |
| CV.1se | 0.97        | 0.92            | 0.99             | 0.49        | 0.83 |        |        | $\text{sd}(\mu)/\sigma = 2$<br>$\rho = 0.5$<br><i>Oracle</i> : 0.33   |
| CV.min | 0.58        | 0.60            | 0.79             | <b>0.46</b> | 0.59 | 0.59   |        |                                                                       |
| AICc   | 0.69        | 0.64            | 0.48             | 0.52        |      |        | 0.48   |                                                                       |
| AIC    | 0.49        | 0.49            | 0.50             | 0.47        |      |        |        |                                                                       |
| BIC    | 0.49        | 0.49            | 0.50             | 0.48        |      |        |        |                                                                       |
| CV.1se | 0.93        | 0.89            | 0.96             | 0.47        | 0.80 |        |        | $\text{sd}(\mu)/\sigma = 2$<br>$\rho = 0.9$<br><i>Oracle</i> : 0.31   |
| CV.min | 0.56        | 0.59            | 0.78             | <b>0.44</b> | 0.58 | 0.58   |        |                                                                       |
| AICc   | 0.67        | 0.63            | 0.46             | 0.50        |      |        | 0.46   |                                                                       |
| AIC    | 0.46        | 0.47            | 0.47             | 0.45        |      |        |        |                                                                       |
| BIC    | 0.46        | 0.47            | 0.47             | 0.46        |      |        |        |                                                                       |
| CV.1se | 2.18        | 2.18            | 2.20             | 1.79        | 2.17 |        |        | $\text{sd}(\mu)/\sigma = 1$<br>$\rho = 0$<br><i>Oracle</i> : 1.40     |
| CV.min | 1.91        | 2.00            | 2.13             | 2.03        | 1.93 | 1.92   |        |                                                                       |
| AICc   | 1.91        | 1.92            | 2.21             | <b>1.73</b> |      |        | 2.20   |                                                                       |
| AIC    | 2.21        | 2.22            | 2.24             | 2.15        |      |        |        |                                                                       |
| BIC    | 2.20        | 2.21            | 2.24             | 2.15        |      |        |        |                                                                       |
| CV.1se | 1.98        | 1.98            | 1.99             | 1.64        | 1.97 |        |        | $\text{sd}(\mu)/\sigma = 1$<br>$\rho = 0.5$<br><i>Oracle</i> : 1.26   |
| CV.min | 1.75        | 1.82            | 1.93             | 1.83        | 1.77 | 1.75   |        |                                                                       |
| AICc   | 1.74        | 1.76            | 1.97             | <b>1.57</b> |      |        | 1.97   |                                                                       |
| AIC    | 1.98        | 1.99            | 2.01             | 1.93        |      |        |        |                                                                       |
| BIC    | 1.98        | 1.98            | 2.01             | 1.93        |      |        |        |                                                                       |
| CV.1se | 1.88        | 1.87            | 1.88             | 1.54        | 1.86 |        |        | $\text{sd}(\mu)/\sigma = 1$<br>$\rho = 0.9$<br><i>Oracle</i> : 1.19   |
| CV.min | 1.66        | 1.72            | 1.82             | 1.72        | 1.67 | 1.67   |        |                                                                       |
| AICc   | 1.66        | 1.67            | 1.86             | <b>1.5</b>  |      |        | 1.86   |                                                                       |
| AIC    | 1.87        | 1.88            | 1.90             | 1.83        |      |        |        |                                                                       |
| BIC    | 1.87        | 1.88            | 1.90             | 1.82        |      |        |        |                                                                       |
| CV.1se | 5.67        | 5.67            | 5.68             | 6.91        | 5.67 |        |        | $\text{sd}(\mu)/\sigma = 0.5$<br>$\rho = 0$<br><i>Oracle</i> : 5.30   |
| CV.min | 5.68        | 5.70            | 5.71             | 8.23        | 5.72 | 5.72   |        |                                                                       |
| AICc   | <b>5.61</b> | 7.11            | 8.94             | 6.01        |      |        | 8.94   |                                                                       |
| AIC    | 8.88        | 8.93            | 9.00             | 8.74        |      |        |        |                                                                       |
| BIC    | 8.87        | 8.92            | 9.00             | 8.73        |      |        |        |                                                                       |
| CV.1se | 5.08        | 5.08            | 5.08             | 6.21        | 5.08 |        |        | $\text{sd}(\mu)/\sigma = 0.5$<br>$\rho = 0.5$<br><i>Oracle</i> : 4.74 |
| CV.min | 5.09        | 5.11            | 5.11             | 7.39        | 5.13 | 5.13   |        |                                                                       |
| AICc   | <b>5.03</b> | 6.20            | 7.98             | 5.41        |      |        | 7.99   |                                                                       |
| AIC    | 7.93        | 7.98            | 8.04             | 7.81        |      |        |        |                                                                       |
| BIC    | 7.93        | 7.97            | 8.04             | 7.81        |      |        |        |                                                                       |
| CV.1se | 4.82        | 4.83            | 4.83             | 5.84        | 4.83 |        |        | $\text{sd}(\mu)/\sigma = 0.5$<br>$\rho = 0.9$<br><i>Oracle</i> : 4.52 |
| CV.min | 4.84        | 4.85            | 4.86             | 6.96        | 4.86 | 4.89   |        |                                                                       |
| AICc   | <b>4.77</b> | 5.83            | 7.57             | 5.14        |      |        | 7.56   |                                                                       |
| AIC    | 7.53        | 7.57            | 7.63             | 7.41        |      |        |        |                                                                       |
| BIC    | 7.52        | 7.56            | 7.63             | 7.40        |      |        |        |                                                                       |

Table 21: Prediction MSE for n=100, binary design, dense covariates, and decay 50.

|        | lasso        | GL $\gamma = 1$ | GL $\gamma = 10$ | AL           | MCP   | CVbest | ICbest |                                                                        |
|--------|--------------|-----------------|------------------|--------------|-------|--------|--------|------------------------------------------------------------------------|
| CV.lse | 7.33         | 7.44            | 7.46             | 3.26         | 7.34  |        |        | $\text{sd}(\mu)/\sigma = 2$<br>$\rho = 0$<br><i>Oracle : 2.73</i>      |
| CV.min | 5.91         | 6.93            | 7.27             | 2.95         | 5.82  | 6.07   |        |                                                                        |
| AICc   | 6.28         | 3.35            | 3.02             | 4.31         |       |        | 3.02   |                                                                        |
| AIC    | 2.98         | 3.00            | 3.03             | <b>2.94</b>  |       |        |        |                                                                        |
| BIC    | 2.98         | 3.00            | 3.03             | <b>2.94</b>  |       |        |        |                                                                        |
| CV.lse | 6.67         | 6.68            | 6.71             | 2.96         | 6.66  |        |        | $\text{sd}(\mu)/\sigma = 2$<br>$\rho = 0.5$<br><i>Oracle : 2.45</i>    |
| CV.min | 5.46         | 6.27            | 6.57             | 2.64         | 5.45  | 5.56   |        |                                                                        |
| AICc   | 5.70         | 3.11            | 2.70             | 3.86         |       |        | 2.71   |                                                                        |
| AIC    | 2.67         | 2.68            | 2.71             | <b>2.63</b>  |       |        |        |                                                                        |
| BIC    | 2.67         | 2.68            | 2.71             | <b>2.63</b>  |       |        |        |                                                                        |
| CV.lse | 6.28         | 6.30            | 6.35             | 2.89         | 6.29  |        |        | $\text{sd}(\mu)/\sigma = 2$<br>$\rho = 0.9$<br><i>Oracle : 2.31</i>    |
| CV.min | 5.24         | 5.94            | 6.21             | 2.51         | 5.27  | 5.32   |        |                                                                        |
| AICc   | 5.46         | 3.15            | 2.55             | 3.77         |       |        | 2.55   |                                                                        |
| AIC    | 2.52         | 2.54            | 2.56             | <b>2.49</b>  |       |        |        |                                                                        |
| BIC    | 2.52         | 2.54            | 2.56             | <b>2.49</b>  |       |        |        |                                                                        |
| CV.lse | 12.07        | 12.11           | 12.12            | 10.25        | 12.07 |        |        | $\text{sd}(\mu)/\sigma = 1$<br>$\rho = 0$<br><i>Oracle : 9.58</i>      |
| CV.min | 11.33        | 11.94           | 12.07            | 11.32        | 11.41 | 11.48  |        |                                                                        |
| AICc   | 11.31        | 11.06           | 12.10            | <b>10.12</b> |       |        | 12.09  |                                                                        |
| AIC    | 11.96        | 12.05           | 12.14            | 11.78        |       |        |        |                                                                        |
| BIC    | 11.96        | 12.04           | 12.14            | 11.77        |       |        |        |                                                                        |
| CV.lse | 10.82        | 10.84           | 10.85            | 9.17         | 10.82 |        |        | $\text{sd}(\mu)/\sigma = 1$<br>$\rho = 0.5$<br><i>Oracle : 8.54</i>    |
| CV.min | 10.25        | 10.69           | 10.82            | 10.09        | 10.33 | 10.36  |        |                                                                        |
| AICc   | 10.15        | 9.82            | 10.78            | <b>9.06</b>  |       |        | 10.78  |                                                                        |
| AIC    | 10.66        | 10.73           | 10.82            | 10.49        |       |        |        |                                                                        |
| BIC    | 10.65        | 10.72           | 10.82            | 10.49        |       |        |        |                                                                        |
| CV.lse | 10.25        | 10.27           | 10.27            | 8.73         | 10.26 |        |        | $\text{sd}(\mu)/\sigma = 1$<br>$\rho = 0.9$<br><i>Oracle : 8.05</i>    |
| CV.min | 9.73         | 10.12           | 10.23            | 9.51         | 9.75  | 9.80   |        |                                                                        |
| AICc   | 9.66         | 9.31            | 10.20            | <b>8.66</b>  |       |        | 10.21  |                                                                        |
| AIC    | 10.09        | 10.16           | 10.24            | 9.93         |       |        |        |                                                                        |
| BIC    | 10.08        | 10.15           | 10.24            | 9.93         |       |        |        |                                                                        |
| CV.lse | 30.53        | 30.55           | 30.60            | 37.75        | 30.56 |        |        | $\text{sd}(\mu)/\sigma = 0.5$<br>$\rho = 0$<br><i>Oracle : 31.48</i>   |
| CV.min | 30.69        | 30.74           | 30.82            | 44.89        | 30.81 | 30.94  |        |                                                                        |
| AICc   | <b>30.41</b> | 45.69           | 48.52            | 32.65        |       |        | 48.53  |                                                                        |
| AIC    | 47.87        | 48.29           | 48.60            | 47.19        |       |        |        |                                                                        |
| BIC    | 47.84        | 48.27           | 48.60            | 47.17        |       |        |        |                                                                        |
| CV.lse | 27.31        | 27.33           | 27.33            | 33.73        | 27.33 |        |        | $\text{sd}(\mu)/\sigma = 0.5$<br>$\rho = 0.5$<br><i>Oracle : 28.08</i> |
| CV.min | 27.44        | 27.49           | 27.51            | 39.84        | 27.55 | 27.71  |        |                                                                        |
| AICc   | <b>27.22</b> | 40.56           | 43.22            | 29.07        |       |        | 43.30  |                                                                        |
| AIC    | 42.66        | 43.03           | 43.30            | 42.06        |       |        |        |                                                                        |
| BIC    | 42.64        | 43.01           | 43.30            | 42.04        |       |        |        |                                                                        |
| CV.lse | 25.85        | 25.87           | 25.88            | 31.38        | 25.87 |        |        | $\text{sd}(\mu)/\sigma = 0.5$<br>$\rho = 0.9$<br><i>Oracle : 26.61</i> |
| CV.min | 26.00        | 25.97           | 26.03            | 37.38        | 26.07 | 26.25  |        |                                                                        |
| AICc   | <b>25.67</b> | 38.25           | 40.92            | 27.59        |       |        | 41.08  |                                                                        |
| AIC    | 40.38        | 40.73           | 40.99            | 39.78        |       |        |        |                                                                        |
| BIC    | 40.36        | 40.71           | 40.99            | 39.76        |       |        |        |                                                                        |

Table 22: **Prediction MSE for n=100, binary design, dense covariates, and decay 100.**

|        | lasso        | GL $\gamma = 1$ | GL $\gamma = 10$ | AL           | MCP   | CVbest | ICbest |                                                                        |
|--------|--------------|-----------------|------------------|--------------|-------|--------|--------|------------------------------------------------------------------------|
| CV.lse | 14.97        | 15.13           | 15.17            | 6.70         | 15.02 |        |        | $\text{sd}(\mu)/\sigma = 2$<br>$\rho = 0$<br><i>Oracle</i> : 6.12      |
| CV.min | 12.62        | 14.61           | 14.91            | 5.99         | 12.53 | 12.89  |        |                                                                        |
| AICc   | 13.31        | 6.05            | 6.12             | 9.01         |       |        | 6.14   |                                                                        |
| AIC    | 6.04         | 6.08            | 6.13             | <b>5.96</b>  |       |        |        |                                                                        |
| BIC    | 6.04         | 6.08            | 6.13             | <b>5.96</b>  |       |        |        |                                                                        |
| CV.lse | 13.48        | 13.54           | 13.55            | 6.03         | 13.50 |        |        | $\text{sd}(\mu)/\sigma = 2$<br>$\rho = 0.5$<br><i>Oracle</i> : 5.45    |
| CV.min | 11.56        | 13.10           | 13.37            | 5.35         | 11.65 | 11.77  |        |                                                                        |
| AICc   | 11.88        | 5.49            | 5.44             | 8.14         |       |        | 5.46   |                                                                        |
| AIC    | 5.37         | 5.41            | 5.45             | 5.31         |       |        |        |                                                                        |
| BIC    | 5.37         | 5.41            | 5.45             | <b>5.3</b>   |       |        |        |                                                                        |
| CV.lse | 12.74        | 12.81           | 12.84            | 5.92         | 12.80 |        |        | $\text{sd}(\mu)/\sigma = 2$<br>$\rho = 0.9$<br><i>Oracle</i> : 5.16    |
| CV.min | 10.99        | 12.38           | 12.67            | 5.11         | 10.93 | 11.21  |        |                                                                        |
| AICc   | 11.29        | 5.27            | 5.17             | 7.86         |       |        | 5.16   |                                                                        |
| AIC    | 5.10         | 5.14            | 5.18             | <b>5.04</b>  |       |        |        |                                                                        |
| BIC    | 5.10         | 5.13            | 5.18             | <b>5.04</b>  |       |        |        |                                                                        |
| CV.lse | 24.48        | 24.56           | 24.57            | 20.88        | 24.50 |        |        | $\text{sd}(\mu)/\sigma = 1$<br>$\rho = 0$<br><i>Oracle</i> : 21.34     |
| CV.min | 23.19        | 24.40           | 24.52            | 22.96        | 23.24 | 23.46  |        |                                                                        |
| AICc   | 23.11        | 23.13           | 24.53            | <b>20.63</b> |       |        | 24.52  |                                                                        |
| AIC    | 24.21        | 24.42           | 24.58            | 23.85        |       |        |        |                                                                        |
| BIC    | 24.20        | 24.41           | 24.58            | 23.84        |       |        |        |                                                                        |
| CV.lse | 21.91        | 21.95           | 21.95            | 18.66        | 21.94 |        |        | $\text{sd}(\mu)/\sigma = 1$<br>$\rho = 0.5$<br><i>Oracle</i> : 19.00   |
| CV.min | 20.91        | 21.80           | 21.92            | 20.46        | 21.03 | 21.13  |        |                                                                        |
| AICc   | 20.78        | 20.54           | 21.87            | <b>18.48</b> |       |        | 21.87  |                                                                        |
| AIC    | 21.58        | 21.76           | 21.91            | 21.26        |       |        |        |                                                                        |
| BIC    | 21.57        | 21.76           | 21.91            | 21.25        |       |        |        |                                                                        |
| CV.lse | 20.67        | 20.71           | 20.72            | 17.65        | 20.70 |        |        | $\text{sd}(\mu)/\sigma = 1$<br>$\rho = 0.9$<br><i>Oracle</i> : 17.97   |
| CV.min | 19.66        | 20.53           | 20.67            | 19.21        | 19.67 | 19.78  |        |                                                                        |
| AICc   | 19.53        | 19.34           | 20.61            | <b>17.53</b> |       |        | 20.58  |                                                                        |
| AIC    | 20.35        | 20.51           | 20.66            | 20.05        |       |        |        |                                                                        |
| BIC    | 20.34        | 20.50           | 20.66            | 20.04        |       |        |        |                                                                        |
| CV.lse | 61.84        | 61.86           | 61.92            | 76.46        | 61.85 |        |        | $\text{sd}(\mu)/\sigma = 0.5$<br>$\rho = 0$<br><i>Oracle</i> : 64.46   |
| CV.min | 62.12        | 62.25           | 62.34            | 90.65        | 62.44 | 62.36  |        |                                                                        |
| AICc   | <b>61.54</b> | 94.48           | 98.16            | 66.07        |       |        | 98.14  |                                                                        |
| AIC    | 96.74        | 97.74           | 98.25            | 95.38        |       |        |        |                                                                        |
| BIC    | 96.70        | 97.70           | 98.25            | 95.35        |       |        |        |                                                                        |
| CV.lse | 55.33        | 55.40           | 55.36            | 68.27        | 55.34 |        |        | $\text{sd}(\mu)/\sigma = 0.5$<br>$\rho = 0.5$<br><i>Oracle</i> : 57.58 |
| CV.min | 55.59        | 55.77           | 55.74            | 80.79        | 55.83 | 56.06  |        |                                                                        |
| AICc   | <b>55.07</b> | 83.89           | 87.52            | 59.02        |       |        | 87.55  |                                                                        |
| AIC    | 86.29        | 87.15           | 87.62            | 85.08        |       |        |        |                                                                        |
| BIC    | 86.25        | 87.11           | 87.62            | 85.05        |       |        |        |                                                                        |
| CV.lse | 52.31        | 52.35           | 52.39            | 63.43        | 52.34 |        |        | $\text{sd}(\mu)/\sigma = 0.5$<br>$\rho = 0.9$<br><i>Oracle</i> : 54.48 |
| CV.min | 52.51        | 52.62           | 52.66            | 75.65        | 52.69 | 52.76  |        |                                                                        |
| AICc   | <b>51.93</b> | 79.08           | 82.74            | 55.84        |       |        | 82.80  |                                                                        |
| AIC    | 81.57        | 82.38           | 82.83            | 80.38        |       |        |        |                                                                        |
| BIC    | 81.52        | 82.35           | 82.83            | 80.28        |       |        |        |                                                                        |

Table 23: **Prediction MSE for n=100, binary design, dense covariates, and decay 200.**

|        | lasso         | GL $\gamma = 1$ | GL $\gamma = 10$ | AL           | MCP    | CVbest | ICbest |                                                                         |
|--------|---------------|-----------------|------------------|--------------|--------|--------|--------|-------------------------------------------------------------------------|
| CV.lse | 30.33         | 30.56           | 30.60            | 13.61        | 30.38  |        |        | $\text{sd}(\mu)/\sigma = 2$<br>$\rho = 0$<br><i>Oracle</i> : 12.55      |
| CV.min | 26.07         | 29.77           | 30.17            | 12.06        | 25.72  | 26.61  |        |                                                                         |
| AICc   | 27.01         | 12.04           | 12.33            | 18.27        |        |        | 12.32  |                                                                         |
| AIC    | 12.15         | 12.26           | 12.34            | <b>12</b>    |        |        |        |                                                                         |
| BIC    | 12.15         | 12.26           | 12.34            | <b>12</b>    |        |        |        |                                                                         |
| CV.lse | 27.21         | 27.33           | 27.35            | 12.36        | 27.28  |        |        | $\text{sd}(\mu)/\sigma = 2$<br>$\rho = 0.5$<br><i>Oracle</i> : 11.21    |
| CV.min | 23.89         | 26.73           | 27.01            | 10.79        | 23.88  | 24.36  |        |                                                                         |
| AICc   | 24.26         | 10.74           | 10.99            | 16.73        |        |        | 11.03  |                                                                         |
| AIC    | 10.83         | 10.93           | 11.00            | <b>10.7</b>  |        |        |        |                                                                         |
| BIC    | 10.83         | 10.92           | 11.00            | <b>10.7</b>  |        |        |        |                                                                         |
| CV.lse | 25.68         | 25.79           | 25.82            | 11.97        | 25.74  |        |        | $\text{sd}(\mu)/\sigma = 2$<br>$\rho = 0.9$<br><i>Oracle</i> : 10.60    |
| CV.min | 22.64         | 25.13           | 25.46            | 10.24        | 22.44  | 22.96  |        |                                                                         |
| AICc   | 22.74         | 10.23           | 10.38            | 15.86        |        |        | 10.38  |                                                                         |
| AIC    | 10.24         | 10.33           | 10.39            | <b>10.12</b> |        |        |        |                                                                         |
| BIC    | 10.23         | 10.32           | 10.39            | <b>10.12</b> |        |        |        |                                                                         |
| CV.lse | 49.21         | 49.37           | 49.37            | 42.14        | 49.29  |        |        | $\text{sd}(\mu)/\sigma = 1$<br>$\rho = 0$<br><i>Oracle</i> : 46.19      |
| CV.min | 46.77         | 49.09           | 49.30            | 46.25        | 46.84  | 47.45  |        |                                                                         |
| AICc   | 46.69         | 47.26           | 49.34            | <b>41.64</b> |        |        | 49.49  |                                                                         |
| AIC    | 48.63         | 49.11           | 49.40            | 47.93        |        |        |        |                                                                         |
| BIC    | 48.61         | 49.09           | 49.40            | 47.91        |        |        |        |                                                                         |
| CV.lse | 44.03         | 44.14           | 44.15            | 37.50        | 44.11  |        |        | $\text{sd}(\mu)/\sigma = 1$<br>$\rho = 0.5$<br><i>Oracle</i> : 41.04    |
| CV.min | 42.08         | 43.93           | 44.11            | 41.17        | 42.30  | 42.64  |        |                                                                         |
| AICc   | 41.73         | 42.04           | 43.94            | <b>37.24</b> |        |        | 43.91  |                                                                         |
| AIC    | 43.31         | 43.73           | 43.99            | 42.68        |        |        |        |                                                                         |
| BIC    | 43.29         | 43.72           | 43.99            | 42.67        |        |        |        |                                                                         |
| CV.lse | 41.58         | 41.69           | 41.70            | 35.58        | 41.60  |        |        | $\text{sd}(\mu)/\sigma = 1$<br>$\rho = 0.9$<br><i>Oracle</i> : 38.90    |
| CV.min | 39.52         | 41.37           | 41.58            | 38.66        | 39.66  | 39.88  |        |                                                                         |
| AICc   | 39.23         | 39.74           | 41.49            | <b>35.18</b> |        |        | 41.47  |                                                                         |
| AIC    | 40.90         | 41.29           | 41.54            | 40.32        |        |        |        |                                                                         |
| BIC    | 40.88         | 41.27           | 41.54            | 40.30        |        |        |        |                                                                         |
| CV.lse | 124.66        | 124.81          | 124.79           | 154.61       | 124.68 |        |        | $\text{sd}(\mu)/\sigma = 0.5$<br>$\rho = 0$<br><i>Oracle</i> : 130.14   |
| CV.min | 125.32        | 125.62          | 125.84           | 182.91       | 125.93 | 126.26 |        |                                                                         |
| AICc   | <b>124.15</b> | 193.36          | 198.18           | 133.05       |        |        | 198.35 |                                                                         |
| AIC    | 195.19        | 197.42          | 198.29           | 192.44       |        |        |        |                                                                         |
| BIC    | 195.11        | 197.36          | 198.28           | 192.34       |        |        |        |                                                                         |
| CV.lse | 111.25        | 111.38          | 111.34           | 136.84       | 111.28 |        |        | $\text{sd}(\mu)/\sigma = 0.5$<br>$\rho = 0.5$<br><i>Oracle</i> : 116.03 |
| CV.min | 111.79        | 112.04          | 112.02           | 162.37       | 112.21 | 112.54 |        |                                                                         |
| AICc   | <b>110.75</b> | 171.44          | 176.10           | 118.55       |        |        | 175.96 |                                                                         |
| AIC    | 173.46        | 175.42          | 176.20           | 171.07       |        |        |        |                                                                         |
| BIC    | 173.39        | 175.35          | 176.19           | 171.01       |        |        |        |                                                                         |
| CV.lse | 105.14        | 105.23          | 105.25           | 127.70       | 105.21 |        |        | $\text{sd}(\mu)/\sigma = 0.5$<br>$\rho = 0.9$<br><i>Oracle</i> : 109.94 |
| CV.min | 105.41        | 105.68          | 105.77           | 152.09       | 105.93 | 105.96 |        |                                                                         |
| AICc   | <b>104.31</b> | 161.77          | 166.42           | 112.41       |        |        | 166.20 |                                                                         |
| AIC    | 163.88        | 165.73          | 166.50           | 161.47       |        |        |        |                                                                         |
| BIC    | 163.80        | 165.66          | 166.50           | 161.41       |        |        |        |                                                                         |

Table 24: Prediction MSE for n=100, continuous design, dense covariates, and decay 10.

|        | lasso        | GL $\gamma = 1$ | GL $\gamma = 10$ | AL          | MCP   | CVbest      | ICbest |                                                                       |
|--------|--------------|-----------------|------------------|-------------|-------|-------------|--------|-----------------------------------------------------------------------|
| CV.1se | 4.07         | 3.93            | 4.31             | 2.11        | 3.58  |             |        | $\text{sd}(\mu)/\sigma = 2$<br>$\rho = 0$<br><i>Oracle</i> : 1.48     |
| CV.min | 2.44         | 2.60            | 3.40             | <b>2.03</b> | 2.52  | 2.53        |        |                                                                       |
| AICc   | 2.89         | 3.36            | 2.23             | 2.24        |       |             | 2.39   |                                                                       |
| AIC    | 2.20         | 2.21            | 2.24             | 2.10        |       |             |        |                                                                       |
| BIC    | 2.20         | 2.20            | 2.23             | 2.15        |       |             |        |                                                                       |
| CV.1se | 2.01         | 1.97            | 1.89             | 1.04        | 1.82  |             |        | $\text{sd}(\mu)/\sigma = 2$<br>$\rho = 0.5$<br><i>Oracle</i> : 0.56   |
| CV.min | 1.54         | 1.55            | 1.68             | 0.84        | 1.44  | 1.50        |        |                                                                       |
| AICc   | 1.57         | 1.81            | 1.01             | 1.16        |       |             | 1.26   |                                                                       |
| AIC    | 0.83         | 0.84            | 0.84             | <b>0.82</b> |       |             |        |                                                                       |
| BIC    | 0.83         | 0.84            | 0.84             | 0.91        |       |             |        |                                                                       |
| CV.1se | 0.40         | 0.39            | 0.34             | 0.29        | 0.37  |             |        | $\text{sd}(\mu)/\sigma = 2$<br>$\rho = 0.9$<br><i>Oracle</i> : 0.15   |
| CV.min | 0.32         | 0.32            | 0.32             | 0.22        | 0.31  | 0.32        |        |                                                                       |
| AICc   | 0.32         | 0.35            | 0.33             | 0.25        |       |             | 0.32   |                                                                       |
| AIC    | 0.22         | 0.22            | 0.22             | <b>0.2</b>  |       |             |        |                                                                       |
| BIC    | 0.24         | 0.23            | 0.22             | 0.32        |       |             |        |                                                                       |
| CV.1se | 8.82         | 8.80            | 8.92             | 7.23        | 8.80  |             |        | $\text{sd}(\mu)/\sigma = 1$<br>$\rho = 0$<br><i>Oracle</i> : 5.62     |
| CV.min | 7.73         | 8.04            | 8.56             | 8.16        | 7.76  | 7.79        |        |                                                                       |
| AICc   | 7.66         | 8.50            | 8.88             | <b>6.93</b> |       |             | 8.56   |                                                                       |
| AIC    | 8.87         | 8.91            | 9.00             | 8.65        |       |             |        |                                                                       |
| BIC    | 8.87         | 8.91            | 9.00             | 8.63        |       |             |        |                                                                       |
| CV.1se | 3.39         | 3.38            | 3.36             | 2.83        | 3.36  |             |        | $\text{sd}(\mu)/\sigma = 1$<br>$\rho = 0.5$<br><i>Oracle</i> : 2.11   |
| CV.min | 3.11         | 3.16            | 3.26             | 3.07        | 3.11  | 3.10        |        |                                                                       |
| AICc   | 3.08         | 3.29            | 3.31             | <b>2.79</b> |       |             | 3.20   |                                                                       |
| AIC    | 3.35         | 3.36            | 3.39             | 3.28        |       |             |        |                                                                       |
| BIC    | 3.35         | 3.36            | 3.39             | 3.27        |       |             |        |                                                                       |
| CV.1se | 0.84         | 0.82            | 0.74             | 0.72        | 0.79  |             |        | $\text{sd}(\mu)/\sigma = 1$<br>$\rho = 0.9$<br><i>Oracle</i> : 0.56   |
| CV.min | 0.71         | 0.71            | 0.69             | 0.70        | 0.69  | <b>0.69</b> |        |                                                                       |
| AICc   | 0.70         | 0.74            | 0.71             | <b>0.68</b> |       |             | 0.70   |                                                                       |
| AIC    | 0.89         | 0.89            | 0.91             | 0.80        |       |             |        |                                                                       |
| BIC    | 0.89         | 0.89            | 0.91             | 0.70        |       |             |        |                                                                       |
| CV.1se | 22.83        | 22.84           | 22.85            | 27.74       | 22.85 |             |        | $\text{sd}(\mu)/\sigma = 0.5$<br>$\rho = 0$<br><i>Oracle</i> : 21.25  |
| CV.min | 22.87        | 22.91           | 23.01            | 33.04       | 22.94 | 22.99       |        |                                                                       |
| AICc   | <b>22.53</b> | 24.53           | 35.87            | 24.03       |       |             | 33.38  |                                                                       |
| AIC    | 35.61        | 35.81           | 36.11            | 35.06       |       |             |        |                                                                       |
| BIC    | 35.59        | 35.80           | 36.10            | 35.04       |       |             |        |                                                                       |
| CV.1se | 8.59         | 8.59            | 8.60             | 10.06       | 8.59  |             |        | $\text{sd}(\mu)/\sigma = 0.5$<br>$\rho = 0.5$<br><i>Oracle</i> : 7.97 |
| CV.min | 8.58         | 8.59            | 8.64             | 12.07       | 8.62  | 8.65        |        |                                                                       |
| AICc   | <b>8.52</b>  | 8.61            | 13.38            | 9.09        |       |             | 11.49  |                                                                       |
| AIC    | 13.39        | 13.44           | 13.56            | 13.17       |       |             |        |                                                                       |
| BIC    | 13.38        | 13.44           | 13.56            | 13.15       |       |             |        |                                                                       |
| CV.1se | 2.33         | 2.32            | 2.32             | 2.29        | 2.32  |             |        | $\text{sd}(\mu)/\sigma = 0.5$<br>$\rho = 0.9$<br><i>Oracle</i> : 2.11 |
| CV.min | 2.26         | 2.26            | 2.29             | 2.53        | 2.26  | <b>2.26</b> |        |                                                                       |
| AICc   | <b>2.24</b>  | 2.28            | 3.11             | 2.34        |       |             | 2.28   |                                                                       |
| AIC    | 3.61         | 3.62            | 3.67             | 3.44        |       |             |        |                                                                       |
| BIC    | 3.60         | 3.62            | 3.67             | 2.66        |       |             |        |                                                                       |



Table 25: Prediction MSE for n=100, continuous design, dense covariates, and decay 50.

|        | lasso         | GL $\gamma = 1$ | GL $\gamma = 10$ | AL           | MCP    | CVbest | ICbest |                                                                        |
|--------|---------------|-----------------|------------------|--------------|--------|--------|--------|------------------------------------------------------------------------|
| CV.lse | 29.84         | 30.21           | 30.39            | 13.26        | 29.97  |        |        | $\text{sd}(\mu)/\sigma = 2$<br>$\rho = 0$<br><i>Oracle</i> : 11.08     |
| CV.min | 24.06         | 28.29           | 29.64            | 11.90        | 24.04  | 24.66  |        |                                                                        |
| AICc   | 25.41         | 22.67           | 12.22            | 17.14        |        |        | 14.70  |                                                                        |
| AIC    | 12.07         | 12.15           | 12.26            | 11.89        |        |        |        |                                                                        |
| BIC    | 12.07         | 12.14           | 12.26            | <b>11.88</b> |        |        |        |                                                                        |
| CV.lse | 10.41         | 10.41           | 10.42            | 5.40         | 10.39  |        |        | $\text{sd}(\mu)/\sigma = 2$<br>$\rho = 0.5$<br><i>Oracle</i> : 3.78    |
| CV.min | 9.40          | 9.94            | 10.30            | 4.26         | 9.42   | 9.43   |        |                                                                        |
| AICc   | 9.31          | 10.16           | 4.16             | 6.64         |        |        | 5.91   |                                                                        |
| AIC    | 4.13          | 4.15            | 4.18             | 4.09         |        |        |        |                                                                        |
| BIC    | 4.13          | 4.14            | 4.18             | <b>4.08</b>  |        |        |        |                                                                        |
| CV.lse | 1.88          | 1.86            | 1.83             | 1.54         | 1.85   |        |        | $\text{sd}(\mu)/\sigma = 2$<br>$\rho = 0.9$<br><i>Oracle</i> : 0.68    |
| CV.min | 1.60          | 1.61            | 1.69             | 1.12         | 1.59   | 1.58   |        |                                                                        |
| AICc   | 1.55          | 1.78            | 1.31             | 1.26         |        |        | 1.53   |                                                                        |
| AIC    | 0.75          | 0.75            | 0.76             | <b>0.74</b>  |        |        |        |                                                                        |
| BIC    | 0.75          | 0.75            | 0.76             | 1.38         |        |        |        |                                                                        |
| CV.lse | 48.97         | 49.08           | 49.11            | 41.41        | 49.03  |        |        | $\text{sd}(\mu)/\sigma = 1$<br>$\rho = 0$<br><i>Oracle</i> : 38.53     |
| CV.min | 46.03         | 48.36           | 48.95            | 45.64        | 46.16  | 46.53  |        |                                                                        |
| AICc   | 45.69         | 46.15           | 48.71            | <b>40.67</b> |        |        | 47.97  |                                                                        |
| AIC    | 48.15         | 48.51           | 48.87            | 47.37        |        |        |        |                                                                        |
| BIC    | 48.13         | 48.49           | 48.86            | 47.35        |        |        |        |                                                                        |
| CV.lse | 16.82         | 16.83           | 16.85            | 14.38        | 16.81  |        |        | $\text{sd}(\mu)/\sigma = 1$<br>$\rho = 0.5$<br><i>Oracle</i> : 13.23   |
| CV.min | 16.23         | 16.58           | 16.82            | 15.44        | 16.19  | 16.25  |        |                                                                        |
| AICc   | 16.03         | 16.57           | 16.64            | <b>14.36</b> |        |        | 16.44  |                                                                        |
| AIC    | 16.54         | 16.62           | 16.77            | 16.30        |        |        |        |                                                                        |
| BIC    | 16.53         | 16.61           | 16.76            | 16.29        |        |        |        |                                                                        |
| CV.lse | 3.06          | 3.06            | 3.06             | 2.82         | 3.06   |        |        | $\text{sd}(\mu)/\sigma = 1$<br>$\rho = 0.9$<br><i>Oracle</i> : 2.37    |
| CV.min | 2.89          | 2.90            | 2.99             | <b>2.61</b>  | 2.88   | 2.88   |        |                                                                        |
| AICc   | 2.83          | 3.01            | 2.98             | 2.64         |        |        | 2.84   |                                                                        |
| AIC    | 2.99          | 3.00            | 3.04             | 2.88         |        |        |        |                                                                        |
| BIC    | 2.99          | 3.00            | 3.04             | 2.87         |        |        |        |                                                                        |
| CV.lse | 123.67        | 123.68          | 123.80           | 151.41       | 123.69 |        |        | $\text{sd}(\mu)/\sigma = 0.5$<br>$\rho = 0$<br><i>Oracle</i> : 126.96  |
| CV.min | 124.09        | 124.31          | 124.59           | 180.32       | 125.12 | 125.16 |        |                                                                        |
| AICc   | <b>122.78</b> | 181.19          | 195.40           | 131.22       |        |        | 183.19 |                                                                        |
| AIC    | 192.75        | 194.48          | 195.68           | 189.98       |        |        |        |                                                                        |
| BIC    | 192.67        | 194.40          | 195.66           | 189.91       |        |        |        |                                                                        |
| CV.lse | 42.38         | 42.39           | 42.42            | 49.61        | 42.42  |        |        | $\text{sd}(\mu)/\sigma = 0.5$<br>$\rho = 0.5$<br><i>Oracle</i> : 43.47 |
| CV.min | 42.56         | 42.60           | 42.70            | 59.52        | 42.68  | 42.99  |        |                                                                        |
| AICc   | <b>42.17</b>  | 50.84           | 66.80            | 45.06        |        |        | 59.79  |                                                                        |
| AIC    | 66.10         | 66.57           | 67.06            | 65.12        |        |        |        |                                                                        |
| BIC    | 66.07         | 66.53           | 67.05            | 65.09        |        |        |        |                                                                        |
| CV.lse | 7.73          | 7.73            | 7.74             | 7.84         | 7.73   |        |        | $\text{sd}(\mu)/\sigma = 0.5$<br>$\rho = 0.9$<br><i>Oracle</i> : 7.75  |
| CV.min | 7.71          | 7.73            | 7.78             | 8.64         | 7.74   | 7.76   |        |                                                                        |
| AICc   | <b>7.66</b>   | 7.72            | 12.06            | 8.10         |        |        | 7.97   |                                                                        |
| AIC    | 11.97         | 12.05           | 12.19            | 11.58        |        |        |        |                                                                        |
| BIC    | 11.96         | 12.05           | 12.18            | 10.18        |        |        |        |                                                                        |

Table 26: **Prediction MSE for n=100, continuous design, dense covariates, and decay 100.**

|        | lasso         | GL $\gamma = 1$ | GL $\gamma = 10$ | AL           | MCP    | CVbest | ICbest |                                                                        |
|--------|---------------|-----------------|------------------|--------------|--------|--------|--------|------------------------------------------------------------------------|
| CV.lse | 61.16         | 61.57           | 61.63            | 27.47        | 61.23  |        |        | $\text{sd}(\mu)/\sigma = 2$<br>$\rho = 0$<br><i>Oracle</i> : 24.83     |
| CV.min | 51.50         | 59.56           | 60.70            | 24.23        | 51.80  | 52.42  |        |                                                                        |
| AICc   | 53.49         | 32.73           | 24.78            | 36.31        |        |        | 29.58  |                                                                        |
| AIC    | 24.45         | 24.64           | 24.82            | <b>24.13</b> |        |        |        |                                                                        |
| BIC    | 24.44         | 24.63           | 24.82            | 24.14        |        |        |        |                                                                        |
| CV.lse | 20.83         | 20.84           | 20.86            | 10.87        | 20.84  |        |        | $\text{sd}(\mu)/\sigma = 2$<br>$\rho = 0.5$<br><i>Oracle</i> : 8.37    |
| CV.min | 19.15         | 20.19           | 20.68            | 8.57         | 19.09  | 19.18  |        |                                                                        |
| AICc   | 18.93         | 18.83           | 8.35             | 13.38        |        |        | 11.41  |                                                                        |
| AIC    | 8.26          | 8.30            | 8.37             | <b>8.18</b>  |        |        |        |                                                                        |
| BIC    | 8.25          | 8.30            | 8.37             | 8.21         |        |        |        |                                                                        |
| CV.lse | 3.54          | 3.54            | 3.53             | 3.00         | 3.54   |        |        | $\text{sd}(\mu)/\sigma = 2$<br>$\rho = 0.9$<br><i>Oracle</i> : 1.42    |
| CV.min | 3.20          | 3.27            | 3.41             | 2.17         | 3.21   | 3.20   |        |                                                                        |
| AICc   | 3.11          | 3.48            | 1.60             | 2.48         |        |        | 3.07   |                                                                        |
| AIC    | 1.40          | 1.40            | 1.42             | <b>1.38</b>  |        |        |        |                                                                        |
| BIC    | 1.40          | 1.40            | 1.42             | 2.30         |        |        |        |                                                                        |
| CV.lse | 99.62         | 99.74           | 99.82            | 84.51        | 99.66  |        |        | $\text{sd}(\mu)/\sigma = 1$<br>$\rho = 0$<br><i>Oracle</i> : 86.46     |
| CV.min | 94.55         | 98.98           | 99.72            | 92.58        | 94.75  | 95.42  |        |                                                                        |
| AICc   | 93.78         | 93.69           | 99.07            | <b>83.67</b> |        |        | 97.14  |                                                                        |
| AIC    | 97.75         | 98.62           | 99.27            | 96.27        |        |        |        |                                                                        |
| BIC    | 97.71         | 98.58           | 99.26            | 96.23        |        |        |        |                                                                        |
| CV.lse | 33.64         | 33.67           | 33.71            | <b>28.79</b> | 33.68  |        |        | $\text{sd}(\mu)/\sigma = 1$<br>$\rho = 0.5$<br><i>Oracle</i> : 29.19   |
| CV.min | 32.47         | 33.31           | 33.69            | 30.80        | 32.52  | 32.68  |        |                                                                        |
| AICc   | 32.08         | 32.43           | 33.36            | 28.83        |        |        | 33.03  |                                                                        |
| AIC    | 33.02         | 33.24           | 33.49            | 32.55        |        |        |        |                                                                        |
| BIC    | 33.00         | 33.22           | 33.49            | 32.53        |        |        |        |                                                                        |
| CV.lse | 5.73          | 5.73            | 5.73             | 5.38         | 5.74   |        |        | $\text{sd}(\mu)/\sigma = 1$<br>$\rho = 0.9$<br><i>Oracle</i> : 4.90    |
| CV.min | 5.53          | 5.59            | 5.70             | <b>4.97</b>  | 5.53   | 5.53   |        |                                                                        |
| AICc   | 5.44          | 5.70            | 5.62             | 5.05         |        |        | 5.46   |                                                                        |
| AIC    | 5.58          | 5.61            | 5.68             | 5.42         |        |        |        |                                                                        |
| BIC    | 5.58          | 5.61            | 5.68             | 5.44         |        |        |        |                                                                        |
| CV.lse | 250.85        | 250.88          | 251.03           | 307.99       | 251.08 |        |        | $\text{sd}(\mu)/\sigma = 0.5$<br>$\rho = 0$<br><i>Oracle</i> : 260.93  |
| CV.min | 251.92        | 252.45          | 253.02           | 365.30       | 253.21 | 254.15 |        |                                                                        |
| AICc   | <b>249.33</b> | 381.45          | 396.97           | 266.84       |        |        | 369.87 |                                                                        |
| AIC    | 391.16        | 395.18          | 397.28           | 385.61       |        |        |        |                                                                        |
| BIC    | 390.99        | 395.04          | 397.25           | 385.45       |        |        |        |                                                                        |
| CV.lse | 84.75         | 84.79           | 84.80            | 98.73        | 84.80  |        |        | $\text{sd}(\mu)/\sigma = 0.5$<br>$\rho = 0.5$<br><i>Oracle</i> : 87.87 |
| CV.min | 85.25         | 85.31           | 85.31            | 118.99       | 85.26  | 85.82  |        |                                                                        |
| AICc   | <b>84.43</b>  | 117.72          | 133.55           | 90.21        |        |        | 120.78 |                                                                        |
| AIC    | 131.83        | 132.94          | 133.82           | 129.89       |        |        |        |                                                                        |
| BIC    | 131.76        | 132.88          | 133.81           | 129.82       |        |        |        |                                                                        |
| CV.lse | 14.44         | 14.44           | 14.45            | 14.67        | 14.45  |        |        | $\text{sd}(\mu)/\sigma = 0.5$<br>$\rho = 0.9$<br><i>Oracle</i> : 14.79 |
| CV.min | 14.44         | 14.49           | 14.54            | 16.22        | 14.49  | 14.53  |        |                                                                        |
| AICc   | <b>14.39</b>  | 14.47           | 22.61            | 15.14        |        |        | 15.23  |                                                                        |
| AIC    | 22.32         | 22.50           | 22.75            | 21.62        |        |        |        |                                                                        |
| BIC    | 22.31         | 22.50           | 22.74            | 18.94        |        |        |        |                                                                        |

Table 27: **Prediction MSE for n=100, continuous design, dense covariates, and decay 200.**

|        | lasso         | GL $\gamma = 1$ | GL $\gamma = 10$ | AL            | MCP    | CVbest | ICbest |                                                                         |
|--------|---------------|-----------------|------------------|---------------|--------|--------|--------|-------------------------------------------------------------------------|
| CV.lse | 123.78        | 124.17          | 124.38           | 55.67         | 123.87 |        |        | $\text{sd}(\mu)/\sigma = 2$<br>$\rho = 0$<br><i>Oracle : 50.89</i>      |
| CV.min | 105.81        | 121.52          | 122.75           | 48.79         | 106.45 | 108.24 |        |                                                                         |
| AICc   | 109.36        | 52.25           | 49.94            | 74.35         |        |        | 58.01  |                                                                         |
| AIC    | 49.18         | 49.63           | 49.96            | 48.59         |        |        |        |                                                                         |
| BIC    | 49.16         | 49.61           | 49.96            | <b>48.58</b>  |        |        |        |                                                                         |
| CV.lse | 41.62         | 41.63           | 41.66            | 21.97         | 41.60  |        |        | $\text{sd}(\mu)/\sigma = 2$<br>$\rho = 0.5$<br><i>Oracle : 17.03</i>    |
| CV.min | 38.52         | 40.66           | 41.36            | 17.13         | 38.32  | 38.69  |        |                                                                         |
| AICc   | 37.84         | 29.69           | 16.67            | 26.77         |        |        | 22.67  |                                                                         |
| AIC    | 16.46         | 16.57           | 16.70            | 16.31         |        |        |        |                                                                         |
| BIC    | 16.45         | 16.57           | 16.69            | <b>16.3</b>   |        |        |        |                                                                         |
| CV.lse | 6.86          | 6.85            | 6.85             | 5.93          | 6.86   |        |        | $\text{sd}(\mu)/\sigma = 2$<br>$\rho = 0.9$<br><i>Oracle : 2.80</i>     |
| CV.min | 6.37          | 6.53            | 6.75             | 4.25          | 6.36   | 6.35   |        |                                                                         |
| AICc   | 6.19          | 6.79            | 2.75             | 4.94          |        |        | 5.95   |                                                                         |
| AIC    | 2.70          | 2.71            | 2.74             | <b>2.67</b>   |        |        |        |                                                                         |
| BIC    | 2.69          | 2.71            | 2.74             | 4.17          |        |        |        |                                                                         |
| CV.lse | 200.18        | 200.56          | 200.62           | 170.55        | 200.38 |        |        | $\text{sd}(\mu)/\sigma = 1$<br>$\rho = 0$<br><i>Oracle : 186.60</i>     |
| CV.min | 190.91        | 199.28          | 200.41           | 186.30        | 190.80 | 193.05 |        |                                                                         |
| AICc   | 189.24        | 191.81          | 199.68           | <b>168.56</b> |        |        | 197.28 |                                                                         |
| AIC    | 196.78        | 198.74          | 199.88           | 193.84        |        |        |        |                                                                         |
| BIC    | 196.71        | 198.66          | 199.87           | 193.77        |        |        |        |                                                                         |
| CV.lse | 67.24         | 67.30           | 67.34            | <b>57.55</b>  | 67.30  |        |        | $\text{sd}(\mu)/\sigma = 1$<br>$\rho = 0.5$<br><i>Oracle : 62.50</i>    |
| CV.min | 64.84         | 66.87           | 67.31            | 61.27         | 64.94  | 65.33  |        |                                                                         |
| AICc   | 64.19         | 63.51           | 66.78            | <b>57.55</b>  |        |        | 66.20  |                                                                         |
| AIC    | 65.93         | 66.46           | 66.92            | 65.00         |        |        |        |                                                                         |
| BIC    | 65.88         | 66.43           | 66.91            | 64.97         |        |        |        |                                                                         |
| CV.lse | 11.08         | 11.07           | 11.08            | 10.48         | 11.08  |        |        | $\text{sd}(\mu)/\sigma = 1$<br>$\rho = 0.9$<br><i>Oracle : 10.21</i>    |
| CV.min | 10.75         | 10.89           | 11.04            | <b>9.69</b>   | 10.77  | 10.78  |        |                                                                         |
| AICc   | 10.58         | 11.04           | 10.92            | 9.86          |        |        | 10.61  |                                                                         |
| AIC    | 10.79         | 10.87           | 10.99            | 10.50         |        |        |        |                                                                         |
| BIC    | 10.79         | 10.87           | 10.99            | 10.60         |        |        |        |                                                                         |
| CV.lse | 505.57        | 505.68          | 505.88           | 621.63        | 505.30 |        |        | $\text{sd}(\mu)/\sigma = 0.5$<br>$\rho = 0$<br><i>Oracle : 527.53</i>   |
| CV.min | 507.03        | 508.25          | 509.82           | 736.30        | 509.71 | 511.25 |        |                                                                         |
| AICc   | <b>502.04</b> | 779.80          | 797.64           | 536.72        |        |        | 735.78 |                                                                         |
| AIC    | 787.28        | 796.26          | 799.84           | 776.11        |        |        |        |                                                                         |
| BIC    | 786.99        | 795.99          | 799.78           | 775.79        |        |        |        |                                                                         |
| CV.lse | 169.34        | 169.55          | 169.49           | 197.63        | 169.47 |        |        | $\text{sd}(\mu)/\sigma = 0.5$<br>$\rho = 0.5$<br><i>Oracle : 176.63</i> |
| CV.min | 170.16        | 170.31          | 170.41           | 237.39        | 170.31 | 171.26 |        |                                                                         |
| AICc   | <b>168.77</b> | 252.44          | 267.51           | 180.60        |        |        | 241.61 |                                                                         |
| AIC    | 263.70        | 266.29          | 267.81           | 259.78        |        |        |        |                                                                         |
| BIC    | 263.52        | 266.19          | 267.78           | 259.63        |        |        |        |                                                                         |
| CV.lse | 27.83         | 27.83           | 27.85            | 28.27         | 27.84  |        |        | $\text{sd}(\mu)/\sigma = 0.5$<br>$\rho = 0.9$<br><i>Oracle : 28.81</i>  |
| CV.min | 27.80         | 27.97           | 28.03            | 31.23         | 27.92  | 27.95  |        |                                                                         |
| AICc   | <b>27.75</b>  | 28.33           | 43.63            | 29.27         |        |        | 29.04  |                                                                         |
| AIC    | 43.01         | 43.43           | 43.86            | 41.67         |        |        |        |                                                                         |
| BIC    | 42.99         | 43.41           | 43.84            | 36.55         |        |        |        |                                                                         |

Table 28: **Prediction MSE for n=100, binary design, sparse covariates, and decay 10.**

|        | lasso       | GL $\gamma = 1$ | GL $\gamma = 10$ | AL          | MCP         | CVbest      | ICbest      |                                                                     |
|--------|-------------|-----------------|------------------|-------------|-------------|-------------|-------------|---------------------------------------------------------------------|
| CV.1se | 0.64        | 0.57            | 0.63             | <b>0.4</b>  | 0.47        |             |             | sd( $\mu$ )/ $\sigma = 2$<br>$\rho = 0$<br><i>Oracle</i> : 0.27     |
| CV.min | 0.42        | <b>0.4</b>      | 0.46             | 0.41        | <b>0.4</b>  | <b>0.41</b> |             |                                                                     |
| AICc   | 0.48        | 0.43            | 0.46             | <b>0.4</b>  |             |             | 0.45        |                                                                     |
| AIC    | 0.47        | 0.47            | 0.48             | 0.44        |             |             |             |                                                                     |
| BIC    | 0.47        | 0.47            | 0.48             | 0.44        |             |             |             |                                                                     |
| CV.1se | 0.65        | 0.57            | 0.63             | 0.38        | 0.46        |             |             | sd( $\mu$ )/ $\sigma = 2$<br>$\rho = 0.5$<br><i>Oracle</i> : 0.24   |
| CV.min | 0.40        | 0.38            | 0.45             | 0.38        | <b>0.37</b> | <b>0.38</b> |             |                                                                     |
| AICc   | 0.47        | 0.41            | 0.41             | 0.39        |             |             | 0.41        |                                                                     |
| AIC    | 0.42        | 0.42            | 0.43             | 0.40        |             |             |             |                                                                     |
| BIC    | 0.42        | 0.42            | 0.43             | 0.40        |             |             |             |                                                                     |
| CV.1se | 0.64        | 0.56            | 0.63             | <b>0.36</b> | 0.45        |             |             | sd( $\mu$ )/ $\sigma = 2$<br>$\rho = 0.9$<br><i>Oracle</i> : 0.23   |
| CV.min | 0.39        | 0.38            | 0.45             | <b>0.36</b> | <b>0.36</b> | <b>0.38</b> |             |                                                                     |
| AICc   | 0.46        | 0.40            | 0.38             | 0.38        |             |             | <b>0.38</b> |                                                                     |
| AIC    | 0.40        | 0.40            | 0.41             | 0.38        |             |             |             |                                                                     |
| BIC    | 0.40        | 0.40            | 0.41             | 0.38        |             |             |             |                                                                     |
| CV.1se | 1.86        | 1.86            | 1.89             | 1.52        | 1.84        |             |             | sd( $\mu$ )/ $\sigma = 1$<br>$\rho = 0$<br><i>Oracle</i> : 1.09     |
| CV.min | 1.58        | 1.65            | 1.78             | 1.74        | 1.60        | 1.59        |             |                                                                     |
| AICc   | 1.58        | 1.60            | 1.91             | <b>1.45</b> |             |             | 1.91        |                                                                     |
| AIC    | 1.91        | 1.92            | 1.94             | 1.86        |             |             |             |                                                                     |
| BIC    | 1.91        | 1.92            | 1.94             | 1.85        |             |             |             |                                                                     |
| CV.1se | 1.69        | 1.68            | 1.70             | 1.39        | 1.67        |             |             | sd( $\mu$ )/ $\sigma = 1$<br>$\rho = 0.5$<br><i>Oracle</i> : 0.97   |
| CV.min | 1.46        | 1.50            | 1.62             | 1.57        | 1.47        | 1.46        |             |                                                                     |
| AICc   | 1.45        | 1.46            | 1.70             | <b>1.32</b> |             |             | 1.70        |                                                                     |
| AIC    | 1.71        | 1.72            | 1.74             | 1.66        |             |             |             |                                                                     |
| BIC    | 1.71        | 1.72            | 1.73             | 1.66        |             |             |             |                                                                     |
| CV.1se | 1.60        | 1.60            | 1.62             | 1.31        | 1.58        |             |             | sd( $\mu$ )/ $\sigma = 1$<br>$\rho = 0.9$<br><i>Oracle</i> : 0.92   |
| CV.min | 1.39        | 1.43            | 1.54             | 1.48        | 1.40        | 1.39        |             |                                                                     |
| AICc   | 1.39        | 1.40            | 1.61             | <b>1.26</b> |             |             | 1.61        |                                                                     |
| AIC    | 1.62        | 1.63            | 1.64             | 1.58        |             |             |             |                                                                     |
| BIC    | 1.62        | 1.63            | 1.64             | 1.57        |             |             |             |                                                                     |
| CV.1se | 4.92        | 4.92            | 4.93             | 5.99        | 4.92        |             |             | sd( $\mu$ )/ $\sigma = 0.5$<br>$\rho = 0$<br><i>Oracle</i> : 4.35   |
| CV.min | 4.92        | 4.94            | 4.97             | 7.11        | 4.96        | 4.96        |             |                                                                     |
| AICc   | <b>4.87</b> | 5.98            | 7.74             | 5.20        |             |             | 7.74        |                                                                     |
| AIC    | 7.69        | 7.74            | 7.80             | 7.57        |             |             |             |                                                                     |
| BIC    | 7.69        | 7.73            | 7.80             | 7.57        |             |             |             |                                                                     |
| CV.1se | 4.40        | 4.40            | 4.41             | 5.38        | 4.40        |             |             | sd( $\mu$ )/ $\sigma = 0.5$<br>$\rho = 0.5$<br><i>Oracle</i> : 3.90 |
| CV.min | 4.41        | 4.42            | 4.43             | 6.39        | 4.44        | 4.44        |             |                                                                     |
| AICc   | <b>4.36</b> | 5.23            | 6.91             | 4.66        |             |             | 6.91        |                                                                     |
| AIC    | 6.87        | 6.91            | 6.97             | 6.77        |             |             |             |                                                                     |
| BIC    | 6.87        | 6.91            | 6.97             | 6.76        |             |             |             |                                                                     |
| CV.1se | 4.18        | 4.18            | 4.18             | 5.02        | 4.18        |             |             | sd( $\mu$ )/ $\sigma = 0.5$<br>$\rho = 0.9$<br><i>Oracle</i> : 3.69 |
| CV.min | 4.18        | 4.19            | 4.21             | 6.00        | 4.20        | 4.21        |             |                                                                     |
| AICc   | <b>4.13</b> | 4.86            | 6.53             | 4.42        |             |             | 6.54        |                                                                     |
| AIC    | 6.50        | 6.54            | 6.59             | 6.40        |             |             |             |                                                                     |
| BIC    | 6.50        | 6.53            | 6.59             | 6.39        |             |             |             |                                                                     |

Table 29: Prediction MSE for n=100, binary design, sparse covariates, and decay 50.

|        | lasso        | GL $\gamma = 1$ | GL $\gamma = 10$ | AL          | MCP   | CVbest | ICbest |                                                                       |
|--------|--------------|-----------------|------------------|-------------|-------|--------|--------|-----------------------------------------------------------------------|
| CV.lse | 1.47         | 1.35            | 1.90             | 0.84        | 1.13  |        |        | $\text{sd}(\mu)/\sigma = 2$<br>$\rho = 0$<br><i>Oracle : 0.56</i>     |
| CV.min | 0.91         | 0.88            | 1.34             | 0.86        | 0.87  | 0.87   |        |                                                                       |
| AICc   | 1.06         | <b>0.83</b>     | 0.97             | 0.86        |       |        | 0.97   |                                                                       |
| AIC    | 0.98         | 0.98            | 1.00             | 0.93        |       |        |        |                                                                       |
| BIC    | 0.98         | 0.98            | 1.00             | 0.92        |       |        |        |                                                                       |
| CV.lse | 1.54         | 1.43            | 1.82             | <b>0.79</b> | 1.17  |        |        | $\text{sd}(\mu)/\sigma = 2$<br>$\rho = 0.5$<br><i>Oracle : 0.50</i>   |
| CV.min | 0.89         | 0.89            | 1.39             | <b>0.79</b> | 0.85  | 0.86   |        |                                                                       |
| AICc   | 1.07         | <b>0.79</b>     | 0.86             | 0.83        |       |        | 0.86   |                                                                       |
| AIC    | 0.88         | 0.88            | 0.89             | 0.84        |       |        |        |                                                                       |
| BIC    | 0.88         | 0.88            | 0.89             | 0.84        |       |        |        |                                                                       |
| CV.lse | 1.50         | 1.40            | 1.78             | <b>0.76</b> | 1.18  |        |        | $\text{sd}(\mu)/\sigma = 2$<br>$\rho = 0.9$<br><i>Oracle : 0.48</i>   |
| CV.min | 0.87         | 0.90            | 1.37             | <b>0.76</b> | 0.84  | 0.85   |        |                                                                       |
| AICc   | 1.05         | 0.79            | 0.81             | 0.82        |       |        | 0.82   |                                                                       |
| AIC    | 0.83         | 0.83            | 0.84             | 0.79        |       |        |        |                                                                       |
| BIC    | 0.83         | 0.83            | 0.84             | 0.79        |       |        |        |                                                                       |
| CV.lse | 3.93         | 3.96            | 4.00             | 3.22        | 3.93  |        |        | $\text{sd}(\mu)/\sigma = 1$<br>$\rho = 0$<br><i>Oracle : 2.25</i>     |
| CV.min | 3.41         | 3.65            | 3.89             | 3.67        | 3.44  | 3.45   |        |                                                                       |
| AICc   | 3.43         | 3.42            | 3.99             | <b>3.09</b> |       |        | 3.99   |                                                                       |
| AIC    | 3.97         | 3.99            | 4.03             | 3.87        |       |        |        |                                                                       |
| BIC    | 3.96         | 3.99            | 4.03             | 3.86        |       |        |        |                                                                       |
| CV.lse | 3.54         | 3.54            | 3.58             | 2.93        | 3.54  |        |        | $\text{sd}(\mu)/\sigma = 1$<br>$\rho = 0.5$<br><i>Oracle : 2.01</i>   |
| CV.min | 3.14         | 3.32            | 3.49             | 3.29        | 3.17  | 3.16   |        |                                                                       |
| AICc   | 3.13         | 3.09            | 3.55             | <b>2.82</b> |       |        | 3.56   |                                                                       |
| AIC    | 3.54         | 3.56            | 3.59             | 3.46        |       |        |        |                                                                       |
| BIC    | 3.54         | 3.55            | 3.59             | 3.45        |       |        |        |                                                                       |
| CV.lse | 3.34         | 3.36            | 3.38             | 2.77        | 3.33  |        |        | $\text{sd}(\mu)/\sigma = 1$<br>$\rho = 0.9$<br><i>Oracle : 1.90</i>   |
| CV.min | 2.98         | 3.15            | 3.30             | 3.08        | 3.00  | 3.00   |        |                                                                       |
| AICc   | 2.98         | 2.94            | 3.35             | <b>2.68</b> |       |        | 3.34   |                                                                       |
| AIC    | 3.34         | 3.35            | 3.39             | 3.26        |       |        |        |                                                                       |
| BIC    | 3.33         | 3.35            | 3.39             | 3.26        |       |        |        |                                                                       |
| CV.lse | 10.17        | 10.17           | 10.19            | 12.43       | 10.17 |        |        | $\text{sd}(\mu)/\sigma = 0.5$<br>$\rho = 0$<br><i>Oracle : 9.00</i>   |
| CV.min | 10.17        | 10.22           | 10.26            | 14.81       | 10.28 | 10.23  |        |                                                                       |
| AICc   | <b>10.09</b> | 14.04           | 16.09            | 10.77       |       |        | 16.07  |                                                                       |
| AIC    | 15.93        | 16.04           | 16.16            | 15.68       |       |        |        |                                                                       |
| BIC    | 15.92        | 16.03           | 16.16            | 15.66       |       |        |        |                                                                       |
| CV.lse | 9.09         | 9.10            | 9.11             | 11.13       | 9.10  |        |        | $\text{sd}(\mu)/\sigma = 0.5$<br>$\rho = 0.5$<br><i>Oracle : 8.05</i> |
| CV.min | 9.13         | 9.13            | 9.16             | 13.22       | 9.18  | 9.18   |        |                                                                       |
| AICc   | <b>9.02</b>  | 12.34           | 14.33            | 9.64        |       |        | 14.32  |                                                                       |
| AIC    | 14.20        | 14.29           | 14.40            | 13.98       |       |        |        |                                                                       |
| BIC    | 14.19        | 14.29           | 14.40            | 13.97       |       |        |        |                                                                       |
| CV.lse | 8.59         | 8.60            | 8.60             | 10.43       | 8.59  |        |        | $\text{sd}(\mu)/\sigma = 0.5$<br>$\rho = 0.9$<br><i>Oracle : 7.61</i> |
| CV.min | 8.62         | 8.64            | 8.65             | 12.40       | 8.66  | 8.71   |        |                                                                       |
| AICc   | <b>8.52</b>  | 11.58           | 13.53            | 9.14        |       |        | 13.53  |                                                                       |
| AIC    | 13.40        | 13.49           | 13.60            | 13.19       |       |        |        |                                                                       |
| BIC    | 13.39        | 13.48           | 13.59            | 13.18       |       |        |        |                                                                       |

Table 30: **Prediction MSE for n=100, binary design, sparse covariates, and decay 100.**

|        | lasso        | GL $\gamma = 1$ | GL $\gamma = 10$ | AL          | MCP   | CVbest | ICbest |                                                                       |
|--------|--------------|-----------------|------------------|-------------|-------|--------|--------|-----------------------------------------------------------------------|
| CV.lse | 1.64         | 1.52            | 2.13             | 0.93        | 1.27  |        |        | $\text{sd}(\mu)/\sigma = 2$<br>$\rho = 0$<br><i>Oracle : 0.62</i>     |
| CV.min | 1.01         | 0.98            | 1.54             | 0.96        | 0.97  | 0.98   |        |                                                                       |
| AICc   | 1.18         | <b>0.92</b>     | 1.08             | 0.96        |       |        | 1.08   |                                                                       |
| AIC    | 1.09         | 1.09            | 1.11             | 1.03        |       |        |        |                                                                       |
| BIC    | 1.09         | 1.09            | 1.11             | 1.02        |       |        |        |                                                                       |
| CV.lse | 1.73         | 1.61            | 2.07             | 0.88        | 1.31  |        |        | $\text{sd}(\mu)/\sigma = 2$<br>$\rho = 0.5$<br><i>Oracle : 0.56</i>   |
| CV.min | 1.00         | 1.00            | 1.58             | 0.88        | 0.95  | 0.96   |        |                                                                       |
| AICc   | 1.19         | <b>0.86</b>     | 0.96             | 0.92        |       |        | 0.96   |                                                                       |
| AIC    | 0.97         | 0.97            | 0.99             | 0.93        |       |        |        |                                                                       |
| BIC    | 0.97         | 0.97            | 0.99             | 0.93        |       |        |        |                                                                       |
| CV.lse | 1.68         | 1.57            | 2.00             | 0.85        | 1.33  |        |        | $\text{sd}(\mu)/\sigma = 2$<br>$\rho = 0.9$<br><i>Oracle : 0.53</i>   |
| CV.min | 0.97         | 1.02            | 1.56             | <b>0.84</b> | 0.93  | 0.95   |        |                                                                       |
| AICc   | 1.17         | 0.86            | 0.91             | 0.90        |       |        | 0.91   |                                                                       |
| AIC    | 0.92         | 0.92            | 0.93             | 0.88        |       |        |        |                                                                       |
| BIC    | 0.92         | 0.92            | 0.93             | 0.88        |       |        |        |                                                                       |
| CV.lse | 4.37         | 4.39            | 4.44             | 3.57        | 4.36  |        |        | $\text{sd}(\mu)/\sigma = 1$<br>$\rho = 0$<br><i>Oracle : 2.50</i>     |
| CV.min | 3.79         | 4.08            | 4.32             | 4.07        | 3.83  | 3.85   |        |                                                                       |
| AICc   | 3.81         | 3.81            | 4.44             | <b>3.44</b> |       |        | 4.44   |                                                                       |
| AIC    | 4.41         | 4.43            | 4.48             | 4.30        |       |        |        |                                                                       |
| BIC    | 4.40         | 4.43            | 4.48             | 4.29        |       |        |        |                                                                       |
| CV.lse | 3.93         | 3.94            | 3.97             | 3.25        | 3.93  |        |        | $\text{sd}(\mu)/\sigma = 1$<br>$\rho = 0.5$<br><i>Oracle : 2.23</i>   |
| CV.min | 3.50         | 3.70            | 3.89             | 3.66        | 3.54  | 3.54   |        |                                                                       |
| AICc   | 3.48         | 3.43            | 3.95             | <b>3.13</b> |       |        | 3.95   |                                                                       |
| AIC    | 3.93         | 3.95            | 3.99             | 3.84        |       |        |        |                                                                       |
| BIC    | 3.93         | 3.95            | 3.99             | 3.84        |       |        |        |                                                                       |
| CV.lse | 3.72         | 3.74            | 3.76             | 3.08        | 3.71  |        |        | $\text{sd}(\mu)/\sigma = 1$<br>$\rho = 0.9$<br><i>Oracle : 2.11</i>   |
| CV.min | 3.31         | 3.52            | 3.68             | 3.43        | 3.34  | 3.34   |        |                                                                       |
| AICc   | 3.32         | 3.26            | 3.73             | <b>2.98</b> |       |        | 3.73   |                                                                       |
| AIC    | 3.71         | 3.73            | 3.77             | 3.63        |       |        |        |                                                                       |
| BIC    | 3.71         | 3.73            | 3.77             | 3.63        |       |        |        |                                                                       |
| CV.lse | 11.29        | 11.30           | 11.32            | 13.82       | 11.30 |        |        | $\text{sd}(\mu)/\sigma = 0.5$<br>$\rho = 0$<br><i>Oracle : 9.99</i>   |
| CV.min | 11.31        | 11.36           | 11.41            | 16.47       | 11.43 | 11.40  |        |                                                                       |
| AICc   | <b>11.21</b> | 15.81           | 17.90            | 11.99       |       |        | 17.88  |                                                                       |
| AIC    | 17.71        | 17.84           | 17.97            | 17.43       |       |        |        |                                                                       |
| BIC    | 17.70        | 17.83           | 17.97            | 17.42       |       |        |        |                                                                       |
| CV.lse | 10.09        | 10.09           | 10.10            | 12.37       | 10.09 |        |        | $\text{sd}(\mu)/\sigma = 0.5$<br>$\rho = 0.5$<br><i>Oracle : 8.94</i> |
| CV.min | 10.15        | 10.14           | 10.17            | 14.68       | 10.19 | 10.25  |        |                                                                       |
| AICc   | <b>10</b>    | 13.91           | 15.92            | 10.71       |       |        | 15.95  |                                                                       |
| AIC    | 15.76        | 15.87           | 15.99            | 15.52       |       |        |        |                                                                       |
| BIC    | 15.76        | 15.86           | 15.99            | 15.51       |       |        |        |                                                                       |
| CV.lse | 9.54         | 9.55            | 9.56             | 11.59       | 9.54  |        |        | $\text{sd}(\mu)/\sigma = 0.5$<br>$\rho = 0.9$<br><i>Oracle : 8.45</i> |
| CV.min | 9.59         | 9.59            | 9.61             | 13.78       | 9.62  | 9.66   |        |                                                                       |
| AICc   | <b>9.46</b>  | 13.05           | 15.04            | 10.15       |       |        | 15.03  |                                                                       |
| AIC    | 14.89        | 14.99           | 15.10            | 14.65       |       |        |        |                                                                       |
| BIC    | 14.88        | 14.98           | 15.10            | 14.65       |       |        |        |                                                                       |

Table 31: Prediction MSE for n=100, binary design, sparse covariates, and decay 200.

|        | lasso        | GL $\gamma = 1$ | GL $\gamma = 10$ | AL          | MCP   | CVbest | ICbest |                                                                       |
|--------|--------------|-----------------|------------------|-------------|-------|--------|--------|-----------------------------------------------------------------------|
| CV.lse | 1.73         | 1.60            | 2.24             | 0.98        | 1.33  |        |        | $\text{sd}(\mu)/\sigma = 2$<br>$\rho = 0$<br><i>Oracle</i> : 0.66     |
| CV.min | 1.07         | 1.04            | 1.63             | 1.01        | 1.03  | 1.02   |        |                                                                       |
| AICc   | 1.24         | <b>0.96</b>     | 1.14             | 1.01        |       |        | 1.14   |                                                                       |
| AIC    | 1.15         | 1.15            | 1.17             | 1.09        |       |        |        |                                                                       |
| BIC    | 1.15         | 1.15            | 1.17             | 1.08        |       |        |        |                                                                       |
| CV.lse | 1.83         | 1.71            | 2.19             | 0.92        | 1.39  |        |        | $\text{sd}(\mu)/\sigma = 2$<br>$\rho = 0.5$<br><i>Oracle</i> : 0.59   |
| CV.min | 1.05         | 1.06            | 1.68             | 0.93        | 1.00  | 1.02   |        |                                                                       |
| AICc   | 1.25         | <b>0.9</b>      | 1.02             | 0.97        |       |        | 1.02   |                                                                       |
| AIC    | 1.03         | 1.03            | 1.04             | 0.98        |       |        |        |                                                                       |
| BIC    | 1.03         | 1.03            | 1.04             | 0.98        |       |        |        |                                                                       |
| CV.lse | 1.77         | 1.66            | 2.11             | <b>0.89</b> | 1.41  |        |        | $\text{sd}(\mu)/\sigma = 2$<br>$\rho = 0.9$<br><i>Oracle</i> : 0.56   |
| CV.min | 1.02         | 1.08            | 1.65             | <b>0.89</b> | 0.99  | 1.01   |        |                                                                       |
| AICc   | 1.24         | 0.90            | 0.96             | 0.95        |       |        | 0.96   |                                                                       |
| AIC    | 0.97         | 0.97            | 0.99             | 0.93        |       |        |        |                                                                       |
| BIC    | 0.97         | 0.97            | 0.99             | 0.93        |       |        |        |                                                                       |
| CV.lse | 4.60         | 4.63            | 4.68             | 3.77        | 4.60  |        |        | $\text{sd}(\mu)/\sigma = 1$<br>$\rho = 0$<br><i>Oracle</i> : 2.63     |
| CV.min | 4.00         | 4.31            | 4.56             | 4.29        | 4.04  | 4.06   |        |                                                                       |
| AICc   | 4.02         | 4.02            | 4.68             | <b>3.62</b> |       |        | 4.68   |                                                                       |
| AIC    | 4.64         | 4.67            | 4.72             | 4.53        |       |        |        |                                                                       |
| BIC    | 4.64         | 4.67            | 4.72             | 4.52        |       |        |        |                                                                       |
| CV.lse | 4.15         | 4.16            | 4.20             | 3.44        | 4.15  |        |        | $\text{sd}(\mu)/\sigma = 1$<br>$\rho = 0.5$<br><i>Oracle</i> : 2.36   |
| CV.min | 3.69         | 3.92            | 4.11             | 3.86        | 3.73  | 3.75   |        |                                                                       |
| AICc   | 3.68         | 3.62            | 4.18             | <b>3.31</b> |       |        | 4.18   |                                                                       |
| AIC    | 4.15         | 4.18            | 4.22             | 4.06        |       |        |        |                                                                       |
| BIC    | 4.15         | 4.17            | 4.22             | 4.06        |       |        |        |                                                                       |
| CV.lse | 3.92         | 3.95            | 3.97             | 3.25        | 3.91  |        |        | $\text{sd}(\mu)/\sigma = 1$<br>$\rho = 0.9$<br><i>Oracle</i> : 2.23   |
| CV.min | 3.50         | 3.71            | 3.88             | 3.62        | 3.53  | 3.53   |        |                                                                       |
| AICc   | 3.51         | 3.44            | 3.94             | <b>3.14</b> |       |        | 3.93   |                                                                       |
| AIC    | 3.91         | 3.94            | 3.97             | 3.83        |       |        |        |                                                                       |
| BIC    | 3.91         | 3.93            | 3.97             | 3.82        |       |        |        |                                                                       |
| CV.lse | 11.92        | 11.93           | 11.95            | 14.58       | 11.93 |        |        | $\text{sd}(\mu)/\sigma = 0.5$<br>$\rho = 0$<br><i>Oracle</i> : 10.54  |
| CV.min | 11.93        | 11.99           | 12.04            | 17.34       | 12.05 | 12.01  |        |                                                                       |
| AICc   | <b>11.84</b> | 16.71           | 18.88            | 12.64       |       |        | 18.88  |                                                                       |
| AIC    | 18.67        | 18.80           | 18.95            | 18.38       |       |        |        |                                                                       |
| BIC    | 18.66        | 18.80           | 18.95            | 18.37       |       |        |        |                                                                       |
| CV.lse | 10.65        | 10.66           | 10.67            | 13.06       | 10.65 |        |        | $\text{sd}(\mu)/\sigma = 0.5$<br>$\rho = 0.5$<br><i>Oracle</i> : 9.44 |
| CV.min | 10.72        | 10.71           | 10.73            | 15.50       | 10.77 | 10.78  |        |                                                                       |
| AICc   | <b>10.57</b> | 14.75           | 16.82            | 11.29       |       |        | 16.83  |                                                                       |
| AIC    | 16.65        | 16.76           | 16.89            | 16.39       |       |        |        |                                                                       |
| BIC    | 16.64        | 16.75           | 16.89            | 16.38       |       |        |        |                                                                       |
| CV.lse | 10.06        | 10.07           | 10.07            | 12.21       | 10.06 |        |        | $\text{sd}(\mu)/\sigma = 0.5$<br>$\rho = 0.9$<br><i>Oracle</i> : 8.92 |
| CV.min | 10.12        | 10.13           | 10.12            | 14.51       | 10.13 | 10.21  |        |                                                                       |
| AICc   | <b>9.97</b>  | 13.86           | 15.85            | 10.70       |       |        | 15.87  |                                                                       |
| AIC    | 15.69        | 15.79           | 15.92            | 15.44       |       |        |        |                                                                       |
| BIC    | 15.68        | 15.79           | 15.91            | 15.43       |       |        |        |                                                                       |

Table 32: **Prediction MSE for n=100, continuous design, sparse covariates, and decay 10.**

|        | lasso        | GL $\gamma = 1$ | GL $\gamma = 10$ | AL          | MCP         | CVbest | ICbest |                                                                       |
|--------|--------------|-----------------|------------------|-------------|-------------|--------|--------|-----------------------------------------------------------------------|
| CV.lse | 2.65         | 2.33            | 2.63             | 1.63        | 1.93        |        |        | $\text{sd}(\mu)/\sigma = 2$<br>$\rho = 0$<br><i>Oracle</i> : 1.09     |
| CV.min | 1.71         | 1.64            | 1.90             | 1.64        | <b>1.61</b> | 1.65   |        |                                                                       |
| AICc   | 1.96         | 1.96            | 1.87             | 1.63        |             |        | 1.85   |                                                                       |
| AIC    | 1.89         | 1.89            | 1.92             | 1.77        |             |        |        |                                                                       |
| BIC    | 1.89         | 1.89            | 1.92             | 1.77        |             |        |        |                                                                       |
| CV.lse | 1.76         | 1.68            | 1.59             | 0.92        | 1.46        |        |        | $\text{sd}(\mu)/\sigma = 2$<br>$\rho = 0.5$<br><i>Oracle</i> : 0.43   |
| CV.min | 1.27         | 1.26            | 1.37             | 0.75        | 1.13        | 1.22   |        |                                                                       |
| AICc   | 1.32         | 1.51            | 0.95             | 1.00        |             |        | 1.08   |                                                                       |
| AIC    | 0.75         | 0.75            | 0.76             | <b>0.73</b> |             |        |        |                                                                       |
| BIC    | 0.75         | 0.75            | 0.76             | 0.85        |             |        |        |                                                                       |
| CV.lse | 0.38         | 0.36            | 0.32             | 0.26        | 0.33        |        |        | $\text{sd}(\mu)/\sigma = 2$<br>$\rho = 0.9$<br><i>Oracle</i> : 0.11   |
| CV.min | 0.29         | 0.29            | 0.29             | 0.20        | 0.28        | 0.28   |        |                                                                       |
| AICc   | 0.29         | 0.33            | 0.32             | 0.22        |             |        | 0.29   |                                                                       |
| AIC    | 0.19         | 0.19            | 0.20             | <b>0.18</b> |             |        |        |                                                                       |
| BIC    | 0.20         | 0.20            | 0.20             | 0.30        |             |        |        |                                                                       |
| CV.lse | 7.53         | 7.48            | 7.59             | 6.10        | 7.45        |        |        | $\text{sd}(\mu)/\sigma = 1$<br>$\rho = 0$<br><i>Oracle</i> : 4.37     |
| CV.min | 6.40         | 6.61            | 7.19             | 6.97        | 6.46        | 6.47   |        |                                                                       |
| AICc   | 6.35         | 7.08            | 7.66             | <b>5.83</b> |             |        | 7.24   |                                                                       |
| AIC    | 7.68         | 7.71            | 7.80             | 7.45        |             |        |        |                                                                       |
| BIC    | 7.67         | 7.71            | 7.80             | 7.42        |             |        |        |                                                                       |
| CV.lse | 3.04         | 3.03            | 3.00             | 2.54        | 3.00        |        |        | $\text{sd}(\mu)/\sigma = 1$<br>$\rho = 0.5$<br><i>Oracle</i> : 1.71   |
| CV.min | 2.76         | 2.79            | 2.88             | 2.75        | 2.75        | 2.74   |        |                                                                       |
| AICc   | 2.72         | 2.92            | 2.94             | <b>2.47</b> |             |        | 2.85   |                                                                       |
| AIC    | 3.01         | 3.02            | 3.05             | 2.93        |             |        |        |                                                                       |
| BIC    | 3.00         | 3.01            | 3.04             | 2.92        |             |        |        |                                                                       |
| CV.lse | 0.76         | 0.74            | 0.68             | 0.65        | 0.71        |        |        | $\text{sd}(\mu)/\sigma = 1$<br>$\rho = 0.9$<br><i>Oracle</i> : 0.45   |
| CV.min | 0.65         | 0.64            | 0.63             | 0.62        | 0.63        | 0.63   |        |                                                                       |
| AICc   | 0.64         | 0.68            | 0.66             | <b>0.61</b> |             |        | 0.64   |                                                                       |
| AIC    | 0.78         | 0.78            | 0.80             | 0.71        |             |        |        |                                                                       |
| BIC    | 0.78         | 0.78            | 0.80             | 0.64        |             |        |        |                                                                       |
| CV.lse | 19.79        | 19.80           | 19.81            | 23.84       | 19.80       |        |        | $\text{sd}(\mu)/\sigma = 0.5$<br>$\rho = 0$<br><i>Oracle</i> : 17.46  |
| CV.min | 19.76        | 19.83           | 19.97            | 28.51       | 19.86       | 19.92  |        |                                                                       |
| AICc   | <b>19.54</b> | 20.74           | 31.03            | 20.74       |             |        | 28.50  |                                                                       |
| AIC    | 30.82        | 30.99           | 31.25            | 30.32       |             |        |        |                                                                       |
| BIC    | 30.81        | 30.98           | 31.25            | 30.30       |             |        |        |                                                                       |
| CV.lse | 7.76         | 7.76            | 7.77             | 9.11        | 7.76        |        |        | $\text{sd}(\mu)/\sigma = 0.5$<br>$\rho = 0.5$<br><i>Oracle</i> : 6.84 |
| CV.min | 7.76         | 7.77            | 7.81             | 10.85       | 7.79        | 7.80   |        |                                                                       |
| AICc   | <b>7.68</b>  | 7.76            | 12.06            | 8.19        |             |        | 10.37  |                                                                       |
| AIC    | 12.08        | 12.13           | 12.24            | 11.88       |             |        |        |                                                                       |
| BIC    | 12.07        | 12.12           | 12.23            | 11.86       |             |        |        |                                                                       |
| CV.lse | 2.04         | 2.04            | 2.04             | 2.02        | 2.04        |        |        | $\text{sd}(\mu)/\sigma = 0.5$<br>$\rho = 0.9$<br><i>Oracle</i> : 1.80 |
| CV.min | 2.00         | 2.00            | 2.02             | 2.23        | 2.00        | 2.01   |        |                                                                       |
| AICc   | <b>1.98</b>  | 2.01            | 2.75             | 2.08        |             |        | 2.01   |                                                                       |
| AIC    | 3.16         | 3.17            | 3.21             | 3.02        |             |        |        |                                                                       |
| BIC    | 3.16         | 3.17            | 3.21             | 2.43        |             |        |        |                                                                       |



Table 33: Prediction MSE for n=100, continuous design, sparse covariates, and decay 50.

|        | lasso        | GL $\gamma = 1$ | GL $\gamma = 10$ | AL           | MCP   | CVbest | ICbest |                                                                        |
|--------|--------------|-----------------|------------------|--------------|-------|--------|--------|------------------------------------------------------------------------|
| CV.lse | 6.03         | 5.47            | 7.37             | <b>3.39</b>  | 4.50  |        |        | $\text{sd}(\mu)/\sigma = 2$<br>$\rho = 0$<br><i>Oracle : 2.26</i>      |
| CV.min | 3.66         | 3.54            | 5.12             | 3.45         | 3.45  | 3.51   |        |                                                                        |
| AICc   | 4.24         | 3.93            | 3.83             | 3.46         |       |        | 3.86   |                                                                        |
| AIC    | 3.93         | 3.94            | 4.01             | 3.72         |       |        |        |                                                                        |
| BIC    | 3.93         | 3.94            | 4.00             | 3.71         |       |        |        |                                                                        |
| CV.lse | 3.71         | 3.68            | 3.68             | 1.86         | 3.59  |        |        | $\text{sd}(\mu)/\sigma = 2$<br>$\rho = 0.5$<br><i>Oracle : 0.86</i>    |
| CV.min | 2.90         | 3.04            | 3.39             | 1.52         | 2.83  | 2.85   |        |                                                                        |
| AICc   | 2.94         | 3.45            | 1.54             | 2.11         |       |        | 2.14   |                                                                        |
| AIC    | 1.51         | 1.51            | 1.53             | <b>1.48</b>  |       |        |        |                                                                        |
| BIC    | 1.51         | 1.51            | 1.53             | 1.51         |       |        |        |                                                                        |
| CV.lse | 0.76         | 0.73            | 0.66             | 0.55         | 0.64  |        |        | $\text{sd}(\mu)/\sigma = 2$<br>$\rho = 0.9$<br><i>Oracle : 0.19</i>    |
| CV.min | 0.55         | 0.55            | 0.57             | 0.41         | 0.54  | 0.54   |        |                                                                        |
| AICc   | 0.56         | 0.68            | 0.61             | 0.47         |       |        | 0.56   |                                                                        |
| AIC    | 0.34         | 0.34            | 0.34             | <b>0.33</b>  |       |        |        |                                                                        |
| BIC    | 0.34         | 0.34            | 0.34             | 0.55         |       |        |        |                                                                        |
| CV.lse | 15.86        | 15.92           | 16.11            | 12.87        | 15.83 |        |        | $\text{sd}(\mu)/\sigma = 1$<br>$\rho = 0$<br><i>Oracle : 9.05</i>      |
| CV.min | 13.74        | 14.70           | 15.65            | 14.59        | 13.88 | 13.91  |        |                                                                        |
| AICc   | 13.72        | 15.18           | 16.02            | <b>12.39</b> |       |        | 15.45  |                                                                        |
| AIC    | 15.92        | 16.01           | 16.18            | 15.51        |       |        |        |                                                                        |
| BIC    | 15.91        | 16.00           | 16.18            | 15.49        |       |        |        |                                                                        |
| CV.lse | 6.15         | 6.15            | 6.15             | 5.16         | 6.14  |        |        | $\text{sd}(\mu)/\sigma = 1$<br>$\rho = 0.5$<br><i>Oracle : 3.43</i>    |
| CV.min | 5.74         | 5.87            | 6.06             | 5.58         | 5.74  | 5.75   |        |                                                                        |
| AICc   | 5.67         | 6.04            | 6.02             | <b>5.09</b>  |       |        | 5.91   |                                                                        |
| AIC    | 6.05         | 6.07            | 6.13             | 5.93         |       |        |        |                                                                        |
| BIC    | 6.05         | 6.07            | 6.13             | 5.92         |       |        |        |                                                                        |
| CV.lse | 1.38         | 1.37            | 1.35             | 1.20         | 1.34  |        |        | $\text{sd}(\mu)/\sigma = 1$<br>$\rho = 0.9$<br><i>Oracle : 0.78</i>    |
| CV.min | 1.24         | 1.24            | 1.28             | <b>1.13</b>  | 1.21  | 1.21   |        |                                                                        |
| AICc   | 1.22         | 1.34            | 1.32             | <b>1.13</b>  |       |        | 1.21   |                                                                        |
| AIC    | 1.36         | 1.37            | 1.38             | 1.30         |       |        |        |                                                                        |
| BIC    | 1.36         | 1.36            | 1.38             | 1.25         |       |        |        |                                                                        |
| CV.lse | 41.10        | 41.10           | 41.16            | 49.82        | 41.10 |        |        | $\text{sd}(\mu)/\sigma = 0.5$<br>$\rho = 0$<br><i>Oracle : 36.24</i>   |
| CV.min | 41.17        | 41.36           | 41.49            | 59.63        | 41.39 | 41.46  |        |                                                                        |
| AICc   | <b>40.65</b> | 49.38           | 64.74            | 43.30        |       |        | 59.90  |                                                                        |
| AIC    | 64.05        | 64.49           | 65.00            | 63.04        |       |        |        |                                                                        |
| BIC    | 64.02        | 64.47           | 64.99            | 63.01        |       |        |        |                                                                        |
| CV.lse | 15.53        | 15.54           | 15.54            | 18.34        | 15.53 |        |        | $\text{sd}(\mu)/\sigma = 0.5$<br>$\rho = 0.5$<br><i>Oracle : 13.70</i> |
| CV.min | 15.56        | 15.59           | 15.65            | 21.83        | 15.63 | 15.68  |        |                                                                        |
| AICc   | <b>15.41</b> | 15.84           | 24.32            | 16.43        |       |        | 21.33  |                                                                        |
| AIC    | 24.20        | 24.32           | 24.53            | 23.82        |       |        |        |                                                                        |
| BIC    | 24.18        | 24.31           | 24.52            | 23.81        |       |        |        |                                                                        |
| CV.lse | 3.54         | 3.54            | 3.54             | 3.58         | 3.54  |        |        | $\text{sd}(\mu)/\sigma = 0.5$<br>$\rho = 0.9$<br><i>Oracle : 3.12</i>  |
| CV.min | 3.52         | 3.54            | 3.55             | 3.95         | 3.53  | 3.54   |        |                                                                        |
| AICc   | <b>3.49</b>  | 3.53            | 5.40             | 3.67         |       |        | 3.57   |                                                                        |
| AIC    | 5.47         | 5.49            | 5.56             | 5.28         |       |        |        |                                                                        |
| BIC    | 5.46         | 5.49            | 5.56             | 4.57         |       |        |        |                                                                        |

Table 34: **Prediction MSE for n=100, continuous design, sparse covariates, and decay 100.**

|        | lasso        | GL $\gamma = 1$ | GL $\gamma = 10$ | AL           | MCP   | CVbest | ICbest |                                                                        |
|--------|--------------|-----------------|------------------|--------------|-------|--------|--------|------------------------------------------------------------------------|
| CV.lse | 6.74         | 6.11            | 8.34             | <b>3.77</b>  | 5.04  |        |        | $\text{sd}(\mu)/\sigma = 2$<br>$\rho = 0$<br><i>Oracle : 2.52</i>      |
| CV.min | 4.07         | 3.93            | 5.96             | 3.83         | 3.85  | 3.91   |        |                                                                        |
| AICc   | 4.70         | 4.30            | 4.30             | 3.84         |       |        | 4.30   |                                                                        |
| AIC    | 4.38         | 4.39            | 4.46             | 4.14         |       |        |        |                                                                        |
| BIC    | 4.37         | 4.39            | 4.46             | 4.13         |       |        |        |                                                                        |
| CV.lse | 4.12         | 4.10            | 4.10             | 2.07         | 4.02  |        |        | $\text{sd}(\mu)/\sigma = 2$<br>$\rho = 0.5$<br><i>Oracle : 0.95</i>    |
| CV.min | 3.23         | 3.39            | 3.79             | 1.69         | 3.19  | 3.20   |        |                                                                        |
| AICc   | 3.30         | 3.84            | 1.71             | 2.35         |       |        | 2.40   |                                                                        |
| AIC    | 1.67         | 1.68            | 1.70             | <b>1.64</b>  |       |        |        |                                                                        |
| BIC    | 1.67         | 1.68            | 1.70             | 1.69         |       |        |        |                                                                        |
| CV.lse | 0.84         | 0.81            | 0.74             | 0.61         | 0.71  |        |        | $\text{sd}(\mu)/\sigma = 2$<br>$\rho = 0.9$<br><i>Oracle : 0.21</i>    |
| CV.min | 0.61         | 0.61            | 0.63             | 0.46         | 0.60  | 0.60   |        |                                                                        |
| AICc   | 0.62         | 0.75            | 0.66             | 0.51         |       |        | 0.62   |                                                                        |
| AIC    | 0.37         | 0.37            | 0.38             | <b>0.36</b>  |       |        |        |                                                                        |
| BIC    | 0.37         | 0.38            | 0.38             | 0.59         |       |        |        |                                                                        |
| CV.lse | 17.65        | 17.73           | 17.88            | 14.30        | 17.57 |        |        | $\text{sd}(\mu)/\sigma = 1$<br>$\rho = 0$<br><i>Oracle : 10.05</i>     |
| CV.min | 15.29        | 16.38           | 17.43            | 16.22        | 15.41 | 15.43  |        |                                                                        |
| AICc   | 15.27        | 16.82           | 17.83            | <b>13.78</b> |       |        | 17.13  |                                                                        |
| AIC    | 17.69        | 17.80           | 17.98            | 17.24        |       |        |        |                                                                        |
| BIC    | 17.68        | 17.79           | 17.98            | 17.21        |       |        |        |                                                                        |
| CV.lse | 6.83         | 6.83            | 6.83             | 5.74         | 6.82  |        |        | $\text{sd}(\mu)/\sigma = 1$<br>$\rho = 0.5$<br><i>Oracle : 3.80</i>    |
| CV.min | 6.38         | 6.54            | 6.74             | 6.19         | 6.38  | 6.39   |        |                                                                        |
| AICc   | 6.30         | 6.72            | 6.70             | <b>5.66</b>  |       |        | 6.54   |                                                                        |
| AIC    | 6.71         | 6.74            | 6.80             | 6.59         |       |        |        |                                                                        |
| BIC    | 6.71         | 6.73            | 6.80             | 6.58         |       |        |        |                                                                        |
| CV.lse | 1.53         | 1.52            | 1.50             | 1.33         | 1.49  |        |        | $\text{sd}(\mu)/\sigma = 1$<br>$\rho = 0.9$<br><i>Oracle : 0.86</i>    |
| CV.min | 1.37         | 1.37            | 1.43             | <b>1.25</b>  | 1.35  | 1.35   |        |                                                                        |
| AICc   | 1.35         | 1.49            | 1.45             | <b>1.25</b>  |       |        | 1.35   |                                                                        |
| AIC    | 1.50         | 1.51            | 1.53             | 1.44         |       |        |        |                                                                        |
| BIC    | 1.50         | 1.51            | 1.53             | 1.40         |       |        |        |                                                                        |
| CV.lse | 45.57        | 45.59           | 45.62            | 55.20        | 45.57 |        |        | $\text{sd}(\mu)/\sigma = 0.5$<br>$\rho = 0$<br><i>Oracle : 40.18</i>   |
| CV.min | 45.65        | 45.85           | 45.98            | 66.11        | 45.94 | 46.01  |        |                                                                        |
| AICc   | <b>45.06</b> | 56.09           | 71.78            | 48.00        |       |        | 66.96  |                                                                        |
| AIC    | 70.97        | 71.48           | 72.03            | 69.85        |       |        |        |                                                                        |
| BIC    | 70.94        | 71.46           | 72.01            | 69.82        |       |        |        |                                                                        |
| CV.lse | 17.26        | 17.26           | 17.27            | 20.38        | 17.26 |        |        | $\text{sd}(\mu)/\sigma = 0.5$<br>$\rho = 0.5$<br><i>Oracle : 15.23</i> |
| CV.min | 17.28        | 17.32           | 17.40            | 24.29        | 17.37 | 17.39  |        |                                                                        |
| AICc   | <b>17.13</b> | 17.71           | 27.06            | 18.28        |       |        | 23.99  |                                                                        |
| AIC    | 26.90        | 27.05           | 27.27            | 26.48        |       |        |        |                                                                        |
| BIC    | 26.89        | 27.04           | 27.27            | 26.47        |       |        |        |                                                                        |
| CV.lse | 3.90         | 3.90            | 3.90             | 3.96         | 3.90  |        |        | $\text{sd}(\mu)/\sigma = 0.5$<br>$\rho = 0.9$<br><i>Oracle : 3.44</i>  |
| CV.min | 3.89         | 3.90            | 3.92             | 4.37         | 3.90  | 3.92   |        |                                                                        |
| AICc   | <b>3.86</b>  | 3.90            | 5.99             | 4.06         |       |        | 4.01   |                                                                        |
| AIC    | 6.03         | 6.06            | 6.14             | 5.83         |       |        |        |                                                                        |
| BIC    | 6.03         | 6.06            | 6.13             | 5.05         |       |        |        |                                                                        |

Table 35: **Prediction MSE for n=100, continuous design, sparse covariates, and decay 200.**

|        | lasso        | GL $\gamma = 1$ | GL $\gamma = 10$ | AL           | MCP   | CVbest | ICbest |                                                                        |
|--------|--------------|-----------------|------------------|--------------|-------|--------|--------|------------------------------------------------------------------------|
| CV.lse | 7.14         | 6.46            | 8.81             | <b>3.97</b>  | 5.31  |        |        | $\text{sd}(\mu)/\sigma = 2$<br>$\rho = 0$<br><i>Oracle : 2.65</i>      |
| CV.min | 4.29         | 4.15            | 6.14             | 4.04         | 4.07  | 4.12   |        |                                                                        |
| AICc   | 5.01         | 4.53            | 4.53             | 4.04         |       |        | 4.51   |                                                                        |
| AIC    | 4.62         | 4.63            | 4.71             | 4.36         |       |        |        |                                                                        |
| BIC    | 4.61         | 4.62            | 4.70             | 4.35         |       |        |        |                                                                        |
| CV.lse | 4.35         | 4.31            | 4.32             | 2.18         | 4.24  |        |        | $\text{sd}(\mu)/\sigma = 2$<br>$\rho = 0.5$<br><i>Oracle : 1.00</i>    |
| CV.min | 3.40         | 3.59            | 4.01             | 1.78         | 3.37  | 3.37   |        |                                                                        |
| AICc   | 3.48         | 4.06            | 1.81             | 2.47         |       |        | 2.54   |                                                                        |
| AIC    | 1.77         | 1.77            | 1.79             | <b>1.73</b>  |       |        |        |                                                                        |
| BIC    | 1.77         | 1.77            | 1.79             | 1.79         |       |        |        |                                                                        |
| CV.lse | 0.89         | 0.85            | 0.78             | 0.65         | 0.75  |        |        | $\text{sd}(\mu)/\sigma = 2$<br>$\rho = 0.9$<br><i>Oracle : 0.23</i>    |
| CV.min | 0.64         | 0.64            | 0.67             | 0.49         | 0.63  | 0.63   |        |                                                                        |
| AICc   | 0.66         | 0.79            | 0.69             | 0.54         |       |        | 0.66   |                                                                        |
| AIC    | 0.39         | 0.40            | 0.40             | <b>0.38</b>  |       |        |        |                                                                        |
| BIC    | 0.39         | 0.40            | 0.40             | 0.62         |       |        |        |                                                                        |
| CV.lse | 18.66        | 18.75           | 18.91            | 15.12        | 18.55 |        |        | $\text{sd}(\mu)/\sigma = 1$<br>$\rho = 0$<br><i>Oracle : 10.62</i>     |
| CV.min | 16.14        | 17.34           | 18.41            | 17.11        | 16.33 | 16.36  |        |                                                                        |
| AICc   | 16.16        | 17.75           | 18.84            | <b>14.55</b> |       |        | 18.25  |                                                                        |
| AIC    | 18.68        | 18.80           | 18.99            | 18.21        |       |        |        |                                                                        |
| BIC    | 18.67        | 18.79           | 18.99            | 18.18        |       |        |        |                                                                        |
| CV.lse | 7.19         | 7.19            | 7.19             | 6.05         | 7.19  |        |        | $\text{sd}(\mu)/\sigma = 1$<br>$\rho = 0.5$<br><i>Oracle : 4.01</i>    |
| CV.min | 6.72         | 6.89            | 7.10             | 6.52         | 6.72  | 6.74   |        |                                                                        |
| AICc   | 6.63         | 7.07            | 7.06             | <b>5.96</b>  |       |        | 6.89   |                                                                        |
| AIC    | 7.07         | 7.10            | 7.17             | 6.94         |       |        |        |                                                                        |
| BIC    | 7.07         | 7.10            | 7.17             | 6.93         |       |        |        |                                                                        |
| CV.lse | 1.61         | 1.60            | 1.58             | 1.40         | 1.56  |        |        | $\text{sd}(\mu)/\sigma = 1$<br>$\rho = 0.9$<br><i>Oracle : 0.91</i>    |
| CV.min | 1.45         | 1.45            | 1.50             | <b>1.32</b>  | 1.42  | 1.42   |        |                                                                        |
| AICc   | 1.42         | 1.57            | 1.53             | <b>1.32</b>  |       |        | 1.43   |                                                                        |
| AIC    | 1.59         | 1.59            | 1.61             | 1.52         |       |        |        |                                                                        |
| BIC    | 1.58         | 1.59            | 1.61             | 1.47         |       |        |        |                                                                        |
| CV.lse | 48.12        | 48.15           | 48.19            | 58.23        | 48.13 |        |        | $\text{sd}(\mu)/\sigma = 0.5$<br>$\rho = 0$<br><i>Oracle : 42.43</i>   |
| CV.min | 48.20        | 48.43           | 48.57            | 69.84        | 48.51 | 48.58  |        |                                                                        |
| AICc   | <b>47.6</b>  | 59.96           | 75.78            | 50.67        |       |        | 70.76  |                                                                        |
| AIC    | 74.93        | 75.47           | 76.04            | 73.75        |       |        |        |                                                                        |
| BIC    | 74.89        | 75.44           | 76.03            | 73.72        |       |        |        |                                                                        |
| CV.lse | 18.22        | 18.22           | 18.23            | 21.49        | 18.22 |        |        | $\text{sd}(\mu)/\sigma = 0.5$<br>$\rho = 0.5$<br><i>Oracle : 16.07</i> |
| CV.min | 18.26        | 18.28           | 18.35            | 25.58        | 18.33 | 18.34  |        |                                                                        |
| AICc   | <b>18.08</b> | 18.83           | 28.56            | 19.27        |       |        | 24.76  |                                                                        |
| AIC    | 28.38        | 28.53           | 28.78            | 27.94        |       |        |        |                                                                        |
| BIC    | 28.36        | 28.52           | 28.77            | 27.92        |       |        |        |                                                                        |
| CV.lse | 4.11         | 4.11            | 4.11             | 4.17         | 4.11  |        |        | $\text{sd}(\mu)/\sigma = 0.5$<br>$\rho = 0.9$<br><i>Oracle : 3.62</i>  |
| CV.min | 4.10         | 4.11            | 4.14             | 4.61         | 4.11  | 4.13   |        |                                                                        |
| AICc   | <b>4.07</b>  | 4.11            | 6.32             | 4.28         |       |        | 4.19   |                                                                        |
| AIC    | 6.36         | 6.39            | 6.47             | 6.14         |       |        |        |                                                                        |
| BIC    | 6.36         | 6.39            | 6.47             | 5.28         |       |        |        |                                                                        |

Table 36: Estimation MSE for n=1000, binary design, dense covariates, and decay 10.

|        | lasso    | GL $\gamma = 1$ | GL $\gamma = 10$ | marginal AL | sparsenet MCP |                                                                      |
|--------|----------|-----------------|------------------|-------------|---------------|----------------------------------------------------------------------|
| CV.lse | <b>0</b> | <b>0</b>        | <b>0</b>         | 0.327       | <b>0</b>      | sd( $\mu$ )/ $\sigma = 2$<br>$\rho = 0$<br><i>Oracle</i> : 0.000     |
| CV.min | <b>0</b> | <b>0</b>        | <b>0</b>         | 0.317       | <b>0</b>      |                                                                      |
| AICc   | <b>0</b> | <b>0</b>        | <b>0</b>         | 0.317       |               |                                                                      |
| AIC    | <b>0</b> | <b>0</b>        | <b>0</b>         | 0.317       |               |                                                                      |
| BIC    | <b>0</b> | <b>0</b>        | <b>0</b>         | 0.328       |               |                                                                      |
| CV.lse | <b>0</b> | <b>0</b>        | <b>0</b>         | 0.295       | <b>0</b>      | sd( $\mu$ )/ $\sigma = 2$<br>$\rho = 0.5$<br><i>Oracle</i> : 0.000   |
| CV.min | <b>0</b> | <b>0</b>        | <b>0</b>         | 0.286       | <b>0</b>      |                                                                      |
| AICc   | <b>0</b> | <b>0</b>        | <b>0</b>         | 0.286       |               |                                                                      |
| AIC    | <b>0</b> | <b>0</b>        | <b>0</b>         | 0.286       |               |                                                                      |
| BIC    | <b>0</b> | <b>0</b>        | <b>0</b>         | 0.297       |               |                                                                      |
| CV.lse | <b>0</b> | <b>0</b>        | <b>0</b>         | 0.281       | <b>0</b>      | sd( $\mu$ )/ $\sigma = 2$<br>$\rho = 0.9$<br><i>Oracle</i> : 0.000   |
| CV.min | <b>0</b> | <b>0</b>        | <b>0</b>         | 0.272       | <b>0</b>      |                                                                      |
| AICc   | <b>0</b> | <b>0</b>        | <b>0</b>         | 0.272       |               |                                                                      |
| AIC    | <b>0</b> | <b>0</b>        | <b>0</b>         | 0.272       |               |                                                                      |
| BIC    | <b>0</b> | <b>0</b>        | <b>0</b>         | 0.283       |               |                                                                      |
| CV.lse | <b>0</b> | <b>0</b>        | <b>0</b>         | 1.246       | <b>0</b>      | sd( $\mu$ )/ $\sigma = 1$<br>$\rho = 0$<br><i>Oracle</i> : 0.000     |
| CV.min | <b>0</b> | <b>0</b>        | <b>0</b>         | 1.276       | <b>0</b>      |                                                                      |
| AICc   | <b>0</b> | <b>0</b>        | <b>0</b>         | 1.266       |               |                                                                      |
| AIC    | 0.010    | 0.010           | 0.013            | 1.313       |               |                                                                      |
| BIC    | <b>0</b> | <b>0</b>        | <b>0</b>         | 1.267       |               |                                                                      |
| CV.lse | <b>0</b> | <b>0</b>        | <b>0</b>         | 1.118       | <b>0</b>      | sd( $\mu$ )/ $\sigma = 1$<br>$\rho = 0.5$<br><i>Oracle</i> : 0.000   |
| CV.min | <b>0</b> | <b>0</b>        | <b>0</b>         | 1.146       | <b>0</b>      |                                                                      |
| AICc   | <b>0</b> | <b>0</b>        | <b>0</b>         | 1.135       |               |                                                                      |
| AIC    | 0.009    | 0.010           | 0.011            | 1.180       |               |                                                                      |
| BIC    | <b>0</b> | <b>0</b>        | <b>0</b>         | 1.142       |               |                                                                      |
| CV.lse | <b>0</b> | <b>0</b>        | <b>0</b>         | 1.063       | <b>0</b>      | sd( $\mu$ )/ $\sigma = 1$<br>$\rho = 0.9$<br><i>Oracle</i> : 0.000   |
| CV.min | <b>0</b> | <b>0</b>        | <b>0</b>         | 1.084       | <b>0</b>      |                                                                      |
| AICc   | <b>0</b> | <b>0</b>        | <b>0</b>         | 1.078       |               |                                                                      |
| AIC    | 0.008    | 0.009           | 0.010            | 1.114       |               |                                                                      |
| BIC    | <b>0</b> | <b>0</b>        | <b>0</b>         | 1.086       |               |                                                                      |
| CV.lse | <b>0</b> | <b>0</b>        | <b>0</b>         | 4.898       | <b>0</b>      | sd( $\mu$ )/ $\sigma = 0.5$<br>$\rho = 0$<br><i>Oracle</i> : 0.000   |
| CV.min | <b>0</b> | <b>0</b>        | <b>0</b>         | 5.206       | <b>0</b>      |                                                                      |
| AICc   | <b>0</b> | <b>0</b>        | 0.002            | 5.084       |               |                                                                      |
| AIC    | 0.049    | 0.060           | 0.124            | 6.069       |               |                                                                      |
| BIC    | <b>0</b> | <b>0</b>        | <b>0</b>         | 4.955       |               |                                                                      |
| CV.lse | <b>0</b> | <b>0</b>        | <b>0</b>         | 4.394       | <b>0</b>      | sd( $\mu$ )/ $\sigma = 0.5$<br>$\rho = 0.5$<br><i>Oracle</i> : 0.000 |
| CV.min | <b>0</b> | <b>0</b>        | <b>0</b>         | 4.670       | <b>0</b>      |                                                                      |
| AICc   | <b>0</b> | <b>0</b>        | 0.002            | 4.552       |               |                                                                      |
| AIC    | 0.044    | 0.052           | 0.106            | 5.443       |               |                                                                      |
| BIC    | <b>0</b> | <b>0</b>        | <b>0</b>         | 4.459       |               |                                                                      |
| CV.lse | <b>0</b> | <b>0</b>        | <b>0</b>         | 4.169       | <b>0</b>      | sd( $\mu$ )/ $\sigma = 0.5$<br>$\rho = 0.9$<br><i>Oracle</i> : 0.000 |
| CV.min | <b>0</b> | <b>0</b>        | <b>0</b>         | 4.402       | <b>0</b>      |                                                                      |
| AICc   | <b>0</b> | <b>0</b>        | 0.002            | 4.310       |               |                                                                      |
| AIC    | 0.038    | 0.046           | 0.093            | 5.079       |               |                                                                      |
| BIC    | <b>0</b> | <b>0</b>        | <b>0</b>         | 4.234       |               |                                                                      |

Table 37: Estimation MSE for n=1000, binary design, dense covariates, and decay 50.

|        | lasso       | GL $\gamma = 1$ | GL $\gamma = 10$ | marginal AL | sparsenet MCP |                                                                        |
|--------|-------------|-----------------|------------------|-------------|---------------|------------------------------------------------------------------------|
| CV.lse | 0.001       | <b>0</b>        | 0.001            | 2.152       | <b>0</b>      | $\text{sd}(\mu)/\sigma = 2$<br>$\rho = 0$<br><i>Oracle</i> : 0.000     |
| CV.min | <b>0</b>    | <b>0</b>        | <b>0</b>         | 2.073       | <b>0</b>      |                                                                        |
| AICc   | <b>0</b>    | <b>0</b>        | 0.001            | 2.086       |               |                                                                        |
| AIC    | 0.011       | 0.012           | 0.021            | 2.074       |               |                                                                        |
| BIC    | 0.009       | 0.007           | 0.003            | 2.466       |               |                                                                        |
| CV.lse | 0.001       | <b>0</b>        | <b>0</b>         | 1.950       | <b>0</b>      | $\text{sd}(\mu)/\sigma = 2$<br>$\rho = 0.5$<br><i>Oracle</i> : 0.000   |
| CV.min | <b>0</b>    | <b>0</b>        | <b>0</b>         | 1.872       | <b>0</b>      |                                                                        |
| AICc   | <b>0</b>    | <b>0</b>        | <b>0</b>         | 1.886       |               |                                                                        |
| AIC    | 0.010       | 0.011           | 0.018            | 1.871       |               |                                                                        |
| BIC    | 0.010       | 0.008           | 0.002            | 2.266       |               |                                                                        |
| CV.lse | <b>0</b>    | <b>0</b>        | <b>0</b>         | 1.853       | <b>0</b>      | $\text{sd}(\mu)/\sigma = 2$<br>$\rho = 0.9$<br><i>Oracle</i> : 0.000   |
| CV.min | <b>0</b>    | <b>0</b>        | <b>0</b>         | 1.775       | <b>0</b>      |                                                                        |
| AICc   | <b>0</b>    | <b>0</b>        | <b>0</b>         | 1.789       |               |                                                                        |
| AIC    | 0.010       | 0.010           | 0.016            | 1.771       |               |                                                                        |
| BIC    | 0.010       | 0.008           | 0.002            | 2.165       |               |                                                                        |
| CV.lse | <b>0.01</b> | <b>0.01</b>     | 0.012            | 7.835       | 0.011         | $\text{sd}(\mu)/\sigma = 1$<br>$\rho = 0$<br><i>Oracle</i> : 0.001     |
| CV.min | <b>0.01</b> | <b>0.01</b>     | 0.011            | 7.853       | <b>0.01</b>   |                                                                        |
| AICc   | <b>0.01</b> | <b>0.01</b>     | 0.018            | 7.797       |               |                                                                        |
| AIC    | 0.065       | 0.081           | 0.167            | 8.518       |               |                                                                        |
| BIC    | 0.018       | 0.016           | 0.018            | 8.899       |               |                                                                        |
| CV.lse | <b>0.01</b> | <b>0.01</b>     | 0.011            | 7.048       | <b>0.01</b>   | $\text{sd}(\mu)/\sigma = 1$<br>$\rho = 0.5$<br><i>Oracle</i> : 0.000   |
| CV.min | <b>0.01</b> | <b>0.01</b>     | <b>0.01</b>      | 7.049       | <b>0.01</b>   |                                                                        |
| AICc   | <b>0.01</b> | <b>0.01</b>     | 0.015            | 7.009       |               |                                                                        |
| AIC    | 0.058       | 0.071           | 0.143            | 7.652       |               |                                                                        |
| BIC    | 0.019       | 0.017           | 0.018            | 8.140       |               |                                                                        |
| CV.lse | <b>0.01</b> | <b>0.01</b>     | 0.012            | 6.691       | <b>0.01</b>   | $\text{sd}(\mu)/\sigma = 1$<br>$\rho = 0.9$<br><i>Oracle</i> : 0.000   |
| CV.min | <b>0.01</b> | <b>0.01</b>     | <b>0.01</b>      | 6.666       | <b>0.01</b>   |                                                                        |
| AICc   | <b>0.01</b> | <b>0.01</b>     | 0.014            | 6.640       |               |                                                                        |
| AIC    | 0.051       | 0.063           | 0.126            | 7.179       |               |                                                                        |
| BIC    | 0.019       | 0.017           | 0.018            | 7.765       |               |                                                                        |
| CV.lse | <b>0.02</b> | <b>0.02</b>     | <b>0.02</b>      | 28.909      | <b>0.02</b>   | $\text{sd}(\mu)/\sigma = 0.5$<br>$\rho = 0$<br><i>Oracle</i> : 0.011   |
| CV.min | <b>0.02</b> | 0.021           | 0.022            | 30.228      | <b>0.02</b>   |                                                                        |
| AICc   | <b>0.02</b> | 0.023           | 0.042            | 29.490      |               |                                                                        |
| AIC    | 0.366       | 0.541           | 1.226            | 36.584      |               |                                                                        |
| BIC    | <b>0.02</b> | <b>0.02</b>     | <b>0.02</b>      | 30.299      |               |                                                                        |
| CV.lse | <b>0.02</b> | <b>0.02</b>     | <b>0.02</b>      | 25.851      | <b>0.02</b>   | $\text{sd}(\mu)/\sigma = 0.5$<br>$\rho = 0.5$<br><i>Oracle</i> : 0.010 |
| CV.min | <b>0.02</b> | <b>0.02</b>     | 0.021            | 26.996      | <b>0.02</b>   |                                                                        |
| AICc   | <b>0.02</b> | 0.022           | 0.044            | 26.364      |               |                                                                        |
| AIC    | 0.321       | 0.465           | 1.038            | 32.773      |               |                                                                        |
| BIC    | <b>0.02</b> | <b>0.02</b>     | <b>0.02</b>      | 26.972      |               |                                                                        |
| CV.lse | <b>0.02</b> | <b>0.02</b>     | <b>0.02</b>      | 24.469      | <b>0.02</b>   | $\text{sd}(\mu)/\sigma = 0.5$<br>$\rho = 0.9$<br><i>Oracle</i> : 0.010 |
| CV.min | <b>0.02</b> | <b>0.02</b>     | 0.021            | 25.451      | <b>0.02</b>   |                                                                        |
| AICc   | <b>0.02</b> | 0.021           | 0.037            | 24.912      |               |                                                                        |
| AIC    | 0.282       | 0.409           | 0.913            | 30.656      |               |                                                                        |
| BIC    | <b>0.02</b> | <b>0.02</b>     | <b>0.02</b>      | 25.452      |               |                                                                        |

Table 38: Estimation MSE for n=1000, binary design, dense covariates, and decay 100.

|        | lasso        | GL $\gamma = 1$ | GL $\gamma = 10$ | marginal AL | sparsenet MCP |                                                                        |
|--------|--------------|-----------------|------------------|-------------|---------------|------------------------------------------------------------------------|
| CV.lse | 0.012        | 0.012           | 0.014            | 4.956       | <b>0.011</b>  | $\text{sd}(\mu)/\sigma = 2$<br>$\rho = 0$<br><i>Oracle</i> : 0.004     |
| CV.min | <b>0.011</b> | <b>0.011</b>    | 0.012            | 4.695       | <b>0.011</b>  |                                                                        |
| AICc   | 0.012        | <b>0.011</b>    | 0.014            | 4.815       |               |                                                                        |
| AIC    | 0.028        | 0.033           | 0.060            | 4.645       |               |                                                                        |
| BIC    | 0.038        | 0.024           | 0.018            | 6.801       |               |                                                                        |
| CV.lse | 0.012        | 0.011           | 0.013            | 4.503       | 0.011         | $\text{sd}(\mu)/\sigma = 2$<br>$\rho = 0.5$<br><i>Oracle</i> : 0.003   |
| CV.min | 0.011        | <b>0.01</b>     | 0.011            | 4.251       | <b>0.01</b>   |                                                                        |
| AICc   | 0.012        | 0.011           | 0.012            | 4.374       |               |                                                                        |
| AIC    | 0.025        | 0.029           | 0.051            | 4.189       |               |                                                                        |
| BIC    | 0.044        | 0.026           | 0.016            | 6.478       |               |                                                                        |
| CV.lse | 0.011        | 0.011           | 0.012            | 4.298       | <b>0.01</b>   | $\text{sd}(\mu)/\sigma = 2$<br>$\rho = 0.9$<br><i>Oracle</i> : 0.001   |
| CV.min | <b>0.01</b>  | <b>0.01</b>     | 0.011            | 4.038       | <b>0.01</b>   |                                                                        |
| AICc   | 0.012        | <b>0.01</b>     | 0.011            | 4.166       |               |                                                                        |
| AIC    | 0.022        | 0.026           | 0.045            | 3.966       |               |                                                                        |
| BIC    | 0.045        | 0.027           | 0.016            | 6.314       |               |                                                                        |
| CV.lse | 0.033        | 0.036           | 0.047            | 17.232      | 0.032         | $\text{sd}(\mu)/\sigma = 1$<br>$\rho = 0$<br><i>Oracle</i> : 0.013     |
| CV.min | <b>0.029</b> | 0.031           | 0.044            | 17.042      | <b>0.029</b>  |                                                                        |
| AICc   | 0.030        | 0.031           | 0.058            | 17.035      |               |                                                                        |
| AIC    | 0.153        | 0.206           | 0.438            | 18.371      |               |                                                                        |
| BIC    | 0.050        | 0.049           | 0.050            | 22.969      |               |                                                                        |
| CV.lse | 0.034        | 0.036           | 0.047            | 15.520      | 0.033         | $\text{sd}(\mu)/\sigma = 1$<br>$\rho = 0.5$<br><i>Oracle</i> : 0.012   |
| CV.min | <b>0.029</b> | 0.030           | 0.042            | 15.309      | <b>0.029</b>  |                                                                        |
| AICc   | 0.030        | 0.030           | 0.052            | 15.325      |               |                                                                        |
| AIC    | 0.135        | 0.178           | 0.371            | 16.446      |               |                                                                        |
| BIC    | 0.050        | 0.050           | 0.050            | 20.830      |               |                                                                        |
| CV.lse | 0.034        | 0.036           | 0.047            | 14.725      | 0.033         | $\text{sd}(\mu)/\sigma = 1$<br>$\rho = 0.9$<br><i>Oracle</i> : 0.010   |
| CV.min | <b>0.029</b> | 0.030           | 0.041            | 14.478      | <b>0.029</b>  |                                                                        |
| AICc   | 0.030        | <b>0.029</b>    | 0.048            | 14.519      |               |                                                                        |
| AIC    | 0.119        | 0.157           | 0.326            | 15.468      |               |                                                                        |
| BIC    | 0.050        | 0.050           | 0.050            | 19.694      |               |                                                                        |
| CV.lse | 0.050        | 0.050           | 0.050            | 59.962      | 0.050         | $\text{sd}(\mu)/\sigma = 0.5$<br>$\rho = 0$<br><i>Oracle</i> : 0.035   |
| CV.min | 0.048        | 0.050           | 0.051            | 62.566      | 0.048         |                                                                        |
| AICc   | <b>0.047</b> | 0.064           | 0.084            | 60.970      |               |                                                                        |
| AIC    | 0.787        | 1.298           | 2.923            | 76.055      |               |                                                                        |
| BIC    | 0.050        | 0.050           | 0.050            | 61.780      |               |                                                                        |
| CV.lse | 0.050        | 0.050           | 0.050            | 53.461      | 0.050         | $\text{sd}(\mu)/\sigma = 0.5$<br>$\rho = 0.5$<br><i>Oracle</i> : 0.032 |
| CV.min | <b>0.048</b> | 0.050           | 0.050            | 55.742      | <b>0.048</b>  |                                                                        |
| AICc   | <b>0.048</b> | 0.059           | 0.086            | 54.383      |               |                                                                        |
| AIC    | 0.685        | 1.102           | 2.446            | 67.971      |               |                                                                        |
| BIC    | 0.050        | 0.050           | 0.050            | 54.813      |               |                                                                        |
| CV.lse | 0.050        | 0.050           | 0.050            | 50.504      | 0.050         | $\text{sd}(\mu)/\sigma = 0.5$<br>$\rho = 0.9$<br><i>Oracle</i> : 0.030 |
| CV.min | 0.049        | 0.050           | 0.050            | 52.515      | 0.049         |                                                                        |
| AICc   | <b>0.048</b> | 0.058           | 0.077            | 51.289      |               |                                                                        |
| AIC    | 0.599        | 0.962           | 2.148            | 63.527      |               |                                                                        |
| BIC    | 0.050        | 0.050           | 0.050            | 51.622      |               |                                                                        |

Table 39: Estimation MSE for n=1000, binary design, dense covariates, and decay 200.

|        | lasso        | GL $\gamma = 1$ | GL $\gamma = 10$ | marginal AL | sparsenet MCP |                                                                        |
|--------|--------------|-----------------|------------------|-------------|---------------|------------------------------------------------------------------------|
| CV.lse | 0.045        | 0.051           | 0.073            | 11.519      | 0.044         | $\text{sd}(\mu)/\sigma = 2$<br>$\rho = 0$<br><i>Oracle</i> : 0.022     |
| CV.min | <b>0.041</b> | 0.045           | 0.064            | 10.643      | <b>0.041</b>  |                                                                        |
| AICc   | 0.050        | 0.049           | 0.063            | 11.423      |               |                                                                        |
| AIC    | 0.073        | 0.091           | 0.165            | 10.286      |               |                                                                        |
| BIC    | 0.100        | 0.100           | 0.084            | 28.560      |               |                                                                        |
| CV.lse | 0.046        | 0.050           | 0.070            | 10.534      | 0.044         | $\text{sd}(\mu)/\sigma = 2$<br>$\rho = 0.5$<br><i>Oracle</i> : 0.020   |
| CV.min | 0.040        | 0.043           | 0.061            | 9.689       | <b>0.039</b>  |                                                                        |
| AICc   | 0.051        | 0.048           | 0.056            | 10.446      |               |                                                                        |
| AIC    | 0.065        | 0.079           | 0.141            | 9.284       |               |                                                                        |
| BIC    | 0.100        | 0.100           | 0.086            | 26.122      |               |                                                                        |
| CV.lse | 0.044        | 0.048           | 0.068            | 10.077      | 0.042         | $\text{sd}(\mu)/\sigma = 2$<br>$\rho = 0.9$<br><i>Oracle</i> : 0.020   |
| CV.min | 0.038        | 0.041           | 0.057            | 9.205       | <b>0.037</b>  |                                                                        |
| AICc   | 0.051        | 0.046           | 0.052            | 9.991       |               |                                                                        |
| AIC    | 0.058        | 0.071           | 0.125            | 8.774       |               |                                                                        |
| BIC    | 0.100        | 0.100           | 0.085            | 24.745      |               |                                                                        |
| CV.lse | 0.085        | 0.097           | 0.100            | 37.260      | 0.085         | $\text{sd}(\mu)/\sigma = 1$<br>$\rho = 0$<br><i>Oracle</i> : 0.051     |
| CV.min | <b>0.076</b> | 0.092           | 0.102            | 36.419      | <b>0.076</b>  |                                                                        |
| AICc   | 0.079        | 0.090           | 0.174            | 36.800      |               |                                                                        |
| AIC    | 0.341        | 0.501           | 1.066            | 38.733      |               |                                                                        |
| BIC    | 0.100        | 0.100           | 0.100            | 49.271      |               |                                                                        |
| CV.lse | 0.088        | 0.098           | 0.100            | 33.534      | 0.087         | $\text{sd}(\mu)/\sigma = 1$<br>$\rho = 0.5$<br><i>Oracle</i> : 0.046   |
| CV.min | <b>0.076</b> | 0.090           | 0.101            | 32.694      | <b>0.076</b>  |                                                                        |
| AICc   | 0.080        | 0.085           | 0.155            | 33.103      |               |                                                                        |
| AIC    | 0.299        | 0.430           | 0.902            | 34.602      |               |                                                                        |
| BIC    | 0.100        | 0.100           | 0.100            | 43.762      |               |                                                                        |
| CV.lse | 0.089        | 0.097           | 0.100            | 31.823      | 0.088         | $\text{sd}(\mu)/\sigma = 1$<br>$\rho = 0.9$<br><i>Oracle</i> : 0.043   |
| CV.min | <b>0.075</b> | 0.089           | 0.100            | 30.897      | <b>0.075</b>  |                                                                        |
| AICc   | 0.080        | 0.083           | 0.140            | 31.341      |               |                                                                        |
| AIC    | 0.263        | 0.377           | 0.791            | 32.503      |               |                                                                        |
| BIC    | 0.100        | 0.100           | 0.100            | 41.208      |               |                                                                        |
| CV.lse | <b>0.1</b>   | <b>0.1</b>      | <b>0.1</b>       | 122.287     | <b>0.1</b>    | $\text{sd}(\mu)/\sigma = 0.5$<br>$\rho = 0$<br><i>Oracle</i> : 0.101   |
| CV.min | <b>0.1</b>   | 0.101           | 0.102            | 127.558     | <b>0.1</b>    |                                                                        |
| AICc   | <b>0.1</b>   | 0.170           | 0.142            | 124.377     |               |                                                                        |
| AIC    | 1.633        | 3.025           | 6.593            | 155.355     |               |                                                                        |
| BIC    | <b>0.1</b>   | <b>0.1</b>      | 0.263            | 124.518     |               |                                                                        |
| CV.lse | <b>0.1</b>   | <b>0.1</b>      | <b>0.1</b>       | 108.720     | <b>0.1</b>    | $\text{sd}(\mu)/\sigma = 0.5$<br>$\rho = 0.5$<br><i>Oracle</i> : 0.093 |
| CV.min | <b>0.1</b>   | 0.101           | 0.101            | 113.445     | <b>0.1</b>    |                                                                        |
| AICc   | <b>0.1</b>   | 0.151           | 0.136            | 110.585     |               |                                                                        |
| AIC    | 1.417        | 2.558           | 5.552            | 138.308     |               |                                                                        |
| BIC    | <b>0.1</b>   | <b>0.1</b>      | 0.130            | 110.289     |               |                                                                        |
| CV.lse | <b>0.1</b>   | <b>0.1</b>      | <b>0.1</b>       | 102.616     | <b>0.1</b>    | $\text{sd}(\mu)/\sigma = 0.5$<br>$\rho = 0.9$<br><i>Oracle</i> : 0.088 |
| CV.min | <b>0.1</b>   | 0.101           | 0.101            | 106.748     | <b>0.1</b>    |                                                                        |
| AICc   | <b>0.1</b>   | 0.143           | 0.131            | 104.334     |               |                                                                        |
| AIC    | 1.238        | 2.230           | 4.877            | 129.462     |               |                                                                        |
| BIC    | <b>0.1</b>   | <b>0.1</b>      | 0.133            | 103.847     |               |                                                                        |

Table 40: Estimation MSE for n=1000, continuous design, dense covariates, and decay 10.

|        | lasso | GL $\gamma = 1$ | GL $\gamma = 10$ | marginal AL | sparsenet MCP |                                                                      |
|--------|-------|-----------------|------------------|-------------|---------------|----------------------------------------------------------------------|
| CV.lse | 0     | 0               | 0                | 1.315       | 0             | sd( $\mu$ )/ $\sigma = 2$<br>$\rho = 0$<br><i>Oracle</i> : 0.000     |
| CV.min | 0     | 0               | 0                | 1.273       | 0             |                                                                      |
| AICc   | 0     | 0               | 0                | 1.274       |               |                                                                      |
| AIC    | 0     | 0               | 0                | 1.273       |               |                                                                      |
| BIC    | 0     | 0               | 0                | 1.319       |               |                                                                      |
| CV.lse | 0     | 0               | 0                | 0.610       | 0             | sd( $\mu$ )/ $\sigma = 2$<br>$\rho = 0.5$<br><i>Oracle</i> : 0.000   |
| CV.min | 0     | 0               | 0                | 0.586       | 0             |                                                                      |
| AICc   | 0     | 0               | 0                | 0.586       |               |                                                                      |
| AIC    | 0     | 0               | 0                | 0.586       |               |                                                                      |
| BIC    | 0     | 0               | 0                | 0.606       |               |                                                                      |
| CV.lse | 0     | 0               | 0                | 0.174       | 0             | sd( $\mu$ )/ $\sigma = 2$<br>$\rho = 0.9$<br><i>Oracle</i> : 0.000   |
| CV.min | 0     | 0               | 0                | 0.167       | 0             |                                                                      |
| AICc   | 0     | 0               | 0                | 0.167       |               |                                                                      |
| AIC    | 0     | 0               | 0                | 0.167       |               |                                                                      |
| BIC    | 0     | 0               | 0                | 0.167       |               |                                                                      |
| CV.lse | 0     | 0               | 0                | 5.000       | 0             | sd( $\mu$ )/ $\sigma = 1$<br>$\rho = 0$<br><i>Oracle</i> : 0.000     |
| CV.min | 0     | 0               | 0                | 5.128       | 0             |                                                                      |
| AICc   | 0     | 0               | 0                | 5.078       |               |                                                                      |
| AIC    | 0.009 | 0.010           | 0.010            | 5.273       |               |                                                                      |
| BIC    | 0     | 0               | 0                | 5.090       |               |                                                                      |
| CV.lse | 0     | 0               | 0                | 2.083       | 0             | sd( $\mu$ )/ $\sigma = 1$<br>$\rho = 0.5$<br><i>Oracle</i> : 0.000   |
| CV.min | 0     | 0               | 0                | 2.069       | 0             |                                                                      |
| AICc   | 0     | 0               | 0                | 2.065       |               |                                                                      |
| AIC    | 0     | 0               | 0.001            | 2.075       |               |                                                                      |
| BIC    | 0     | 0               | 0                | 2.230       |               |                                                                      |
| CV.lse | 0     | 0               | 0                | 0.544       | 0             | sd( $\mu$ )/ $\sigma = 1$<br>$\rho = 0.9$<br><i>Oracle</i> : 0.000   |
| CV.min | 0     | 0               | 0                | 0.523       | 0             |                                                                      |
| AICc   | 0     | 0               | 0                | 0.523       |               |                                                                      |
| AIC    | 0     | 0               | 0                | 0.523       |               |                                                                      |
| BIC    | 0     | 0               | 0                | 0.537       |               |                                                                      |
| CV.lse | 0     | 0               | 0                | 19.703      | 0             | sd( $\mu$ )/ $\sigma = 0.5$<br>$\rho = 0$<br><i>Oracle</i> : 0.000   |
| CV.min | 0     | 0               | 0                | 20.923      | 0             |                                                                      |
| AICc   | 0     | 0               | 0                | 20.418      |               |                                                                      |
| AIC    | 0.040 | 0.048           | 0.099            | 24.317      |               |                                                                      |
| BIC    | 0     | 0               | 0                | 19.916      |               |                                                                      |
| CV.lse | 0     | 0               | 0                | 7.931       | 0             | sd( $\mu$ )/ $\sigma = 0.5$<br>$\rho = 0.5$<br><i>Oracle</i> : 0.000 |
| CV.min | 0     | 0               | 0                | 8.186       | 0             |                                                                      |
| AICc   | 0     | 0               | 0                | 8.095       |               |                                                                      |
| AIC    | 0.019 | 0.021           | 0.042            | 8.893       |               |                                                                      |
| BIC    | 0     | 0               | 0                | 8.112       |               |                                                                      |
| CV.lse | 0     | 0               | 0                | 2.050       | 0             | sd( $\mu$ )/ $\sigma = 0.5$<br>$\rho = 0.9$<br><i>Oracle</i> : 0.000 |
| CV.min | 0     | 0               | 0                | 2.023       | 0             |                                                                      |
| AICc   | 0     | 0               | 0                | 2.025       |               |                                                                      |
| AIC    | 0.009 | 0.010           | 0.019            | 2.034       |               |                                                                      |
| BIC    | 0     | 0               | 0                | 2.065       |               |                                                                      |



Table 41: Estimation MSE for n=1000, continuous design, dense covariates, and decay 50.

|        | lasso       | GL $\gamma = 1$ | GL $\gamma = 10$ | marginal AL | sparsenet MCP |                                                                      |
|--------|-------------|-----------------|------------------|-------------|---------------|----------------------------------------------------------------------|
| CV.lse | <b>0</b>    | <b>0</b>        | <b>0</b>         | 8.620       | <b>0</b>      | sd( $\mu$ )/ $\sigma = 2$<br>$\rho = 0$<br><i>Oracle</i> : 0.000     |
| CV.min | <b>0</b>    | <b>0</b>        | <b>0</b>         | 8.311       | <b>0</b>      |                                                                      |
| AICc   | <b>0</b>    | <b>0</b>        | <b>0</b>         | 8.361       |               |                                                                      |
| AIC    | 0.010       | 0.010           | 0.018            | 8.317       |               |                                                                      |
| BIC    | 0.009       | 0.007           | 0.004            | 9.857       |               |                                                                      |
| CV.lse | 0.005       | 0.002           | <b>0</b>         | 3.801       | <b>0</b>      | sd( $\mu$ )/ $\sigma = 2$<br>$\rho = 0.5$<br><i>Oracle</i> : 0.000   |
| CV.min | <b>0</b>    | <b>0</b>        | <b>0</b>         | 3.525       | <b>0</b>      |                                                                      |
| AICc   | 0.005       | <b>0</b>        | <b>0</b>         | 3.595       |               |                                                                      |
| AIC    | 0.002       | 0.003           | 0.010            | 3.490       |               |                                                                      |
| BIC    | 0.016       | 0.011           | 0.006            | 5.592       |               |                                                                      |
| CV.lse | 0.008       | 0.005           | 0.001            | 1.172       | 0.001         | sd( $\mu$ )/ $\sigma = 2$<br>$\rho = 0.9$<br><i>Oracle</i> : 0.000   |
| CV.min | 0.001       | <b>0</b>        | <b>0</b>         | 1.100       | <b>0</b>      |                                                                      |
| AICc   | 0.009       | 0.005           | <b>0</b>         | 1.101       |               |                                                                      |
| AIC    | 0.001       | <b>0</b>        | <b>0</b>         | 1.101       |               |                                                                      |
| BIC    | 0.020       | 0.020           | 0.020            | 1.249       |               |                                                                      |
| CV.lse | <b>0.01</b> | <b>0.01</b>     | 0.011            | 31.413      | <b>0.01</b>   | sd( $\mu$ )/ $\sigma = 1$<br>$\rho = 0$<br><i>Oracle</i> : 0.000     |
| CV.min | <b>0.01</b> | <b>0.01</b>     | <b>0.01</b>      | 31.517      | <b>0.01</b>   |                                                                      |
| AICc   | <b>0.01</b> | <b>0.01</b>     | 0.012            | 31.267      |               |                                                                      |
| AIC    | 0.052       | 0.065           | 0.133            | 34.153      |               |                                                                      |
| BIC    | 0.018       | 0.017           | 0.020            | 35.773      |               |                                                                      |
| CV.lse | 0.017       | 0.014           | 0.013            | 12.681      | 0.011         | sd( $\mu$ )/ $\sigma = 1$<br>$\rho = 0.5$<br><i>Oracle</i> : 0.000   |
| CV.min | <b>0.01</b> | <b>0.01</b>     | 0.011            | 12.242      | <b>0.01</b>   |                                                                      |
| AICc   | 0.012       | <b>0.01</b>     | <b>0.01</b>      | 12.337      |               |                                                                      |
| AIC    | 0.026       | 0.030           | 0.058            | 12.454      |               |                                                                      |
| BIC    | 0.020       | 0.020           | 0.020            | 16.238      |               |                                                                      |
| CV.lse | 0.020       | 0.019           | 0.018            | 2.504       | 0.013         | sd( $\mu$ )/ $\sigma = 1$<br>$\rho = 0.9$<br><i>Oracle</i> : 0.000   |
| CV.min | 0.017       | 0.015           | 0.015            | 2.349       | 0.011         |                                                                      |
| AICc   | 0.019       | 0.018           | 0.017            | 2.352       |               |                                                                      |
| AIC    | <b>0.01</b> | <b>0.01</b>     | 0.017            | 2.342       |               |                                                                      |
| BIC    | 0.020       | 0.020           | 0.020            | 2.786       |               |                                                                      |
| CV.lse | <b>0.02</b> | <b>0.02</b>     | <b>0.02</b>      | 116.202     | <b>0.02</b>   | sd( $\mu$ )/ $\sigma = 0.5$<br>$\rho = 0$<br><i>Oracle</i> : 0.010   |
| CV.min | <b>0.02</b> | <b>0.02</b>     | 0.021            | 121.387     | <b>0.02</b>   |                                                                      |
| AICc   | <b>0.02</b> | <b>0.02</b>     | <b>0.02</b>      | 118.438     |               |                                                                      |
| AIC    | 0.291       | 0.430           | 0.972            | 146.789     |               |                                                                      |
| BIC    | <b>0.02</b> | <b>0.02</b>     | <b>0.02</b>      | 121.842     |               |                                                                      |
| CV.lse | <b>0.02</b> | <b>0.02</b>     | <b>0.02</b>      | 41.750      | <b>0.02</b>   | sd( $\mu$ )/ $\sigma = 0.5$<br>$\rho = 0.5$<br><i>Oracle</i> : 0.010 |
| CV.min | <b>0.02</b> | <b>0.02</b>     | <b>0.02</b>      | 43.030      | <b>0.02</b>   |                                                                      |
| AICc   | <b>0.02</b> | <b>0.02</b>     | <b>0.02</b>      | 42.506      |               |                                                                      |
| AIC    | 0.144       | 0.197           | 0.433            | 50.747      |               |                                                                      |
| BIC    | <b>0.02</b> | <b>0.02</b>     | <b>0.02</b>      | 42.059      |               |                                                                      |
| CV.lse | <b>0.02</b> | <b>0.02</b>     | <b>0.02</b>      | 7.597       | <b>0.02</b>   | sd( $\mu$ )/ $\sigma = 0.5$<br>$\rho = 0.9$<br><i>Oracle</i> : 0.010 |
| CV.min | <b>0.02</b> | <b>0.02</b>     | <b>0.02</b>      | 7.502       | <b>0.02</b>   |                                                                      |
| AICc   | <b>0.02</b> | <b>0.02</b>     | <b>0.02</b>      | 7.521       |               |                                                                      |
| AIC    | 0.049       | 0.065           | 0.150            | 7.602       |               |                                                                      |
| BIC    | <b>0.02</b> | <b>0.02</b>     | <b>0.02</b>      | 7.478       |               |                                                                      |

Table 42: Estimation MSE for n=1000, continuous design, dense covariates, and decay 100.

|        | lasso        | GL $\gamma = 1$ | GL $\gamma = 10$ | marginal AL | sparsenet MCP |                                                                 |
|--------|--------------|-----------------|------------------|-------------|---------------|-----------------------------------------------------------------|
| CV.lse | <b>0.01</b>  | <b>0.01</b>     | 0.012            | 19.847      | <b>0.01</b>   | $sd(\mu)/\sigma = 2$<br>$\rho = 0$<br><i>Oracle</i> : 0.001     |
| CV.min | <b>0.01</b>  | <b>0.01</b>     | <b>0.01</b>      | 18.825      | <b>0.01</b>   |                                                                 |
| AICc   | <b>0.01</b>  | <b>0.01</b>     | <b>0.01</b>      | 19.301      |               |                                                                 |
| AIC    | 0.022        | 0.027           | 0.048            | 18.624      |               |                                                                 |
| BIC    | 0.037        | 0.025           | 0.017            | 27.156      |               |                                                                 |
| CV.lse | 0.016        | 0.013           | 0.011            | 9.114       | 0.011         | $sd(\mu)/\sigma = 2$<br>$\rho = 0.5$<br><i>Oracle</i> : 0.000   |
| CV.min | <b>0.01</b>  | <b>0.01</b>     | <b>0.01</b>      | 8.028       | <b>0.01</b>   |                                                                 |
| AICc   | 0.019        | 0.014           | <b>0.01</b>      | 8.657       |               |                                                                 |
| AIC    | 0.011        | 0.013           | 0.022            | 7.574       |               |                                                                 |
| BIC    | 0.050        | 0.050           | 0.041            | 20.270      |               |                                                                 |
| CV.lse | 0.019        | 0.015           | 0.012            | 2.705       | 0.012         | $sd(\mu)/\sigma = 2$<br>$\rho = 0.9$<br><i>Oracle</i> : 0.000   |
| CV.min | 0.011        | <b>0.01</b>     | <b>0.01</b>      | 2.387       | 0.011         |                                                                 |
| AICc   | 0.023        | 0.017           | <b>0.01</b>      | 2.399       |               |                                                                 |
| AIC    | <b>0.01</b>  | <b>0.01</b>     | <b>0.01</b>      | 2.365       |               |                                                                 |
| BIC    | 0.050        | 0.050           | 0.050            | 3.283       |               |                                                                 |
| CV.lse | 0.032        | 0.034           | 0.045            | 69.034      | 0.031         | $sd(\mu)/\sigma = 1$<br>$\rho = 0$<br><i>Oracle</i> : 0.010     |
| CV.min | <b>0.027</b> | 0.029           | 0.039            | 68.319      | <b>0.027</b>  |                                                                 |
| AICc   | 0.029        | 0.029           | 0.045            | 68.304      |               |                                                                 |
| AIC    | 0.123        | 0.164           | 0.346            | 73.648      |               |                                                                 |
| BIC    | 0.050        | 0.050           | 0.050            | 91.755      |               |                                                                 |
| CV.lse | 0.049        | 0.048           | 0.050            | 27.976      | 0.046         | $sd(\mu)/\sigma = 1$<br>$\rho = 0.5$<br><i>Oracle</i> : 0.010   |
| CV.min | 0.039        | 0.039           | 0.049            | 26.470      | 0.038         |                                                                 |
| AICc   | 0.041        | 0.037           | <b>0.033</b>     | 27.003      |               |                                                                 |
| AIC    | 0.064        | 0.080           | 0.159            | 26.460      |               |                                                                 |
| BIC    | 0.050        | 0.050           | 0.050            | 33.302      |               |                                                                 |
| CV.lse | 0.050        | 0.050           | 0.050            | 5.369       | 0.050         | $sd(\mu)/\sigma = 1$<br>$\rho = 0.9$<br><i>Oracle</i> : 0.010   |
| CV.min | 0.050        | 0.050           | 0.050            | 4.956       | 0.049         |                                                                 |
| AICc   | 0.050        | 0.050           | 0.050            | 4.924       |               |                                                                 |
| AIC    | <b>0.029</b> | 0.031           | 0.053            | 4.755       |               |                                                                 |
| BIC    | 0.050        | 0.050           | 0.050            | 5.466       |               |                                                                 |
| CV.lse | 0.050        | 0.050           | 0.050            | 240.830     | 0.050         | $sd(\mu)/\sigma = 0.5$<br>$\rho = 0$<br><i>Oracle</i> : 0.031   |
| CV.min | 0.046        | 0.050           | 0.050            | 250.983     | 0.046         |                                                                 |
| AICc   | <b>0.045</b> | 0.051           | 0.050            | 244.772     |               |                                                                 |
| AIC    | 0.627        | 1.030           | 2.309            | 305.325     |               |                                                                 |
| BIC    | 0.050        | 0.050           | 0.238            | 248.166     |               |                                                                 |
| CV.lse | <b>0.05</b>  | <b>0.05</b>     | <b>0.05</b>      | 83.694      | <b>0.05</b>   | $sd(\mu)/\sigma = 0.5$<br>$\rho = 0.5$<br><i>Oracle</i> : 0.021 |
| CV.min | <b>0.05</b>  | <b>0.05</b>     | <b>0.05</b>      | 86.330      | <b>0.05</b>   |                                                                 |
| AICc   | <b>0.05</b>  | <b>0.05</b>     | <b>0.05</b>      | 85.272      |               |                                                                 |
| AIC    | 0.302        | 0.452           | 1.008            | 103.480     |               |                                                                 |
| BIC    | <b>0.05</b>  | <b>0.05</b>     | <b>0.05</b>      | 83.993      |               |                                                                 |
| CV.lse | <b>0.05</b>  | <b>0.05</b>     | <b>0.05</b>      | 14.287      | <b>0.05</b>   | $sd(\mu)/\sigma = 0.5$<br>$\rho = 0.9$<br><i>Oracle</i> : 0.021 |
| CV.min | <b>0.05</b>  | <b>0.05</b>     | <b>0.05</b>      | 14.208      | <b>0.05</b>   |                                                                 |
| AICc   | <b>0.05</b>  | <b>0.05</b>     | <b>0.05</b>      | 14.248      |               |                                                                 |
| AIC    | 0.122        | 0.175           | 0.399            | 14.525      |               |                                                                 |
| BIC    | <b>0.05</b>  | <b>0.05</b>     | <b>0.05</b>      | 14.168      |               |                                                                 |

Table 43: Estimation MSE for n=1000, continuous design, dense covariates, and decay 200.

|        | lasso        | GL $\gamma = 1$ | GL $\gamma = 10$ | marginal AL | sparsenet MCP |                                                                        |
|--------|--------------|-----------------|------------------|-------------|---------------|------------------------------------------------------------------------|
| CV.lse | 0.041        | 0.045           | 0.065            | 46.053      | 0.039         | $\text{sd}(\mu)/\sigma = 2$<br>$\rho = 0$<br><i>Oracle</i> : 0.020     |
| CV.min | 0.036        | 0.039           | 0.055            | 42.622      | <b>0.035</b>  |                                                                        |
| AICc   | 0.047        | 0.044           | 0.052            | 45.755      |               |                                                                        |
| AIC    | 0.059        | 0.072           | 0.130            | 41.207      |               |                                                                        |
| BIC    | 0.100        | 0.100           | 0.074            | 114.308     |               |                                                                        |
| CV.lse | 0.060        | 0.061           | 0.095            | 23.346      | 0.056         | $\text{sd}(\mu)/\sigma = 2$<br>$\rho = 0.5$<br><i>Oracle</i> : 0.010   |
| CV.min | 0.041        | 0.042           | 0.086            | 19.498      | 0.041         |                                                                        |
| AICc   | 0.078        | 0.058           | 0.042            | 22.139      |               |                                                                        |
| AIC    | <b>0.038</b> | 0.042           | 0.066            | 16.298      |               |                                                                        |
| BIC    | 0.100        | 0.100           | 0.098            | 41.460      |               |                                                                        |
| CV.lse | 0.086        | 0.086           | 0.100            | 6.322       | 0.093         | $\text{sd}(\mu)/\sigma = 2$<br>$\rho = 0.9$<br><i>Oracle</i> : 0.010   |
| CV.min | 0.064        | 0.066           | 0.099            | 5.325       | 0.078         |                                                                        |
| AICc   | 0.100        | 0.094           | 0.042            | 5.277       |               |                                                                        |
| AIC    | 0.037        | <b>0.033</b>    | 0.037            | 4.532       |               |                                                                        |
| BIC    | 0.100        | 0.100           | 0.100            | 6.597       |               |                                                                        |
| CV.lse | 0.083        | 0.095           | 0.100            | 148.986     | 0.082         | $\text{sd}(\mu)/\sigma = 1$<br>$\rho = 0$<br><i>Oracle</i> : 0.044     |
| CV.min | <b>0.07</b>  | 0.086           | 0.100            | 145.735     | <b>0.07</b>   |                                                                        |
| AICc   | 0.076        | 0.080           | 0.124            | 147.233     |               |                                                                        |
| AIC    | 0.272        | 0.396           | 0.843            | 154.980     |               |                                                                        |
| BIC    | 0.100        | 0.100           | 0.150            | 197.277     |               |                                                                        |
| CV.lse | 0.100        | 0.100           | 0.100            | 59.814      | 0.100         | $\text{sd}(\mu)/\sigma = 1$<br>$\rho = 0.5$<br><i>Oracle</i> : 0.030   |
| CV.min | 0.097        | 0.099           | 0.100            | 55.908      | 0.097         |                                                                        |
| AICc   | <b>0.096</b> | 0.098           | 0.097            | 57.338      |               |                                                                        |
| AIC    | 0.145        | 0.193           | 0.387            | 54.755      |               |                                                                        |
| BIC    | 0.100        | 0.100           | 0.100            | 66.869      |               |                                                                        |
| CV.lse | 0.100        | 0.100           | 0.100            | 10.892      | 0.100         | $\text{sd}(\mu)/\sigma = 1$<br>$\rho = 0.9$<br><i>Oracle</i> : 0.029   |
| CV.min | 0.100        | 0.100           | 0.100            | 10.352      | 0.100         |                                                                        |
| AICc   | 0.100        | 0.100           | 0.100            | 10.271      |               |                                                                        |
| AIC    | <b>0.075</b> | 0.089           | 0.161            | 9.447       |               |                                                                        |
| BIC    | 0.100        | 0.100           | 0.100            | 10.781      |               |                                                                        |
| CV.lse | 0.100        | 0.100           | 0.100            | 490.719     | 0.100         | $\text{sd}(\mu)/\sigma = 0.5$<br>$\rho = 0$<br><i>Oracle</i> : 0.090   |
| CV.min | <b>0.098</b> | 0.101           | 0.101            | 511.451     | <b>0.098</b>  |                                                                        |
| AICc   | <b>0.098</b> | 0.106           | 0.100            | 498.621     |               |                                                                        |
| AIC    | 1.303        | 2.403           | 5.214            | 623.452     |               |                                                                        |
| BIC    | 0.100        | 0.100           | 3.583            | 499.327     |               |                                                                        |
| CV.lse | <b>0.1</b>   | <b>0.1</b>      | <b>0.1</b>       | 167.371     | <b>0.1</b>    | $\text{sd}(\mu)/\sigma = 0.5$<br>$\rho = 0.5$<br><i>Oracle</i> : 0.069 |
| CV.min | <b>0.1</b>   | <b>0.1</b>      | <b>0.1</b>       | 172.579     | <b>0.1</b>    |                                                                        |
| AICc   | <b>0.1</b>   | <b>0.1</b>      | <b>0.1</b>       | 170.568     |               |                                                                        |
| AIC    | 0.613        | 1.017           | 2.251            | 208.452     |               |                                                                        |
| BIC    | <b>0.1</b>   | <b>0.1</b>      | 0.143            | 167.685     |               |                                                                        |
| CV.lse | <b>0.1</b>   | <b>0.1</b>      | <b>0.1</b>       | 27.529      | <b>0.1</b>    | $\text{sd}(\mu)/\sigma = 0.5$<br>$\rho = 0.9$<br><i>Oracle</i> : 0.068 |
| CV.min | <b>0.1</b>   | <b>0.1</b>      | <b>0.1</b>       | 27.546      | <b>0.1</b>    |                                                                        |
| AICc   | <b>0.1</b>   | <b>0.1</b>      | <b>0.1</b>       | 27.607      |               |                                                                        |
| AIC    | 0.278        | 0.439           | 0.979            | 28.306      |               |                                                                        |
| BIC    | <b>0.1</b>   | <b>0.1</b>      | <b>0.1</b>       | 27.474      |               |                                                                        |

Table 44: Estimation MSE for n=1000, binary design, sparse covariates, and decay 10.

|        | lasso    | GL $\gamma = 1$ | GL $\gamma = 10$ | marginal AL | sparsenet MCP |                                                                      |
|--------|----------|-----------------|------------------|-------------|---------------|----------------------------------------------------------------------|
| CV.lse | <b>0</b> | <b>0</b>        | <b>0</b>         | 0.328       | <b>0</b>      | sd( $\mu$ )/ $\sigma = 2$<br>$\rho = 0$<br><i>Oracle</i> : 0.000     |
| CV.min | <b>0</b> | <b>0</b>        | <b>0</b>         | 0.317       | <b>0</b>      |                                                                      |
| AICc   | <b>0</b> | <b>0</b>        | <b>0</b>         | 0.317       |               |                                                                      |
| AIC    | <b>0</b> | <b>0</b>        | <b>0</b>         | 0.317       |               |                                                                      |
| BIC    | <b>0</b> | <b>0</b>        | <b>0</b>         | 0.328       |               |                                                                      |
| CV.lse | <b>0</b> | <b>0</b>        | <b>0</b>         | 0.295       | <b>0</b>      | sd( $\mu$ )/ $\sigma = 2$<br>$\rho = 0.5$<br><i>Oracle</i> : 0.000   |
| CV.min | <b>0</b> | <b>0</b>        | <b>0</b>         | 0.285       | <b>0</b>      |                                                                      |
| AICc   | <b>0</b> | <b>0</b>        | <b>0</b>         | 0.286       |               |                                                                      |
| AIC    | <b>0</b> | <b>0</b>        | <b>0</b>         | 0.285       |               |                                                                      |
| BIC    | <b>0</b> | <b>0</b>        | <b>0</b>         | 0.297       |               |                                                                      |
| CV.lse | <b>0</b> | <b>0</b>        | <b>0</b>         | 0.281       | <b>0</b>      | sd( $\mu$ )/ $\sigma = 2$<br>$\rho = 0.9$<br><i>Oracle</i> : 0.000   |
| CV.min | <b>0</b> | <b>0</b>        | <b>0</b>         | 0.272       | <b>0</b>      |                                                                      |
| AICc   | <b>0</b> | <b>0</b>        | <b>0</b>         | 0.272       |               |                                                                      |
| AIC    | <b>0</b> | <b>0</b>        | <b>0</b>         | 0.272       |               |                                                                      |
| BIC    | <b>0</b> | <b>0</b>        | <b>0</b>         | 0.283       |               |                                                                      |
| CV.lse | <b>0</b> | <b>0</b>        | <b>0</b>         | 1.246       | <b>0</b>      | sd( $\mu$ )/ $\sigma = 1$<br>$\rho = 0$<br><i>Oracle</i> : 0.000     |
| CV.min | <b>0</b> | <b>0</b>        | <b>0</b>         | 1.276       | <b>0</b>      |                                                                      |
| AICc   | <b>0</b> | <b>0</b>        | <b>0</b>         | 1.266       |               |                                                                      |
| AIC    | 0.010    | 0.010           | 0.013            | 1.313       |               |                                                                      |
| BIC    | <b>0</b> | <b>0</b>        | <b>0</b>         | 1.267       |               |                                                                      |
| CV.lse | <b>0</b> | <b>0</b>        | <b>0</b>         | 1.118       | <b>0</b>      | sd( $\mu$ )/ $\sigma = 1$<br>$\rho = 0.5$<br><i>Oracle</i> : 0.000   |
| CV.min | <b>0</b> | <b>0</b>        | <b>0</b>         | 1.146       | <b>0</b>      |                                                                      |
| AICc   | <b>0</b> | <b>0</b>        | <b>0</b>         | 1.135       |               |                                                                      |
| AIC    | 0.009    | 0.010           | 0.011            | 1.181       |               |                                                                      |
| BIC    | <b>0</b> | <b>0</b>        | <b>0</b>         | 1.142       |               |                                                                      |
| CV.lse | <b>0</b> | <b>0</b>        | <b>0</b>         | 1.063       | <b>0</b>      | sd( $\mu$ )/ $\sigma = 1$<br>$\rho = 0.9$<br><i>Oracle</i> : 0.000   |
| CV.min | <b>0</b> | <b>0</b>        | <b>0</b>         | 1.084       | <b>0</b>      |                                                                      |
| AICc   | <b>0</b> | <b>0</b>        | <b>0</b>         | 1.078       |               |                                                                      |
| AIC    | 0.008    | 0.009           | 0.010            | 1.114       |               |                                                                      |
| BIC    | <b>0</b> | <b>0</b>        | <b>0</b>         | 1.086       |               |                                                                      |
| CV.lse | <b>0</b> | <b>0</b>        | <b>0</b>         | 4.898       | <b>0</b>      | sd( $\mu$ )/ $\sigma = 0.5$<br>$\rho = 0$<br><i>Oracle</i> : 0.000   |
| CV.min | <b>0</b> | <b>0</b>        | <b>0</b>         | 5.206       | <b>0</b>      |                                                                      |
| AICc   | <b>0</b> | <b>0</b>        | 0.002            | 5.082       |               |                                                                      |
| AIC    | 0.049    | 0.060           | 0.124            | 6.067       |               |                                                                      |
| BIC    | <b>0</b> | <b>0</b>        | <b>0</b>         | 4.957       |               |                                                                      |
| CV.lse | <b>0</b> | <b>0</b>        | <b>0</b>         | 4.397       | <b>0</b>      | sd( $\mu$ )/ $\sigma = 0.5$<br>$\rho = 0.5$<br><i>Oracle</i> : 0.000 |
| CV.min | <b>0</b> | <b>0</b>        | <b>0</b>         | 4.670       | <b>0</b>      |                                                                      |
| AICc   | <b>0</b> | <b>0</b>        | 0.002            | 4.553       |               |                                                                      |
| AIC    | 0.044    | 0.053           | 0.106            | 5.446       |               |                                                                      |
| BIC    | <b>0</b> | <b>0</b>        | <b>0</b>         | 4.461       |               |                                                                      |
| CV.lse | <b>0</b> | <b>0</b>        | <b>0</b>         | 4.172       | <b>0</b>      | sd( $\mu$ )/ $\sigma = 0.5$<br>$\rho = 0.9$<br><i>Oracle</i> : 0.000 |
| CV.min | <b>0</b> | <b>0</b>        | <b>0</b>         | 4.403       | <b>0</b>      |                                                                      |
| AICc   | <b>0</b> | <b>0</b>        | 0.002            | 4.312       |               |                                                                      |
| AIC    | 0.038    | 0.046           | 0.093            | 5.080       |               |                                                                      |
| BIC    | <b>0</b> | <b>0</b>        | <b>0</b>         | 4.236       |               |                                                                      |

Table 45: Estimation MSE for n=1000, binary design, sparse covariates, and decay 50.

|        | lasso       | GL $\gamma = 1$ | GL $\gamma = 10$ | marginal AL | sparsenet MCP |                                                                        |
|--------|-------------|-----------------|------------------|-------------|---------------|------------------------------------------------------------------------|
| CV.lse | <b>0</b>    | <b>0</b>        | <b>0</b>         | 2.042       | <b>0</b>      | $\text{sd}(\mu)/\sigma = 2$<br>$\rho = 0$<br><i>Oracle</i> : 0.000     |
| CV.min | <b>0</b>    | <b>0</b>        | <b>0</b>         | 1.974       | <b>0</b>      |                                                                        |
| AICc   | <b>0</b>    | <b>0</b>        | <b>0</b>         | 1.981       |               |                                                                        |
| AIC    | 0.011       | 0.011           | 0.020            | 1.981       |               |                                                                        |
| BIC    | 0.007       | 0.002           | 0.001            | 2.289       |               |                                                                        |
| CV.lse | <b>0</b>    | <b>0</b>        | <b>0</b>         | 1.853       | <b>0</b>      | $\text{sd}(\mu)/\sigma = 2$<br>$\rho = 0.5$<br><i>Oracle</i> : 0.000   |
| CV.min | <b>0</b>    | <b>0</b>        | <b>0</b>         | 1.786       | <b>0</b>      |                                                                        |
| AICc   | <b>0</b>    | <b>0</b>        | <b>0</b>         | 1.795       |               |                                                                        |
| AIC    | 0.010       | 0.011           | 0.017            | 1.790       |               |                                                                        |
| BIC    | 0.008       | 0.003           | <b>0</b>         | 2.120       |               |                                                                        |
| CV.lse | <b>0</b>    | <b>0</b>        | <b>0</b>         | 1.762       | <b>0</b>      | $\text{sd}(\mu)/\sigma = 2$<br>$\rho = 0.9$<br><i>Oracle</i> : 0.000   |
| CV.min | <b>0</b>    | <b>0</b>        | <b>0</b>         | 1.693       | <b>0</b>      |                                                                        |
| AICc   | <b>0</b>    | <b>0</b>        | <b>0</b>         | 1.704       |               |                                                                        |
| AIC    | 0.010       | 0.010           | 0.015            | 1.694       |               |                                                                        |
| BIC    | 0.008       | 0.003           | <b>0</b>         | 2.016       |               |                                                                        |
| CV.lse | <b>0.01</b> | <b>0.01</b>     | 0.012            | 7.615       | <b>0.01</b>   | $\text{sd}(\mu)/\sigma = 1$<br>$\rho = 0$<br><i>Oracle</i> : 0.001     |
| CV.min | <b>0.01</b> | <b>0.01</b>     | 0.011            | 7.637       | <b>0.01</b>   |                                                                        |
| AICc   | <b>0.01</b> | <b>0.01</b>     | 0.017            | 7.579       |               |                                                                        |
| AIC    | 0.064       | 0.079           | 0.163            | 8.292       |               |                                                                        |
| BIC    | 0.017       | 0.014           | 0.017            | 8.587       |               |                                                                        |
| CV.lse | <b>0.01</b> | <b>0.01</b>     | 0.011            | 6.857       | <b>0.01</b>   | $\text{sd}(\mu)/\sigma = 1$<br>$\rho = 0.5$<br><i>Oracle</i> : 0.000   |
| CV.min | <b>0.01</b> | <b>0.01</b>     | <b>0.01</b>      | 6.868       | <b>0.01</b>   |                                                                        |
| AICc   | <b>0.01</b> | <b>0.01</b>     | 0.014            | 6.823       |               |                                                                        |
| AIC    | 0.056       | 0.069           | 0.139            | 7.467       |               |                                                                        |
| BIC    | 0.018       | 0.015           | 0.017            | 7.855       |               |                                                                        |
| CV.lse | <b>0.01</b> | <b>0.01</b>     | 0.011            | 6.509       | <b>0.01</b>   | $\text{sd}(\mu)/\sigma = 1$<br>$\rho = 0.9$<br><i>Oracle</i> : 0.000   |
| CV.min | <b>0.01</b> | <b>0.01</b>     | <b>0.01</b>      | 6.486       | <b>0.01</b>   |                                                                        |
| AICc   | <b>0.01</b> | <b>0.01</b>     | 0.013            | 6.456       |               |                                                                        |
| AIC    | 0.050       | 0.061           | 0.123            | 6.992       |               |                                                                        |
| BIC    | 0.019       | 0.016           | 0.017            | 7.492       |               |                                                                        |
| CV.lse | <b>0.02</b> | <b>0.02</b>     | <b>0.02</b>      | 28.325      | <b>0.02</b>   | $\text{sd}(\mu)/\sigma = 0.5$<br>$\rho = 0$<br><i>Oracle</i> : 0.012   |
| CV.min | <b>0.02</b> | <b>0.02</b>     | 0.022            | 29.614      | <b>0.02</b>   |                                                                        |
| AICc   | <b>0.02</b> | 0.022           | 0.041            | 28.920      |               |                                                                        |
| AIC    | 0.359       | 0.530           | 1.206            | 35.888      |               |                                                                        |
| BIC    | <b>0.02</b> | <b>0.02</b>     | <b>0.02</b>      | 29.717      |               |                                                                        |
| CV.lse | <b>0.02</b> | <b>0.02</b>     | <b>0.02</b>      | 25.373      | <b>0.02</b>   | $\text{sd}(\mu)/\sigma = 0.5$<br>$\rho = 0.5$<br><i>Oracle</i> : 0.011 |
| CV.min | <b>0.02</b> | <b>0.02</b>     | 0.021            | 26.519      | <b>0.02</b>   |                                                                        |
| AICc   | <b>0.02</b> | 0.021           | 0.043            | 25.885      |               |                                                                        |
| AIC    | 0.313       | 0.454           | 1.013            | 32.212      |               |                                                                        |
| BIC    | <b>0.02</b> | <b>0.02</b>     | <b>0.02</b>      | 26.501      |               |                                                                        |
| CV.lse | <b>0.02</b> | <b>0.02</b>     | <b>0.02</b>      | 24.000      | <b>0.02</b>   | $\text{sd}(\mu)/\sigma = 0.5$<br>$\rho = 0.9$<br><i>Oracle</i> : 0.010 |
| CV.min | <b>0.02</b> | <b>0.02</b>     | 0.021            | 24.954      | <b>0.02</b>   |                                                                        |
| AICc   | <b>0.02</b> | 0.021           | 0.037            | 24.431      |               |                                                                        |
| AIC    | 0.276       | 0.399           | 0.889            | 30.063      |               |                                                                        |
| BIC    | <b>0.02</b> | <b>0.02</b>     | <b>0.02</b>      | 24.987      |               |                                                                        |

Table 46: Estimation MSE for n=1000, binary design, sparse covariates, and decay 100.

|        | lasso        | GL $\gamma = 1$ | GL $\gamma = 10$ | marginal AL | sparsenet MCP |                                                                 |
|--------|--------------|-----------------|------------------|-------------|---------------|-----------------------------------------------------------------|
| CV.lse | 0.010        | 0.007           | 0.002            | 3.649       | 0.002         | $sd(\mu)/\sigma = 2$<br>$\rho = 0$<br><i>Oracle</i> : 0.000     |
| CV.min | 0.008        | 0.004           | <b>0.001</b>     | 3.533       | <b>0.001</b>  |                                                                 |
| AICc   | 0.009        | 0.004           | 0.002            | 3.552       |               |                                                                 |
| AIC    | 0.022        | 0.024           | 0.044            | 3.574       |               |                                                                 |
| BIC    | 0.010        | 0.010           | 0.006            | 4.076       |               |                                                                 |
| CV.lse | 0.010        | 0.007           | 0.001            | 3.315       | 0.001         | $sd(\mu)/\sigma = 2$<br>$\rho = 0.5$<br><i>Oracle</i> : 0.000   |
| CV.min | 0.008        | 0.003           | <b>0</b>         | 3.202       | <b>0</b>      |                                                                 |
| AICc   | 0.010        | 0.003           | 0.002            | 3.227       |               |                                                                 |
| AIC    | 0.019        | 0.022           | 0.038            | 3.229       |               |                                                                 |
| BIC    | 0.011        | 0.010           | 0.004            | 3.784       |               |                                                                 |
| CV.lse | 0.010        | 0.006           | 0.001            | 3.162       | <b>0</b>      | $sd(\mu)/\sigma = 2$<br>$\rho = 0.9$<br><i>Oracle</i> : 0.000   |
| CV.min | 0.008        | 0.002           | <b>0</b>         | 3.044       | <b>0</b>      |                                                                 |
| AICc   | 0.009        | 0.003           | 0.001            | 3.070       |               |                                                                 |
| AIC    | 0.017        | 0.020           | 0.034            | 3.060       |               |                                                                 |
| BIC    | 0.011        | 0.010           | 0.004            | 3.628       |               |                                                                 |
| CV.lse | 0.023        | 0.024           | 0.033            | 14.138      | 0.022         | $sd(\mu)/\sigma = 1$<br>$\rho = 0$<br><i>Oracle</i> : 0.007     |
| CV.min | <b>0.021</b> | <b>0.021</b>    | 0.028            | 14.068      | <b>0.021</b>  |                                                                 |
| AICc   | <b>0.021</b> | <b>0.021</b>    | 0.038            | 14.009      |               |                                                                 |
| AIC    | 0.126        | 0.166           | 0.354            | 15.342      |               |                                                                 |
| BIC    | 0.040        | 0.038           | 0.040            | 17.915      |               |                                                                 |
| CV.lse | 0.024        | 0.024           | 0.032            | 12.775      | 0.022         | $sd(\mu)/\sigma = 1$<br>$\rho = 0.5$<br><i>Oracle</i> : 0.004   |
| CV.min | <b>0.02</b>  | <b>0.02</b>     | 0.026            | 12.685      | <b>0.02</b>   |                                                                 |
| AICc   | 0.021        | <b>0.02</b>     | 0.033            | 12.655      |               |                                                                 |
| AIC    | 0.111        | 0.145           | 0.302            | 13.777      |               |                                                                 |
| BIC    | 0.040        | 0.039           | 0.040            | 16.729      |               |                                                                 |
| CV.lse | 0.024        | 0.024           | 0.031            | 12.135      | 0.022         | $sd(\mu)/\sigma = 1$<br>$\rho = 0.9$<br><i>Oracle</i> : 0.003   |
| CV.min | <b>0.02</b>  | <b>0.02</b>     | 0.025            | 11.995      | <b>0.02</b>   |                                                                 |
| AICc   | <b>0.02</b>  | <b>0.02</b>     | 0.031            | 11.980      |               |                                                                 |
| AIC    | 0.098        | 0.128           | 0.267            | 12.956      |               |                                                                 |
| BIC    | 0.040        | 0.039           | 0.040            | 16.045      |               |                                                                 |
| CV.lse | 0.040        | 0.040           | 0.040            | 51.327      | 0.040         | $sd(\mu)/\sigma = 0.5$<br>$\rho = 0$<br><i>Oracle</i> : 0.024   |
| CV.min | 0.040        | 0.041           | 0.042            | 53.535      | 0.040         |                                                                 |
| AICc   | <b>0.039</b> | 0.051           | 0.071            | 52.266      |               |                                                                 |
| AIC    | 0.669        | 1.078           | 2.446            | 65.105      |               |                                                                 |
| BIC    | 0.040        | 0.040           | 0.040            | 53.281      |               |                                                                 |
| CV.lse | <b>0.04</b>  | <b>0.04</b>     | <b>0.04</b>      | 45.907      | <b>0.04</b>   | $sd(\mu)/\sigma = 0.5$<br>$\rho = 0.5$<br><i>Oracle</i> : 0.021 |
| CV.min | <b>0.04</b>  | 0.041           | 0.041            | 47.883      | <b>0.04</b>   |                                                                 |
| AICc   | <b>0.04</b>  | 0.047           | 0.073            | 46.753      |               |                                                                 |
| AIC    | 0.584        | 0.918           | 2.046            | 58.347      |               |                                                                 |
| BIC    | <b>0.04</b>  | <b>0.04</b>     | <b>0.04</b>      | 47.401      |               |                                                                 |
| CV.lse | <b>0.04</b>  | <b>0.04</b>     | <b>0.04</b>      | 43.426      | <b>0.04</b>   | $sd(\mu)/\sigma = 0.5$<br>$\rho = 0.9$<br><i>Oracle</i> : 0.019 |
| CV.min | <b>0.04</b>  | <b>0.04</b>     | 0.041            | 45.137      | <b>0.04</b>   |                                                                 |
| AICc   | <b>0.04</b>  | 0.046           | 0.064            | 44.127      |               |                                                                 |
| AIC    | 0.511        | 0.804           | 1.800            | 54.507      |               |                                                                 |
| BIC    | <b>0.04</b>  | <b>0.04</b>     | <b>0.04</b>      | 44.686      |               |                                                                 |

Table 47: Estimation MSE for n=1000, binary design, sparse covariates, and decay 200.

|        | lasso        | GL $\gamma = 1$ | GL $\gamma = 10$ | marginal AL | sparsenet MCP |                                                                      |
|--------|--------------|-----------------|------------------|-------------|---------------|----------------------------------------------------------------------|
| CV.lse | 0.010        | 0.010           | 0.002            | 5.285       | <b>0.001</b>  | sd( $\mu$ )/ $\sigma = 2$<br>$\rho = 0$<br><i>Oracle</i> : 0.000     |
| CV.min | 0.010        | 0.009           | 0.002            | 5.132       | <b>0.001</b>  |                                                                      |
| AICc   | 0.010        | 0.009           | 0.004            | 5.157       |               |                                                                      |
| AIC    | 0.033        | 0.038           | 0.073            | 5.239       |               |                                                                      |
| BIC    | 0.014        | 0.010           | 0.007            | 5.743       |               |                                                                      |
| CV.lse | 0.010        | 0.010           | 0.001            | 4.808       | 0.001         | sd( $\mu$ )/ $\sigma = 2$<br>$\rho = 0.5$<br><i>Oracle</i> : 0.000   |
| CV.min | 0.010        | 0.009           | 0.001            | 4.658       | <b>0</b>      |                                                                      |
| AICc   | 0.010        | 0.010           | 0.002            | 4.688       |               |                                                                      |
| AIC    | 0.029        | 0.033           | 0.062            | 4.733       |               |                                                                      |
| BIC    | 0.015        | 0.010           | 0.005            | 5.306       |               |                                                                      |
| CV.lse | 0.010        | 0.010           | 0.001            | 4.588       | <b>0</b>      | sd( $\mu$ )/ $\sigma = 2$<br>$\rho = 0.9$<br><i>Oracle</i> : 0.000   |
| CV.min | 0.010        | 0.009           | 0.001            | 4.433       | <b>0</b>      |                                                                      |
| AICc   | 0.010        | 0.009           | 0.002            | 4.466       |               |                                                                      |
| AIC    | 0.026        | 0.030           | 0.055            | 4.489       |               |                                                                      |
| BIC    | 0.015        | 0.010           | 0.005            | 5.083       |               |                                                                      |
| CV.lse | 0.038        | 0.041           | 0.056            | 21.085      | 0.036         | sd( $\mu$ )/ $\sigma = 1$<br>$\rho = 0$<br><i>Oracle</i> : 0.010     |
| CV.min | <b>0.031</b> | 0.033           | 0.050            | 20.917      | <b>0.031</b>  |                                                                      |
| AICc   | 0.032        | 0.033           | 0.063            | 20.861      |               |                                                                      |
| AIC    | 0.193        | 0.267           | 0.579            | 22.850      |               |                                                                      |
| BIC    | 0.060        | 0.059           | 0.060            | 28.864      |               |                                                                      |
| CV.lse | 0.039        | 0.040           | 0.055            | 19.070      | 0.037         | sd( $\mu$ )/ $\sigma = 1$<br>$\rho = 0.5$<br><i>Oracle</i> : 0.010   |
| CV.min | <b>0.031</b> | 0.032           | 0.047            | 18.874      | <b>0.031</b>  |                                                                      |
| AICc   | 0.033        | 0.032           | 0.055            | 18.858      |               |                                                                      |
| AIC    | 0.170        | 0.232           | 0.491            | 20.495      |               |                                                                      |
| BIC    | 0.060        | 0.060           | 0.060            | 26.477      |               |                                                                      |
| CV.lse | 0.038        | 0.040           | 0.054            | 18.124      | 0.036         | sd( $\mu$ )/ $\sigma = 1$<br>$\rho = 0.9$<br><i>Oracle</i> : 0.010   |
| CV.min | <b>0.031</b> | <b>0.031</b>    | 0.046            | 17.859      | <b>0.031</b>  |                                                                      |
| AICc   | 0.033        | <b>0.031</b>    | 0.050            | 17.873      |               |                                                                      |
| AIC    | 0.150        | 0.203           | 0.432            | 19.273      |               |                                                                      |
| BIC    | 0.060        | 0.060           | 0.060            | 25.202      |               |                                                                      |
| CV.lse | 0.060        | 0.060           | 0.060            | 75.904      | 0.060         | sd( $\mu$ )/ $\sigma = 0.5$<br>$\rho = 0$<br><i>Oracle</i> : 0.035   |
| CV.min | <b>0.059</b> | 0.062           | 0.062            | 79.163      | <b>0.059</b>  |                                                                      |
| AICc   | <b>0.059</b> | 0.086           | 0.090            | 77.225      |               |                                                                      |
| AIC    | 0.997        | 1.708           | 3.825            | 96.438      |               |                                                                      |
| BIC    | 0.060        | 0.060           | 0.060            | 78.420      |               |                                                                      |
| CV.lse | <b>0.06</b>  | <b>0.06</b>     | <b>0.06</b>      | 67.803      | <b>0.06</b>   | sd( $\mu$ )/ $\sigma = 0.5$<br>$\rho = 0.5$<br><i>Oracle</i> : 0.030 |
| CV.min | <b>0.06</b>  | 0.061           | 0.062            | 70.692      | <b>0.06</b>   |                                                                      |
| AICc   | <b>0.06</b>  | 0.079           | 0.092            | 68.967      |               |                                                                      |
| AIC    | 0.871        | 1.455           | 3.226            | 86.201      |               |                                                                      |
| BIC    | <b>0.06</b>  | <b>0.06</b>     | <b>0.06</b>      | 69.642      |               |                                                                      |
| CV.lse | 0.060        | 0.060           | 0.060            | 64.208      | 0.060         | sd( $\mu$ )/ $\sigma = 0.5$<br>$\rho = 0.9$<br><i>Oracle</i> : 0.027 |
| CV.min | 0.060        | 0.061           | 0.061            | 66.746      | 0.060         |                                                                      |
| AICc   | <b>0.059</b> | 0.076           | 0.087            | 65.228      |               |                                                                      |
| AIC    | 0.761        | 1.270           | 2.828            | 80.641      |               |                                                                      |
| BIC    | 0.060        | 0.060           | 0.060            | 65.755      |               |                                                                      |

Table 48: Estimation MSE for n=1000, continuous design, sparse covariates, and decay 10.

|        | lasso | GL $\gamma = 1$ | GL $\gamma = 10$ | marginal AL | sparsenet MCP |                                                                      |
|--------|-------|-----------------|------------------|-------------|---------------|----------------------------------------------------------------------|
| CV.lse | 0     | 0               | 0                | 1.314       | 0             | sd( $\mu$ )/ $\sigma = 2$<br>$\rho = 0$<br><i>Oracle</i> : 0.000     |
| CV.min | 0     | 0               | 0                | 1.272       | 0             |                                                                      |
| AICc   | 0     | 0               | 0                | 1.273       |               |                                                                      |
| AIC    | 0     | 0               | 0                | 1.272       |               |                                                                      |
| BIC    | 0     | 0               | 0                | 1.318       |               |                                                                      |
| CV.lse | 0     | 0               | 0                | 0.610       | 0             | sd( $\mu$ )/ $\sigma = 2$<br>$\rho = 0.5$<br><i>Oracle</i> : 0.000   |
| CV.min | 0     | 0               | 0                | 0.586       | 0             |                                                                      |
| AICc   | 0     | 0               | 0                | 0.587       |               |                                                                      |
| AIC    | 0     | 0               | 0                | 0.586       |               |                                                                      |
| BIC    | 0     | 0               | 0                | 0.606       |               |                                                                      |
| CV.lse | 0     | 0               | 0                | 0.174       | 0             | sd( $\mu$ )/ $\sigma = 2$<br>$\rho = 0.9$<br><i>Oracle</i> : 0.000   |
| CV.min | 0     | 0               | 0                | 0.167       | 0             |                                                                      |
| AICc   | 0     | 0               | 0                | 0.167       |               |                                                                      |
| AIC    | 0     | 0               | 0                | 0.167       |               |                                                                      |
| BIC    | 0     | 0               | 0                | 0.167       |               |                                                                      |
| CV.lse | 0     | 0               | 0                | 5.004       | 0             | sd( $\mu$ )/ $\sigma = 1$<br>$\rho = 0$<br><i>Oracle</i> : 0.000     |
| CV.min | 0     | 0               | 0                | 5.133       | 0             |                                                                      |
| AICc   | 0     | 0               | 0                | 5.083       |               |                                                                      |
| AIC    | 0.010 | 0.010           | 0.010            | 5.277       |               |                                                                      |
| BIC    | 0     | 0               | 0                | 5.094       |               |                                                                      |
| CV.lse | 0     | 0               | 0                | 2.083       | 0             | sd( $\mu$ )/ $\sigma = 1$<br>$\rho = 0.5$<br><i>Oracle</i> : 0.000   |
| CV.min | 0     | 0               | 0                | 2.069       | 0             |                                                                      |
| AICc   | 0     | 0               | 0                | 2.064       |               |                                                                      |
| AIC    | 0     | 0               | 0.001            | 2.074       |               |                                                                      |
| BIC    | 0     | 0               | 0                | 2.230       |               |                                                                      |
| CV.lse | 0     | 0               | 0                | 0.544       | 0             | sd( $\mu$ )/ $\sigma = 1$<br>$\rho = 0.9$<br><i>Oracle</i> : 0.000   |
| CV.min | 0     | 0               | 0                | 0.523       | 0             |                                                                      |
| AICc   | 0     | 0               | 0                | 0.523       |               |                                                                      |
| AIC    | 0     | 0               | 0                | 0.523       |               |                                                                      |
| BIC    | 0     | 0               | 0                | 0.537       |               |                                                                      |
| CV.lse | 0     | 0               | 0                | 19.703      | 0             | sd( $\mu$ )/ $\sigma = 0.5$<br>$\rho = 0$<br><i>Oracle</i> : 0.000   |
| CV.min | 0     | 0               | 0                | 20.924      | 0             |                                                                      |
| AICc   | 0     | 0               | 0                | 20.419      |               |                                                                      |
| AIC    | 0.040 | 0.048           | 0.099            | 24.311      |               |                                                                      |
| BIC    | 0     | 0               | 0                | 19.918      |               |                                                                      |
| CV.lse | 0     | 0               | 0                | 7.936       | 0             | sd( $\mu$ )/ $\sigma = 0.5$<br>$\rho = 0.5$<br><i>Oracle</i> : 0.000 |
| CV.min | 0     | 0               | 0                | 8.190       | 0             |                                                                      |
| AICc   | 0     | 0               | 0                | 8.099       |               |                                                                      |
| AIC    | 0.019 | 0.021           | 0.042            | 8.896       |               |                                                                      |
| BIC    | 0     | 0               | 0                | 8.117       |               |                                                                      |
| CV.lse | 0     | 0               | 0                | 2.049       | 0             | sd( $\mu$ )/ $\sigma = 0.5$<br>$\rho = 0.9$<br><i>Oracle</i> : 0.000 |
| CV.min | 0     | 0               | 0                | 2.022       | 0             |                                                                      |
| AICc   | 0     | 0               | 0                | 2.025       |               |                                                                      |
| AIC    | 0.009 | 0.010           | 0.019            | 2.033       |               |                                                                      |
| BIC    | 0     | 0               | 0                | 2.065       |               |                                                                      |



Table 49: Estimation MSE for n=1000, continuous design, sparse covariates, and decay 50.

|        | lasso       | GL $\gamma = 1$ | GL $\gamma = 10$ | marginal AL | sparsenet MCP |                                                                      |
|--------|-------------|-----------------|------------------|-------------|---------------|----------------------------------------------------------------------|
| CV.lse | <b>0</b>    | <b>0</b>        | <b>0</b>         | 8.189       | <b>0</b>      | sd( $\mu$ )/ $\sigma = 2$<br>$\rho = 0$<br><i>Oracle</i> : 0.000     |
| CV.min | <b>0</b>    | <b>0</b>        | <b>0</b>         | 7.919       | <b>0</b>      |                                                                      |
| AICc   | <b>0</b>    | <b>0</b>        | <b>0</b>         | 7.948       |               |                                                                      |
| AIC    | 0.010       | 0.010           | 0.016            | 7.945       |               |                                                                      |
| BIC    | 0.006       | 0.002           | 0.002            | 9.162       |               |                                                                      |
| CV.lse | 0.002       | <b>0</b>        | <b>0</b>         | 3.630       | <b>0</b>      | sd( $\mu$ )/ $\sigma = 2$<br>$\rho = 0.5$<br><i>Oracle</i> : 0.000   |
| CV.min | <b>0</b>    | <b>0</b>        | <b>0</b>         | 3.381       | <b>0</b>      |                                                                      |
| AICc   | 0.002       | <b>0</b>        | <b>0</b>         | 3.442       |               |                                                                      |
| AIC    | 0.001       | 0.001           | 0.009            | 3.355       |               |                                                                      |
| BIC    | 0.015       | 0.010           | 0.003            | 5.182       |               |                                                                      |
| CV.lse | 0.006       | 0.002           | <b>0</b>         | 1.143       | <b>0</b>      | sd( $\mu$ )/ $\sigma = 2$<br>$\rho = 0.9$<br><i>Oracle</i> : 0.000   |
| CV.min | <b>0</b>    | <b>0</b>        | <b>0</b>         | 1.075       | <b>0</b>      |                                                                      |
| AICc   | 0.007       | 0.002           | <b>0</b>         | 1.076       |               |                                                                      |
| AIC    | <b>0</b>    | <b>0</b>        | <b>0</b>         | 1.076       |               |                                                                      |
| BIC    | 0.020       | 0.020           | 0.019            | 1.215       |               |                                                                      |
| CV.lse | <b>0.01</b> | <b>0.01</b>     | 0.011            | 30.539      | <b>0.01</b>   | sd( $\mu$ )/ $\sigma = 1$<br>$\rho = 0$<br><i>Oracle</i> : 0.000     |
| CV.min | <b>0.01</b> | <b>0.01</b>     | <b>0.01</b>      | 30.640      | <b>0.01</b>   |                                                                      |
| AICc   | <b>0.01</b> | <b>0.01</b>     | 0.011            | 30.396      |               |                                                                      |
| AIC    | 0.051       | 0.063           | 0.129            | 33.232      |               |                                                                      |
| BIC    | 0.017       | 0.016           | 0.020            | 34.514      |               |                                                                      |
| CV.lse | 0.016       | 0.013           | 0.013            | 12.367      | <b>0.01</b>   | sd( $\mu$ )/ $\sigma = 1$<br>$\rho = 0.5$<br><i>Oracle</i> : 0.000   |
| CV.min | <b>0.01</b> | <b>0.01</b>     | 0.011            | 11.947      | <b>0.01</b>   |                                                                      |
| AICc   | 0.011       | <b>0.01</b>     | <b>0.01</b>      | 12.032      |               |                                                                      |
| AIC    | 0.025       | 0.029           | 0.057            | 12.162      |               |                                                                      |
| BIC    | 0.020       | 0.020           | 0.020            | 15.925      |               |                                                                      |
| CV.lse | 0.020       | 0.018           | 0.017            | 2.460       | 0.012         | sd( $\mu$ )/ $\sigma = 1$<br>$\rho = 0.9$<br><i>Oracle</i> : 0.000   |
| CV.min | 0.017       | 0.014           | 0.014            | 2.310       | 0.011         |                                                                      |
| AICc   | 0.019       | 0.017           | 0.016            | 2.312       |               |                                                                      |
| AIC    | <b>0.01</b> | <b>0.01</b>     | 0.016            | 2.303       |               |                                                                      |
| BIC    | 0.020       | 0.020           | 0.020            | 2.746       |               |                                                                      |
| CV.lse | <b>0.02</b> | <b>0.02</b>     | <b>0.02</b>      | 113.819     | <b>0.02</b>   | sd( $\mu$ )/ $\sigma = 0.5$<br>$\rho = 0$<br><i>Oracle</i> : 0.010   |
| CV.min | <b>0.02</b> | <b>0.02</b>     | 0.021            | 118.880     | <b>0.02</b>   |                                                                      |
| AICc   | <b>0.02</b> | <b>0.02</b>     | <b>0.02</b>      | 116.011     |               |                                                                      |
| AIC    | 0.285       | 0.420           | 0.948            | 143.937     |               |                                                                      |
| BIC    | <b>0.02</b> | <b>0.02</b>     | <b>0.02</b>      | 119.474     |               |                                                                      |
| CV.lse | <b>0.02</b> | <b>0.02</b>     | <b>0.02</b>      | 40.987      | <b>0.02</b>   | sd( $\mu$ )/ $\sigma = 0.5$<br>$\rho = 0.5$<br><i>Oracle</i> : 0.009 |
| CV.min | <b>0.02</b> | <b>0.02</b>     | <b>0.02</b>      | 42.254      | <b>0.02</b>   |                                                                      |
| AICc   | <b>0.02</b> | <b>0.02</b>     | <b>0.02</b>      | 41.712      |               |                                                                      |
| AIC    | 0.141       | 0.192           | 0.422            | 49.755      |               |                                                                      |
| BIC    | <b>0.02</b> | <b>0.02</b>     | <b>0.02</b>      | 41.303      |               |                                                                      |
| CV.lse | <b>0.02</b> | <b>0.02</b>     | <b>0.02</b>      | 7.500       | <b>0.02</b>   | sd( $\mu$ )/ $\sigma = 0.5$<br>$\rho = 0.9$<br><i>Oracle</i> : 0.009 |
| CV.min | <b>0.02</b> | <b>0.02</b>     | <b>0.02</b>      | 7.406       | <b>0.02</b>   |                                                                      |
| AICc   | <b>0.02</b> | <b>0.02</b>     | <b>0.02</b>      | 7.422       |               |                                                                      |
| AIC    | 0.048       | 0.063           | 0.147            | 7.504       |               |                                                                      |
| BIC    | <b>0.02</b> | <b>0.02</b>     | <b>0.02</b>      | 7.383       |               |                                                                      |

Table 50: Estimation MSE for n=1000, continuous design, sparse covariates, and decay 100.

|        | lasso        | GL $\gamma = 1$ | GL $\gamma = 10$ | marginal AL | sparsenet MCP |                                                                      |
|--------|--------------|-----------------|------------------|-------------|---------------|----------------------------------------------------------------------|
| CV.lse | 0.010        | 0.005           | 0.001            | 14.641      | <b>0</b>      | sd( $\mu$ )/ $\sigma = 2$<br>$\rho = 0$<br><i>Oracle</i> : 0.000     |
| CV.min | 0.007        | 0.001           | <b>0</b>         | 14.173      | <b>0</b>      |                                                                      |
| AICc   | 0.009        | 0.002           | <b>0</b>         | 14.250      |               |                                                                      |
| AIC    | 0.018        | 0.020           | 0.035            | 14.326      |               |                                                                      |
| BIC    | 0.010        | 0.010           | 0.005            | 16.271      |               |                                                                      |
| CV.lse | 0.010        | 0.007           | <b>0</b>         | 6.671       | <b>0</b>      | sd( $\mu$ )/ $\sigma = 2$<br>$\rho = 0.5$<br><i>Oracle</i> : 0.000   |
| CV.min | 0.008        | 0.001           | <b>0</b>         | 6.102       | <b>0</b>      |                                                                      |
| AICc   | 0.010        | 0.007           | <b>0</b>         | 6.348       |               |                                                                      |
| AIC    | 0.010        | 0.010           | 0.015            | 5.976       |               |                                                                      |
| BIC    | 0.040        | 0.039           | 0.004            | 16.698      |               |                                                                      |
| CV.lse | 0.010        | 0.009           | 0.001            | 2.237       | 0.001         | sd( $\mu$ )/ $\sigma = 2$<br>$\rho = 0.9$<br><i>Oracle</i> : 0.000   |
| CV.min | 0.010        | 0.003           | <b>0</b>         | 2.013       | <b>0</b>      |                                                                      |
| AICc   | 0.010        | 0.010           | <b>0</b>         | 2.022       |               |                                                                      |
| AIC    | 0.010        | 0.002           | <b>0</b>         | 2.010       |               |                                                                      |
| BIC    | 0.040        | 0.040           | 0.040            | 2.821       |               |                                                                      |
| CV.lse | 0.022        | 0.023           | 0.030            | 56.693      | 0.021         | sd( $\mu$ )/ $\sigma = 1$<br>$\rho = 0$<br><i>Oracle</i> : 0.004     |
| CV.min | <b>0.02</b>  | <b>0.02</b>     | 0.024            | 56.464      | <b>0.02</b>   |                                                                      |
| AICc   | <b>0.02</b>  | <b>0.02</b>     | 0.027            | 56.219      |               |                                                                      |
| AIC    | 0.101        | 0.133           | 0.281            | 61.526      |               |                                                                      |
| BIC    | 0.040        | 0.040           | 0.040            | 71.760      |               |                                                                      |
| CV.lse | 0.037        | 0.033           | 0.038            | 23.253      | 0.028         | sd( $\mu$ )/ $\sigma = 1$<br>$\rho = 0.5$<br><i>Oracle</i> : 0.000   |
| CV.min | 0.025        | 0.023           | 0.034            | 22.171      | 0.022         |                                                                      |
| AICc   | 0.030        | 0.024           | <b>0.02</b>      | 22.503      |               |                                                                      |
| AIC    | 0.052        | 0.064           | 0.128            | 22.379      |               |                                                                      |
| BIC    | 0.040        | 0.040           | 0.040            | 28.805      |               |                                                                      |
| CV.lse | 0.040        | 0.040           | 0.040            | 4.611       | 0.038         | sd( $\mu$ )/ $\sigma = 1$<br>$\rho = 0.9$<br><i>Oracle</i> : 0.000   |
| CV.min | 0.040        | 0.038           | 0.040            | 4.251       | 0.033         |                                                                      |
| AICc   | 0.040        | 0.040           | 0.039            | 4.227       |               |                                                                      |
| AIC    | <b>0.02</b>  | 0.021           | 0.039            | 4.113       |               |                                                                      |
| BIC    | 0.040        | 0.040           | 0.040            | 4.810       |               |                                                                      |
| CV.lse | 0.040        | 0.040           | 0.040            | 206.405     | 0.040         | sd( $\mu$ )/ $\sigma = 0.5$<br>$\rho = 0$<br><i>Oracle</i> : 0.020   |
| CV.min | 0.039        | 0.040           | 0.041            | 215.140     | 0.039         |                                                                      |
| AICc   | <b>0.038</b> | 0.041           | 0.041            | 209.877     |               |                                                                      |
| AIC    | 0.533        | 0.854           | 1.927            | 261.313     |               |                                                                      |
| BIC    | 0.040        | 0.040           | 0.077            | 214.307     |               |                                                                      |
| CV.lse | <b>0.04</b>  | <b>0.04</b>     | <b>0.04</b>      | 72.558      | <b>0.04</b>   | sd( $\mu$ )/ $\sigma = 0.5$<br>$\rho = 0.5$<br><i>Oracle</i> : 0.010 |
| CV.min | <b>0.04</b>  | <b>0.04</b>     | <b>0.04</b>      | 74.881      | <b>0.04</b>   |                                                                      |
| AICc   | <b>0.04</b>  | <b>0.04</b>     | <b>0.04</b>      | 73.917      |               |                                                                      |
| AIC    | 0.259        | 0.381           | 0.851            | 89.410      |               |                                                                      |
| BIC    | <b>0.04</b>  | <b>0.04</b>     | <b>0.04</b>      | 72.874      |               |                                                                      |
| CV.lse | <b>0.04</b>  | <b>0.04</b>     | <b>0.04</b>      | 12.668      | <b>0.04</b>   | sd( $\mu$ )/ $\sigma = 0.5$<br>$\rho = 0.9$<br><i>Oracle</i> : 0.010 |
| CV.min | <b>0.04</b>  | <b>0.04</b>     | <b>0.04</b>      | 12.572      | <b>0.04</b>   |                                                                      |
| AICc   | <b>0.04</b>  | <b>0.04</b>     | <b>0.04</b>      | 12.607      |               |                                                                      |
| AIC    | 0.102        | 0.144           | 0.330            | 12.810      |               |                                                                      |
| BIC    | <b>0.04</b>  | <b>0.04</b>     | <b>0.04</b>      | 12.542      |               |                                                                      |

Table 51: Estimation MSE for n=1000, continuous design, sparse covariates, and decay 200.

|        | lasso        | GL $\gamma = 1$ | GL $\gamma = 10$ | marginal AL | sparsenet MCP |                                                                        |
|--------|--------------|-----------------|------------------|-------------|---------------|------------------------------------------------------------------------|
| CV.lse | 0.010        | 0.010           | 0.001            | 21.213      | <b>0</b>      | $\text{sd}(\mu)/\sigma = 2$<br>$\rho = 0$<br><i>Oracle</i> : 0.000     |
| CV.min | 0.010        | 0.009           | <b>0</b>         | 20.593      | <b>0</b>      |                                                                        |
| AICc   | 0.010        | 0.009           | 0.002            | 20.694      |               |                                                                        |
| AIC    | 0.027        | 0.031           | 0.058            | 21.019      |               |                                                                        |
| BIC    | 0.013        | 0.010           | 0.006            | 23.085      |               |                                                                        |
| CV.lse | 0.010        | 0.010           | <b>0</b>         | 9.770       | <b>0</b>      | $\text{sd}(\mu)/\sigma = 2$<br>$\rho = 0.5$<br><i>Oracle</i> : 0.000   |
| CV.min | 0.010        | 0.008           | <b>0</b>         | 8.912       | <b>0</b>      |                                                                        |
| AICc   | 0.011        | 0.010           | <b>0</b>         | 9.342       |               |                                                                        |
| AIC    | 0.012        | 0.014           | 0.025            | 8.684       |               |                                                                        |
| BIC    | 0.060        | 0.056           | 0.001            | 25.915      |               |                                                                        |
| CV.lse | 0.011        | 0.010           | <b>0</b>         | 3.342       | <b>0</b>      | $\text{sd}(\mu)/\sigma = 2$<br>$\rho = 0.9$<br><i>Oracle</i> : 0.000   |
| CV.min | 0.010        | 0.008           | <b>0</b>         | 2.877       | <b>0</b>      |                                                                        |
| AICc   | 0.014        | 0.010           | <b>0</b>         | 2.898       |               |                                                                        |
| AIC    | 0.010        | 0.008           | 0.008            | 2.843       |               |                                                                        |
| BIC    | 0.060        | 0.060           | 0.044            | 4.207       |               |                                                                        |
| CV.lse | 0.035        | 0.038           | 0.052            | 84.516      | 0.033         | $\text{sd}(\mu)/\sigma = 1$<br>$\rho = 0$<br><i>Oracle</i> : 0.010     |
| CV.min | <b>0.029</b> | 0.030           | 0.043            | 83.894      | <b>0.029</b>  |                                                                        |
| AICc   | 0.030        | 0.030           | 0.046            | 83.679      |               |                                                                        |
| AIC    | 0.155        | 0.214           | 0.460            | 91.688      |               |                                                                        |
| BIC    | 0.060        | 0.060           | 0.060            | 116.109     |               |                                                                        |
| CV.lse | 0.058        | 0.056           | 0.060            | 35.001      | 0.054         | $\text{sd}(\mu)/\sigma = 1$<br>$\rho = 0.5$<br><i>Oracle</i> : 0.001   |
| CV.min | 0.044        | 0.043           | 0.059            | 33.181      | 0.042         |                                                                        |
| AICc   | 0.051        | 0.040           | <b>0.033</b>     | 33.805      |               |                                                                        |
| AIC    | 0.081        | 0.103           | 0.211            | 33.234      |               |                                                                        |
| BIC    | 0.060        | 0.060           | 0.060            | 42.426      |               |                                                                        |
| CV.lse | 0.060        | 0.060           | 0.060            | 6.958       | 0.060         | $\text{sd}(\mu)/\sigma = 1$<br>$\rho = 0.9$<br><i>Oracle</i> : 0.001   |
| CV.min | 0.060        | 0.060           | 0.060            | 6.412       | 0.059         |                                                                        |
| AICc   | 0.060        | 0.060           | 0.059            | 6.353       |               |                                                                        |
| AIC    | <b>0.034</b> | 0.037           | 0.070            | 5.966       |               |                                                                        |
| BIC    | 0.060        | 0.060           | 0.060            | 7.008       |               |                                                                        |
| CV.lse | 0.060        | 0.060           | 0.060            | 304.998     | 0.060         | $\text{sd}(\mu)/\sigma = 0.5$<br>$\rho = 0$<br><i>Oracle</i> : 0.028   |
| CV.min | 0.058        | 0.061           | 0.062            | 317.792     | 0.058         |                                                                        |
| AICc   | <b>0.057</b> | 0.063           | 0.060            | 309.999     |               |                                                                        |
| AIC    | 0.794        | 1.354           | 3.025            | 386.824     |               |                                                                        |
| BIC    | 0.060        | 0.060           | 0.633            | 315.022     |               |                                                                        |
| CV.lse | <b>0.06</b>  | <b>0.06</b>     | <b>0.06</b>      | 106.431     | <b>0.06</b>   | $\text{sd}(\mu)/\sigma = 0.5$<br>$\rho = 0.5$<br><i>Oracle</i> : 0.016 |
| CV.min | <b>0.06</b>  | <b>0.06</b>     | <b>0.06</b>      | 109.886     | <b>0.06</b>   |                                                                        |
| AICc   | <b>0.06</b>  | <b>0.06</b>     | <b>0.06</b>      | 108.443     |               |                                                                        |
| AIC    | 0.384        | 0.595           | 1.331            | 131.600     |               |                                                                        |
| BIC    | <b>0.06</b>  | <b>0.06</b>     | <b>0.06</b>      | 106.781     |               |                                                                        |
| CV.lse | <b>0.06</b>  | <b>0.06</b>     | <b>0.06</b>      | 18.284      | <b>0.06</b>   | $\text{sd}(\mu)/\sigma = 0.5$<br>$\rho = 0.9$<br><i>Oracle</i> : 0.016 |
| CV.min | <b>0.06</b>  | <b>0.06</b>     | <b>0.06</b>      | 18.183      | <b>0.06</b>   |                                                                        |
| AICc   | <b>0.06</b>  | <b>0.06</b>     | <b>0.06</b>      | 18.231      |               |                                                                        |
| AIC    | 0.163        | 0.243           | 0.557            | 18.642      |               |                                                                        |
| BIC    | <b>0.06</b>  | <b>0.06</b>     | <b>0.06</b>      | 18.188      |               |                                                                        |

Table 52: Estimation MSE for n=100, binary design, dense covariates, and decay 10.

|        | lasso    | GL $\gamma = 1$ | GL $\gamma = 10$ | marginal AL | sparsenet MCP |                                                                        |
|--------|----------|-----------------|------------------|-------------|---------------|------------------------------------------------------------------------|
| CV.lse | <b>0</b> | <b>0</b>        | <b>0</b>         | 0.526       | <b>0</b>      | $\text{sd}(\mu)/\sigma = 2$<br>$\rho = 0$<br><i>Oracle</i> : 0.000     |
| CV.min | <b>0</b> | <b>0</b>        | <b>0</b>         | 0.504       | <b>0</b>      |                                                                        |
| AICc   | <b>0</b> | <b>0</b>        | 0.003            | 0.557       |               |                                                                        |
| AIC    | <b>0</b> | 0.001           | 0.003            | 0.523       |               |                                                                        |
| BIC    | <b>0</b> | 0.001           | 0.003            | 0.530       |               |                                                                        |
| CV.lse | <b>0</b> | <b>0</b>        | <b>0</b>         | 0.485       | <b>0</b>      | $\text{sd}(\mu)/\sigma = 2$<br>$\rho = 0.5$<br><i>Oracle</i> : 0.000   |
| CV.min | <b>0</b> | <b>0</b>        | <b>0</b>         | 0.458       | <b>0</b>      |                                                                        |
| AICc   | <b>0</b> | <b>0</b>        | 0.002            | 0.520       |               |                                                                        |
| AIC    | <b>0</b> | <b>0</b>        | 0.003            | 0.471       |               |                                                                        |
| BIC    | <b>0</b> | <b>0</b>        | 0.003            | 0.478       |               |                                                                        |
| CV.lse | <b>0</b> | <b>0</b>        | <b>0</b>         | 0.472       | <b>0</b>      | $\text{sd}(\mu)/\sigma = 2$<br>$\rho = 0.9$<br><i>Oracle</i> : 0.000   |
| CV.min | <b>0</b> | <b>0</b>        | <b>0</b>         | 0.438       | <b>0</b>      |                                                                        |
| AICc   | <b>0</b> | <b>0</b>        | 0.002            | 0.505       |               |                                                                        |
| AIC    | <b>0</b> | 0.001           | 0.002            | 0.449       |               |                                                                        |
| BIC    | <b>0</b> | 0.001           | 0.002            | 0.457       |               |                                                                        |
| CV.lse | <b>0</b> | <b>0</b>        | <b>0</b>         | 1.794       | <b>0</b>      | $\text{sd}(\mu)/\sigma = 1$<br>$\rho = 0$<br><i>Oracle</i> : 0.000     |
| CV.min | 0.001    | 0.001           | 0.001            | 2.032       | 0.001         |                                                                        |
| AICc   | <b>0</b> | 0.003           | 0.012            | 1.729       |               |                                                                        |
| AIC    | 0.009    | 0.010           | 0.012            | 2.151       |               |                                                                        |
| BIC    | 0.009    | 0.010           | 0.012            | 2.148       |               |                                                                        |
| CV.lse | <b>0</b> | <b>0</b>        | <b>0</b>         | 1.635       | <b>0</b>      | $\text{sd}(\mu)/\sigma = 1$<br>$\rho = 0.5$<br><i>Oracle</i> : 0.000   |
| CV.min | <b>0</b> | 0.001           | 0.001            | 1.831       | 0.001         |                                                                        |
| AICc   | <b>0</b> | 0.002           | 0.011            | 1.573       |               |                                                                        |
| AIC    | 0.008    | 0.010           | 0.011            | 1.930       |               |                                                                        |
| BIC    | 0.008    | 0.010           | 0.011            | 1.927       |               |                                                                        |
| CV.lse | <b>0</b> | <b>0</b>        | <b>0</b>         | 1.545       | <b>0</b>      | $\text{sd}(\mu)/\sigma = 1$<br>$\rho = 0.9$<br><i>Oracle</i> : 0.000   |
| CV.min | 0.001    | 0.001           | 0.001            | 1.724       | 0.001         |                                                                        |
| AICc   | <b>0</b> | 0.001           | 0.011            | 1.501       |               |                                                                        |
| AIC    | 0.009    | 0.010           | 0.011            | 1.828       |               |                                                                        |
| BIC    | 0.009    | 0.010           | 0.011            | 1.824       |               |                                                                        |
| CV.lse | <b>0</b> | <b>0</b>        | <b>0</b>         | 6.910       | <b>0</b>      | $\text{sd}(\mu)/\sigma = 0.5$<br>$\rho = 0$<br><i>Oracle</i> : 0.002   |
| CV.min | 0.002    | 0.002           | 0.001            | 8.222       | 0.003         |                                                                        |
| AICc   | 0.003    | 0.014           | 0.035            | 6.009       |               |                                                                        |
| AIC    | 0.014    | 0.023           | 0.036            | 8.741       |               |                                                                        |
| BIC    | 0.014    | 0.023           | 0.036            | 8.737       |               |                                                                        |
| CV.lse | <b>0</b> | <b>0</b>        | <b>0</b>         | 6.196       | <b>0</b>      | $\text{sd}(\mu)/\sigma = 0.5$<br>$\rho = 0.5$<br><i>Oracle</i> : 0.002 |
| CV.min | 0.002    | 0.002           | 0.001            | 7.376       | 0.003         |                                                                        |
| AICc   | 0.003    | 0.012           | 0.032            | 5.391       |               |                                                                        |
| AIC    | 0.013    | 0.021           | 0.032            | 7.792       |               |                                                                        |
| BIC    | 0.013    | 0.021           | 0.032            | 7.788       |               |                                                                        |
| CV.lse | <b>0</b> | <b>0</b>        | <b>0</b>         | 5.855       | <b>0</b>      | $\text{sd}(\mu)/\sigma = 0.5$<br>$\rho = 0.9$<br><i>Oracle</i> : 0.001 |
| CV.min | 0.002    | 0.002           | 0.001            | 6.969       | 0.003         |                                                                        |
| AICc   | 0.003    | 0.011           | 0.031            | 5.154       |               |                                                                        |
| AIC    | 0.013    | 0.020           | 0.031            | 7.417       |               |                                                                        |
| BIC    | 0.013    | 0.020           | 0.031            | 7.409       |               |                                                                        |

Table 53: Estimation MSE for n=100, binary design, dense covariates, and decay 50.

|        | lasso        | GL $\gamma = 1$ | GL $\gamma = 10$ | marginal AL | sparsenet MCP |                                                                      |
|--------|--------------|-----------------|------------------|-------------|---------------|----------------------------------------------------------------------|
| CV.lse | <b>0.02</b>  | 0.021           | 0.021            | 3.271       | 0.021         | sd( $\mu$ )/ $\sigma = 2$<br>$\rho = 0$<br><i>Oracle</i> : 0.026     |
| CV.min | 0.022        | 0.023           | 0.022            | 2.949       | 0.024         |                                                                      |
| AICc   | 0.022        | 0.037           | 0.059            | 4.316       |               |                                                                      |
| AIC    | 0.032        | 0.042           | 0.059            | 2.944       |               |                                                                      |
| BIC    | 0.032        | 0.042           | 0.059            | 2.943       |               |                                                                      |
| CV.lse | <b>0.02</b>  | 0.021           | 0.021            | 2.960       | 0.021         | sd( $\mu$ )/ $\sigma = 2$<br>$\rho = 0.5$<br><i>Oracle</i> : 0.022   |
| CV.min | 0.022        | 0.022           | 0.022            | 2.638       | 0.023         |                                                                      |
| AICc   | 0.022        | 0.035           | 0.055            | 3.860       |               |                                                                      |
| AIC    | 0.032        | 0.041           | 0.055            | 2.633       |               |                                                                      |
| BIC    | 0.032        | 0.041           | 0.055            | 2.632       |               |                                                                      |
| CV.lse | <b>0.02</b>  | <b>0.02</b>     | <b>0.02</b>      | 2.894       | <b>0.02</b>   | sd( $\mu$ )/ $\sigma = 2$<br>$\rho = 0.9$<br><i>Oracle</i> : 0.021   |
| CV.min | 0.022        | 0.022           | 0.022            | 2.504       | 0.023         |                                                                      |
| AICc   | 0.021        | 0.033           | 0.054            | 3.772       |               |                                                                      |
| AIC    | 0.032        | 0.039           | 0.054            | 2.486       |               |                                                                      |
| BIC    | 0.032        | 0.039           | 0.054            | 2.487       |               |                                                                      |
| CV.lse | <b>0.021</b> | <b>0.021</b>    | <b>0.021</b>     | 10.258      | <b>0.021</b>  | sd( $\mu$ )/ $\sigma = 1$<br>$\rho = 0$<br><i>Oracle</i> : 0.031     |
| CV.min | 0.024        | 0.023           | 0.022            | 11.337      | 0.024         |                                                                      |
| AICc   | 0.024        | 0.057           | 0.092            | 10.122      |               |                                                                      |
| AIC    | 0.043        | 0.064           | 0.092            | 11.795      |               |                                                                      |
| BIC    | 0.043        | 0.064           | 0.092            | 11.790      |               |                                                                      |
| CV.lse | <b>0.021</b> | <b>0.021</b>    | <b>0.021</b>     | 9.188       | <b>0.021</b>  | sd( $\mu$ )/ $\sigma = 1$<br>$\rho = 0.5$<br><i>Oracle</i> : 0.029   |
| CV.min | 0.024        | 0.023           | 0.022            | 10.122      | 0.024         |                                                                      |
| AICc   | 0.024        | 0.053           | 0.085            | 9.087       |               |                                                                      |
| AIC    | 0.042        | 0.060           | 0.085            | 10.520      |               |                                                                      |
| BIC    | 0.042        | 0.060           | 0.085            | 10.516      |               |                                                                      |
| CV.lse | <b>0.021</b> | <b>0.021</b>    | <b>0.021</b>     | 8.725       | <b>0.021</b>  | sd( $\mu$ )/ $\sigma = 1$<br>$\rho = 0.9$<br><i>Oracle</i> : 0.026   |
| CV.min | 0.023        | 0.022           | 0.022            | 9.513       | 0.024         |                                                                      |
| AICc   | 0.023        | 0.050           | 0.079            | 8.655       |               |                                                                      |
| AIC    | 0.041        | 0.057           | 0.079            | 9.933       |               |                                                                      |
| BIC    | 0.041        | 0.057           | 0.079            | 9.929       |               |                                                                      |
| CV.lse | <b>0.022</b> | <b>0.022</b>    | 0.023            | 37.726      | 0.023         | sd( $\mu$ )/ $\sigma = 0.5$<br>$\rho = 0$<br><i>Oracle</i> : 0.039   |
| CV.min | 0.026        | 0.025           | 0.025            | 44.850      | 0.027         |                                                                      |
| AICc   | 0.027        | 0.144           | 0.217            | 32.632      |               |                                                                      |
| AIC    | 0.084        | 0.153           | 0.217            | 47.153      |               |                                                                      |
| BIC    | 0.084        | 0.153           | 0.217            | 47.137      |               |                                                                      |
| CV.lse | <b>0.022</b> | <b>0.022</b>    | <b>0.022</b>     | 33.791      | <b>0.022</b>  | sd( $\mu$ )/ $\sigma = 0.5$<br>$\rho = 0.5$<br><i>Oracle</i> : 0.037 |
| CV.min | 0.026        | 0.024           | 0.024            | 39.934      | 0.026         |                                                                      |
| AICc   | 0.026        | 0.131           | 0.196            | 29.173      |               |                                                                      |
| AIC    | 0.078        | 0.140           | 0.196            | 42.191      |               |                                                                      |
| BIC    | 0.078        | 0.140           | 0.196            | 42.173      |               |                                                                      |
| CV.lse | <b>0.022</b> | <b>0.022</b>    | <b>0.022</b>     | 31.349      | <b>0.022</b>  | sd( $\mu$ )/ $\sigma = 0.5$<br>$\rho = 0.9$<br><i>Oracle</i> : 0.034 |
| CV.min | 0.026        | 0.024           | 0.024            | 37.309      | 0.027         |                                                                      |
| AICc   | 0.026        | 0.122           | 0.188            | 27.516      |               |                                                                      |
| AIC    | 0.077        | 0.131           | 0.188            | 39.711      |               |                                                                      |
| BIC    | 0.077        | 0.131           | 0.188            | 39.694      |               |                                                                      |

Table 54: Estimation MSE for n=100, binary design, dense covariates, and decay 100.

|        | lasso       | GL $\gamma = 1$ | GL $\gamma = 10$ | marginal AL | sparsenet MCP |                                                                        |
|--------|-------------|-----------------|------------------|-------------|---------------|------------------------------------------------------------------------|
| CV.lse | <b>0.05</b> | <b>0.05</b>     | <b>0.05</b>      | 6.717       | <b>0.05</b>   | $\text{sd}(\mu)/\sigma = 2$<br>$\rho = 0$<br><i>Oracle</i> : 296.861   |
| CV.min | 0.051       | 0.052           | 0.051            | 6.017       | 0.052         |                                                                        |
| AICc   | <b>0.05</b> | 0.091           | 0.130            | 9.026       |               |                                                                        |
| AIC    | 0.068       | 0.096           | 0.130            | 5.986       |               |                                                                        |
| BIC    | 0.068       | 0.096           | 0.130            | 5.984       |               |                                                                        |
| CV.lse | <b>0.05</b> | <b>0.05</b>     | <b>0.05</b>      | 6.066       | <b>0.05</b>   | $\text{sd}(\mu)/\sigma = 2$<br>$\rho = 0.5$<br><i>Oracle</i> : 6.607   |
| CV.min | 0.051       | 0.051           | 0.051            | 5.381       | 0.052         |                                                                        |
| AICc   | <b>0.05</b> | 0.084           | 0.121            | 8.156       |               |                                                                        |
| AIC    | 0.067       | 0.090           | 0.121            | 5.337       |               |                                                                        |
| BIC    | 0.067       | 0.090           | 0.121            | 5.335       |               |                                                                        |
| CV.lse | <b>0.05</b> | <b>0.05</b>     | <b>0.05</b>      | 5.905       | <b>0.05</b>   | $\text{sd}(\mu)/\sigma = 2$<br>$\rho = 0.9$<br><i>Oracle</i> : 8.065   |
| CV.min | 0.051       | 0.051           | 0.051            | 5.100       | 0.052         |                                                                        |
| AICc   | <b>0.05</b> | 0.082           | 0.116            | 7.866       |               |                                                                        |
| AIC    | 0.066       | 0.088           | 0.116            | 5.030       |               |                                                                        |
| BIC    | 0.066       | 0.088           | 0.116            | 5.029       |               |                                                                        |
| CV.lse | <b>0.05</b> | <b>0.05</b>     | <b>0.05</b>      | 20.893      | <b>0.05</b>   | $\text{sd}(\mu)/\sigma = 1$<br>$\rho = 0$<br><i>Oracle</i> : 0.122     |
| CV.min | 0.052       | 0.052           | 0.052            | 22.993      | 0.053         |                                                                        |
| AICc   | 0.051       | 0.133           | 0.194            | 20.644      |               |                                                                        |
| AIC    | 0.088       | 0.141           | 0.194            | 23.877      |               |                                                                        |
| BIC    | 0.088       | 0.141           | 0.194            | 23.868      |               |                                                                        |
| CV.lse | <b>0.05</b> | <b>0.05</b>     | <b>0.05</b>      | 18.668      | <b>0.05</b>   | $\text{sd}(\mu)/\sigma = 1$<br>$\rho = 0.5$<br><i>Oracle</i> : 0.100   |
| CV.min | 0.052       | 0.052           | 0.051            | 20.455      | 0.053         |                                                                        |
| AICc   | 0.051       | 0.124           | 0.180            | 18.486      |               |                                                                        |
| AIC    | 0.086       | 0.131           | 0.181            | 21.260      |               |                                                                        |
| BIC    | 0.086       | 0.131           | 0.181            | 21.249      |               |                                                                        |
| CV.lse | <b>0.05</b> | <b>0.05</b>     | <b>0.05</b>      | 17.702      | <b>0.05</b>   | $\text{sd}(\mu)/\sigma = 1$<br>$\rho = 0.9$<br><i>Oracle</i> : 0.099   |
| CV.min | 0.052       | 0.052           | 0.052            | 19.251      | 0.053         |                                                                        |
| AICc   | 0.051       | 0.118           | 0.168            | 17.562      |               |                                                                        |
| AIC    | 0.084       | 0.126           | 0.168            | 20.094      |               |                                                                        |
| BIC    | 0.084       | 0.126           | 0.168            | 20.083      |               |                                                                        |
| CV.lse | <b>0.05</b> | <b>0.05</b>     | 0.051            | 76.347      | <b>0.05</b>   | $\text{sd}(\mu)/\sigma = 0.5$<br>$\rho = 0$<br><i>Oracle</i> : 0.080   |
| CV.min | 0.055       | 0.054           | 0.054            | 90.392      | 0.057         |                                                                        |
| AICc   | 0.054       | 0.322           | 0.461            | 66.067      |               |                                                                        |
| AIC    | 0.170       | 0.334           | 0.462            | 95.261      |               |                                                                        |
| BIC    | 0.170       | 0.334           | 0.462            | 95.227      |               |                                                                        |
| CV.lse | <b>0.05</b> | <b>0.05</b>     | <b>0.05</b>      | 68.388      | <b>0.05</b>   | $\text{sd}(\mu)/\sigma = 0.5$<br>$\rho = 0.5$<br><i>Oracle</i> : 0.078 |
| CV.min | 0.054       | 0.054           | 0.053            | 80.836      | 0.056         |                                                                        |
| AICc   | 0.054       | 0.288           | 0.411            | 58.981      |               |                                                                        |
| AIC    | 0.158       | 0.299           | 0.412            | 85.029      |               |                                                                        |
| BIC    | 0.158       | 0.299           | 0.412            | 84.994      |               |                                                                        |
| CV.lse | <b>0.05</b> | <b>0.05</b>     | 0.051            | 63.175      | <b>0.05</b>   | $\text{sd}(\mu)/\sigma = 0.5$<br>$\rho = 0.9$<br><i>Oracle</i> : 0.073 |
| CV.min | 0.055       | 0.054           | 0.054            | 75.478      | 0.056         |                                                                        |
| AICc   | 0.054       | 0.271           | 0.391            | 55.779      |               |                                                                        |
| AIC    | 0.155       | 0.283           | 0.392            | 80.331      |               |                                                                        |
| BIC    | 0.155       | 0.283           | 0.392            | 80.236      |               |                                                                        |

Table 55: Estimation MSE for n=100, binary design, dense covariates, and decay 200.

|        | lasso        | GL $\gamma = 1$ | GL $\gamma = 10$ | marginal AL | sparsenet MCP |                                                                         |
|--------|--------------|-----------------|------------------|-------------|---------------|-------------------------------------------------------------------------|
| CV.lse | <b>0.1</b>   | <b>0.1</b>      | <b>0.1</b>       | 13.601      | <b>0.1</b>    | $\text{sd}(\mu)/\sigma = 2$<br>$\rho = 0$<br><i>Oracle</i> : 3349.772   |
| CV.min | 0.103        | 0.103           | 0.103            | 12.016      | 0.105         |                                                                         |
| AICc   | 0.101        | 0.199           | 0.273            | 18.227      |               |                                                                         |
| AIC    | 0.140        | 0.205           | 0.273            | 11.966      |               |                                                                         |
| BIC    | 0.140        | 0.205           | 0.273            | 11.962      |               |                                                                         |
| CV.lse | <b>0.1</b>   | <b>0.1</b>      | <b>0.1</b>       | 12.342      | <b>0.1</b>    | $\text{sd}(\mu)/\sigma = 2$<br>$\rho = 0.5$<br><i>Oracle</i> : 1995.095 |
| CV.min | 0.102        | 0.102           | 0.102            | 10.791      | 0.103         |                                                                         |
| AICc   | 0.101        | 0.188           | 0.257            | 16.688      |               |                                                                         |
| AIC    | 0.138        | 0.195           | 0.258            | 10.703      |               |                                                                         |
| BIC    | 0.138        | 0.195           | 0.258            | 10.700      |               |                                                                         |
| CV.lse | <b>0.1</b>   | <b>0.1</b>      | <b>0.1</b>       | 11.951      | <b>0.1</b>    | $\text{sd}(\mu)/\sigma = 2$<br>$\rho = 0.9$<br><i>Oracle</i> : 353.306  |
| CV.min | 0.102        | 0.102           | 0.102            | 10.239      | 0.103         |                                                                         |
| AICc   | 0.101        | 0.182           | 0.241            | 15.861      |               |                                                                         |
| AIC    | 0.136        | 0.188           | 0.242            | 10.121      |               |                                                                         |
| BIC    | 0.136        | 0.188           | 0.242            | 10.119      |               |                                                                         |
| CV.lse | <b>0.1</b>   | <b>0.1</b>      | <b>0.1</b>       | 42.180      | <b>0.1</b>    | $\text{sd}(\mu)/\sigma = 1$<br>$\rho = 0$<br><i>Oracle</i> : 1.151      |
| CV.min | 0.105        | 0.104           | 0.104            | 46.230      | 0.106         |                                                                         |
| AICc   | 0.103        | 0.294           | 0.404            | 41.661      |               |                                                                         |
| AIC    | 0.180        | 0.303           | 0.404            | 47.906      |               |                                                                         |
| BIC    | 0.180        | 0.303           | 0.404            | 47.889      |               |                                                                         |
| CV.lse | <b>0.1</b>   | <b>0.1</b>      | 0.101            | 37.519      | <b>0.1</b>    | $\text{sd}(\mu)/\sigma = 1$<br>$\rho = 0.5$<br><i>Oracle</i> : 0.666    |
| CV.min | 0.104        | 0.104           | 0.103            | 41.164      | 0.106         |                                                                         |
| AICc   | 0.103        | 0.275           | 0.375            | 37.226      |               |                                                                         |
| AIC    | 0.175        | 0.283           | 0.375            | 42.685      |               |                                                                         |
| BIC    | 0.175        | 0.283           | 0.375            | 42.673      |               |                                                                         |
| CV.lse | <b>0.1</b>   | <b>0.1</b>      | <b>0.1</b>       | 35.715      | <b>0.1</b>    | $\text{sd}(\mu)/\sigma = 1$<br>$\rho = 0.9$<br><i>Oracle</i> : 0.941    |
| CV.min | 0.104        | 0.104           | 0.103            | 38.820      | 0.106         |                                                                         |
| AICc   | 0.103        | 0.259           | 0.355            | 35.322      |               |                                                                         |
| AIC    | 0.172        | 0.268           | 0.355            | 40.488      |               |                                                                         |
| BIC    | 0.172        | 0.268           | 0.355            | 40.475      |               |                                                                         |
| CV.lse | <b>0.101</b> | <b>0.101</b>    | <b>0.101</b>     | 154.796     | <b>0.101</b>  | $\text{sd}(\mu)/\sigma = 0.5$<br>$\rho = 0$<br><i>Oracle</i> : 0.159    |
| CV.min | 0.111        | 0.108           | 0.109            | 182.987     | 0.115         |                                                                         |
| AICc   | 0.110        | 0.716           | 0.957            | 133.295     |               |                                                                         |
| AIC    | 0.342        | 0.728           | 0.957            | 192.590     |               |                                                                         |
| BIC    | 0.341        | 0.728           | 0.957            | 192.499     |               |                                                                         |
| CV.lse | <b>0.101</b> | <b>0.101</b>    | <b>0.101</b>     | 136.826     | <b>0.101</b>  | $\text{sd}(\mu)/\sigma = 0.5$<br>$\rho = 0.5$<br><i>Oracle</i> : 0.156  |
| CV.min | 0.109        | 0.108           | 0.107            | 162.564     | 0.114         |                                                                         |
| AICc   | 0.109        | 0.638           | 0.846            | 118.647     |               |                                                                         |
| AIC    | 0.320        | 0.652           | 0.846            | 171.265     |               |                                                                         |
| BIC    | 0.320        | 0.652           | 0.846            | 171.200     |               |                                                                         |
| CV.lse | <b>0.101</b> | <b>0.101</b>    | <b>0.101</b>     | 127.348     | <b>0.101</b>  | $\text{sd}(\mu)/\sigma = 0.5$<br>$\rho = 0.9$<br><i>Oracle</i> : 0.147  |
| CV.min | 0.110        | 0.108           | 0.107            | 151.934     | 0.114         |                                                                         |
| AICc   | 0.109        | 0.596           | 0.799            | 112.301     |               |                                                                         |
| AIC    | 0.316        | 0.611           | 0.799            | 161.486     |               |                                                                         |
| BIC    | 0.315        | 0.611           | 0.799            | 161.418     |               |                                                                         |

Table 56: Estimation MSE for n=100, continuous design, dense covariates, and decay 10.

|        | lasso        | GL $\gamma = 1$ | GL $\gamma = 10$ | marginal AL | sparsenet MCP |                                                                      |
|--------|--------------|-----------------|------------------|-------------|---------------|----------------------------------------------------------------------|
| CV.lse | <b>0</b>     | <b>0</b>        | <b>0</b>         | 2.108       | <b>0</b>      | sd( $\mu$ )/ $\sigma = 2$<br>$\rho = 0$<br><i>Oracle</i> : 0.000     |
| CV.min | <b>0</b>     | <b>0</b>        | <b>0</b>         | 2.030       | <b>0</b>      |                                                                      |
| AICc   | <b>0</b>     | <b>0</b>        | 0.002            | 2.237       |               |                                                                      |
| AIC    | <b>0</b>     | <b>0</b>        | 0.002            | 2.101       |               |                                                                      |
| BIC    | <b>0</b>     | <b>0</b>        | 0.002            | 2.146       |               |                                                                      |
| CV.lse | <b>0</b>     | <b>0</b>        | <b>0</b>         | 1.037       | <b>0</b>      | sd( $\mu$ )/ $\sigma = 2$<br>$\rho = 0.5$<br><i>Oracle</i> : 0.000   |
| CV.min | <b>0</b>     | <b>0</b>        | <b>0</b>         | 0.843       | <b>0</b>      |                                                                      |
| AICc   | <b>0</b>     | <b>0</b>        | 0.002            | 1.166       |               |                                                                      |
| AIC    | <b>0</b>     | <b>0</b>        | 0.002            | 0.814       |               |                                                                      |
| BIC    | <b>0</b>     | <b>0</b>        | 0.002            | 0.907       |               |                                                                      |
| CV.lse | <b>0</b>     | <b>0</b>        | <b>0</b>         | 0.289       | <b>0</b>      | sd( $\mu$ )/ $\sigma = 2$<br>$\rho = 0.9$<br><i>Oracle</i> : 0.000   |
| CV.min | <b>0</b>     | <b>0</b>        | <b>0</b>         | 0.222       | <b>0</b>      |                                                                      |
| AICc   | <b>0</b>     | <b>0</b>        | <b>0</b>         | 0.247       |               |                                                                      |
| AIC    | <b>0</b>     | <b>0</b>        | <b>0</b>         | 0.199       |               |                                                                      |
| BIC    | <b>0</b>     | <b>0</b>        | <b>0</b>         | 0.316       |               |                                                                      |
| CV.lse | <b>0</b>     | <b>0</b>        | <b>0</b>         | 7.245       | <b>0</b>      | sd( $\mu$ )/ $\sigma = 1$<br>$\rho = 0$<br><i>Oracle</i> : 0.000     |
| CV.min | <b>0</b>     | 0.001           | 0.001            | 8.172       | 0.001         |                                                                      |
| AICc   | <b>0</b>     | <b>0</b>        | 0.010            | 6.939       |               |                                                                      |
| AIC    | 0.008        | 0.010           | 0.010            | 8.655       |               |                                                                      |
| BIC    | 0.008        | 0.010           | 0.010            | 8.634       |               |                                                                      |
| CV.lse | <b>0</b>     | <b>0</b>        | <b>0</b>         | 2.827       | <b>0</b>      | sd( $\mu$ )/ $\sigma = 1$<br>$\rho = 0.5$<br><i>Oracle</i> : 0.000   |
| CV.min | <b>0</b>     | <b>0</b>        | <b>0</b>         | 3.070       | <b>0</b>      |                                                                      |
| AICc   | <b>0</b>     | <b>0</b>        | 0.009            | 2.782       |               |                                                                      |
| AIC    | 0.006        | 0.008           | 0.010            | 3.273       |               |                                                                      |
| BIC    | 0.006        | 0.008           | 0.010            | 3.264       |               |                                                                      |
| CV.lse | <b>0</b>     | <b>0</b>        | <b>0</b>         | 0.717       | <b>0</b>      | sd( $\mu$ )/ $\sigma = 1$<br>$\rho = 0.9$<br><i>Oracle</i> : 0.000   |
| CV.min | <b>0</b>     | <b>0</b>        | <b>0</b>         | 0.696       | <b>0</b>      |                                                                      |
| AICc   | <b>0</b>     | <b>0</b>        | <b>0</b>         | 0.682       |               |                                                                      |
| AIC    | <b>0</b>     | 0.001           | 0.004            | 0.805       |               |                                                                      |
| BIC    | <b>0</b>     | 0.001           | 0.004            | 0.700       |               |                                                                      |
| CV.lse | <b>0.001</b> | <b>0.001</b>    | <b>0.001</b>     | 27.723      | <b>0.001</b>  | sd( $\mu$ )/ $\sigma = 0.5$<br>$\rho = 0$<br><i>Oracle</i> : 0.001   |
| CV.min | 0.003        | 0.002           | 0.002            | 33.054      | 0.003         |                                                                      |
| AICc   | 0.003        | 0.005           | 0.031            | 24.010      |               |                                                                      |
| AIC    | 0.012        | 0.020           | 0.031            | 35.085      |               |                                                                      |
| BIC    | 0.012        | 0.020           | 0.031            | 35.070      |               |                                                                      |
| CV.lse | <b>0</b>     | <b>0</b>        | <b>0</b>         | 10.083      | <b>0</b>      | sd( $\mu$ )/ $\sigma = 0.5$<br>$\rho = 0.5$<br><i>Oracle</i> : 0.000 |
| CV.min | 0.001        | 0.001           | 0.001            | 12.084      | 0.001         |                                                                      |
| AICc   | 0.001        | <b>0</b>        | 0.013            | 9.107       |               |                                                                      |
| AIC    | 0.010        | 0.010           | 0.013            | 13.175      |               |                                                                      |
| BIC    | 0.010        | 0.010           | 0.013            | 13.156      |               |                                                                      |
| CV.lse | <b>0</b>     | <b>0</b>        | <b>0</b>         | 2.291       | <b>0</b>      | sd( $\mu$ )/ $\sigma = 0.5$<br>$\rho = 0.9$<br><i>Oracle</i> : 0.001 |
| CV.min | <b>0</b>     | <b>0</b>        | <b>0</b>         | 2.528       | <b>0</b>      |                                                                      |
| AICc   | <b>0</b>     | <b>0</b>        | 0.006            | 2.341       |               |                                                                      |
| AIC    | 0.010        | 0.010           | 0.010            | 3.436       |               |                                                                      |
| BIC    | 0.010        | 0.010           | 0.010            | 2.661       |               |                                                                      |



Table 57: Estimation MSE for n=100, continuous design, dense covariates, and decay 50.

|        | lasso        | GL $\gamma = 1$ | GL $\gamma = 10$ | marginal AL | sparsenet MCP |                                                                        |
|--------|--------------|-----------------|------------------|-------------|---------------|------------------------------------------------------------------------|
| CV.lse | <b>0.022</b> | <b>0.022</b>    | <b>0.022</b>     | 13.270      | <b>0.022</b>  | $\text{sd}(\mu)/\sigma = 2$<br>$\rho = 0$<br><i>Oracle</i> : 0.021     |
| CV.min | 0.023        | 0.023           | 0.023            | 11.890      | 0.023         |                                                                        |
| AICc   | <b>0.022</b> | 0.028           | 0.052            | 17.111      |               |                                                                        |
| AIC    | 0.030        | 0.039           | 0.052            | 11.862      |               |                                                                        |
| BIC    | 0.030        | 0.039           | 0.052            | 11.857      |               |                                                                        |
| CV.lse | <b>0.02</b>  | <b>0.02</b>     | <b>0.02</b>      | 5.378       | <b>0.02</b>   | $\text{sd}(\mu)/\sigma = 2$<br>$\rho = 0.5$<br><i>Oracle</i> : 0.014   |
| CV.min | 0.021        | 0.021           | 0.021            | 4.240       | 0.021         |                                                                        |
| AICc   | 0.021        | 0.021           | 0.034            | 6.623       |               |                                                                        |
| AIC    | 0.030        | 0.030           | 0.034            | 4.065       |               |                                                                        |
| BIC    | 0.030        | 0.030           | 0.034            | 4.064       |               |                                                                        |
| CV.lse | <b>0.02</b>  | <b>0.02</b>     | <b>0.02</b>      | 1.542       | <b>0.02</b>   | $\text{sd}(\mu)/\sigma = 2$<br>$\rho = 0.9$<br><i>Oracle</i> : 0.013   |
| CV.min | <b>0.02</b>  | <b>0.02</b>     | <b>0.02</b>      | 1.121       | <b>0.02</b>   |                                                                        |
| AICc   | <b>0.02</b>  | <b>0.02</b>     | 0.024            | 1.262       |               |                                                                        |
| AIC    | 0.023        | 0.026           | 0.029            | 0.737       |               |                                                                        |
| BIC    | 0.023        | 0.026           | 0.029            | 1.378       |               |                                                                        |
| CV.lse | <b>0.023</b> | <b>0.023</b>    | <b>0.023</b>     | 41.467      | <b>0.023</b>  | $\text{sd}(\mu)/\sigma = 1$<br>$\rho = 0$<br><i>Oracle</i> : 0.027     |
| CV.min | 0.025        | 0.025           | 0.024            | 45.677      | 0.026         |                                                                        |
| AICc   | 0.025        | 0.042           | 0.080            | 40.704      |               |                                                                        |
| AIC    | 0.039        | 0.057           | 0.080            | 47.412      |               |                                                                        |
| BIC    | 0.039        | 0.057           | 0.080            | 47.393      |               |                                                                        |
| CV.lse | <b>0.021</b> | <b>0.021</b>    | <b>0.021</b>     | 14.363      | <b>0.021</b>  | $\text{sd}(\mu)/\sigma = 1$<br>$\rho = 0.5$<br><i>Oracle</i> : 0.019   |
| CV.min | 0.022        | 0.022           | <b>0.021</b>     | 15.423      | 0.022         |                                                                        |
| AICc   | 0.022        | 0.022           | 0.043            | 14.342      |               |                                                                        |
| AIC    | 0.030        | 0.035           | 0.043            | 16.291      |               |                                                                        |
| BIC    | 0.030        | 0.035           | 0.043            | 16.279      |               |                                                                        |
| CV.lse | <b>0.02</b>  | <b>0.02</b>     | <b>0.02</b>      | 2.822       | <b>0.02</b>   | $\text{sd}(\mu)/\sigma = 1$<br>$\rho = 0.9$<br><i>Oracle</i> : 0.019   |
| CV.min | <b>0.02</b>  | <b>0.02</b>     | <b>0.02</b>      | 2.616       | <b>0.02</b>   |                                                                        |
| AICc   | <b>0.02</b>  | <b>0.02</b>     | 0.028            | 2.648       |               |                                                                        |
| AIC    | 0.029        | 0.030           | 0.030            | 2.884       |               |                                                                        |
| BIC    | 0.029        | 0.030           | 0.030            | 2.875       |               |                                                                        |
| CV.lse | <b>0.025</b> | <b>0.025</b>    | 0.026            | 151.728     | 0.026         | $\text{sd}(\mu)/\sigma = 0.5$<br>$\rho = 0$<br><i>Oracle</i> : 0.037   |
| CV.min | 0.028        | 0.027           | 0.027            | 180.429     | 0.029         |                                                                        |
| AICc   | 0.028        | 0.121           | 0.188            | 131.418     |               |                                                                        |
| AIC    | 0.074        | 0.134           | 0.188            | 190.125     |               |                                                                        |
| BIC    | 0.074        | 0.133           | 0.188            | 190.049     |               |                                                                        |
| CV.lse | <b>0.023</b> | <b>0.023</b>    | <b>0.023</b>     | 49.491      | <b>0.023</b>  | $\text{sd}(\mu)/\sigma = 0.5$<br>$\rho = 0.5$<br><i>Oracle</i> : 0.027 |
| CV.min | 0.025        | 0.024           | <b>0.023</b>     | 59.331      | 0.025         |                                                                        |
| AICc   | 0.025        | 0.038           | 0.080            | 44.999      |               |                                                                        |
| AIC    | 0.042        | 0.059           | 0.080            | 64.967      |               |                                                                        |
| BIC    | 0.042        | 0.059           | 0.080            | 64.933      |               |                                                                        |
| CV.lse | <b>0.02</b>  | <b>0.02</b>     | <b>0.02</b>      | 7.840       | <b>0.02</b>   | $\text{sd}(\mu)/\sigma = 0.5$<br>$\rho = 0.9$<br><i>Oracle</i> : 0.025 |
| CV.min | 0.021        | 0.021           | 0.021            | 8.639       | 0.021         |                                                                        |
| AICc   | 0.021        | <b>0.02</b>     | 0.039            | 8.095       |               |                                                                        |
| AIC    | 0.030        | 0.033           | 0.039            | 11.561      |               |                                                                        |
| BIC    | 0.030        | 0.033           | 0.039            | 10.161      |               |                                                                        |

Table 58: Estimation MSE for n=100, continuous design, dense covariates, and decay 100.

|        | lasso        | GL $\gamma = 1$ | GL $\gamma = 10$ | marginal AL | sparsenet MCP |                                                                        |
|--------|--------------|-----------------|------------------|-------------|---------------|------------------------------------------------------------------------|
| CV.1se | <b>0.05</b>  | <b>0.05</b>     | <b>0.05</b>      | 27.338      | <b>0.05</b>   | $\text{sd}(\mu)/\sigma = 2$<br>$\rho = 0$<br><i>Oracle</i> : 26.263    |
| CV.min | 0.051        | 0.051           | 0.051            | 24.187      | 0.052         |                                                                        |
| AICc   | <b>0.05</b>  | 0.075           | 0.114            | 36.340      |               |                                                                        |
| AIC    | 0.063        | 0.087           | 0.114            | 24.103      |               |                                                                        |
| BIC    | 0.063        | 0.087           | 0.114            | 24.111      |               |                                                                        |
| CV.1se | <b>0.05</b>  | <b>0.05</b>     | <b>0.05</b>      | 10.857      | <b>0.05</b>   | $\text{sd}(\mu)/\sigma = 2$<br>$\rho = 0.5$<br><i>Oracle</i> : 15.203  |
| CV.min | <b>0.05</b>  | <b>0.05</b>     | <b>0.05</b>      | 8.558       | <b>0.05</b>   |                                                                        |
| AICc   | <b>0.05</b>  | 0.051           | 0.072            | 13.377      |               |                                                                        |
| AIC    | 0.055        | 0.061           | 0.072            | 8.167       |               |                                                                        |
| BIC    | 0.055        | 0.061           | 0.072            | 8.199       |               |                                                                        |
| CV.1se | <b>0.05</b>  | <b>0.05</b>     | <b>0.05</b>      | 3.000       | <b>0.05</b>   | $\text{sd}(\mu)/\sigma = 2$<br>$\rho = 0.9$<br><i>Oracle</i> : 12.752  |
| CV.min | <b>0.05</b>  | <b>0.05</b>     | <b>0.05</b>      | 2.161       | <b>0.05</b>   |                                                                        |
| AICc   | <b>0.05</b>  | <b>0.05</b>     | 0.052            | 2.478       |               |                                                                        |
| AIC    | <b>0.05</b>  | <b>0.05</b>     | 0.053            | 1.378       |               |                                                                        |
| BIC    | <b>0.05</b>  | <b>0.05</b>     | 0.053            | 2.305       |               |                                                                        |
| CV.1se | <b>0.05</b>  | <b>0.05</b>     | <b>0.05</b>      | 84.513      | <b>0.05</b>   | $\text{sd}(\mu)/\sigma = 1$<br>$\rho = 0$<br><i>Oracle</i> : 0.102     |
| CV.min | 0.052        | 0.052           | 0.052            | 92.563      | 0.052         |                                                                        |
| AICc   | 0.051        | 0.115           | 0.170            | 83.668      |               |                                                                        |
| AIC    | 0.081        | 0.126           | 0.171            | 96.284      |               |                                                                        |
| BIC    | 0.081        | 0.126           | 0.171            | 96.246      |               |                                                                        |
| CV.1se | <b>0.05</b>  | <b>0.05</b>     | <b>0.05</b>      | 28.764      | <b>0.05</b>   | $\text{sd}(\mu)/\sigma = 1$<br>$\rho = 0.5$<br><i>Oracle</i> : 0.067   |
| CV.min | <b>0.05</b>  | <b>0.05</b>     | <b>0.05</b>      | 30.846      | <b>0.05</b>   |                                                                        |
| AICc   | <b>0.05</b>  | 0.057           | 0.091            | 28.843      |               |                                                                        |
| AIC    | 0.061        | 0.074           | 0.091            | 32.569      |               |                                                                        |
| BIC    | 0.061        | 0.074           | 0.091            | 32.544      |               |                                                                        |
| CV.1se | <b>0.05</b>  | <b>0.05</b>     | <b>0.05</b>      | 5.390       | <b>0.05</b>   | $\text{sd}(\mu)/\sigma = 1$<br>$\rho = 0.9$<br><i>Oracle</i> : 0.059   |
| CV.min | <b>0.05</b>  | <b>0.05</b>     | <b>0.05</b>      | 4.976       | <b>0.05</b>   |                                                                        |
| AICc   | <b>0.05</b>  | <b>0.05</b>     | 0.059            | 5.058       |               |                                                                        |
| AIC    | 0.051        | 0.054           | 0.059            | 5.416       |               |                                                                        |
| BIC    | 0.051        | 0.054           | 0.059            | 5.438       |               |                                                                        |
| CV.1se | <b>0.052</b> | <b>0.052</b>    | <b>0.052</b>     | 308.050     | <b>0.052</b>  | $\text{sd}(\mu)/\sigma = 0.5$<br>$\rho = 0$<br><i>Oracle</i> : 0.077   |
| CV.min | 0.056        | 0.056           | 0.056            | 365.357     | 0.058         |                                                                        |
| AICc   | 0.055        | 0.279           | 0.393            | 267.155     |               |                                                                        |
| AIC    | 0.151        | 0.290           | 0.394            | 385.780     |               |                                                                        |
| BIC    | 0.151        | 0.290           | 0.394            | 385.622     |               |                                                                        |
| CV.1se | <b>0.05</b>  | <b>0.05</b>     | <b>0.05</b>      | 99.072      | <b>0.05</b>   | $\text{sd}(\mu)/\sigma = 0.5$<br>$\rho = 0.5$<br><i>Oracle</i> : 0.061 |
| CV.min | 0.051        | 0.051           | 0.051            | 119.313     | 0.052         |                                                                        |
| AICc   | 0.051        | 0.107           | 0.166            | 90.468      |               |                                                                        |
| AIC    | 0.086        | 0.126           | 0.167            | 130.265     |               |                                                                        |
| BIC    | 0.086        | 0.126           | 0.167            | 130.194     |               |                                                                        |
| CV.1se | <b>0.05</b>  | <b>0.05</b>     | <b>0.05</b>      | 14.671      | <b>0.05</b>   | $\text{sd}(\mu)/\sigma = 0.5$<br>$\rho = 0.9$<br><i>Oracle</i> : 0.059 |
| CV.min | <b>0.05</b>  | <b>0.05</b>     | <b>0.05</b>      | 16.235      | <b>0.05</b>   |                                                                        |
| AICc   | <b>0.05</b>  | <b>0.05</b>     | 0.078            | 15.168      |               |                                                                        |
| AIC    | 0.061        | 0.068           | 0.079            | 21.678      |               |                                                                        |
| BIC    | 0.061        | 0.068           | 0.079            | 18.951      |               |                                                                        |

Table 59: Estimation MSE for n=100, continuous design, dense covariates, and decay 200.

|        | lasso        | GL $\gamma = 1$ | GL $\gamma = 10$ | marginal AL | sparsenet MCP |                                                                        |
|--------|--------------|-----------------|------------------|-------------|---------------|------------------------------------------------------------------------|
| CV.lse | <b>0.1</b>   | 0.101           | 0.101            | 55.658      | 0.101         | $\text{sd}(\mu)/\sigma = 2$<br>$\rho = 0$<br><i>Oracle</i> : 1253.554  |
| CV.min | 0.103        | 0.103           | 0.102            | 48.708      | 0.104         |                                                                        |
| AICc   | 0.101        | 0.178           | 0.240            | 74.225      |               |                                                                        |
| AIC    | 0.131        | 0.187           | 0.240            | 48.499      |               |                                                                        |
| BIC    | 0.131        | 0.187           | 0.240            | 48.485      |               |                                                                        |
| CV.lse | <b>0.1</b>   | <b>0.1</b>      | <b>0.1</b>       | 21.955      | <b>0.1</b>    | $\text{sd}(\mu)/\sigma = 2$<br>$\rho = 0.5$<br><i>Oracle</i> : 708.345 |
| CV.min | <b>0.1</b>   | <b>0.1</b>      | <b>0.1</b>       | 17.187      | <b>0.1</b>    |                                                                        |
| AICc   | <b>0.1</b>   | 0.111           | 0.148            | 26.781      |               |                                                                        |
| AIC    | 0.111        | 0.127           | 0.148            | 16.350      |               |                                                                        |
| BIC    | 0.111        | 0.127           | 0.148            | 16.344      |               |                                                                        |
| CV.lse | <b>0.1</b>   | <b>0.1</b>      | <b>0.1</b>       | 5.936       | <b>0.1</b>    | $\text{sd}(\mu)/\sigma = 2$<br>$\rho = 0.9$<br><i>Oracle</i> : 601.732 |
| CV.min | <b>0.1</b>   | <b>0.1</b>      | <b>0.1</b>       | 4.261       | <b>0.1</b>    |                                                                        |
| AICc   | <b>0.1</b>   | <b>0.1</b>      | 0.109            | 4.934       |               |                                                                        |
| AIC    | <b>0.1</b>   | 0.105           | 0.110            | 2.671       |               |                                                                        |
| BIC    | <b>0.1</b>   | 0.105           | 0.110            | 4.183       |               |                                                                        |
| CV.lse | <b>0.101</b> | 0.102           | 0.102            | 170.765     | <b>0.101</b>  | $\text{sd}(\mu)/\sigma = 1$<br>$\rho = 0$<br><i>Oracle</i> : 21.631    |
| CV.min | 0.105        | 0.104           | 0.104            | 186.404     | 0.107         |                                                                        |
| AICc   | 0.103        | 0.261           | 0.355            | 168.740     |               |                                                                        |
| AIC    | 0.166        | 0.269           | 0.356            | 193.942     |               |                                                                        |
| BIC    | 0.166        | 0.269           | 0.356            | 193.872     |               |                                                                        |
| CV.lse | <b>0.1</b>   | <b>0.1</b>      | <b>0.1</b>       | 57.518      | <b>0.1</b>    | $\text{sd}(\mu)/\sigma = 1$<br>$\rho = 0.5$<br><i>Oracle</i> : 13.382  |
| CV.min | 0.101        | 0.101           | 0.101            | 61.288      | 0.101         |                                                                        |
| AICc   | <b>0.1</b>   | 0.135           | 0.186            | 57.517      |               |                                                                        |
| AIC    | 0.123        | 0.153           | 0.186            | 64.989      |               |                                                                        |
| BIC    | 0.123        | 0.153           | 0.186            | 64.960      |               |                                                                        |
| CV.lse | <b>0.1</b>   | <b>0.1</b>      | <b>0.1</b>       | 10.467      | <b>0.1</b>    | $\text{sd}(\mu)/\sigma = 1$<br>$\rho = 0.9$<br><i>Oracle</i> : 13.438  |
| CV.min | <b>0.1</b>   | <b>0.1</b>      | <b>0.1</b>       | 9.667       | <b>0.1</b>    |                                                                        |
| AICc   | <b>0.1</b>   | <b>0.1</b>      | 0.119            | 9.840       |               |                                                                        |
| AIC    | 0.106        | 0.111           | 0.119            | 10.478      |               |                                                                        |
| BIC    | 0.106        | 0.111           | 0.119            | 10.572      |               |                                                                        |
| CV.lse | <b>0.104</b> | 0.105           | 0.105            | 621.359     | <b>0.104</b>  | $\text{sd}(\mu)/\sigma = 0.5$<br>$\rho = 0$<br><i>Oracle</i> : 0.153   |
| CV.min | 0.113        | 0.110           | 0.112            | 736.801     | 0.117         |                                                                        |
| AICc   | 0.112        | 0.608           | 0.803            | 536.105     |               |                                                                        |
| AIC    | 0.304        | 0.620           | 0.808            | 776.534     |               |                                                                        |
| BIC    | 0.304        | 0.620           | 0.808            | 776.223     |               |                                                                        |
| CV.lse | <b>0.101</b> | <b>0.101</b>    | <b>0.101</b>     | 197.909     | <b>0.101</b>  | $\text{sd}(\mu)/\sigma = 0.5$<br>$\rho = 0.5$<br><i>Oracle</i> : 0.124 |
| CV.min | 0.103        | 0.103           | 0.103            | 237.902     | 0.104         |                                                                        |
| AICc   | 0.103        | 0.251           | 0.344            | 181.025     |               |                                                                        |
| AIC    | 0.173        | 0.265           | 0.345            | 260.223     |               |                                                                        |
| BIC    | 0.173        | 0.265           | 0.345            | 260.073     |               |                                                                        |
| CV.lse | <b>0.1</b>   | <b>0.1</b>      | <b>0.1</b>       | 28.220      | <b>0.1</b>    | $\text{sd}(\mu)/\sigma = 0.5$<br>$\rho = 0.9$<br><i>Oracle</i> : 0.120 |
| CV.min | <b>0.1</b>   | <b>0.1</b>      | <b>0.1</b>       | 31.225      | <b>0.1</b>    |                                                                        |
| AICc   | <b>0.1</b>   | 0.101           | 0.158            | 29.239      |               |                                                                        |
| AIC    | 0.121        | 0.139           | 0.159            | 41.667      |               |                                                                        |
| BIC    | 0.121        | 0.139           | 0.159            | 36.591      |               |                                                                        |

Table 60: Estimation MSE for n=100, binary design, sparse covariates, and decay 10.

|        | lasso    | GL $\gamma = 1$ | GL $\gamma = 10$ | marginal AL | sparsenet MCP |                                                                      |
|--------|----------|-----------------|------------------|-------------|---------------|----------------------------------------------------------------------|
| CV.lse | <b>0</b> | <b>0</b>        | <b>0</b>         | 0.403       | <b>0</b>      | sd( $\mu$ )/ $\sigma = 2$<br>$\rho = 0$<br><i>Oracle</i> : 0.000     |
| CV.min | <b>0</b> | <b>0</b>        | <b>0</b>         | 0.410       | <b>0</b>      |                                                                      |
| AICc   | <b>0</b> | <b>0</b>        | <b>0</b>         | 0.404       |               |                                                                      |
| AIC    | <b>0</b> | <b>0</b>        | <b>0</b>         | 0.441       |               |                                                                      |
| BIC    | <b>0</b> | <b>0</b>        | <b>0</b>         | 0.438       |               |                                                                      |
| CV.lse | <b>0</b> | <b>0</b>        | <b>0</b>         | 0.375       | <b>0</b>      | sd( $\mu$ )/ $\sigma = 2$<br>$\rho = 0.5$<br><i>Oracle</i> : 0.000   |
| CV.min | <b>0</b> | <b>0</b>        | <b>0</b>         | 0.376       | <b>0</b>      |                                                                      |
| AICc   | <b>0</b> | <b>0</b>        | <b>0</b>         | 0.385       |               |                                                                      |
| AIC    | <b>0</b> | <b>0</b>        | <b>0</b>         | 0.398       |               |                                                                      |
| BIC    | <b>0</b> | <b>0</b>        | <b>0</b>         | 0.401       |               |                                                                      |
| CV.lse | <b>0</b> | <b>0</b>        | <b>0</b>         | 0.364       | <b>0</b>      | sd( $\mu$ )/ $\sigma = 2$<br>$\rho = 0.9$<br><i>Oracle</i> : 0.000   |
| CV.min | <b>0</b> | <b>0</b>        | <b>0</b>         | 0.359       | <b>0</b>      |                                                                      |
| AICc   | <b>0</b> | <b>0</b>        | <b>0</b>         | 0.377       |               |                                                                      |
| AIC    | <b>0</b> | <b>0</b>        | <b>0</b>         | 0.379       |               |                                                                      |
| BIC    | <b>0</b> | <b>0</b>        | <b>0</b>         | 0.384       |               |                                                                      |
| CV.lse | <b>0</b> | <b>0</b>        | <b>0</b>         | 1.524       | <b>0</b>      | sd( $\mu$ )/ $\sigma = 1$<br>$\rho = 0$<br><i>Oracle</i> : 0.000     |
| CV.min | <b>0</b> | <b>0</b>        | 0.001            | 1.742       | <b>0</b>      |                                                                      |
| AICc   | <b>0</b> | 0.001           | 0.010            | 1.450       |               |                                                                      |
| AIC    | 0.004    | 0.007           | 0.010            | 1.860       |               |                                                                      |
| BIC    | 0.004    | 0.007           | 0.010            | 1.855       |               |                                                                      |
| CV.lse | <b>0</b> | <b>0</b>        | <b>0</b>         | 1.389       | <b>0</b>      | sd( $\mu$ )/ $\sigma = 1$<br>$\rho = 0.5$<br><i>Oracle</i> : 0.000   |
| CV.min | <b>0</b> | <b>0</b>        | <b>0</b>         | 1.572       | <b>0</b>      |                                                                      |
| AICc   | <b>0</b> | <b>0</b>        | 0.010            | 1.323       |               |                                                                      |
| AIC    | 0.004    | 0.007           | 0.010            | 1.663       |               |                                                                      |
| BIC    | 0.004    | 0.007           | 0.010            | 1.660       |               |                                                                      |
| CV.lse | <b>0</b> | <b>0</b>        | <b>0</b>         | 1.316       | <b>0</b>      | sd( $\mu$ )/ $\sigma = 1$<br>$\rho = 0.9$<br><i>Oracle</i> : 0.000   |
| CV.min | <b>0</b> | <b>0</b>        | <b>0</b>         | 1.479       | <b>0</b>      |                                                                      |
| AICc   | <b>0</b> | <b>0</b>        | 0.010            | 1.265       |               |                                                                      |
| AIC    | 0.003    | 0.006           | 0.010            | 1.579       |               |                                                                      |
| BIC    | 0.003    | 0.006           | 0.010            | 1.576       |               |                                                                      |
| CV.lse | <b>0</b> | <b>0</b>        | <b>0</b>         | 5.985       | <b>0</b>      | sd( $\mu$ )/ $\sigma = 0.5$<br>$\rho = 0$<br><i>Oracle</i> : 0.000   |
| CV.min | 0.001    | 0.001           | 0.001            | 7.110       | 0.002         |                                                                      |
| AICc   | 0.001    | 0.010           | 0.030            | 5.194       |               |                                                                      |
| AIC    | 0.012    | 0.019           | 0.031            | 7.571       |               |                                                                      |
| BIC    | 0.012    | 0.019           | 0.031            | 7.567       |               |                                                                      |
| CV.lse | <b>0</b> | <b>0</b>        | <b>0</b>         | 5.375       | <b>0</b>      | sd( $\mu$ )/ $\sigma = 0.5$<br>$\rho = 0.5$<br><i>Oracle</i> : 0.000 |
| CV.min | 0.001    | 0.001           | 0.001            | 6.395       | 0.001         |                                                                      |
| AICc   | 0.001    | 0.009           | 0.027            | 4.662       |               |                                                                      |
| AIC    | 0.011    | 0.017           | 0.027            | 6.772       |               |                                                                      |
| BIC    | 0.011    | 0.017           | 0.027            | 6.765       |               |                                                                      |
| CV.lse | <b>0</b> | <b>0</b>        | <b>0</b>         | 5.029       | <b>0</b>      | sd( $\mu$ )/ $\sigma = 0.5$<br>$\rho = 0.9$<br><i>Oracle</i> : 0.000 |
| CV.min | 0.001    | 0.001           | 0.001            | 6.006       | 0.001         |                                                                      |
| AICc   | 0.001    | 0.008           | 0.026            | 4.423       |               |                                                                      |
| AIC    | 0.011    | 0.016           | 0.026            | 6.407       |               |                                                                      |
| BIC    | 0.011    | 0.016           | 0.026            | 6.399       |               |                                                                      |

Table 61: Estimation MSE for n=100, binary design, sparse covariates, and decay 50.

|        | lasso        | GL $\gamma = 1$ | GL $\gamma = 10$ | marginal AL | sparsenet MCP |                                                                        |
|--------|--------------|-----------------|------------------|-------------|---------------|------------------------------------------------------------------------|
| CV.lse | 0.005        | 0.004           | 0.008            | 0.841       | 0.003         | $\text{sd}(\mu)/\sigma = 2$<br>$\rho = 0$<br><i>Oracle</i> : 0.000     |
| CV.min | <b>0.001</b> | <b>0.001</b>    | 0.006            | 0.863       | <b>0.001</b>  |                                                                        |
| AICc   | 0.002        | <b>0.001</b>    | 0.003            | 0.862       |               |                                                                        |
| AIC    | 0.002        | 0.002           | 0.003            | 0.927       |               |                                                                        |
| BIC    | 0.002        | 0.002           | 0.003            | 0.922       |               |                                                                        |
| CV.lse | 0.007        | 0.006           | 0.009            | 0.790       | 0.005         | $\text{sd}(\mu)/\sigma = 2$<br>$\rho = 0.5$<br><i>Oracle</i> : 0.000   |
| CV.min | 0.003        | 0.002           | 0.007            | 0.793       | 0.002         |                                                                        |
| AICc   | 0.004        | <b>0.001</b>    | 0.003            | 0.827       |               |                                                                        |
| AIC    | 0.003        | 0.002           | 0.003            | 0.837       |               |                                                                        |
| BIC    | 0.003        | 0.002           | 0.003            | 0.836       |               |                                                                        |
| CV.lse | 0.008        | 0.006           | 0.009            | 0.762       | 0.005         | $\text{sd}(\mu)/\sigma = 2$<br>$\rho = 0.9$<br><i>Oracle</i> : 0.000   |
| CV.min | 0.003        | 0.003           | 0.007            | 0.755       | 0.003         |                                                                        |
| AICc   | 0.005        | <b>0.002</b>    | 0.004            | 0.815       |               |                                                                        |
| AIC    | 0.003        | <b>0.002</b>    | 0.004            | 0.791       |               |                                                                        |
| BIC    | 0.003        | <b>0.002</b>    | 0.004            | 0.791       |               |                                                                        |
| CV.lse | <b>0.01</b>  | <b>0.01</b>     | <b>0.01</b>      | 3.217       | <b>0.01</b>   | $\text{sd}(\mu)/\sigma = 1$<br>$\rho = 0$<br><i>Oracle</i> : 0.000     |
| CV.min | <b>0.01</b>  | <b>0.01</b>     | <b>0.01</b>      | 3.664       | <b>0.01</b>   |                                                                        |
| AICc   | <b>0.01</b>  | 0.011           | 0.023            | 3.088       |               |                                                                        |
| AIC    | 0.011        | 0.014           | 0.023            | 3.868       |               |                                                                        |
| BIC    | 0.011        | 0.014           | 0.023            | 3.862       |               |                                                                        |
| CV.lse | <b>0.01</b>  | <b>0.01</b>     | <b>0.01</b>      | 2.928       | <b>0.01</b>   | $\text{sd}(\mu)/\sigma = 1$<br>$\rho = 0.5$<br><i>Oracle</i> : 0.000   |
| CV.min | <b>0.01</b>  | <b>0.01</b>     | <b>0.01</b>      | 3.296       | <b>0.01</b>   |                                                                        |
| AICc   | <b>0.01</b>  | <b>0.01</b>     | 0.021            | 2.816       |               |                                                                        |
| AIC    | 0.011        | 0.014           | 0.022            | 3.462       |               |                                                                        |
| BIC    | 0.011        | 0.014           | 0.022            | 3.459       |               |                                                                        |
| CV.lse | <b>0.01</b>  | <b>0.01</b>     | <b>0.01</b>      | 2.773       | <b>0.01</b>   | $\text{sd}(\mu)/\sigma = 1$<br>$\rho = 0.9$<br><i>Oracle</i> : 0.000   |
| CV.min | <b>0.01</b>  | <b>0.01</b>     | <b>0.01</b>      | 3.084       | <b>0.01</b>   |                                                                        |
| AICc   | <b>0.01</b>  | <b>0.01</b>     | 0.021            | 2.682       |               |                                                                        |
| AIC    | 0.011        | 0.013           | 0.021            | 3.265       |               |                                                                        |
| BIC    | 0.011        | 0.013           | 0.021            | 3.261       |               |                                                                        |
| CV.lse | <b>0.01</b>  | <b>0.01</b>     | <b>0.01</b>      | 12.422      | <b>0.01</b>   | $\text{sd}(\mu)/\sigma = 0.5$<br>$\rho = 0$<br><i>Oracle</i> : 0.003   |
| CV.min | <b>0.01</b>  | <b>0.01</b>     | 0.011            | 14.796      | 0.011         |                                                                        |
| AICc   | <b>0.01</b>  | 0.036           | 0.068            | 10.768      |               |                                                                        |
| AIC    | 0.027        | 0.044           | 0.068            | 15.664      |               |                                                                        |
| BIC    | 0.027        | 0.044           | 0.068            | 15.651      |               |                                                                        |
| CV.lse | <b>0.01</b>  | <b>0.01</b>     | <b>0.01</b>      | 11.124      | <b>0.01</b>   | $\text{sd}(\mu)/\sigma = 0.5$<br>$\rho = 0.5$<br><i>Oracle</i> : 0.003 |
| CV.min | <b>0.01</b>  | <b>0.01</b>     | <b>0.01</b>      | 13.209      | 0.011         |                                                                        |
| AICc   | <b>0.01</b>  | 0.032           | 0.060            | 9.630       |               |                                                                        |
| AIC    | 0.025        | 0.039           | 0.060            | 13.966      |               |                                                                        |
| BIC    | 0.025        | 0.039           | 0.060            | 13.954      |               |                                                                        |
| CV.lse | <b>0.01</b>  | <b>0.01</b>     | <b>0.01</b>      | 10.449      | <b>0.01</b>   | $\text{sd}(\mu)/\sigma = 0.5$<br>$\rho = 0.9$<br><i>Oracle</i> : 0.002 |
| CV.min | <b>0.01</b>  | <b>0.01</b>     | <b>0.01</b>      | 12.416      | <b>0.01</b>   |                                                                        |
| AICc   | <b>0.01</b>  | 0.030           | 0.057            | 9.146       |               |                                                                        |
| AIC    | 0.025        | 0.038           | 0.057            | 13.205      |               |                                                                        |
| BIC    | 0.025        | 0.038           | 0.057            | 13.199      |               |                                                                        |

Table 62: Estimation MSE for n=100, binary design, sparse covariates, and decay 100.

|        | lasso       | GL $\gamma = 1$ | GL $\gamma = 10$ | marginal AL | sparsenet MCP |                                                                      |
|--------|-------------|-----------------|------------------|-------------|---------------|----------------------------------------------------------------------|
| CV.lse | 0.007       | 0.005           | 0.009            | 0.934       | 0.004         | sd( $\mu$ )/ $\sigma = 2$<br>$\rho = 0$<br><i>Oracle</i> : 0.000     |
| CV.min | 0.002       | 0.002           | 0.007            | 0.959       | 0.002         |                                                                      |
| AICc   | 0.003       | <b>0.001</b>    | 0.004            | 0.959       |               |                                                                      |
| AIC    | 0.003       | 0.002           | 0.004            | 1.031       |               |                                                                      |
| BIC    | 0.003       | 0.002           | 0.004            | 1.025       |               |                                                                      |
| CV.lse | 0.008       | 0.007           | 0.009            | 0.874       | 0.005         | sd( $\mu$ )/ $\sigma = 2$<br>$\rho = 0.5$<br><i>Oracle</i> : 0.000   |
| CV.min | 0.004       | 0.003           | 0.007            | 0.879       | 0.003         |                                                                      |
| AICc   | 0.005       | <b>0.002</b>    | 0.004            | 0.917       |               |                                                                      |
| AIC    | 0.004       | <b>0.002</b>    | 0.004            | 0.928       |               |                                                                      |
| BIC    | 0.004       | <b>0.002</b>    | 0.004            | 0.928       |               |                                                                      |
| CV.lse | 0.009       | 0.007           | 0.009            | 0.849       | 0.006         | sd( $\mu$ )/ $\sigma = 2$<br>$\rho = 0.9$<br><i>Oracle</i> : 0.000   |
| CV.min | 0.005       | 0.004           | 0.008            | 0.840       | 0.004         |                                                                      |
| AICc   | 0.006       | <b>0.002</b>    | 0.005            | 0.903       |               |                                                                      |
| AIC    | 0.005       | 0.003           | 0.005            | 0.881       |               |                                                                      |
| BIC    | 0.005       | 0.003           | 0.005            | 0.880       |               |                                                                      |
| CV.lse | <b>0.01</b> | <b>0.01</b>     | <b>0.01</b>      | 3.578       | <b>0.01</b>   | sd( $\mu$ )/ $\sigma = 1$<br>$\rho = 0$<br><i>Oracle</i> : 0.000     |
| CV.min | <b>0.01</b> | <b>0.01</b>     | <b>0.01</b>      | 4.070       | <b>0.01</b>   |                                                                      |
| AICc   | <b>0.01</b> | 0.012           | 0.025            | 3.438       |               |                                                                      |
| AIC    | 0.011       | 0.016           | 0.026            | 4.298       |               |                                                                      |
| BIC    | 0.011       | 0.016           | 0.026            | 4.294       |               |                                                                      |
| CV.lse | <b>0.01</b> | <b>0.01</b>     | <b>0.01</b>      | 3.253       | <b>0.01</b>   | sd( $\mu$ )/ $\sigma = 1$<br>$\rho = 0.5$<br><i>Oracle</i> : 0.000   |
| CV.min | <b>0.01</b> | <b>0.01</b>     | <b>0.01</b>      | 3.657       | <b>0.01</b>   |                                                                      |
| AICc   | <b>0.01</b> | 0.011           | 0.024            | 3.134       |               |                                                                      |
| AIC    | 0.011       | 0.016           | 0.024            | 3.843       |               |                                                                      |
| BIC    | 0.011       | 0.016           | 0.024            | 3.840       |               |                                                                      |
| CV.lse | <b>0.01</b> | <b>0.01</b>     | <b>0.01</b>      | 3.086       | <b>0.01</b>   | sd( $\mu$ )/ $\sigma = 1$<br>$\rho = 0.9$<br><i>Oracle</i> : 0.000   |
| CV.min | <b>0.01</b> | <b>0.01</b>     | <b>0.01</b>      | 3.431       | <b>0.01</b>   |                                                                      |
| AICc   | <b>0.01</b> | 0.011           | 0.023            | 2.981       |               |                                                                      |
| AIC    | 0.011       | 0.015           | 0.023            | 3.630       |               |                                                                      |
| BIC    | 0.011       | 0.015           | 0.023            | 3.626       |               |                                                                      |
| CV.lse | <b>0.01</b> | <b>0.01</b>     | <b>0.01</b>      | 13.819      | <b>0.01</b>   | sd( $\mu$ )/ $\sigma = 0.5$<br>$\rho = 0$<br><i>Oracle</i> : 0.004   |
| CV.min | <b>0.01</b> | 0.011           | 0.011            | 16.457      | 0.011         |                                                                      |
| AICc   | <b>0.01</b> | 0.042           | 0.075            | 11.988      |               |                                                                      |
| AIC    | 0.030       | 0.049           | 0.075            | 17.413      |               |                                                                      |
| BIC    | 0.030       | 0.049           | 0.075            | 17.404      |               |                                                                      |
| CV.lse | <b>0.01</b> | <b>0.01</b>     | <b>0.01</b>      | 12.374      | <b>0.01</b>   | sd( $\mu$ )/ $\sigma = 0.5$<br>$\rho = 0.5$<br><i>Oracle</i> : 0.003 |
| CV.min | <b>0.01</b> | <b>0.01</b>     | 0.011            | 14.684      | 0.011         |                                                                      |
| AICc   | <b>0.01</b> | 0.037           | 0.067            | 10.713      |               |                                                                      |
| AIC    | 0.027       | 0.044           | 0.067            | 15.531      |               |                                                                      |
| BIC    | 0.027       | 0.044           | 0.067            | 15.519      |               |                                                                      |
| CV.lse | <b>0.01</b> | <b>0.01</b>     | <b>0.01</b>      | 11.623      | <b>0.01</b>   | sd( $\mu$ )/ $\sigma = 0.5$<br>$\rho = 0.9$<br><i>Oracle</i> : 0.003 |
| CV.min | <b>0.01</b> | <b>0.01</b>     | 0.011            | 13.816      | 0.011         |                                                                      |
| AICc   | <b>0.01</b> | 0.035           | 0.064            | 10.184      |               |                                                                      |
| AIC    | 0.027       | 0.043           | 0.064            | 14.704      |               |                                                                      |
| BIC    | 0.027       | 0.043           | 0.064            | 14.697      |               |                                                                      |

Table 63: Estimation MSE for n=100, binary design, sparse covariates, and decay 200.

|        | lasso       | GL $\gamma = 1$ | GL $\gamma = 10$ | marginal AL | sparsenet MCP |                                                                      |
|--------|-------------|-----------------|------------------|-------------|---------------|----------------------------------------------------------------------|
| CV.lse | 0.007       | 0.006           | 0.009            | 0.985       | 0.004         | sd( $\mu$ )/ $\sigma = 2$<br>$\rho = 0$<br><i>Oracle</i> : 0.000     |
| CV.min | 0.003       | 0.002           | 0.007            | 1.011       | 0.002         |                                                                      |
| AICc   | 0.004       | <b>0.001</b>    | 0.004            | 1.011       |               |                                                                      |
| AIC    | 0.004       | 0.002           | 0.005            | 1.087       |               |                                                                      |
| BIC    | 0.004       | 0.002           | 0.005            | 1.081       |               |                                                                      |
| CV.lse | 0.008       | 0.007           | 0.009            | 0.925       | 0.005         | sd( $\mu$ )/ $\sigma = 2$<br>$\rho = 0.5$<br><i>Oracle</i> : 0.000   |
| CV.min | 0.004       | 0.003           | 0.007            | 0.931       | 0.003         |                                                                      |
| AICc   | 0.006       | <b>0.002</b>    | 0.004            | 0.968       |               |                                                                      |
| AIC    | 0.005       | <b>0.002</b>    | 0.004            | 0.982       |               |                                                                      |
| BIC    | 0.005       | <b>0.002</b>    | 0.004            | 0.982       |               |                                                                      |
| CV.lse | 0.009       | 0.007           | 0.010            | 0.892       | 0.006         | sd( $\mu$ )/ $\sigma = 2$<br>$\rho = 0.9$<br><i>Oracle</i> : 0.000   |
| CV.min | 0.005       | 0.004           | 0.008            | 0.885       | 0.004         |                                                                      |
| AICc   | 0.007       | <b>0.003</b>    | 0.005            | 0.952       |               |                                                                      |
| AIC    | 0.005       | <b>0.003</b>    | 0.005            | 0.928       |               |                                                                      |
| BIC    | 0.005       | <b>0.003</b>    | 0.005            | 0.928       |               |                                                                      |
| CV.lse | <b>0.01</b> | <b>0.01</b>     | <b>0.01</b>      | 3.769       | <b>0.01</b>   | sd( $\mu$ )/ $\sigma = 1$<br>$\rho = 0$<br><i>Oracle</i> : 0.000     |
| CV.min | <b>0.01</b> | <b>0.01</b>     | <b>0.01</b>      | 4.292       | <b>0.01</b>   |                                                                      |
| AICc   | <b>0.01</b> | 0.013           | 0.027            | 3.627       |               |                                                                      |
| AIC    | 0.012       | 0.018           | 0.027            | 4.532       |               |                                                                      |
| BIC    | 0.012       | 0.018           | 0.027            | 4.527       |               |                                                                      |
| CV.lse | <b>0.01</b> | <b>0.01</b>     | <b>0.01</b>      | 3.440       | <b>0.01</b>   | sd( $\mu$ )/ $\sigma = 1$<br>$\rho = 0.5$<br><i>Oracle</i> : 0.000   |
| CV.min | <b>0.01</b> | <b>0.01</b>     | <b>0.01</b>      | 3.871       | <b>0.01</b>   |                                                                      |
| AICc   | <b>0.01</b> | 0.012           | 0.025            | 3.309       |               |                                                                      |
| AIC    | 0.012       | 0.017           | 0.026            | 4.065       |               |                                                                      |
| BIC    | 0.012       | 0.017           | 0.026            | 4.062       |               |                                                                      |
| CV.lse | <b>0.01</b> | <b>0.01</b>     | <b>0.01</b>      | 3.262       | <b>0.01</b>   | sd( $\mu$ )/ $\sigma = 1$<br>$\rho = 0.9$<br><i>Oracle</i> : 0.000   |
| CV.min | <b>0.01</b> | <b>0.01</b>     | <b>0.01</b>      | 3.629       | <b>0.01</b>   |                                                                      |
| AICc   | <b>0.01</b> | 0.012           | 0.024            | 3.148       |               |                                                                      |
| AIC    | 0.012       | 0.016           | 0.024            | 3.837       |               |                                                                      |
| BIC    | 0.012       | 0.016           | 0.024            | 3.834       |               |                                                                      |
| CV.lse | <b>0.01</b> | <b>0.01</b>     | <b>0.01</b>      | 14.577      | <b>0.01</b>   | sd( $\mu$ )/ $\sigma = 0.5$<br>$\rho = 0$<br><i>Oracle</i> : 0.005   |
| CV.min | 0.011       | 0.011           | 0.011            | 17.364      | 0.011         |                                                                      |
| AICc   | <b>0.01</b> | 0.044           | 0.079            | 12.631      |               |                                                                      |
| AIC    | 0.032       | 0.052           | 0.080            | 18.385      |               |                                                                      |
| BIC    | 0.032       | 0.052           | 0.080            | 18.376      |               |                                                                      |
| CV.lse | <b>0.01</b> | <b>0.01</b>     | <b>0.01</b>      | 13.056      | <b>0.01</b>   | sd( $\mu$ )/ $\sigma = 0.5$<br>$\rho = 0.5$<br><i>Oracle</i> : 0.004 |
| CV.min | 0.011       | 0.011           | 0.011            | 15.485      | 0.011         |                                                                      |
| AICc   | <b>0.01</b> | 0.039           | 0.072            | 11.270      |               |                                                                      |
| AIC    | 0.029       | 0.046           | 0.072            | 16.380      |               |                                                                      |
| BIC    | 0.029       | 0.046           | 0.072            | 16.367      |               |                                                                      |
| CV.lse | <b>0.01</b> | <b>0.01</b>     | <b>0.01</b>      | 12.206      | <b>0.01</b>   | sd( $\mu$ )/ $\sigma = 0.5$<br>$\rho = 0.9$<br><i>Oracle</i> : 0.003 |
| CV.min | 0.011       | 0.011           | 0.011            | 14.533      | 0.011         |                                                                      |
| AICc   | <b>0.01</b> | 0.037           | 0.067            | 10.720      |               |                                                                      |
| AIC    | 0.029       | 0.045           | 0.068            | 15.447      |               |                                                                      |
| BIC    | 0.029       | 0.045           | 0.068            | 15.439      |               |                                                                      |

Table 64: Estimation MSE for n=100, continuous design, sparse covariates, and decay 10.

|        | lasso    | GL $\gamma = 1$ | GL $\gamma = 10$ | marginal AL | sparsenet MCP |                                                                      |
|--------|----------|-----------------|------------------|-------------|---------------|----------------------------------------------------------------------|
| CV.lse | <b>0</b> | <b>0</b>        | <b>0</b>         | 1.632       | <b>0</b>      | sd( $\mu$ )/ $\sigma = 2$<br>$\rho = 0$<br><i>Oracle</i> : 0.000     |
| CV.min | <b>0</b> | <b>0</b>        | <b>0</b>         | 1.640       | <b>0</b>      |                                                                      |
| AICc   | <b>0</b> | <b>0</b>        | <b>0</b>         | 1.632       |               |                                                                      |
| AIC    | <b>0</b> | <b>0</b>        | <b>0</b>         | 1.766       |               |                                                                      |
| BIC    | <b>0</b> | <b>0</b>        | <b>0</b>         | 1.768       |               |                                                                      |
| CV.lse | <b>0</b> | <b>0</b>        | <b>0</b>         | 0.921       | <b>0</b>      | sd( $\mu$ )/ $\sigma = 2$<br>$\rho = 0.5$<br><i>Oracle</i> : 0.000   |
| CV.min | <b>0</b> | <b>0</b>        | <b>0</b>         | 0.748       | <b>0</b>      |                                                                      |
| AICc   | <b>0</b> | <b>0</b>        | <b>0</b>         | 0.999       |               |                                                                      |
| AIC    | <b>0</b> | <b>0</b>        | <b>0</b>         | 0.728       |               |                                                                      |
| BIC    | <b>0</b> | <b>0</b>        | <b>0</b>         | 0.849       |               |                                                                      |
| CV.lse | <b>0</b> | <b>0</b>        | <b>0</b>         | 0.261       | <b>0</b>      | sd( $\mu$ )/ $\sigma = 2$<br>$\rho = 0.9$<br><i>Oracle</i> : 0.000   |
| CV.min | <b>0</b> | <b>0</b>        | <b>0</b>         | 0.199       | <b>0</b>      |                                                                      |
| AICc   | <b>0</b> | <b>0</b>        | <b>0</b>         | 0.222       |               |                                                                      |
| AIC    | <b>0</b> | <b>0</b>        | <b>0</b>         | 0.177       |               |                                                                      |
| BIC    | <b>0</b> | <b>0</b>        | <b>0</b>         | 0.297       |               |                                                                      |
| CV.lse | <b>0</b> | <b>0</b>        | <b>0</b>         | 6.095       | <b>0</b>      | sd( $\mu$ )/ $\sigma = 1$<br>$\rho = 0$<br><i>Oracle</i> : 0.000     |
| CV.min | <b>0</b> | <b>0</b>        | <b>0</b>         | 6.960       | <b>0</b>      |                                                                      |
| AICc   | <b>0</b> | <b>0</b>        | 0.010            | 5.824       |               |                                                                      |
| AIC    | 0.002    | 0.006           | 0.010            | 7.446       |               |                                                                      |
| BIC    | 0.002    | 0.006           | 0.010            | 7.412       |               |                                                                      |
| CV.lse | <b>0</b> | <b>0</b>        | <b>0</b>         | 2.531       | <b>0</b>      | sd( $\mu$ )/ $\sigma = 1$<br>$\rho = 0.5$<br><i>Oracle</i> : 0.000   |
| CV.min | <b>0</b> | <b>0</b>        | <b>0</b>         | 2.746       | <b>0</b>      |                                                                      |
| AICc   | <b>0</b> | <b>0</b>        | 0.007            | 2.467       |               |                                                                      |
| AIC    | 0.001    | 0.003           | 0.007            | 2.933       |               |                                                                      |
| BIC    | 0.001    | 0.003           | 0.007            | 2.920       |               |                                                                      |
| CV.lse | <b>0</b> | <b>0</b>        | <b>0</b>         | 0.646       | <b>0</b>      | sd( $\mu$ )/ $\sigma = 1$<br>$\rho = 0.9$<br><i>Oracle</i> : 0.000   |
| CV.min | <b>0</b> | <b>0</b>        | <b>0</b>         | 0.621       | <b>0</b>      |                                                                      |
| AICc   | <b>0</b> | <b>0</b>        | <b>0</b>         | 0.611       |               |                                                                      |
| AIC    | <b>0</b> | <b>0</b>        | <b>0</b>         | 0.712       |               |                                                                      |
| BIC    | <b>0</b> | <b>0</b>        | <b>0</b>         | 0.639       |               |                                                                      |
| CV.lse | <b>0</b> | <b>0</b>        | <b>0</b>         | 23.828      | <b>0</b>      | sd( $\mu$ )/ $\sigma = 0.5$<br>$\rho = 0$<br><i>Oracle</i> : 0.000   |
| CV.min | 0.001    | 0.001           | 0.001            | 28.516      | 0.002         |                                                                      |
| AICc   | 0.001    | 0.002           | 0.026            | 20.704      |               |                                                                      |
| AIC    | 0.010    | 0.016           | 0.026            | 30.325      |               |                                                                      |
| BIC    | 0.010    | 0.016           | 0.026            | 30.303      |               |                                                                      |
| CV.lse | <b>0</b> | <b>0</b>        | <b>0</b>         | 9.094       | <b>0</b>      | sd( $\mu$ )/ $\sigma = 0.5$<br>$\rho = 0.5$<br><i>Oracle</i> : 0.000 |
| CV.min | <b>0</b> | <b>0</b>        | <b>0</b>         | 10.848      | 0.001         |                                                                      |
| AICc   | <b>0</b> | <b>0</b>        | 0.011            | 8.188       |               |                                                                      |
| AIC    | 0.010    | 0.010           | 0.011            | 11.884      |               |                                                                      |
| BIC    | 0.010    | 0.010           | 0.011            | 11.864      |               |                                                                      |
| CV.lse | <b>0</b> | <b>0</b>        | <b>0</b>         | 2.028       | <b>0</b>      | sd( $\mu$ )/ $\sigma = 0.5$<br>$\rho = 0.9$<br><i>Oracle</i> : 0.000 |
| CV.min | <b>0</b> | <b>0</b>        | <b>0</b>         | 2.238       | <b>0</b>      |                                                                      |
| AICc   | <b>0</b> | <b>0</b>        | 0.006            | 2.079       |               |                                                                      |
| AIC    | 0.006    | 0.009           | 0.010            | 3.023       |               |                                                                      |
| BIC    | 0.006    | 0.009           | 0.010            | 2.431       |               |                                                                      |



Table 65: Estimation MSE for n=100, continuous design, sparse covariates, and decay 50.

|        | lasso        | GL $\gamma = 1$ | GL $\gamma = 10$ | marginal AL | sparsenet MCP |                                                                        |
|--------|--------------|-----------------|------------------|-------------|---------------|------------------------------------------------------------------------|
| CV.lse | 0.005        | 0.004           | 0.008            | 3.384       | 0.003         | $\text{sd}(\mu)/\sigma = 2$<br>$\rho = 0$<br><i>Oracle</i> : 0.000     |
| CV.min | <b>0.001</b> | <b>0.001</b>    | 0.005            | 3.444       | <b>0.001</b>  |                                                                        |
| AICc   | 0.002        | <b>0.001</b>    | 0.003            | 3.455       |               |                                                                        |
| AIC    | <b>0.001</b> | <b>0.001</b>    | 0.003            | 3.711       |               |                                                                        |
| BIC    | <b>0.001</b> | <b>0.001</b>    | 0.003            | 3.701       |               |                                                                        |
| CV.lse | 0.010        | 0.010           | 0.010            | 1.866       | 0.010         | $\text{sd}(\mu)/\sigma = 2$<br>$\rho = 0.5$<br><i>Oracle</i> : 0.000   |
| CV.min | 0.010        | 0.010           | 0.010            | 1.519       | 0.010         |                                                                        |
| AICc   | 0.010        | 0.010           | <b>0.009</b>     | 2.116       |               |                                                                        |
| AIC    | 0.010        | 0.010           | <b>0.009</b>     | 1.476       |               |                                                                        |
| BIC    | 0.010        | 0.010           | <b>0.009</b>     | 1.505       |               |                                                                        |
| CV.lse | <b>0.01</b>  | <b>0.01</b>     | <b>0.01</b>      | 0.552       | <b>0.01</b>   | $\text{sd}(\mu)/\sigma = 2$<br>$\rho = 0.9$<br><i>Oracle</i> : 0.000   |
| CV.min | <b>0.01</b>  | <b>0.01</b>     | <b>0.01</b>      | 0.412       | <b>0.01</b>   |                                                                        |
| AICc   | <b>0.01</b>  | <b>0.01</b>     | <b>0.01</b>      | 0.468       |               |                                                                        |
| AIC    | <b>0.01</b>  | <b>0.01</b>     | <b>0.01</b>      | 0.326       |               |                                                                        |
| BIC    | <b>0.01</b>  | <b>0.01</b>     | <b>0.01</b>      | 0.546       |               |                                                                        |
| CV.lse | <b>0.01</b>  | <b>0.01</b>     | <b>0.01</b>      | 12.877      | <b>0.01</b>   | $\text{sd}(\mu)/\sigma = 1$<br>$\rho = 0$<br><i>Oracle</i> : 0.000     |
| CV.min | <b>0.01</b>  | <b>0.01</b>     | <b>0.01</b>      | 14.608      | <b>0.01</b>   |                                                                        |
| AICc   | <b>0.01</b>  | <b>0.01</b>     | 0.019            | 12.408      |               |                                                                        |
| AIC    | <b>0.01</b>  | 0.012           | 0.020            | 15.535      |               |                                                                        |
| BIC    | <b>0.01</b>  | 0.012           | 0.020            | 15.515      |               |                                                                        |
| CV.lse | <b>0.01</b>  | <b>0.01</b>     | <b>0.01</b>      | 5.166       | <b>0.01</b>   | $\text{sd}(\mu)/\sigma = 1$<br>$\rho = 0.5$<br><i>Oracle</i> : 0.000   |
| CV.min | <b>0.01</b>  | <b>0.01</b>     | <b>0.01</b>      | 5.572       | <b>0.01</b>   |                                                                        |
| AICc   | <b>0.01</b>  | <b>0.01</b>     | 0.011            | 5.099       |               |                                                                        |
| AIC    | <b>0.01</b>  | <b>0.01</b>     | 0.012            | 5.931       |               |                                                                        |
| BIC    | <b>0.01</b>  | <b>0.01</b>     | 0.012            | 5.921       |               |                                                                        |
| CV.lse | <b>0.01</b>  | <b>0.01</b>     | <b>0.01</b>      | 1.203       | <b>0.01</b>   | $\text{sd}(\mu)/\sigma = 1$<br>$\rho = 0.9$<br><i>Oracle</i> : 0.000   |
| CV.min | <b>0.01</b>  | <b>0.01</b>     | <b>0.01</b>      | 1.131       | <b>0.01</b>   |                                                                        |
| AICc   | <b>0.01</b>  | <b>0.01</b>     | <b>0.01</b>      | 1.129       |               |                                                                        |
| AIC    | <b>0.01</b>  | <b>0.01</b>     | <b>0.01</b>      | 1.298       |               |                                                                        |
| BIC    | <b>0.01</b>  | <b>0.01</b>     | <b>0.01</b>      | 1.251       |               |                                                                        |
| CV.lse | <b>0.01</b>  | <b>0.01</b>     | <b>0.01</b>      | 49.772      | <b>0.01</b>   | $\text{sd}(\mu)/\sigma = 0.5$<br>$\rho = 0$<br><i>Oracle</i> : 0.003   |
| CV.min | <b>0.01</b>  | <b>0.01</b>     | 0.011            | 59.586      | <b>0.01</b>   |                                                                        |
| AICc   | <b>0.01</b>  | 0.022           | 0.057            | 43.221      |               |                                                                        |
| AIC    | 0.023        | 0.038           | 0.057            | 62.969      |               |                                                                        |
| BIC    | 0.023        | 0.038           | 0.057            | 62.940      |               |                                                                        |
| CV.lse | <b>0.01</b>  | <b>0.01</b>     | <b>0.01</b>      | 18.349      | <b>0.01</b>   | $\text{sd}(\mu)/\sigma = 0.5$<br>$\rho = 0.5$<br><i>Oracle</i> : 0.000 |
| CV.min | <b>0.01</b>  | <b>0.01</b>     | <b>0.01</b>      | 21.851      | <b>0.01</b>   |                                                                        |
| AICc   | <b>0.01</b>  | <b>0.01</b>     | 0.026            | 16.449      |               |                                                                        |
| AIC    | 0.013        | 0.020           | 0.027            | 23.839      |               |                                                                        |
| BIC    | 0.013        | 0.020           | 0.027            | 23.828      |               |                                                                        |
| CV.lse | <b>0.01</b>  | <b>0.01</b>     | <b>0.01</b>      | 3.579       | <b>0.01</b>   | $\text{sd}(\mu)/\sigma = 0.5$<br>$\rho = 0.9$<br><i>Oracle</i> : 0.001 |
| CV.min | <b>0.01</b>  | <b>0.01</b>     | <b>0.01</b>      | 3.949       | <b>0.01</b>   |                                                                        |
| AICc   | <b>0.01</b>  | <b>0.01</b>     | 0.012            | 3.663       |               |                                                                        |
| AIC    | <b>0.01</b>  | <b>0.01</b>     | 0.013            | 5.273       |               |                                                                        |
| BIC    | <b>0.01</b>  | <b>0.01</b>     | 0.013            | 4.563       |               |                                                                        |

Table 66: Estimation MSE for n=100, continuous design, sparse covariates, and decay 100.

|        | lasso       | GL $\gamma = 1$ | GL $\gamma = 10$ | marginal AL | sparsenet MCP |                                                                      |
|--------|-------------|-----------------|------------------|-------------|---------------|----------------------------------------------------------------------|
| CV.lse | 0.006       | 0.005           | 0.009            | 3.765       | 0.004         | sd( $\mu$ )/ $\sigma = 2$<br>$\rho = 0$<br><i>Oracle</i> : 0.000     |
| CV.min | 0.002       | 0.002           | 0.006            | 3.830       | <b>0.001</b>  |                                                                      |
| AICc   | 0.003       | 0.002           | 0.003            | 3.830       |               |                                                                      |
| AIC    | 0.002       | <b>0.001</b>    | 0.003            | 4.133       |               |                                                                      |
| BIC    | 0.002       | <b>0.001</b>    | 0.003            | 4.122       |               |                                                                      |
| CV.lse | <b>0.01</b> | <b>0.01</b>     | <b>0.01</b>      | 2.071       | <b>0.01</b>   | sd( $\mu$ )/ $\sigma = 2$<br>$\rho = 0.5$<br><i>Oracle</i> : 0.000   |
| CV.min | <b>0.01</b> | <b>0.01</b>     | <b>0.01</b>      | 1.685       | <b>0.01</b>   |                                                                      |
| AICc   | <b>0.01</b> | <b>0.01</b>     | <b>0.01</b>      | 2.342       |               |                                                                      |
| AIC    | <b>0.01</b> | <b>0.01</b>     | <b>0.01</b>      | 1.640       |               |                                                                      |
| BIC    | <b>0.01</b> | <b>0.01</b>     | <b>0.01</b>      | 1.680       |               |                                                                      |
| CV.lse | <b>0.01</b> | <b>0.01</b>     | <b>0.01</b>      | 0.612       | <b>0.01</b>   | sd( $\mu$ )/ $\sigma = 2$<br>$\rho = 0.9$<br><i>Oracle</i> : 0.000   |
| CV.min | <b>0.01</b> | <b>0.01</b>     | <b>0.01</b>      | 0.460       | <b>0.01</b>   |                                                                      |
| AICc   | <b>0.01</b> | <b>0.01</b>     | <b>0.01</b>      | 0.515       |               |                                                                      |
| AIC    | <b>0.01</b> | <b>0.01</b>     | <b>0.01</b>      | 0.361       |               |                                                                      |
| BIC    | <b>0.01</b> | <b>0.01</b>     | <b>0.01</b>      | 0.592       |               |                                                                      |
| CV.lse | <b>0.01</b> | <b>0.01</b>     | <b>0.01</b>      | 14.293      | <b>0.01</b>   | sd( $\mu$ )/ $\sigma = 1$<br>$\rho = 0$<br><i>Oracle</i> : 0.000     |
| CV.min | <b>0.01</b> | <b>0.01</b>     | <b>0.01</b>      | 16.209      | <b>0.01</b>   |                                                                      |
| AICc   | <b>0.01</b> | <b>0.01</b>     | 0.022            | 13.770      |               |                                                                      |
| AIC    | <b>0.01</b> | 0.014           | 0.022            | 17.237      |               |                                                                      |
| BIC    | <b>0.01</b> | 0.014           | 0.022            | 17.212      |               |                                                                      |
| CV.lse | <b>0.01</b> | <b>0.01</b>     | <b>0.01</b>      | 5.737       | <b>0.01</b>   | sd( $\mu$ )/ $\sigma = 1$<br>$\rho = 0.5$<br><i>Oracle</i> : 0.000   |
| CV.min | <b>0.01</b> | <b>0.01</b>     | <b>0.01</b>      | 6.183       | <b>0.01</b>   |                                                                      |
| AICc   | <b>0.01</b> | <b>0.01</b>     | 0.014            | 5.655       |               |                                                                      |
| AIC    | <b>0.01</b> | <b>0.01</b>     | 0.014            | 6.577       |               |                                                                      |
| BIC    | <b>0.01</b> | <b>0.01</b>     | 0.014            | 6.569       |               |                                                                      |
| CV.lse | <b>0.01</b> | <b>0.01</b>     | <b>0.01</b>      | 1.331       | <b>0.01</b>   | sd( $\mu$ )/ $\sigma = 1$<br>$\rho = 0.9$<br><i>Oracle</i> : 0.000   |
| CV.min | <b>0.01</b> | <b>0.01</b>     | <b>0.01</b>      | 1.250       | <b>0.01</b>   |                                                                      |
| AICc   | <b>0.01</b> | <b>0.01</b>     | <b>0.01</b>      | 1.251       |               |                                                                      |
| AIC    | <b>0.01</b> | <b>0.01</b>     | <b>0.01</b>      | 1.436       |               |                                                                      |
| BIC    | <b>0.01</b> | <b>0.01</b>     | <b>0.01</b>      | 1.397       |               |                                                                      |
| CV.lse | <b>0.01</b> | <b>0.01</b>     | <b>0.01</b>      | 55.351      | <b>0.01</b>   | sd( $\mu$ )/ $\sigma = 0.5$<br>$\rho = 0$<br><i>Oracle</i> : 0.003   |
| CV.min | <b>0.01</b> | 0.011           | 0.011            | 66.260      | 0.011         |                                                                      |
| AICc   | <b>0.01</b> | 0.025           | 0.064            | 48.089      |               |                                                                      |
| AIC    | 0.026       | 0.042           | 0.064            | 70.016      |               |                                                                      |
| BIC    | 0.026       | 0.042           | 0.064            | 69.985      |               |                                                                      |
| CV.lse | <b>0.01</b> | <b>0.01</b>     | <b>0.01</b>      | 20.360      | <b>0.01</b>   | sd( $\mu$ )/ $\sigma = 0.5$<br>$\rho = 0.5$<br><i>Oracle</i> : 0.001 |
| CV.min | <b>0.01</b> | <b>0.01</b>     | <b>0.01</b>      | 24.284      | <b>0.01</b>   |                                                                      |
| AICc   | <b>0.01</b> | 0.011           | 0.030            | 18.274      |               |                                                                      |
| AIC    | 0.017       | 0.021           | 0.030            | 26.493      |               |                                                                      |
| BIC    | 0.017       | 0.021           | 0.030            | 26.479      |               |                                                                      |
| CV.lse | <b>0.01</b> | <b>0.01</b>     | <b>0.01</b>      | 3.954       | <b>0.01</b>   | sd( $\mu$ )/ $\sigma = 0.5$<br>$\rho = 0.9$<br><i>Oracle</i> : 0.001 |
| CV.min | <b>0.01</b> | <b>0.01</b>     | <b>0.01</b>      | 4.363       | <b>0.01</b>   |                                                                      |
| AICc   | <b>0.01</b> | <b>0.01</b>     | 0.015            | 4.053       |               |                                                                      |
| AIC    | <b>0.01</b> | 0.011           | 0.016            | 5.825       |               |                                                                      |
| BIC    | <b>0.01</b> | 0.011           | 0.016            | 5.048       |               |                                                                      |

Table 67: Estimation MSE for n=100, continuous design, sparse covariates, and decay 200.

|        | lasso        | GL $\gamma = 1$ | GL $\gamma = 10$ | marginal AL | sparsenet MCP |                                                                      |
|--------|--------------|-----------------|------------------|-------------|---------------|----------------------------------------------------------------------|
| CV.lse | 0.007        | 0.005           | 0.009            | 3.972       | 0.004         | sd( $\mu$ )/ $\sigma = 2$<br>$\rho = 0$<br><i>Oracle</i> : 0.000     |
| CV.min | <b>0.002</b> | <b>0.002</b>    | 0.006            | 4.040       | <b>0.002</b>  |                                                                      |
| AICc   | 0.003        | <b>0.002</b>    | 0.003            | 4.047       |               |                                                                      |
| AIC    | 0.003        | <b>0.002</b>    | 0.003            | 4.364       |               |                                                                      |
| BIC    | 0.003        | <b>0.002</b>    | 0.003            | 4.352       |               |                                                                      |
| CV.lse | <b>0.01</b>  | <b>0.01</b>     | <b>0.01</b>      | 2.184       | <b>0.01</b>   | sd( $\mu$ )/ $\sigma = 2$<br>$\rho = 0.5$<br><i>Oracle</i> : 0.000   |
| CV.min | <b>0.01</b>  | <b>0.01</b>     | <b>0.01</b>      | 1.776       | <b>0.01</b>   |                                                                      |
| AICc   | <b>0.01</b>  | <b>0.01</b>     | <b>0.01</b>      | 2.469       |               |                                                                      |
| AIC    | <b>0.01</b>  | <b>0.01</b>     | <b>0.01</b>      | 1.731       |               |                                                                      |
| BIC    | <b>0.01</b>  | <b>0.01</b>     | <b>0.01</b>      | 1.784       |               |                                                                      |
| CV.lse | <b>0.01</b>  | <b>0.01</b>     | <b>0.01</b>      | 0.646       | <b>0.01</b>   | sd( $\mu$ )/ $\sigma = 2$<br>$\rho = 0.9$<br><i>Oracle</i> : 0.000   |
| CV.min | <b>0.01</b>  | <b>0.01</b>     | <b>0.01</b>      | 0.486       | <b>0.01</b>   |                                                                      |
| AICc   | <b>0.01</b>  | <b>0.01</b>     | <b>0.01</b>      | 0.544       |               |                                                                      |
| AIC    | <b>0.01</b>  | <b>0.01</b>     | <b>0.01</b>      | 0.381       |               |                                                                      |
| BIC    | <b>0.01</b>  | <b>0.01</b>     | <b>0.01</b>      | 0.617       |               |                                                                      |
| CV.lse | <b>0.01</b>  | <b>0.01</b>     | <b>0.01</b>      | 15.128      | <b>0.01</b>   | sd( $\mu$ )/ $\sigma = 1$<br>$\rho = 0$<br><i>Oracle</i> : 0.000     |
| CV.min | <b>0.01</b>  | <b>0.01</b>     | <b>0.01</b>      | 17.128      | <b>0.01</b>   |                                                                      |
| AICc   | <b>0.01</b>  | <b>0.01</b>     | 0.023            | 14.556      |               |                                                                      |
| AIC    | <b>0.01</b>  | 0.015           | 0.023            | 18.235      |               |                                                                      |
| BIC    | <b>0.01</b>  | 0.015           | 0.023            | 18.207      |               |                                                                      |
| CV.lse | <b>0.01</b>  | <b>0.01</b>     | <b>0.01</b>      | 6.048       | <b>0.01</b>   | sd( $\mu$ )/ $\sigma = 1$<br>$\rho = 0.5$<br><i>Oracle</i> : 0.000   |
| CV.min | <b>0.01</b>  | <b>0.01</b>     | <b>0.01</b>      | 6.528       | <b>0.01</b>   |                                                                      |
| AICc   | <b>0.01</b>  | <b>0.01</b>     | 0.016            | 5.956       |               |                                                                      |
| AIC    | <b>0.01</b>  | <b>0.01</b>     | 0.016            | 6.944       |               |                                                                      |
| BIC    | <b>0.01</b>  | <b>0.01</b>     | 0.016            | 6.936       |               |                                                                      |
| CV.lse | <b>0.01</b>  | <b>0.01</b>     | <b>0.01</b>      | 1.404       | <b>0.01</b>   | sd( $\mu$ )/ $\sigma = 1$<br>$\rho = 0.9$<br><i>Oracle</i> : 0.000   |
| CV.min | <b>0.01</b>  | <b>0.01</b>     | <b>0.01</b>      | 1.319       | <b>0.01</b>   |                                                                      |
| AICc   | <b>0.01</b>  | <b>0.01</b>     | <b>0.01</b>      | 1.321       |               |                                                                      |
| AIC    | <b>0.01</b>  | <b>0.01</b>     | <b>0.01</b>      | 1.514       |               |                                                                      |
| BIC    | <b>0.01</b>  | <b>0.01</b>     | <b>0.01</b>      | 1.473       |               |                                                                      |
| CV.lse | <b>0.01</b>  | <b>0.01</b>     | <b>0.01</b>      | 58.216      | <b>0.01</b>   | sd( $\mu$ )/ $\sigma = 0.5$<br>$\rho = 0$<br><i>Oracle</i> : 0.004   |
| CV.min | 0.011        | 0.011           | 0.011            | 69.840      | 0.011         |                                                                      |
| AICc   | <b>0.01</b>  | 0.028           | 0.068            | 50.604      |               |                                                                      |
| AIC    | 0.027        | 0.045           | 0.068            | 73.731      |               |                                                                      |
| BIC    | 0.027        | 0.045           | 0.068            | 73.701      |               |                                                                      |
| CV.lse | <b>0.01</b>  | <b>0.01</b>     | <b>0.01</b>      | 21.483      | <b>0.01</b>   | sd( $\mu$ )/ $\sigma = 0.5$<br>$\rho = 0.5$<br><i>Oracle</i> : 0.001 |
| CV.min | <b>0.01</b>  | <b>0.01</b>     | <b>0.01</b>      | 25.571      | <b>0.01</b>   |                                                                      |
| AICc   | <b>0.01</b>  | 0.011           | 0.031            | 19.296      |               |                                                                      |
| AIC    | 0.019        | 0.022           | 0.032            | 27.943      |               |                                                                      |
| BIC    | 0.019        | 0.022           | 0.032            | 27.930      |               |                                                                      |
| CV.lse | <b>0.01</b>  | <b>0.01</b>     | <b>0.01</b>      | 4.172       | <b>0.01</b>   | sd( $\mu$ )/ $\sigma = 0.5$<br>$\rho = 0.9$<br><i>Oracle</i> : 0.002 |
| CV.min | <b>0.01</b>  | <b>0.01</b>     | <b>0.01</b>      | 4.606       | <b>0.01</b>   |                                                                      |
| AICc   | <b>0.01</b>  | <b>0.01</b>     | 0.017            | 4.275       |               |                                                                      |
| AIC    | <b>0.01</b>  | 0.012           | 0.017            | 6.141       |               |                                                                      |
| BIC    | <b>0.01</b>  | 0.012           | 0.017            | 5.281       |               |                                                                      |

Table 68: Nonzero coefficients at n=1000, binary design, dense covariates, and decay 10.

|        | lasso  | GL $\gamma = 1$ | GL $\gamma = 10$ | marginal AL | sparsenet MCP |                                                                        |
|--------|--------|-----------------|------------------|-------------|---------------|------------------------------------------------------------------------|
| CV.1se | 40.29  | 30.26           | 20.06            | 28.88       | 18.91         | $\text{sd}(\mu)/\sigma = 2$<br>$\rho = 0$<br><i>Oracle</i> : 33.33     |
| CV.min | 103.86 | 78.52           | 31.82            | 53.4        | 32.61         |                                                                        |
| AICc   | 98.7   | 77.59           | 49.32            | 50.55       |               |                                                                        |
| AIC    | 610.28 | 607.78          | 579.95           | 51.89       |               |                                                                        |
| BIC    | 30.26  | 26.24           | 20.04            | 25.37       |               |                                                                        |
| CV.1se | 44.17  | 32.54           | 20.14            | 30.83       | 18.92         | $\text{sd}(\mu)/\sigma = 2$<br>$\rho = 0.5$<br><i>Oracle</i> : 33.31   |
| CV.min | 111.63 | 84.28           | 33.09            | 55.46       | 32.41         |                                                                        |
| AICc   | 104.35 | 81.41           | 52.45            | 52.7        |               |                                                                        |
| AIC    | 610.41 | 607.82          | 581.21           | 53.96       |               |                                                                        |
| BIC    | 30.89  | 26.5            | 20               | 25.76       |               |                                                                        |
| CV.1se | 46.46  | 33.38           | 20.35            | 31.05       | 18.88         | $\text{sd}(\mu)/\sigma = 2$<br>$\rho = 0.9$<br><i>Oracle</i> : 33.07   |
| CV.min | 114.78 | 86.83           | 34.4             | 55.02       | 33.29         |                                                                        |
| AICc   | 106.32 | 82.36           | 52.01            | 52.52       |               |                                                                        |
| AIC    | 603.04 | 600.74          | 573.89           | 53.5        |               |                                                                        |
| BIC    | 31.48  | 26.8            | 19.88            | 26.37       |               |                                                                        |
| CV.1se | 24.04  | 17.97           | 12.28            | 37.57       | 11.93         | $\text{sd}(\mu)/\sigma = 1$<br>$\rho = 0$<br><i>Oracle</i> : 26.34     |
| CV.min | 77.63  | 53.9            | 19.1             | 115.49      | 26.51         |                                                                        |
| AICc   | 79.62  | 59.8            | 48.82            | 98.15       |               |                                                                        |
| AIC    | 741.05 | 735.09          | 706.78           | 151.85      |               |                                                                        |
| BIC    | 19.81  | 16.69           | 11.64            | 18.04       |               |                                                                        |
| CV.1se | 25.49  | 18.63           | 12.2             | 40.99       | 11.94         | $\text{sd}(\mu)/\sigma = 1$<br>$\rho = 0.5$<br><i>Oracle</i> : 26.43   |
| CV.min | 82.84  | 57.87           | 18.8             | 119.47      | 24.93         |                                                                        |
| AICc   | 83.24  | 62.61           | 48.16            | 98.94       |               |                                                                        |
| AIC    | 742.59 | 736.48          | 708.61           | 158.24      |               |                                                                        |
| BIC    | 19.78  | 16.56           | 11.67            | 18.13       |               |                                                                        |
| CV.1se | 27.1   | 19.2            | 12.26            | 40.54       | 11.86         | $\text{sd}(\mu)/\sigma = 1$<br>$\rho = 0.9$<br><i>Oracle</i> : 26.14   |
| CV.min | 85.99  | 60.35           | 19.91            | 114.82      | 25.63         |                                                                        |
| AICc   | 85.41  | 64.03           | 48.92            | 100.32      |               |                                                                        |
| AIC    | 736.9  | 730.77          | 702.45           | 151.49      |               |                                                                        |
| BIC    | 19.93  | 16.69           | 11.48            | 18.45       |               |                                                                        |
| CV.1se | 8.77   | 6.95            | 4.92             | 41.55       | 5.06          | $\text{sd}(\mu)/\sigma = 0.5$<br>$\rho = 0$<br><i>Oracle</i> : 19.71   |
| CV.min | 47.87  | 28.53           | 9.83             | 139.79      | 22.76         |                                                                        |
| AICc   | 57.57  | 39.53           | 39.22            | 105.73      |               |                                                                        |
| AIC    | 829.32 | 820.64          | 811.42           | 314.03      |               |                                                                        |
| BIC    | 8.92   | 7.28            | 3.28             | 10.28       |               |                                                                        |
| CV.1se | 8.77   | 7               | 4.8              | 45.41       | 4.88          | $\text{sd}(\mu)/\sigma = 0.5$<br>$\rho = 0.5$<br><i>Oracle</i> : 19.37 |
| CV.min | 50.91  | 31.32           | 9.68             | 143.08      | 20.9          |                                                                        |
| AICc   | 59.87  | 43.09           | 41.37            | 105.96      |               |                                                                        |
| AIC    | 831.55 | 823.04          | 812.95           | 319.27      |               |                                                                        |
| BIC    | 8.23   | 6.88            | 3.21             | 9.9         |               |                                                                        |
| CV.1se | 9.12   | 7.02            | 4.69             | 43.14       | 4.97          | $\text{sd}(\mu)/\sigma = 0.5$<br>$\rho = 0.9$<br><i>Oracle</i> : 19.73 |
| CV.min | 53.04  | 33.09           | 9.76             | 136.65      | 20.59         |                                                                        |
| AICc   | 60.92  | 42.57           | 42.85            | 105.45      |               |                                                                        |
| AIC    | 827.65 | 819.44          | 809.05           | 303.68      |               |                                                                        |
| BIC    | 8.01   | 6.63            | 3.13             | 9.99        |               |                                                                        |

Table 69: Nonzero coefficients at n=1000, binary design, dense covariates, and decay 50.

|        | lasso  | GL $\gamma = 1$ | GL $\gamma = 10$ | marginal AL | sparsenet MCP |                                                                        |
|--------|--------|-----------------|------------------|-------------|---------------|------------------------------------------------------------------------|
| CV.lse | 187.94 | 139.04          | 74.14            | 146.74      | 92.12         | $\text{sd}(\mu)/\sigma = 2$<br>$\rho = 0$<br><i>Oracle</i> : 124.19    |
| CV.min | 291.71 | 225.47          | 100.87           | 213.09      | 158.64        |                                                                        |
| AICc   | 219.14 | 186.37          | 173.07           | 187.93      |               |                                                                        |
| AIC    | 746.18 | 738.06          | 708.24           | 255.23      |               |                                                                        |
| BIC    | 93.41  | 79.6            | 59.12            | 85.74       |               |                                                                        |
| CV.lse | 198.73 | 146.75          | 74.36            | 154.43      | 88.12         | $\text{sd}(\mu)/\sigma = 2$<br>$\rho = 0.5$<br><i>Oracle</i> : 123.77  |
| CV.min | 305.62 | 236.71          | 102.89           | 223.18      | 151.13        |                                                                        |
| AICc   | 225.69 | 192.07          | 173.83           | 196.54      |               |                                                                        |
| AIC    | 751.72 | 743.47          | 714.42           | 268.57      |               |                                                                        |
| BIC    | 91.97  | 79.48           | 58.92            | 86.63       |               |                                                                        |
| CV.lse | 205.35 | 151.83          | 76.5             | 155.42      | 90.38         | $\text{sd}(\mu)/\sigma = 2$<br>$\rho = 0.9$<br><i>Oracle</i> : 123.58  |
| CV.min | 310.8  | 240.87          | 106.84           | 222.72      | 154.28        |                                                                        |
| AICc   | 229.17 | 195.05          | 174.06           | 196.76      |               |                                                                        |
| AIC    | 748.26 | 740.18          | 711.04           | 267.17      |               |                                                                        |
| BIC    | 93.14  | 79.97           | 59.82            | 88.14       |               |                                                                        |
| CV.lse | 93.86  | 62.93           | 32.51            | 119.46      | 63.86         | $\text{sd}(\mu)/\sigma = 1$<br>$\rho = 0$<br><i>Oracle</i> : 90.22     |
| CV.min | 192.97 | 130.58          | 51.98            | 203.89      | 153.25        |                                                                        |
| AICc   | 158.06 | 135.07          | 182.65           | 166.58      |               |                                                                        |
| AIC    | 824.28 | 813.34          | 804.09           | 356.82      |               |                                                                        |
| BIC    | 24.33  | 27.67           | 10.73            | 40.98       |               |                                                                        |
| CV.lse | 97.87  | 66              | 32.8             | 126.4       | 57.39         | $\text{sd}(\mu)/\sigma = 1$<br>$\rho = 0.5$<br><i>Oracle</i> : 90.23   |
| CV.min | 202.76 | 137.52          | 52.74            | 209.57      | 142.98        |                                                                        |
| AICc   | 162.27 | 138.56          | 181.45           | 173.6       |               |                                                                        |
| AIC    | 827.91 | 817.81          | 807.78           | 371.71      |               |                                                                        |
| BIC    | 17.21  | 24.66           | 10.35            | 38.9        |               |                                                                        |
| CV.lse | 102.12 | 68.89           | 32.98            | 126.27      | 59.9          | $\text{sd}(\mu)/\sigma = 1$<br>$\rho = 0.9$<br><i>Oracle</i> : 89.22   |
| CV.min | 205.75 | 143.69          | 54.71            | 207.26      | 145.74        |                                                                        |
| AICc   | 163.21 | 141.64          | 181.46           | 175.05      |               |                                                                        |
| AIC    | 825.37 | 814.97          | 803.91           | 365.56      |               |                                                                        |
| BIC    | 15.59  | 23.61           | 9.46             | 38.24       |               |                                                                        |
| CV.lse | 4.84   | 1.78            | 0.27             | 76.42       | 3.58          | $\text{sd}(\mu)/\sigma = 0.5$<br>$\rho = 0$<br><i>Oracle</i> : 56.16   |
| CV.min | 67.74  | 22.94           | 3.4              | 182.61      | 65.14         |                                                                        |
| AICc   | 73.42  | 78.11           | 61.22            | 134.75      |               |                                                                        |
| AIC    | 873.7  | 862.77          | 873.73           | 462.82      |               |                                                                        |
| BIC    | 0.44   | 0.51            | 0                | 2.68        |               |                                                                        |
| CV.lse | 3.35   | 1.25            | 0.14             | 79.35       | 2.72          | $\text{sd}(\mu)/\sigma = 0.5$<br>$\rho = 0.5$<br><i>Oracle</i> : 56.21 |
| CV.min | 61.22  | 21.26           | 2.7              | 184.1       | 58.35         |                                                                        |
| AICc   | 69.75  | 75.45           | 78.41            | 136.51      |               |                                                                        |
| AIC    | 874.96 | 864.43          | 874.21           | 477.01      |               |                                                                        |
| BIC    | 0.27   | 0.29            | 0                | 2.05        |               |                                                                        |
| CV.lse | 3.16   | 1.02            | 0.17             | 76.28       | 1.82          | $\text{sd}(\mu)/\sigma = 0.5$<br>$\rho = 0.9$<br><i>Oracle</i> : 56.5  |
| CV.min | 62.94  | 22.13           | 2.83             | 179.17      | 59.51         |                                                                        |
| AICc   | 71.97  | 76.23           | 66.45            | 134.42      |               |                                                                        |
| AIC    | 872.69 | 862.02          | 872.35           | 471.88      |               |                                                                        |
| BIC    | 0.27   | 0.33            | 0                | 1.82        |               |                                                                        |

Table 70: Nonzero coefficients at n=1000, binary design, dense covariates, and decay 100.

|        | lasso  | GL $\gamma = 1$ | GL $\gamma = 10$ | marginal AL | sparsenet MCP |                                                                        |
|--------|--------|-----------------|------------------|-------------|---------------|------------------------------------------------------------------------|
| CV.lse | 294.74 | 224.66          | 128.15           | 228         | 238.61        | $\text{sd}(\mu)/\sigma = 2$<br>$\rho = 0$<br><i>Oracle</i> : 208.71    |
| CV.min | 408.34 | 325.49          | 175.48           | 300.71      | 364.97        |                                                                        |
| AICc   | 283.24 | 251.72          | 253.6            | 252.77      |               |                                                                        |
| AIC    | 788.18 | 776.49          | 752.2            | 369.07      |               |                                                                        |
| BIC    | 46.61  | 87.42           | 98.48            | 108.5       |               |                                                                        |
| CV.lse | 305.57 | 235.05          | 129.77           | 235.3       | 226.11        | $\text{sd}(\mu)/\sigma = 2$<br>$\rho = 0.5$<br><i>Oracle</i> : 208.79  |
| CV.min | 421.3  | 339.42          | 181.28           | 308.14      | 350.87        |                                                                        |
| AICc   | 289.92 | 258.65          | 252.81           | 259.51      |               |                                                                        |
| AIC    | 792.48 | 780.96          | 756.95           | 381.33      |               |                                                                        |
| BIC    | 22.87  | 81.48           | 100.23           | 103.41      |               |                                                                        |
| CV.lse | 311.09 | 238.15          | 134.29           | 234.09      | 232           | $\text{sd}(\mu)/\sigma = 2$<br>$\rho = 0.9$<br><i>Oracle</i> : 209.43  |
| CV.min | 425.03 | 341.01          | 187.11           | 307.37      | 356.24        |                                                                        |
| AICc   | 291.91 | 259.85          | 252.12           | 258.04      |               |                                                                        |
| AIC    | 790.06 | 779.16          | 754.31           | 381.4       |               |                                                                        |
| BIC    | 17.89  | 78.71           | 103.31           | 100.59      |               |                                                                        |
| CV.lse | 117.97 | 66.72           | 16.48            | 162.68      | 114           | $\text{sd}(\mu)/\sigma = 1$<br>$\rho = 0$<br><i>Oracle</i> : 143.25    |
| CV.min | 242.29 | 150.86          | 44.91            | 252.26      | 244.73        |                                                                        |
| AICc   | 180.21 | 169.95          | 232.87           | 199.96      |               |                                                                        |
| AIC    | 845.94 | 833.3           | 832.89           | 447.23      |               |                                                                        |
| BIC    | 0.76   | 2.67            | 0.19             | 13.48       |               |                                                                        |
| CV.lse | 115.95 | 65.9            | 13.95            | 167.65      | 110.69        | $\text{sd}(\mu)/\sigma = 1$<br>$\rho = 0.5$<br><i>Oracle</i> : 144     |
| CV.min | 248.62 | 157.09          | 41.49            | 256.44      | 248.62        |                                                                        |
| AICc   | 180.51 | 173.18          | 234.91           | 204.3       |               |                                                                        |
| AIC    | 848.75 | 836.24          | 834.17           | 457.89      |               |                                                                        |
| BIC    | 0.66   | 1.65            | 0.03             | 9.28        |               |                                                                        |
| CV.lse | 118.78 | 69.51           | 12.47            | 166.55      | 110.96        | $\text{sd}(\mu)/\sigma = 1$<br>$\rho = 0.9$<br><i>Oracle</i> : 143.6   |
| CV.min | 251.2  | 160.55          | 41.95            | 252.97      | 249.02        |                                                                        |
| AICc   | 179.73 | 174.42          | 236.68           | 205.2       |               |                                                                        |
| AIC    | 846.39 | 833.79          | 831.4            | 457.58      |               |                                                                        |
| BIC    | 0.45   | 1.24            | 0.13             | 8.69        |               |                                                                        |
| CV.lse | 1.75   | 0.14            | 0.03             | 81.17       | 1.44          | $\text{sd}(\mu)/\sigma = 0.5$<br>$\rho = 0$<br><i>Oracle</i> : 77.92   |
| CV.min | 50.5   | 7.13            | 1.01             | 194.17      | 52.22         |                                                                        |
| AICc   | 61.46  | 92.2            | 42.85            | 137.24      |               |                                                                        |
| AIC    | 881.85 | 869.79          | 887.57           | 510.94      |               |                                                                        |
| BIC    | 0.11   | 0.05            | 0                | 0.89        |               |                                                                        |
| CV.lse | 1.26   | 0.12            | 0.02             | 82.25       | 1.08          | $\text{sd}(\mu)/\sigma = 0.5$<br>$\rho = 0.5$<br><i>Oracle</i> : 78.04 |
| CV.min | 41.82  | 6.08            | 0.75             | 193.11      | 39.59         |                                                                        |
| AICc   | 53.43  | 85.17           | 50.76            | 138.06      |               |                                                                        |
| AIC    | 882.18 | 871.13          | 887.71           | 523.07      |               |                                                                        |
| BIC    | 0.08   | 0.04            | 0                | 0.8         |               |                                                                        |
| CV.lse | 0.77   | 0.12            | 0.01             | 77.97       | 0.72          | $\text{sd}(\mu)/\sigma = 0.5$<br>$\rho = 0.9$<br><i>Oracle</i> : 77.5  |
| CV.min | 40.83  | 5.28            | 0.77             | 188.83      | 39.76         |                                                                        |
| AICc   | 54.18  | 85.55           | 46.09            | 134.93      |               |                                                                        |
| AIC    | 880.12 | 868.15          | 885.31           | 516.08      |               |                                                                        |
| BIC    | 0.1    | 0.06            | 0                | 0.69        |               |                                                                        |

Table 71: Nonzero coefficients at n=1000, binary design, dense covariates, and decay 200.

|        | lasso  | GL $\gamma = 1$ | GL $\gamma = 10$ | marginal AL | sparsenet MCP |                                                                 |
|--------|--------|-----------------|------------------|-------------|---------------|-----------------------------------------------------------------|
| CV.lse | 383.94 | 283.47          | 150.44           | 298.63      | 405.93        | $sd(\mu)/\sigma = 2$<br>$\rho = 0$<br><i>Oracle</i> : 293.07    |
| CV.min | 511.85 | 408.4           | 245.72           | 379.06      | 544.93        |                                                                 |
| AICc   | 309.75 | 297.8           | 336.43           | 300.16      |               |                                                                 |
| AIC    | 821.08 | 804.86          | 787.57           | 470.44      |               |                                                                 |
| BIC    | 0.35   | 1.58            | 98.03            | 13.45       |               |                                                                 |
| CV.lse | 386.54 | 288.5           | 148.59           | 299.91      | 407.31        | $sd(\mu)/\sigma = 2$<br>$\rho = 0.5$<br><i>Oracle</i> : 293.71  |
| CV.min | 519.75 | 416.18          | 245.95           | 379.94      | 555.02        |                                                                 |
| AICc   | 308.44 | 301.81          | 337.2            | 301.94      |               |                                                                 |
| AIC    | 825.11 | 809.5           | 790.08           | 477.91      |               |                                                                 |
| BIC    | 0.33   | 0.69            | 81.75            | 8.08        |               |                                                                 |
| CV.lse | 394    | 292.04          | 145.63           | 296.62      | 412.44        | $sd(\mu)/\sigma = 2$<br>$\rho = 0.9$<br><i>Oracle</i> : 293.26  |
| CV.min | 524.47 | 420.01          | 245.65           | 378.06      | 560.97        |                                                                 |
| AICc   | 310.24 | 301.48          | 337.78           | 297.73      |               |                                                                 |
| AIC    | 822.44 | 806.85          | 788.27           | 478.03      |               |                                                                 |
| BIC    | 0.31   | 0.75            | 77.53            | 6.91        |               |                                                                 |
| CV.lse | 99.77  | 23.82           | 0.51             | 186.02      | 105.59        | $sd(\mu)/\sigma = 1$<br>$\rho = 0$<br><i>Oracle</i> : 216.99    |
| CV.min | 259.46 | 100.91          | 5.01             | 285.17      | 263.4         |                                                                 |
| AICc   | 167.62 | 192.74          | 279.62           | 211.05      |               |                                                                 |
| AIC    | 859.47 | 844.17          | 852.09           | 513.5       |               |                                                                 |
| BIC    | 0.17   | 0.12            | 0                | 2.08        |               |                                                                 |
| CV.lse | 82.81  | 14.43           | 0.27             | 187.17      | 85.67         | $sd(\mu)/\sigma = 1$<br>$\rho = 0.5$<br><i>Oracle</i> : 214.81  |
| CV.min | 249.8  | 85.88           | 3.7              | 286.65      | 254.83        |                                                                 |
| AICc   | 156.61 | 191.14          | 283.4            | 211.14      |               |                                                                 |
| AIC    | 861.78 | 846.79          | 852.79           | 520.13      |               |                                                                 |
| BIC    | 0.14   | 0.12            | 0                | 1.62        |               |                                                                 |
| CV.lse | 82.72  | 16.1            | 0.28             | 181.5       | 83.58         | $sd(\mu)/\sigma = 1$<br>$\rho = 0.9$<br><i>Oracle</i> : 215.03  |
| CV.min | 249.18 | 91.76           | 3.45             | 279.84      | 253.07        |                                                                 |
| AICc   | 158.92 | 189.29          | 279.88           | 210.19      |               |                                                                 |
| AIC    | 859.39 | 844.07          | 850.26           | 519.86      |               |                                                                 |
| BIC    | 0.14   | 0.08            | 0                | 1.45        |               |                                                                 |
| CV.lse | 0.7    | 0.01            | 0.01             | 81.98       | 0.76          | $sd(\mu)/\sigma = 0.5$<br>$\rho = 0$<br><i>Oracle</i> : 90.72   |
| CV.min | 36.36  | 2.03            | 0.47             | 198.47      | 36.68         |                                                                 |
| AICc   | 46.73  | 112.57          | 22.42            | 139.26      |               |                                                                 |
| AIC    | 885.63 | 873.54          | 896.81           | 537.14      |               |                                                                 |
| BIC    | 0.07   | 0.01            | 23.29            | 0.52        |               |                                                                 |
| CV.lse | 0.69   | 0.02            | 0                | 80.73       | 0.67          | $sd(\mu)/\sigma = 0.5$<br>$\rho = 0.5$<br><i>Oracle</i> : 91.39 |
| CV.min | 29.29  | 1.66            | 0.39             | 197.07      | 27.85         |                                                                 |
| AICc   | 37.82  | 101.97          | 23.89            | 138.07      |               |                                                                 |
| AIC    | 885.94 | 874.09          | 896.62           | 543         |               |                                                                 |
| BIC    | 0.05   | 0.01            | 5.37             | 0.42        |               |                                                                 |
| CV.lse | 0.18   | 0.01            | 0.01             | 74.07       | 0.56          | $sd(\mu)/\sigma = 0.5$<br>$\rho = 0.9$<br><i>Oracle</i> : 89.48 |
| CV.min | 27.58  | 1.41            | 0.33             | 189.77      | 25.25         |                                                                 |
| AICc   | 38.09  | 99.59           | 23.41            | 134.13      |               |                                                                 |
| AIC    | 883.15 | 871.17          | 893.98           | 538.49      |               |                                                                 |
| BIC    | 0.06   | 0.01            | 6.28             | 0.45        |               |                                                                 |

Table 72: Nonzero coefficients at n=1000, continuous design, dense covariates, and decay 10.

|        | lasso  | GL $\gamma = 1$ | GL $\gamma = 10$ | marginal AL | sparsenet MCP |                                                                      |
|--------|--------|-----------------|------------------|-------------|---------------|----------------------------------------------------------------------|
| CV.1se | 40.23  | 30.77           | 20.09            | 29.14       | 18.78         | sd( $\mu$ )/ $\sigma = 2$<br>$\rho = 0$<br><i>Oracle</i> : 33.25     |
| CV.min | 103.76 | 78.8            | 31.81            | 53.81       | 32.47         |                                                                      |
| AICc   | 98.46  | 71.29           | 25.58            | 50.62       |               |                                                                      |
| AIC    | 609.88 | 607.64          | 580.35           | 51.92       |               |                                                                      |
| BIC    | 30.07  | 25.32           | 18.57            | 25.45       |               |                                                                      |
| CV.1se | 85.95  | 59.01           | 22.88            | 35.13       | 18.98         | sd( $\mu$ )/ $\sigma = 2$<br>$\rho = 0.5$<br><i>Oracle</i> : 32.89   |
| CV.min | 173.58 | 132.96          | 51.72            | 45.41       | 30.13         |                                                                      |
| AICc   | 146.22 | 111.74          | 45.27            | 45.18       |               |                                                                      |
| AIC    | 539.76 | 539.6           | 515.24           | 45.28       |               |                                                                      |
| BIC    | 39.09  | 29.4            | 16.72            | 34.08       |               |                                                                      |
| CV.1se | 150.02 | 120.25          | 60.25            | 11.45       | 32.54         | sd( $\mu$ )/ $\sigma = 2$<br>$\rho = 0.9$<br><i>Oracle</i> : 30.44   |
| CV.min | 226.55 | 191.62          | 98.54            | 12.54       | 58.04         |                                                                      |
| AICc   | 190.68 | 160.9           | 82.9             | 12.54       |               |                                                                      |
| AIC    | 243    | 239.05          | 197.57           | 12.54       |               |                                                                      |
| BIC    | 71.07  | 57.39           | 20.73            | 12.46       |               |                                                                      |
| CV.1se | 24.05  | 18.18           | 12.51            | 38.68       | 11.99         | sd( $\mu$ )/ $\sigma = 1$<br>$\rho = 0$<br><i>Oracle</i> : 26.18     |
| CV.min | 77.57  | 53.9            | 19.19            | 117.71      | 25.94         |                                                                      |
| AICc   | 79.04  | 49.77           | 13.8             | 97.49       |               |                                                                      |
| AIC    | 741.44 | 735.3           | 707.14           | 154.26      |               |                                                                      |
| BIC    | 19.89  | 15.73           | 10.19            | 18.04       |               |                                                                      |
| CV.1se | 45.8   | 31.51           | 12.76            | 65.94       | 12.36         | sd( $\mu$ )/ $\sigma = 1$<br>$\rho = 0.5$<br><i>Oracle</i> : 25.84   |
| CV.min | 125.9  | 93.68           | 28.08            | 125.17      | 23.86         |                                                                      |
| AICc   | 115.44 | 82.27           | 24.26            | 112.66      |               |                                                                      |
| AIC    | 688.78 | 684             | 652.99           | 129.65      |               |                                                                      |
| BIC    | 19.86  | 15.23           | 8.09             | 24.1        |               |                                                                      |
| CV.1se | 62.36  | 64.82           | 38.31            | 15.39       | 24.64         | sd( $\mu$ )/ $\sigma = 1$<br>$\rho = 0.9$<br><i>Oracle</i> : 23.28   |
| CV.min | 158.96 | 137.62          | 66.45            | 26.62       | 50.78         |                                                                      |
| AICc   | 141.65 | 114.83          | 50.41            | 26.15       |               |                                                                      |
| AIC    | 377.88 | 388.6           | 358.26           | 26.24       |               |                                                                      |
| BIC    | 1.36   | 1.04            | 1.11             | 15.95       |               |                                                                      |
| CV.1se | 8.8    | 7               | 4.92             | 44.83       | 5.08          | sd( $\mu$ )/ $\sigma = 0.5$<br>$\rho = 0$<br><i>Oracle</i> : 19.21   |
| CV.min | 48.52  | 28.86           | 9.74             | 141.58      | 21.95         |                                                                      |
| AICc   | 56.72  | 24.17           | 4.06             | 106.35      |               |                                                                      |
| AIC    | 829.75 | 821.38          | 811.62           | 313.25      |               |                                                                      |
| BIC    | 8.98   | 6.23            | 1.63             | 10.14       |               |                                                                      |
| CV.1se | 4.39   | 5.4             | 3.2              | 52.64       | 5.18          | sd( $\mu$ )/ $\sigma = 0.5$<br>$\rho = 0.5$<br><i>Oracle</i> : 18.97 |
| CV.min | 56.57  | 45.85           | 11.03            | 139.38      | 16.07         |                                                                      |
| AICc   | 66.87  | 38.72           | 2.97             | 114.28      |               |                                                                      |
| AIC    | 798.28 | 790.49          | 773.39           | 252.81      |               |                                                                      |
| BIC    | 2.44   | 1.77            | 0.96             | 3.45        |               |                                                                      |
| CV.1se | 1.01   | 1               | 1                | 12.12       | 1.22          | sd( $\mu$ )/ $\sigma = 0.5$<br>$\rho = 0.9$<br><i>Oracle</i> : 16.45 |
| CV.min | 6.89   | 5.06            | 2.4              | 56.98       | 10.16         |                                                                      |
| AICc   | 12.86  | 1.84            | 1                | 55.73       |               |                                                                      |
| AIC    | 533.45 | 552.92          | 519.96           | 64.96       |               |                                                                      |
| BIC    | 1.36   | 1.03            | 1                | 2.65        |               |                                                                      |



Table 73: Nonzero coefficients at n=1000, continuous design, dense covariates, and decay 50.

|        | lasso  | GL $\gamma = 1$ | GL $\gamma = 10$ | marginal AL | sparsenet MCP |                                                                 |
|--------|--------|-----------------|------------------|-------------|---------------|-----------------------------------------------------------------|
| CV.lse | 189.31 | 139.46          | 73.87            | 147.15      | 91            | $sd(\mu)/\sigma = 2$<br>$\rho = 0$<br><i>Oracle</i> : 122.78    |
| CV.min | 294.18 | 225.93          | 100.33           | 214.59      | 157.98        |                                                                 |
| AICc   | 219.73 | 179.51          | 129.5            | 189.09      |               |                                                                 |
| AIC    | 744.98 | 736.27          | 707.21           | 254.54      |               |                                                                 |
| BIC    | 92.2   | 75.5            | 52.55            | 86.25       |               |                                                                 |
| CV.lse | 286.64 | 223.7           | 103.06           | 201.21      | 92.9          | $sd(\mu)/\sigma = 2$<br>$\rho = 0.5$<br><i>Oracle</i> : 122.51  |
| CV.min | 396.96 | 324.17          | 154.11           | 258.04      | 140.39        |                                                                 |
| AICc   | 282.54 | 240.41          | 163.36           | 234.93      |               |                                                                 |
| AIC    | 725.19 | 717.34          | 686.23           | 275.34      |               |                                                                 |
| BIC    | 47.23  | 75.62           | 59.96            | 85.34       |               |                                                                 |
| CV.lse | 343.32 | 289.56          | 174.1            | 48.16       | 139.93        | $sd(\mu)/\sigma = 2$<br>$\rho = 0.9$<br><i>Oracle</i> : 119.51  |
| CV.min | 433.1  | 383.15          | 223.99           | 63.04       | 179.43        |                                                                 |
| AICc   | 321.61 | 289.37          | 208.99           | 62.33       |               |                                                                 |
| AIC    | 439.84 | 423.48          | 377.82           | 62.64       |               |                                                                 |
| BIC    | 1.5    | 1.05            | 1.75             | 32.92       |               |                                                                 |
| CV.lse | 94.13  | 62.87           | 32.34            | 120.57      | 63.43         | $sd(\mu)/\sigma = 1$<br>$\rho = 0$<br><i>Oracle</i> : 90.22     |
| CV.min | 194.28 | 130.79          | 51.03            | 205.17      | 151.64        |                                                                 |
| AICc   | 156.58 | 120.05          | 91.37            | 165.97      |               |                                                                 |
| AIC    | 823.94 | 812.81          | 803.32           | 357         |               |                                                                 |
| BIC    | 24.13  | 21.07           | 1.31             | 40.85       |               |                                                                 |
| CV.lse | 110.61 | 97.57           | 41.36            | 149.28      | 57.1          | $sd(\mu)/\sigma = 1$<br>$\rho = 0.5$<br><i>Oracle</i> : 89.65   |
| CV.min | 247.13 | 199.81          | 77.33            | 228.2       | 106.15        |                                                                 |
| AICc   | 185.73 | 162.71          | 130.64           | 196.87      |               |                                                                 |
| AIC    | 813.03 | 804.22          | 788.13           | 382.78      |               |                                                                 |
| BIC    | 1.29   | 0.9             | 0.12             | 4.35        |               |                                                                 |
| CV.lse | 13.2   | 38.87           | 28.91            | 46.86       | 86.02         | $sd(\mu)/\sigma = 1$<br>$\rho = 0.9$<br><i>Oracle</i> : 86.22   |
| CV.min | 91.69  | 148.19          | 77.18            | 90.96       | 136.18        |                                                                 |
| AICc   | 66.79  | 54.07           | 51.49            | 87.81       |               |                                                                 |
| AIC    | 567.7  | 553.16          | 511.68           | 94.55       |               |                                                                 |
| BIC    | 1.45   | 1.05            | 1                | 3.31        |               |                                                                 |
| CV.lse | 4.79   | 1.67            | 0.21             | 79.02       | 3.63          | $sd(\mu)/\sigma = 0.5$<br>$\rho = 0$<br><i>Oracle</i> : 55.94   |
| CV.min | 66.4   | 24.39           | 3.5              | 183.81      | 65.76         |                                                                 |
| AICc   | 72.26  | 28.51           | 0.32             | 135.4       |               |                                                                 |
| AIC    | 872.68 | 861.48          | 872.95           | 464.25      |               |                                                                 |
| BIC    | 0.38   | 0.09            | 0                | 2.63        |               |                                                                 |
| CV.lse | 0.13   | 0.05            | 0.01             | 42.91       | 0.5           | $sd(\mu)/\sigma = 0.5$<br>$\rho = 0.5$<br><i>Oracle</i> : 55.62 |
| CV.min | 14.64  | 7.21            | 0.83             | 146.94      | 13.54         |                                                                 |
| AICc   | 30.47  | 3.29            | 0.45             | 112.22      |               |                                                                 |
| AIC    | 865.25 | 855.61          | 859.09           | 477.54      |               |                                                                 |
| BIC    | 0.16   | 0.07            | 0                | 0.66        |               |                                                                 |
| CV.lse | 0.17   | 0.19            | 0.27             | 3.57        | 0.45          | $sd(\mu)/\sigma = 0.5$<br>$\rho = 0.9$<br><i>Oracle</i> : 52.3  |
| CV.min | 7.51   | 4.62            | 1.39             | 50.23       | 2.88          |                                                                 |
| AICc   | 12.82  | 1.48            | 0.93             | 56.12       |               |                                                                 |
| AIC    | 694.36 | 675.13          | 662.68           | 99.31       |               |                                                                 |
| BIC    | 1.3    | 1.01            | 0.72             | 1.48        |               |                                                                 |

Table 74: Nonzero coefficients at n=1000, continuous design, dense covariates, and decay 100.

|        | lasso  | GL $\gamma = 1$ | GL $\gamma = 10$ | marginal AL | sparsenet MCP |                                                                      |
|--------|--------|-----------------|------------------|-------------|---------------|----------------------------------------------------------------------|
| CV.lse | 295.67 | 224.76          | 126.9            | 227.98      | 237.94        | sd( $\mu$ )/ $\sigma = 2$<br>$\rho = 0$<br><i>Oracle</i> : 209.76    |
| CV.min | 409.33 | 324.61          | 174.62           | 300.53      | 365.75        |                                                                      |
| AICc   | 283.83 | 244.32          | 221.26           | 252.41      |               |                                                                      |
| AIC    | 787.27 | 775.72          | 750.87           | 367.77      |               |                                                                      |
| BIC    | 48.51  | 76.81           | 94.48            | 108.98      |               |                                                                      |
| CV.lse | 381.43 | 313.85          | 185.07           | 258.75      | 183.17        | sd( $\mu$ )/ $\sigma = 2$<br>$\rho = 0.5$<br><i>Oracle</i> : 209.36  |
| CV.min | 502.88 | 427.02          | 253.3            | 342.89      | 238.47        |                                                                      |
| AICc   | 326.77 | 300.72          | 247.32           | 282.31      |               |                                                                      |
| AIC    | 785.69 | 775.73          | 749.02           | 411.89      |               |                                                                      |
| BIC    | 0.79   | 0.54            | 34.18            | 3.68        |               |                                                                      |
| CV.lse | 424.02 | 368.39          | 247.85           | 61.94       | 209.98        | sd( $\mu$ )/ $\sigma = 2$<br>$\rho = 0.9$<br><i>Oracle</i> : 205.71  |
| CV.min | 534.23 | 478.03          | 314.91           | 110.51      | 258.8         |                                                                      |
| AICc   | 346.23 | 340.85          | 289.79           | 106.08      |               |                                                                      |
| AIC    | 549.23 | 528.48          | 478.09           | 114.49      |               |                                                                      |
| BIC    | 1.48   | 1.05            | 1                | 2.21        |               |                                                                      |
| CV.lse | 118.11 | 65.7            | 17.56            | 164.9       | 113.82        | sd( $\mu$ )/ $\sigma = 1$<br>$\rho = 0$<br><i>Oracle</i> : 143.47    |
| CV.min | 245.02 | 151.66          | 45.64            | 252.48      | 245.91        |                                                                      |
| AICc   | 179.45 | 152.77          | 172.19           | 199.51      |               |                                                                      |
| AIC    | 845.22 | 832.26          | 831.89           | 447.16      |               |                                                                      |
| BIC    | 0.88   | 0.61            | 0.02             | 14.12       |               |                                                                      |
| CV.lse | 22.33  | 21.53           | 0.62             | 140.9       | 25.15         | sd( $\mu$ )/ $\sigma = 1$<br>$\rho = 0.5$<br><i>Oracle</i> : 143.47  |
| CV.min | 175.27 | 122.49          | 6.11             | 241.24      | 130.73        |                                                                      |
| AICc   | 123.73 | 133.25          | 175.33           | 191.04      |               |                                                                      |
| AIC    | 843.24 | 832.53          | 824.17           | 488.75      |               |                                                                      |
| BIC    | 0.29   | 0.12            | 0                | 1.27        |               |                                                                      |
| CV.lse | 0.66   | 0.68            | 0.53             | 21.21       | 2.22          | sd( $\mu$ )/ $\sigma = 1$<br>$\rho = 0.9$<br><i>Oracle</i> : 139.45  |
| CV.min | 9.09   | 8.97            | 1.55             | 88.13       | 14.64         |                                                                      |
| AICc   | 16.5   | 1.8             | 1.58             | 92.84       |               |                                                                      |
| AIC    | 648.45 | 629.05          | 596.25           | 147.76      |               |                                                                      |
| BIC    | 1.46   | 1.04            | 0.96             | 1.54        |               |                                                                      |
| CV.lse | 1.41   | 0.22            | 0.01             | 84.18       | 1.24          | sd( $\mu$ )/ $\sigma = 0.5$<br>$\rho = 0$<br><i>Oracle</i> : 77.65   |
| CV.min | 50.87  | 7.05            | 0.99             | 194.69      | 51.01         |                                                                      |
| AICc   | 60.65  | 15.8            | 0.77             | 139.02      |               |                                                                      |
| AIC    | 880.93 | 869.36          | 887.1            | 513.59      |               |                                                                      |
| BIC    | 0.09   | 0.01            | 72.43            | 0.91        |               |                                                                      |
| CV.lse | 0.03   | 0.01            | 0                | 33.29       | 0.46          | sd( $\mu$ )/ $\sigma = 0.5$<br>$\rho = 0.5$<br><i>Oracle</i> : 77.66 |
| CV.min | 9.02   | 2.35            | 0.31             | 135.51      | 9.12          |                                                                      |
| AICc   | 20.81  | 0.5             | 0.54             | 101.99      |               |                                                                      |
| AIC    | 871.52 | 859.96          | 871.15           | 515.82      |               |                                                                      |
| BIC    | 0.06   | 0.01            | 0                | 0.35        |               |                                                                      |
| CV.lse | 0.03   | 0.04            | 0.05             | 0.93        | 0.44          | sd( $\mu$ )/ $\sigma = 0.5$<br>$\rho = 0.9$<br><i>Oracle</i> : 73.55 |
| CV.min | 6.97   | 4.16            | 1.25             | 33.26       | 4.64          |                                                                      |
| AICc   | 12.79  | 1.19            | 0.34             | 37.12       |               |                                                                      |
| AIC    | 746.35 | 724.68          | 727.14           | 91.97       |               |                                                                      |
| BIC    | 0.72   | 0.56            | 0.09             | 1.17        |               |                                                                      |

Table 75: Nonzero coefficients at n=1000, continuous design, dense covariates, and decay 200.

|        | lasso  | GL $\gamma = 1$ | GL $\gamma = 10$ | marginal AL | sparsenet MCP |                                                                        |
|--------|--------|-----------------|------------------|-------------|---------------|------------------------------------------------------------------------|
| CV.lse | 387.27 | 282.37          | 148.34           | 299.09      | 405.88        | $\text{sd}(\mu)/\sigma = 2$<br>$\rho = 0$<br><i>Oracle</i> : 293.21    |
| CV.min | 514.87 | 409.51          | 243.47           | 379.2       | 546.18        |                                                                        |
| AICc   | 308.96 | 290.14          | 321.3            | 300.18      |               |                                                                        |
| AIC    | 820.4  | 803.49          | 785.31           | 467.88      |               |                                                                        |
| BIC    | 0.4    | 0.13            | 239.99           | 13.26       |               |                                                                        |
| CV.lse | 362.56 | 272.47          | 21.94            | 237.95      | 337.59        | $\text{sd}(\mu)/\sigma = 2$<br>$\rho = 0.5$<br><i>Oracle</i> : 293.08  |
| CV.min | 545.77 | 453.54          | 80.12            | 341.17      | 570.23        |                                                                        |
| AICc   | 206.92 | 294.14          | 346.83           | 258.82      |               |                                                                        |
| AIC    | 825.52 | 811.79          | 789.99           | 506.01      |               |                                                                        |
| BIC    | 0.18   | 0.06            | 11.17            | 1.12        |               |                                                                        |
| CV.lse | 138.52 | 113.35          | 1.64             | 26.09       | 58.83         | $\text{sd}(\mu)/\sigma = 2$<br>$\rho = 0.9$<br><i>Oracle</i> : 292.24  |
| CV.min | 367.65 | 299.18          | 8.68             | 108.77      | 236.57        |                                                                        |
| AICc   | 21.03  | 49.19           | 373.04           | 108.62      |               |                                                                        |
| AIC    | 655.08 | 630.68          | 585.9            | 205.08      |               |                                                                        |
| BIC    | 1.43   | 1.02            | 0.83             | 1.57        |               |                                                                        |
| CV.lse | 100.97 | 21.71           | 0.46             | 188.19      | 103.56        | $\text{sd}(\mu)/\sigma = 1$<br>$\rho = 0$<br><i>Oracle</i> : 215.38    |
| CV.min | 262.26 | 97.96           | 5.38             | 285.37      | 264.16        |                                                                        |
| AICc   | 164.94 | 172.26          | 167.66           | 211.65      |               |                                                                        |
| AIC    | 859.08 | 842.76          | 851.85           | 513.31      |               |                                                                        |
| BIC    | 0.21   | 0.02            | 57.73            | 2.33        |               |                                                                        |
| CV.lse | 1.16   | 0.22            | 0.01             | 100.15      | 0.94          | $\text{sd}(\mu)/\sigma = 1$<br>$\rho = 0.5$<br><i>Oracle</i> : 215.2   |
| CV.min | 43.6   | 11.7            | 0.7              | 220.4       | 43.56         |                                                                        |
| AICc   | 50.78  | 20.82           | 92.93            | 157.62      |               |                                                                        |
| AIC    | 856.8  | 842.84          | 841.34           | 536.23      |               |                                                                        |
| BIC    | 0.09   | 0.02            | 0                | 0.49        |               |                                                                        |
| CV.lse | 0.08   | 0.06            | 0.12             | 2.54        | 0.43          | $\text{sd}(\mu)/\sigma = 1$<br>$\rho = 0.9$<br><i>Oracle</i> : 211.72  |
| CV.min | 8.94   | 5.47            | 1.44             | 47.71       | 5.17          |                                                                        |
| AICc   | 15.13  | 1.57            | 0.61             | 55.82       |               |                                                                        |
| AIC    | 719.38 | 695.56          | 676.52           | 227.69      |               |                                                                        |
| BIC    | 1.02   | 0.78            | 0.29             | 1.44        |               |                                                                        |
| CV.lse | 0.54   | 0.02            | 0.01             | 84.71       | 0.61          | $\text{sd}(\mu)/\sigma = 0.5$<br>$\rho = 0$<br><i>Oracle</i> : 91.35   |
| CV.min | 36.97  | 1.99            | 0.41             | 199.88      | 34.32         |                                                                        |
| AICc   | 46.82  | 11.92           | 0                | 138.77      |               |                                                                        |
| AIC    | 885.04 | 873.33          | 897.03           | 543         |               |                                                                        |
| BIC    | 0.07   | 0               | 630.51           | 0.52        |               |                                                                        |
| CV.lse | 0.02   | 0               | 0                | 29.41       | 0.44          | $\text{sd}(\mu)/\sigma = 0.5$<br>$\rho = 0.5$<br><i>Oracle</i> : 90.94 |
| CV.min | 7.32   | 1.13            | 0.21             | 130.17      | 7.21          |                                                                        |
| AICc   | 17.58  | 0.3             | 0                | 98.87       |               |                                                                        |
| AIC    | 872.97 | 860.48          | 877.79           | 531.04      |               |                                                                        |
| BIC    | 0.05   | 0               | 16.53            | 0.3         |               |                                                                        |
| CV.lse | 0.01   | 0.01            | 0.01             | 0.7         | 0.43          | $\text{sd}(\mu)/\sigma = 0.5$<br>$\rho = 0.9$<br><i>Oracle</i> : 87.01 |
| CV.min | 5.43   | 2.73            | 0.68             | 30.47       | 4.77          |                                                                        |
| AICc   | 11.34  | 0.51            | 0.04             | 32.27       |               |                                                                        |
| AIC    | 778.52 | 754.45          | 769.48           | 99.03       |               |                                                                        |
| BIC    | 0.19   | 0.11            | 0                | 0.57        |               |                                                                        |

Table 76: Nonzero coefficients at n=1000, binary design, sparse covariates, and decay 10.

|        | lasso  | GL $\gamma = 1$ | GL $\gamma = 10$ | marginal AL | sparsenet MCP |                                                                    |
|--------|--------|-----------------|------------------|-------------|---------------|--------------------------------------------------------------------|
| CV.1se | 40.31  | 30.25           | 20.05            | 28.86       | 18.91         | sd( $\mu$ )/ $\sigma = 2$<br>$\rho = 0$<br><i>Oracle : 100</i>     |
| CV.min | 104.08 | 78.72           | 31.83            | 53.45       | 32.56         |                                                                    |
| AICc   | 98.98  | 77.6            | 49.53            | 50.58       |               |                                                                    |
| AIC    | 610.24 | 607.85          | 580.06           | 51.93       |               |                                                                    |
| BIC    | 30.26  | 26.27           | 20.03            | 25.44       |               |                                                                    |
| CV.1se | 44.05  | 32.41           | 20.14            | 30.74       | 18.92         | sd( $\mu$ )/ $\sigma = 2$<br>$\rho = 0.5$<br><i>Oracle : 100</i>   |
| CV.min | 111.63 | 84.08           | 33.12            | 55.42       | 32.39         |                                                                    |
| AICc   | 104.11 | 81.17           | 52.37            | 52.6        |               |                                                                    |
| AIC    | 610.47 | 607.84          | 581.21           | 53.89       |               |                                                                    |
| BIC    | 30.88  | 26.52           | 19.98            | 25.81       |               |                                                                    |
| CV.1se | 46.51  | 33.25           | 20.37            | 30.94       | 18.89         | sd( $\mu$ )/ $\sigma = 2$<br>$\rho = 0.9$<br><i>Oracle : 100</i>   |
| CV.min | 114.65 | 86.73           | 34.43            | 54.94       | 33.32         |                                                                    |
| AICc   | 106.36 | 82.32           | 52.09            | 52.42       |               |                                                                    |
| AIC    | 603.01 | 600.65          | 573.87           | 53.42       |               |                                                                    |
| BIC    | 31.45  | 26.79           | 19.89            | 26.34       |               |                                                                    |
| CV.1se | 24.12  | 18              | 12.28            | 37.66       | 11.93         | sd( $\mu$ )/ $\sigma = 1$<br>$\rho = 0$<br><i>Oracle : 100</i>     |
| CV.min | 77.65  | 53.99           | 19.18            | 115.31      | 26.75         |                                                                    |
| AICc   | 79.7   | 60.07           | 48.95            | 98.08       |               |                                                                    |
| AIC    | 740.95 | 735.1           | 706.81           | 151.88      |               |                                                                    |
| BIC    | 19.82  | 16.68           | 11.65            | 18.05       |               |                                                                    |
| CV.1se | 25.48  | 18.62           | 12.19            | 40.73       | 11.94         | sd( $\mu$ )/ $\sigma = 1$<br>$\rho = 0.5$<br><i>Oracle : 100</i>   |
| CV.min | 82.88  | 57.91           | 18.81            | 119.38      | 24.97         |                                                                    |
| AICc   | 83.27  | 62.65           | 48.1             | 99          |               |                                                                    |
| AIC    | 742.55 | 736.42          | 708.63           | 158.35      |               |                                                                    |
| BIC    | 19.8   | 16.57           | 11.68            | 18.14       |               |                                                                    |
| CV.1se | 27.06  | 19.2            | 12.25            | 40.53       | 11.86         | sd( $\mu$ )/ $\sigma = 1$<br>$\rho = 0.9$<br><i>Oracle : 100</i>   |
| CV.min | 85.96  | 60.33           | 19.87            | 114.79      | 25.6          |                                                                    |
| AICc   | 85.49  | 64.06           | 48.59            | 100.28      |               |                                                                    |
| AIC    | 737.07 | 730.88          | 702.58           | 151.4       |               |                                                                    |
| BIC    | 19.91  | 16.68           | 11.48            | 18.43       |               |                                                                    |
| CV.1se | 8.8    | 6.95            | 4.91             | 41.65       | 5.07          | sd( $\mu$ )/ $\sigma = 0.5$<br>$\rho = 0$<br><i>Oracle : 100</i>   |
| CV.min | 47.95  | 28.46           | 9.81             | 139.88      | 22.67         |                                                                    |
| AICc   | 57.78  | 39.55           | 38.41            | 105.62      |               |                                                                    |
| AIC    | 829.25 | 820.55          | 811.29           | 314.29      |               |                                                                    |
| BIC    | 8.95   | 7.28            | 3.27             | 10.28       |               |                                                                    |
| CV.1se | 8.74   | 6.96            | 4.82             | 45.44       | 4.89          | sd( $\mu$ )/ $\sigma = 0.5$<br>$\rho = 0.5$<br><i>Oracle : 100</i> |
| CV.min | 50.7   | 31.3            | 9.68             | 143.2       | 20.67         |                                                                    |
| AICc   | 59.86  | 42.8            | 41.65            | 105.83      |               |                                                                    |
| AIC    | 831.69 | 823.13          | 813.1            | 319.72      |               |                                                                    |
| BIC    | 8.24   | 6.9             | 3.23             | 9.92        |               |                                                                    |
| CV.1se | 9.09   | 6.99            | 4.67             | 42.87       | 4.94          | sd( $\mu$ )/ $\sigma = 0.5$<br>$\rho = 0.9$<br><i>Oracle : 100</i> |
| CV.min | 52.97  | 32.97           | 9.71             | 136.41      | 20.61         |                                                                    |
| AICc   | 60.81  | 42.54           | 42.61            | 105.16      |               |                                                                    |
| AIC    | 827.67 | 819.49          | 808.99           | 303.88      |               |                                                                    |
| BIC    | 7.99   | 6.61            | 3.12             | 9.98        |               |                                                                    |

Table 77: **Nonzero coefficients at n=1000, binary design, sparse covariates, and decay 50.**

|        | lasso  | GL $\gamma = 1$ | GL $\gamma = 10$ | marginal AL | sparsenet MCP |                                                               |
|--------|--------|-----------------|------------------|-------------|---------------|---------------------------------------------------------------|
| CV.1se | 175.43 | 131.08          | 74.19            | 139.5       | 83.2          | $sd(\mu)/\sigma = 2$<br>$\rho = 0$<br><i>Oracle : 100</i>     |
| CV.min | 273.32 | 210.69          | 97.36            | 202.52      | 140           |                                                               |
| AICc   | 212.68 | 178.18          | 151.76           | 181.73      |               |                                                               |
| AIC    | 742.41 | 733.99          | 705              | 242.57      |               |                                                               |
| BIC    | 96.16  | 82.53           | 61.51            | 87.36       |               |                                                               |
| CV.1se | 188.41 | 140.01          | 74.22            | 147.32      | 81.29         | $sd(\mu)/\sigma = 2$<br>$\rho = 0.5$<br><i>Oracle : 100</i>   |
| CV.min | 289.76 | 221.83          | 99.21            | 213.1       | 134.08        |                                                               |
| AICc   | 219.83 | 186.01          | 157.36           | 189.56      |               |                                                               |
| AIC    | 747.09 | 739.6           | 711.53           | 257.5       |               |                                                               |
| BIC    | 96.13  | 82.15           | 61.47            | 87.16       |               |                                                               |
| CV.1se | 194.84 | 144.12          | 76.4             | 148.48      | 84.21         | $sd(\mu)/\sigma = 2$<br>$\rho = 0.9$<br><i>Oracle : 100</i>   |
| CV.min | 294.36 | 226.66          | 103.29           | 212.98      | 137.41        |                                                               |
| AICc   | 224.82 | 188.63          | 156.12           | 190.14      |               |                                                               |
| AIC    | 744.2  | 736.1           | 707.58           | 256.68      |               |                                                               |
| BIC    | 98.35  | 83.67           | 62.07            | 89.85       |               |                                                               |
| CV.1se | 92.82  | 63.09           | 33.42            | 116.47      | 61.88         | $sd(\mu)/\sigma = 1$<br>$\rho = 0$<br><i>Oracle : 100</i>     |
| CV.min | 189.27 | 129.13          | 52.46            | 199.8       | 146.01        |                                                               |
| AICc   | 156.92 | 133.8           | 177.89           | 165.06      |               |                                                               |
| AIC    | 822.82 | 812.25          | 802.46           | 349.39      |               |                                                               |
| BIC    | 27.09  | 29.39           | 12.51            | 42.5        |               |                                                               |
| CV.1se | 97.71  | 66.33           | 34.01            | 123.65      | 56.4          | $sd(\mu)/\sigma = 1$<br>$\rho = 0.5$<br><i>Oracle : 100</i>   |
| CV.min | 200.44 | 136.59          | 53.86            | 206.79      | 135.58        |                                                               |
| AICc   | 160.48 | 137.61          | 178.76           | 171.72      |               |                                                               |
| AIC    | 826.98 | 816.89          | 806.41           | 366.05      |               |                                                               |
| BIC    | 20.09  | 26.68           | 12.12            | 40.6        |               |                                                               |
| CV.1se | 101.85 | 69.13           | 34.08            | 124.03      | 58.66         | $sd(\mu)/\sigma = 1$<br>$\rho = 0.9$<br><i>Oracle : 100</i>   |
| CV.min | 203.2  | 142.1           | 54.92            | 203.48      | 139.78        |                                                               |
| AICc   | 161.88 | 139.63          | 170.51           | 170.88      |               |                                                               |
| AIC    | 824.07 | 813.66          | 803.39           | 359.09      |               |                                                               |
| BIC    | 18.13  | 25.73           | 11.32            | 40.25       |               |                                                               |
| CV.1se | 5.14   | 1.94            | 0.32             | 75.75       | 3.89          | $sd(\mu)/\sigma = 0.5$<br>$\rho = 0$<br><i>Oracle : 100</i>   |
| CV.min | 68.01  | 23.77           | 3.63             | 181.1       | 65.78         |                                                               |
| AICc   | 73.78  | 78.02           | 58.36            | 134.92      |               |                                                               |
| AIC    | 873.17 | 862.19          | 872.83           | 460.57      |               |                                                               |
| BIC    | 0.42   | 0.54            | 0                | 2.88        |               |                                                               |
| CV.1se | 3.73   | 1.4             | 0.22             | 79.67       | 2.83          | $sd(\mu)/\sigma = 0.5$<br>$\rho = 0.5$<br><i>Oracle : 100</i> |
| CV.min | 62.83  | 22.25           | 2.8              | 184.49      | 60.13         |                                                               |
| AICc   | 71.13  | 76.14           | 77.37            | 136.84      |               |                                                               |
| AIC    | 874.64 | 863.95          | 873.95           | 476.73      |               |                                                               |
| BIC    | 0.32   | 0.31            | 0                | 2.06        |               |                                                               |
| CV.1se | 3.54   | 1.18            | 0.2              | 75.93       | 2.03          | $sd(\mu)/\sigma = 0.5$<br>$\rho = 0.9$<br><i>Oracle : 100</i> |
| CV.min | 64.88  | 23.58           | 3.04             | 178.4       | 60.99         |                                                               |
| AICc   | 72.02  | 78.07           | 69.22            | 134.39      |               |                                                               |
| AIC    | 872.43 | 861.77          | 871.47           | 470.23      |               |                                                               |
| BIC    | 0.32   | 0.36            | 0                | 2           |               |                                                               |

Table 78: **Nonzero coefficients at n=1000, binary design, sparse covariates, and decay 100.**

|        | lasso  | GL $\gamma = 1$ | GL $\gamma = 10$ | marginal AL | sparsenet MCP |                                                                    |
|--------|--------|-----------------|------------------|-------------|---------------|--------------------------------------------------------------------|
| CV.1se | 215.4  | 157.96          | 101.28           | 173.47      | 101.32        | sd( $\mu$ )/ $\sigma = 2$<br>$\rho = 0$<br><i>Oracle : 100</i>     |
| CV.min | 309.72 | 229.02          | 117.87           | 231.36      | 130.33        |                                                                    |
| AICc   | 237.05 | 193.49          | 141.41           | 206.89      |               |                                                                    |
| AIC    | 768.26 | 758.21          | 735.21           | 298.73      |               |                                                                    |
| BIC    | 134.84 | 115.96          | 90.19            | 124.51      |               |                                                                    |
| CV.1se | 231.16 | 169.53          | 103.44           | 185.96      | 103.13        | sd( $\mu$ )/ $\sigma = 2$<br>$\rho = 0.5$<br><i>Oracle : 100</i>   |
| CV.min | 328.69 | 242.85          | 120.28           | 246.37      | 127.02        |                                                                    |
| AICc   | 249.65 | 202.7           | 145.94           | 218.38      |               |                                                                    |
| AIC    | 772.58 | 763.08          | 739.67           | 313.69      |               |                                                                    |
| BIC    | 139.79 | 120.25          | 92.05            | 128.5       |               |                                                                    |
| CV.1se | 237.69 | 173.96          | 105.44           | 187.29      | 107.38        | sd( $\mu$ )/ $\sigma = 2$<br>$\rho = 0.9$<br><i>Oracle : 100</i>   |
| CV.min | 332.46 | 247.39          | 124.42           | 246.92      | 131.25        |                                                                    |
| AICc   | 251.99 | 205.79          | 146.88           | 219.8       |               |                                                                    |
| AIC    | 769.94 | 760.51          | 737.48           | 314.21      |               |                                                                    |
| BIC    | 141.89 | 122.11          | 92.61            | 130.1       |               |                                                                    |
| CV.1se | 119.45 | 79.11           | 35.38            | 148.1       | 108.55        | sd( $\mu$ )/ $\sigma = 1$<br>$\rho = 0$<br><i>Oracle : 100</i>     |
| CV.min | 228.04 | 153.54          | 64.93            | 229.09      | 220.12        |                                                                    |
| AICc   | 181.78 | 160.48          | 201.95           | 189         |               |                                                                    |
| AIC    | 839.55 | 827.34          | 826              | 408.19      |               |                                                                    |
| BIC    | 1.65   | 10.06           | 1.15             | 31.29       |               |                                                                    |
| CV.1se | 123.87 | 82.92           | 34.86            | 155.56      | 107.96        | sd( $\mu$ )/ $\sigma = 1$<br>$\rho = 0.5$<br><i>Oracle : 100</i>   |
| CV.min | 239.32 | 163.23          | 67.23            | 237.8       | 225.34        |                                                                    |
| AICc   | 186.12 | 166.46          | 203.71           | 194.05      |               |                                                                    |
| AIC    | 842.41 | 831.19          | 827.35           | 420.37      |               |                                                                    |
| BIC    | 1.13   | 5.19            | 0.59             | 22.8        |               |                                                                    |
| CV.1se | 129.01 | 85.92           | 34.2             | 155.18      | 109.89        | sd( $\mu$ )/ $\sigma = 1$<br>$\rho = 0.9$<br><i>Oracle : 100</i>   |
| CV.min | 243.13 | 167.63          | 66.68            | 233.79      | 226.19        |                                                                    |
| AICc   | 187.36 | 169.38          | 204.68           | 196.69      |               |                                                                    |
| AIC    | 840    | 828.47          | 824.8            | 420.29      |               |                                                                    |
| BIC    | 0.91   | 4.39            | 0.79             | 19.91       |               |                                                                    |
| CV.1se | 2.57   | 0.43            | 0.05             | 80.47       | 2.17          | sd( $\mu$ )/ $\sigma = 0.5$<br>$\rho = 0$<br><i>Oracle : 100</i>   |
| CV.min | 59.44  | 10.68           | 1.48             | 189.97      | 58.18         |                                                                    |
| AICc   | 66.39  | 89.24           | 43.93            | 139.2       |               |                                                                    |
| AIC    | 879.35 | 868.09          | 884.4            | 496.45      |               |                                                                    |
| BIC    | 0.15   | 0.08            | 0                | 1.19        |               |                                                                    |
| CV.1se | 1.88   | 0.18            | 0.02             | 82.72       | 1.39          | sd( $\mu$ )/ $\sigma = 0.5$<br>$\rho = 0.5$<br><i>Oracle : 100</i> |
| CV.min | 50.8   | 9.75            | 1.01             | 191.88      | 50.04         |                                                                    |
| AICc   | 60.04  | 85.66           | 54.66            | 140.12      |               |                                                                    |
| AIC    | 880.25 | 869.19          | 884.55           | 509.2       |               |                                                                    |
| BIC    | 0.12   | 0.09            | 0                | 0.96        |               |                                                                    |
| CV.1se | 1.44   | 0.17            | 0.02             | 79.43       | 0.86          | sd( $\mu$ )/ $\sigma = 0.5$<br>$\rho = 0.9$<br><i>Oracle : 100</i> |
| CV.min | 51.62  | 9.15            | 1.13             | 188.07      | 49.41         |                                                                    |
| AICc   | 62.19  | 85.73           | 48.2             | 137.21      |               |                                                                    |
| AIC    | 878    | 866.48          | 882.09           | 502.58      |               |                                                                    |
| BIC    | 0.12   | 0.08            | 0                | 0.91        |               |                                                                    |

Table 79: **Nonzero coefficients at n=1000, binary design, sparse covariates, and decay 200.**

|        | lasso  | GL $\gamma = 1$ | GL $\gamma = 10$ | marginal AL | sparsenet MCP |                                                                    |
|--------|--------|-----------------|------------------|-------------|---------------|--------------------------------------------------------------------|
| CV.1se | 223.47 | 154.74          | 105.41           | 181.12      | 102.87        | sd( $\mu$ )/ $\sigma = 2$<br>$\rho = 0$<br><i>Oracle : 100</i>     |
| CV.min | 315.85 | 217.6           | 114.37           | 235.72      | 115.77        |                                                                    |
| AICc   | 240.77 | 186.24          | 117.42           | 211.66      |               |                                                                    |
| AIC    | 778.83 | 767.52          | 748.55           | 316.97      |               |                                                                    |
| BIC    | 151.59 | 123.47          | 98.71            | 142.11      |               |                                                                    |
| CV.1se | 240.16 | 164.98          | 106.23           | 194.44      | 103.18        | sd( $\mu$ )/ $\sigma = 2$<br>$\rho = 0.5$<br><i>Oracle : 100</i>   |
| CV.min | 335.75 | 230.41          | 115.06           | 250.41      | 115.2         |                                                                    |
| AICc   | 253.11 | 194.89          | 117.28           | 224.09      |               |                                                                    |
| AIC    | 782.5  | 771.91          | 752.25           | 331.54      |               |                                                                    |
| BIC    | 158.26 | 128.53          | 99.79            | 149.37      |               |                                                                    |
| CV.1se | 246.41 | 169.61          | 108.95           | 197.57      | 107.39        | sd( $\mu$ )/ $\sigma = 2$<br>$\rho = 0.9$<br><i>Oracle : 100</i>   |
| CV.min | 338.95 | 235.48          | 119.59           | 252.67      | 117.65        |                                                                    |
| AICc   | 256.47 | 198             | 118.41           | 227.23      |               |                                                                    |
| AIC    | 779.85 | 768.82          | 749.55           | 334.42      |               |                                                                    |
| BIC    | 161.59 | 131.61          | 100.9            | 152.24      |               |                                                                    |
| CV.1se | 129.48 | 81.48           | 29.41            | 161.11      | 126.39        | sd( $\mu$ )/ $\sigma = 1$<br>$\rho = 0$<br><i>Oracle : 100</i>     |
| CV.min | 242.28 | 157.77          | 63.88            | 241.7       | 243.14        |                                                                    |
| AICc   | 189.39 | 169.39          | 217.21           | 199.46      |               |                                                                    |
| AIC    | 845.87 | 832.2           | 835.41           | 431.73      |               |                                                                    |
| BIC    | 0.45   | 3.82            | 0.76             | 16.61       |               |                                                                    |
| CV.1se | 134.01 | 85.2            | 25.91            | 169.33      | 128.57        | sd( $\mu$ )/ $\sigma = 1$<br>$\rho = 0.5$<br><i>Oracle : 100</i>   |
| CV.min | 253.93 | 168.79          | 62.37            | 250.16      | 251.34        |                                                                    |
| AICc   | 196.41 | 178.87          | 213.42           | 206.23      |               |                                                                    |
| AIC    | 848.39 | 835.64          | 836.52           | 443.43      |               |                                                                    |
| BIC    | 0.37   | 1.65            | 0.13             | 10.15       |               |                                                                    |
| CV.1se | 139.37 | 87.46           | 24.14            | 167.83      | 130.85        | sd( $\mu$ )/ $\sigma = 1$<br>$\rho = 0.9$<br><i>Oracle : 100</i>   |
| CV.min | 257.87 | 171.74          | 60.9             | 246.36      | 254.61        |                                                                    |
| AICc   | 197.94 | 180.1           | 215.47           | 206.57      |               |                                                                    |
| AIC    | 845.72 | 833.26          | 834.34           | 441.87      |               |                                                                    |
| BIC    | 0.39   | 1.11            | 0.23             | 8.32        |               |                                                                    |
| CV.1se | 1.88   | 0.22            | 0.02             | 81.93       | 1.62          | sd( $\mu$ )/ $\sigma = 0.5$<br>$\rho = 0$<br><i>Oracle : 100</i>   |
| CV.min | 54.98  | 6.41            | 0.92             | 193.49      | 54.94         |                                                                    |
| AICc   | 63.37  | 99.88           | 29.39            | 139.5       |               |                                                                    |
| AIC    | 881.36 | 869.27          | 889.4            | 509.19      |               |                                                                    |
| BIC    | 0.11   | 0.03            | 0                | 0.86        |               |                                                                    |
| CV.1se | 1.43   | 0.09            | 0.01             | 82.83       | 1.02          | sd( $\mu$ )/ $\sigma = 0.5$<br>$\rho = 0.5$<br><i>Oracle : 100</i> |
| CV.min | 44.69  | 5.2             | 0.7              | 193.75      | 44.46         |                                                                    |
| AICc   | 54.93  | 95.46           | 36.01            | 139.94      |               |                                                                    |
| AIC    | 882.37 | 870.91          | 889.49           | 520.33      |               |                                                                    |
| BIC    | 0.09   | 0.03            | 0                | 0.76        |               |                                                                    |
| CV.1se | 0.94   | 0.05            | 0.01             | 79.93       | 0.68          | sd( $\mu$ )/ $\sigma = 0.5$<br>$\rho = 0.9$<br><i>Oracle : 100</i> |
| CV.min | 45.09  | 5.03            | 0.74             | 191.22      | 42.83         |                                                                    |
| AICc   | 56.35  | 95.23           | 32.88            | 137.59      |               |                                                                    |
| AIC    | 879.67 | 867.66          | 886.91           | 511.9       |               |                                                                    |
| BIC    | 0.09   | 0.04            | 0                | 0.71        |               |                                                                    |

Table 80: Nonzero coefficients at n=1000, continuous design, sparse covariates, and decay 10.

|        | lasso  | GL $\gamma = 1$ | GL $\gamma = 10$ | marginal AL | sparsenet MCP |                                                                    |
|--------|--------|-----------------|------------------|-------------|---------------|--------------------------------------------------------------------|
| CV.1se | 40.34  | 30.68           | 20.09            | 29.14       | 18.79         | sd( $\mu$ )/ $\sigma = 2$<br>$\rho = 0$<br><i>Oracle : 100</i>     |
| CV.min | 103.9  | 78.64           | 31.79            | 53.91       | 32.54         |                                                                    |
| AICc   | 98.48  | 71.33           | 25.64            | 50.68       |               |                                                                    |
| AIC    | 610.08 | 607.83          | 580.37           | 52.03       |               |                                                                    |
| BIC    | 30.11  | 25.35           | 18.6             | 25.49       |               |                                                                    |
| CV.1se | 86.05  | 59.04           | 23.03            | 35.08       | 19            | sd( $\mu$ )/ $\sigma = 2$<br>$\rho = 0.5$<br><i>Oracle : 100</i>   |
| CV.min | 173.55 | 132.87          | 51.75            | 45.39       | 30.05         |                                                                    |
| AICc   | 146.39 | 111.64          | 45.26            | 45.15       |               |                                                                    |
| AIC    | 539.81 | 539.49          | 515.13           | 45.25       |               |                                                                    |
| BIC    | 39.2   | 29.42           | 16.74            | 34.1        |               |                                                                    |
| CV.1se | 150.05 | 120.12          | 60.24            | 11.46       | 32.46         | sd( $\mu$ )/ $\sigma = 2$<br>$\rho = 0.9$<br><i>Oracle : 100</i>   |
| CV.min | 226.55 | 191.32          | 98.49            | 12.56       | 57.98         |                                                                    |
| AICc   | 190.69 | 161.01          | 82.82            | 12.56       |               |                                                                    |
| AIC    | 243.07 | 239.05          | 197.73           | 12.56       |               |                                                                    |
| BIC    | 70.99  | 57.34           | 20.8             | 12.47       |               |                                                                    |
| CV.1se | 23.98  | 18.16           | 12.49            | 38.71       | 11.98         | sd( $\mu$ )/ $\sigma = 1$<br>$\rho = 0$<br><i>Oracle : 100</i>     |
| CV.min | 77.49  | 53.9            | 19.15            | 117.83      | 25.81         |                                                                    |
| AICc   | 78.84  | 49.84           | 13.8             | 97.65       |               |                                                                    |
| AIC    | 741.49 | 735.39          | 707.33           | 154.27      |               |                                                                    |
| BIC    | 19.86  | 15.71           | 10.18            | 18.01       |               |                                                                    |
| CV.1se | 45.77  | 31.55           | 12.77            | 65.81       | 12.38         | sd( $\mu$ )/ $\sigma = 1$<br>$\rho = 0.5$<br><i>Oracle : 100</i>   |
| CV.min | 125.9  | 93.66           | 27.99            | 125.2       | 23.83         |                                                                    |
| AICc   | 115.2  | 82.06           | 24.12            | 112.61      |               |                                                                    |
| AIC    | 688.82 | 683.95          | 653.03           | 129.67      |               |                                                                    |
| BIC    | 19.82  | 15.2            | 8.11             | 24.07       |               |                                                                    |
| CV.1se | 62.14  | 64.79           | 38.31            | 15.38       | 24.64         | sd( $\mu$ )/ $\sigma = 1$<br>$\rho = 0.9$<br><i>Oracle : 100</i>   |
| CV.min | 158.84 | 137.59          | 66.38            | 26.63       | 50.69         |                                                                    |
| AICc   | 141.65 | 114.91          | 50.47            | 26.13       |               |                                                                    |
| AIC    | 377.46 | 388.23          | 358.14           | 26.22       |               |                                                                    |
| BIC    | 1.36   | 1.04            | 1.11             | 15.95       |               |                                                                    |
| CV.1se | 8.78   | 6.97            | 4.92             | 44.77       | 5.07          | sd( $\mu$ )/ $\sigma = 0.5$<br>$\rho = 0$<br><i>Oracle : 100</i>   |
| CV.min | 48.42  | 28.79           | 9.73             | 141.49      | 21.83         |                                                                    |
| AICc   | 56.7   | 24.13           | 4.05             | 106.25      |               |                                                                    |
| AIC    | 829.74 | 821.32          | 811.77           | 313.14      |               |                                                                    |
| BIC    | 8.98   | 6.22            | 1.64             | 10.12       |               |                                                                    |
| CV.1se | 4.33   | 5.42            | 3.21             | 52.59       | 5.19          | sd( $\mu$ )/ $\sigma = 0.5$<br>$\rho = 0.5$<br><i>Oracle : 100</i> |
| CV.min | 56.94  | 45.93           | 11.07            | 139.54      | 16.12         |                                                                    |
| AICc   | 67.06  | 38.82           | 2.93             | 114.56      |               |                                                                    |
| AIC    | 798.16 | 790.33          | 773.25           | 252.9       |               |                                                                    |
| BIC    | 2.46   | 1.78            | 0.96             | 3.45        |               |                                                                    |
| CV.1se | 1.01   | 1               | 1                | 12.07       | 1.21          | sd( $\mu$ )/ $\sigma = 0.5$<br>$\rho = 0.9$<br><i>Oracle : 100</i> |
| CV.min | 6.85   | 5.05            | 2.4              | 56.99       | 10.11         |                                                                    |
| AICc   | 12.81  | 1.83            | 1                | 55.68       |               |                                                                    |
| AIC    | 535.11 | 553.6           | 520.08           | 64.94       |               |                                                                    |
| BIC    | 1.36   | 1.03            | 1                | 2.67        |               |                                                                    |



Table 81: Nonzero coefficients at n=1000, continuous design, sparse covariates, and decay 50.

|        | lasso  | GL $\gamma = 1$ | GL $\gamma = 10$ | marginal AL | sparsenet MCP |                                                                    |
|--------|--------|-----------------|------------------|-------------|---------------|--------------------------------------------------------------------|
| CV.1se | 177.38 | 131.7           | 74.1             | 139.2       | 83.5          | sd( $\mu$ )/ $\sigma = 2$<br>$\rho = 0$<br><i>Oracle : 100</i>     |
| CV.min | 275.72 | 210.8           | 97.57            | 203.17      | 139.13        |                                                                    |
| AICc   | 212.26 | 171.93          | 108.71           | 182.62      |               |                                                                    |
| AIC    | 741.02 | 732.57          | 703.83           | 242.07      |               |                                                                    |
| BIC    | 95.76  | 78.13           | 54.98            | 87.86       |               |                                                                    |
| CV.1se | 284.92 | 221.99          | 104.54           | 200.39      | 91.86         | sd( $\mu$ )/ $\sigma = 2$<br>$\rho = 0.5$<br><i>Oracle : 100</i>   |
| CV.min | 390.74 | 318.95          | 154.52           | 253.92      | 139.8         |                                                                    |
| AICc   | 283.84 | 240.7           | 155.72           | 232.46      |               |                                                                    |
| AIC    | 719.34 | 711.54          | 681.23           | 267.94      |               |                                                                    |
| BIC    | 62.29  | 84.45           | 62.49            | 91.74       |               |                                                                    |
| CV.1se | 342.59 | 289.9           | 175.27           | 48.48       | 139.78        | sd( $\mu$ )/ $\sigma = 2$<br>$\rho = 0.9$<br><i>Oracle : 100</i>   |
| CV.min | 426.59 | 380.66          | 224.62           | 62.76       | 179.84        |                                                                    |
| AICc   | 323.91 | 291.1           | 206.31           | 62.23       |               |                                                                    |
| AIC    | 432.07 | 415.11          | 370.19           | 62.42       |               |                                                                    |
| BIC    | 1.55   | 1.06            | 4.77             | 34.2        |               |                                                                    |
| CV.1se | 93.83  | 63.48           | 33.21            | 117.33      | 61.69         | sd( $\mu$ )/ $\sigma = 1$<br>$\rho = 0$<br><i>Oracle : 100</i>     |
| CV.min | 191.52 | 129.04          | 51.84            | 200.59      | 145.7         |                                                                    |
| AICc   | 156.08 | 118.76          | 84.3             | 163.3       |               |                                                                    |
| AIC    | 822.66 | 811.93          | 802.09           | 348.76      |               |                                                                    |
| BIC    | 26.51  | 23.2            | 1.76             | 42.37       |               |                                                                    |
| CV.1se | 116.23 | 101.52          | 43.51            | 150.2       | 57.17         | sd( $\mu$ )/ $\sigma = 1$<br>$\rho = 0.5$<br><i>Oracle : 100</i>   |
| CV.min | 248.97 | 201.84          | 79.21            | 228.54      | 105.01        |                                                                    |
| AICc   | 188.55 | 164.27          | 129.46           | 198.09      |               |                                                                    |
| AIC    | 811.45 | 802.63          | 786.48           | 377.81      |               |                                                                    |
| BIC    | 1.34   | 0.96            | 0.16             | 4.54        |               |                                                                    |
| CV.1se | 16.24  | 49.35           | 37.22            | 47.73       | 92.25         | sd( $\mu$ )/ $\sigma = 1$<br>$\rho = 0.9$<br><i>Oracle : 100</i>   |
| CV.min | 110.88 | 164.45          | 92.11            | 90.68       | 141.73        |                                                                    |
| AICc   | 77.11  | 65.1            | 63.49            | 88.14       |               |                                                                    |
| AIC    | 564.08 | 550.45          | 509.2            | 94.01       |               |                                                                    |
| BIC    | 1.46   | 1.06            | 1                | 3.43        |               |                                                                    |
| CV.1se | 5.04   | 1.84            | 0.27             | 78.71       | 3.9           | sd( $\mu$ )/ $\sigma = 0.5$<br>$\rho = 0$<br><i>Oracle : 100</i>   |
| CV.min | 67.7   | 25              | 3.78             | 182.97      | 65.96         |                                                                    |
| AICc   | 73.06  | 29.17           | 0.23             | 135.27      |               |                                                                    |
| AIC    | 872.57 | 861.49          | 872.49           | 464.17      |               |                                                                    |
| BIC    | 0.42   | 0.1             | 0                | 2.77        |               |                                                                    |
| CV.1se | 0.13   | 0.06            | 0.02             | 43.35       | 0.49          | sd( $\mu$ )/ $\sigma = 0.5$<br>$\rho = 0.5$<br><i>Oracle : 100</i> |
| CV.min | 14.69  | 7.95            | 0.88             | 147.92      | 13.99         |                                                                    |
| AICc   | 30.49  | 3.35            | 0.77             | 112.34      |               |                                                                    |
| AIC    | 864.61 | 855.17          | 859.36           | 476.25      |               |                                                                    |
| BIC    | 0.17   | 0.07            | 0                | 0.7         |               |                                                                    |
| CV.1se | 0.17   | 0.19            | 0.28             | 3.68        | 0.45          | sd( $\mu$ )/ $\sigma = 0.5$<br>$\rho = 0.9$<br><i>Oracle : 100</i> |
| CV.min | 7.69   | 4.71            | 1.41             | 51.18       | 2.9           |                                                                    |
| AICc   | 12.68  | 1.51            | 0.94             | 56.79       |               |                                                                    |
| AIC    | 692.69 | 673.84          | 660.71           | 101.17      |               |                                                                    |
| BIC    | 1.3    | 1.01            | 0.74             | 1.5         |               |                                                                    |

Table 82: **Nonzero coefficients at n=1000, continuous design, sparse covariates, and decay 100.**

|        | lasso  | GL $\gamma = 1$ | GL $\gamma = 10$ | marginal AL | sparsenet MCP |                                                               |
|--------|--------|-----------------|------------------|-------------|---------------|---------------------------------------------------------------|
| CV.1se | 216.7  | 158.99          | 101.3            | 173.7       | 101.8         | $sd(\mu)/\sigma = 2$<br>$\rho = 0$<br><i>Oracle : 100</i>     |
| CV.min | 312.77 | 230.16          | 117.75           | 232.7       | 132.73        |                                                               |
| AICc   | 238.55 | 186.96          | 107.23           | 207.88      |               |                                                               |
| AIC    | 767.5  | 757.71          | 734.48           | 297.7       |               |                                                               |
| BIC    | 136.65 | 112.43          | 87.7             | 125.42      |               |                                                               |
| CV.1se | 351.92 | 280.15          | 152.5            | 261.44      | 138.66        | $sd(\mu)/\sigma = 2$<br>$\rho = 0.5$<br><i>Oracle : 100</i>   |
| CV.min | 448.81 | 363.11          | 190.88           | 328         | 170.95        |                                                               |
| AICc   | 332.16 | 280.87          | 159.41           | 287.02      |               |                                                               |
| AIC    | 760.54 | 751.67          | 726.14           | 361.97      |               |                                                               |
| BIC    | 1.19   | 6.74            | 120.59           | 12.88       |               |                                                               |
| CV.1se | 409.63 | 353.68          | 229.43           | 68.54       | 198.23        | $sd(\mu)/\sigma = 2$<br>$\rho = 0.9$<br><i>Oracle : 100</i>   |
| CV.min | 490.29 | 435.49          | 269.98           | 105.81      | 229.09        |                                                               |
| AICc   | 373.98 | 338.52          | 227.04           | 102.44      |               |                                                               |
| AIC    | 496.49 | 474.8           | 427.14           | 106.07      |               |                                                               |
| BIC    | 2.07   | 1.34            | 2.69             | 5.12        |               |                                                               |
| CV.1se | 121.2  | 79.38           | 35.15            | 149.49      | 107.9         | $sd(\mu)/\sigma = 1$<br>$\rho = 0$<br><i>Oracle : 100</i>     |
| CV.min | 229.92 | 153.4           | 64.98            | 231.73      | 221.09        |                                                               |
| AICc   | 180.82 | 144.1           | 136.48           | 189.01      |               |                                                               |
| AIC    | 838.97 | 826.44          | 824.64           | 408.23      |               |                                                               |
| BIC    | 1.65   | 2.86            | 0.11             | 31.63       |               |                                                               |
| CV.1se | 75.16  | 77.87           | 8.87             | 160.02      | 77.52         | $sd(\mu)/\sigma = 1$<br>$\rho = 0.5$<br><i>Oracle : 100</i>   |
| CV.min | 252.28 | 210.01          | 41.08            | 248.98      | 158.93        |                                                               |
| AICc   | 175.12 | 184.13          | 177.3            | 207.76      |               |                                                               |
| AIC    | 836.61 | 826.58          | 817.29           | 462.59      |               |                                                               |
| BIC    | 0.38   | 0.2             | 0                | 1.65        |               |                                                               |
| CV.1se | 1.15   | 3.51            | 0.81             | 32.58       | 21.48         | $sd(\mu)/\sigma = 1$<br>$\rho = 0.9$<br><i>Oracle : 100</i>   |
| CV.min | 19.35  | 34.54           | 3.75             | 97.19       | 72.07         |                                                               |
| AICc   | 21.41  | 6.15            | 13.14            | 101.16      |               |                                                               |
| AIC    | 626.79 | 608.57          | 575.17           | 142.13      |               |                                                               |
| BIC    | 1.67   | 1.15            | 0.99             | 1.86        |               |                                                               |
| CV.1se | 2.53   | 0.45            | 0.06             | 83.46       | 1.85          | $sd(\mu)/\sigma = 0.5$<br>$\rho = 0$<br><i>Oracle : 100</i>   |
| CV.min | 58.87  | 10.96           | 1.34             | 192.27      | 60.1          |                                                               |
| AICc   | 67.63  | 21.93           | 1.15             | 139.02      |               |                                                               |
| AIC    | 878.63 | 867.27          | 884.18           | 495.35      |               |                                                               |
| BIC    | 0.16   | 0.01            | 16.91            | 1.21        |               |                                                               |
| CV.1se | 0.01   | 0               | 0                | 36.25       | 0.46          | $sd(\mu)/\sigma = 0.5$<br>$\rho = 0.5$<br><i>Oracle : 100</i> |
| CV.min | 10.17  | 3.22            | 0.36             | 140.85      | 10.11         |                                                               |
| AICc   | 22.94  | 0.87            | 0.43             | 105.6       |               |                                                               |
| AIC    | 870.74 | 859.63          | 869.23           | 510.63      |               |                                                               |
| BIC    | 0.06   | 0.02            | 0                | 0.38        |               |                                                               |
| CV.1se | 0.04   | 0.05            | 0.08             | 1.22        | 0.44          | $sd(\mu)/\sigma = 0.5$<br>$\rho = 0.9$<br><i>Oracle : 100</i> |
| CV.min | 8.2    | 4.73            | 1.42             | 36.78       | 4.99          |                                                               |
| AICc   | 14.12  | 1.34            | 0.47             | 40.6        |               |                                                               |
| AIC    | 736.73 | 715.86          | 715.33           | 93.56       |               |                                                               |
| BIC    | 0.88   | 0.66            | 0.14             | 1.32        |               |                                                               |

Table 83: **Nonzero coefficients at n=1000, continuous design, sparse covariates, and decay 200.**

|        | lasso  | GL $\gamma = 1$ | GL $\gamma = 10$ | marginal AL | sparsenet MCP |                                                               |
|--------|--------|-----------------|------------------|-------------|---------------|---------------------------------------------------------------|
| CV.1se | 224.63 | 155.19          | 105.5            | 181.42      | 102.74        | $sd(\mu)/\sigma = 2$<br>$\rho = 0$<br><i>Oracle : 100</i>     |
| CV.min | 318.5  | 217.92          | 114.43           | 236.28      | 116.28        |                                                               |
| AICc   | 241.9  | 179.16          | 101.41           | 213.12      |               |                                                               |
| AIC    | 777.82 | 767.04          | 748.05           | 317.5       |               |                                                               |
| BIC    | 150.79 | 120.13          | 98.02            | 141.96      |               |                                                               |
| CV.1se | 368.76 | 279.52          | 144.89           | 287.33      | 113.1         | $sd(\mu)/\sigma = 2$<br>$\rho = 0.5$<br><i>Oracle : 100</i>   |
| CV.min | 460.6  | 352.01          | 163.65           | 357.34      | 126.15        |                                                               |
| AICc   | 341.81 | 272.18          | 128.97           | 309.03      |               |                                                               |
| AIC    | 776.77 | 767.31          | 744.78           | 401.13      |               |                                                               |
| BIC    | 0.52   | 15.34           | 123.67           | 3.36        |               |                                                               |
| CV.1se | 434.56 | 363.17          | 226.51           | 86.17       | 186.96        | $sd(\mu)/\sigma = 2$<br>$\rho = 0.9$<br><i>Oracle : 100</i>   |
| CV.min | 518.82 | 437.77          | 250.23           | 144.27      | 211.49        |                                                               |
| AICc   | 391.51 | 338.85          | 201.81           | 138.83      |               |                                                               |
| AIC    | 533.99 | 511.1           | 466.14           | 149.71      |               |                                                               |
| BIC    | 2.86   | 1.9             | 51.45            | 2.99        |               |                                                               |
| CV.1se | 132.12 | 82.35           | 29.31            | 162.1       | 127.28        | $sd(\mu)/\sigma = 1$<br>$\rho = 0$<br><i>Oracle : 100</i>     |
| CV.min | 244.8  | 158.63          | 64.23            | 242.68      | 244.45        |                                                               |
| AICc   | 192.86 | 152.89          | 145.25           | 200.17      |               |                                                               |
| AIC    | 845.23 | 831.63          | 834.85           | 433.28      |               |                                                               |
| BIC    | 0.51   | 0.42            | 0.06             | 16          |               |                                                               |
| CV.1se | 39.08  | 39.47           | 0.84             | 157.52      | 43.03         | $sd(\mu)/\sigma = 1$<br>$\rho = 0.5$<br><i>Oracle : 100</i>   |
| CV.min | 217.3  | 167.02          | 6.82             | 252.89      | 178.42        |                                                               |
| AICc   | 140.57 | 184.71          | 200.87           | 206.66      |               |                                                               |
| AIC    | 844.4  | 833.66          | 828.74           | 492.97      |               |                                                               |
| BIC    | 0.17   | 0.07            | 0                | 1.01        |               |                                                               |
| CV.1se | 0.76   | 0.77            | 0.52             | 17.07       | 2.19          | $sd(\mu)/\sigma = 1$<br>$\rho = 0.9$<br><i>Oracle : 100</i>   |
| CV.min | 15.64  | 13.74           | 2.38             | 88.07       | 15.8          |                                                               |
| AICc   | 20.44  | 4.15            | 9.33             | 95.41       |               |                                                               |
| AIC    | 663.89 | 643.78          | 617.88           | 192.64      |               |                                                               |
| BIC    | 2.14   | 1.41            | 0.87             | 2.52        |               |                                                               |
| CV.1se | 1.82   | 0.18            | 0.03             | 84.71       | 1.36          | $sd(\mu)/\sigma = 0.5$<br>$\rho = 0$<br><i>Oracle : 100</i>   |
| CV.min | 54.45  | 6.51            | 1.01             | 194.39      | 54.99         |                                                               |
| AICc   | 63.21  | 17.4            | 0                | 139.85      |               |                                                               |
| AIC    | 880.57 | 868.78          | 888.79           | 509.84      |               |                                                               |
| BIC    | 0.1    | 0               | 171.44           | 0.9         |               |                                                               |
| CV.1se | 0.01   | 0.01            | 0                | 34.1        | 0.45          | $sd(\mu)/\sigma = 0.5$<br>$\rho = 0.5$<br><i>Oracle : 100</i> |
| CV.min | 9.14   | 2.15            | 0.33             | 138.25      | 9.14          |                                                               |
| AICc   | 20.94  | 0.44            | 0                | 102.34      |               |                                                               |
| AIC    | 871.94 | 859.89          | 873.45           | 519.26      |               |                                                               |
| BIC    | 0.06   | 0.01            | 0                | 0.29        |               |                                                               |
| CV.1se | 0.03   | 0.03            | 0.04             | 1.03        | 0.45          | $sd(\mu)/\sigma = 0.5$<br>$\rho = 0.9$<br><i>Oracle : 100</i> |
| CV.min | 8.37   | 4.41            | 1.28             | 32.84       | 6             |                                                               |
| AICc   | 14.04  | 1.13            | 0.16             | 35.73       |               |                                                               |
| AIC    | 757.48 | 735.05          | 742.32           | 103.11      |               |                                                               |
| BIC    | 0.55   | 0.36            | 0.03             | 1.11        |               |                                                               |

Table 84: Nonzero coefficients at n=100, binary design, dense covariates, and decay 10.

|        | lasso  | GL $\gamma = 1$ | GL $\gamma = 10$ | marginal AL | sparsenet MCP |                                                                     |
|--------|--------|-----------------|------------------|-------------|---------------|---------------------------------------------------------------------|
| CV.1se | 10.27  | 6.8             | 2.15             | 40.73       | 7.02          | sd( $\mu$ )/ $\sigma = 2$<br>$\rho = 0$<br><i>Oracle</i> : 21.25    |
| CV.min | 46.71  | 25.28           | 5.6              | 70.51       | 34.93         |                                                                     |
| AICc   | 20.3   | 15.31           | 49.62            | 26.53       |               |                                                                     |
| AIC    | 109.15 | 96.42           | 74.5             | 86.93       |               |                                                                     |
| BIC    | 107.58 | 94.95           | 73.11            | 80.43       |               |                                                                     |
| CV.1se | 8.49   | 5.59            | 1.91             | 41.74       | 5.52          | sd( $\mu$ )/ $\sigma = 2$<br>$\rho = 0.5$<br><i>Oracle</i> : 20.95  |
| CV.min | 41.33  | 23.91           | 5.15             | 72.56       | 28.29         |                                                                     |
| AICc   | 18.79  | 14.63           | 50.08            | 26.91       |               |                                                                     |
| AIC    | 110.09 | 97.3            | 75.5             | 88.14       |               |                                                                     |
| BIC    | 108.36 | 95.99           | 74.14            | 83.13       |               |                                                                     |
| CV.1se | 7.83   | 5.05            | 1.68             | 40.55       | 5.59          | sd( $\mu$ )/ $\sigma = 2$<br>$\rho = 0.9$<br><i>Oracle</i> : 20.71  |
| CV.min | 40.17  | 22.04           | 4.69             | 70.46       | 26.4          |                                                                     |
| AICc   | 18.22  | 13.82           | 49.99            | 26.66       |               |                                                                     |
| AIC    | 109.97 | 97.37           | 75.89            | 88.06       |               |                                                                     |
| BIC    | 108.41 | 95.98           | 74.52            | 82.55       |               |                                                                     |
| CV.1se | 1.81   | 0.77            | 0.25             | 45.13       | 1.53          | sd( $\mu$ )/ $\sigma = 1$<br>$\rho = 0$<br><i>Oracle</i> : 14.52    |
| CV.min | 19.6   | 6.41            | 1.06             | 78.51       | 17.37         |                                                                     |
| AICc   | 10.38  | 12.39           | 52.62            | 23.34       |               |                                                                     |
| AIC    | 112.87 | 97.64           | 75.83            | 93.21       |               |                                                                     |
| BIC    | 111.57 | 95.91           | 73.99            | 92.05       |               |                                                                     |
| CV.1se | 1.2    | 0.53            | 0.23             | 47.02       | 1.04          | sd( $\mu$ )/ $\sigma = 1$<br>$\rho = 0.5$<br><i>Oracle</i> : 14.39  |
| CV.min | 16.82  | 5.74            | 0.95             | 79.98       | 14.55         |                                                                     |
| AICc   | 10.03  | 10.77           | 52.56            | 23.15       |               |                                                                     |
| AIC    | 113.35 | 98.15           | 76.48            | 93.57       |               |                                                                     |
| BIC    | 112.01 | 96.85           | 74.6             | 92.26       |               |                                                                     |
| CV.1se | 1.36   | 0.77            | 0.26             | 44.47       | 1.26          | sd( $\mu$ )/ $\sigma = 1$<br>$\rho = 0.9$<br><i>Oracle</i> : 14.05  |
| CV.min | 16.81  | 6.04            | 1.02             | 77.34       | 14.41         |                                                                     |
| AICc   | 9.84   | 9.51            | 51.91            | 23.51       |               |                                                                     |
| AIC    | 113.02 | 98.35           | 76.9             | 93.64       |               |                                                                     |
| BIC    | 111.6  | 96.94           | 74.91            | 92.05       |               |                                                                     |
| CV.1se | 0.27   | 0.05            | 0.02             | 48.27       | 0.55          | sd( $\mu$ )/ $\sigma = 0.5$<br>$\rho = 0$<br><i>Oracle</i> : 7.82   |
| CV.min | 7.44   | 1.22            | 0.23             | 81.9        | 7.52          |                                                                     |
| AICc   | 5.64   | 30.06           | 55.3             | 20.57       |               |                                                                     |
| AIC    | 115.24 | 95.81           | 73.4             | 96.25       |               |                                                                     |
| BIC    | 114.03 | 94.19           | 71.41            | 95.64       |               |                                                                     |
| CV.1se | 0.29   | 0.1             | 0.03             | 48.6        | 0.5           | sd( $\mu$ )/ $\sigma = 0.5$<br>$\rho = 0.5$<br><i>Oracle</i> : 7.96 |
| CV.min | 7.52   | 1.27            | 0.26             | 83.11       | 7.38          |                                                                     |
| AICc   | 5.61   | 26.75           | 54.85            | 21.48       |               |                                                                     |
| AIC    | 115.25 | 96.35           | 74.18            | 96.43       |               |                                                                     |
| BIC    | 113.81 | 94.91           | 72.11            | 95.78       |               |                                                                     |
| CV.1se | 0.38   | 0.1             | 0.04             | 46.61       | 0.51          | sd( $\mu$ )/ $\sigma = 0.5$<br>$\rho = 0.9$<br><i>Oracle</i> : 7.57 |
| CV.min | 7.59   | 1.24            | 0.25             | 80.87       | 7.52          |                                                                     |
| AICc   | 5.84   | 25.25           | 55.49            | 21.38       |               |                                                                     |
| AIC    | 115.14 | 96.36           | 74.23            | 96.08       |               |                                                                     |
| BIC    | 114    | 94.73           | 72.25            | 95.28       |               |                                                                     |

Table 85: Nonzero coefficients at n=100, binary design, dense covariates, and decay 50.

|        | lasso  | GL $\gamma = 1$ | GL $\gamma = 10$ | marginal AL | sparsenet MCP |                                                                     |
|--------|--------|-----------------|------------------|-------------|---------------|---------------------------------------------------------------------|
| CV.1se | 1.34   | 0.2             | 0.07             | 53.16       | 1.06          | sd( $\mu$ )/ $\sigma = 2$<br>$\rho = 0$<br><i>Oracle : 56.85</i>    |
| CV.min | 17.15  | 2.34            | 0.45             | 85.15       | 18.97         |                                                                     |
| AICc   | 8.05   | 37.06           | 55.48            | 22.98       |               |                                                                     |
| AIC    | 113.89 | 93.58           | 71.13            | 95.05       |               |                                                                     |
| BIC    | 112.8  | 91.86           | 69.5             | 94.36       |               |                                                                     |
| CV.1se | 0.63   | 0.18            | 0.06             | 51.6        | 0.71          | sd( $\mu$ )/ $\sigma = 2$<br>$\rho = 0.5$<br><i>Oracle : 56.18</i>  |
| CV.min | 15.5   | 2.1             | 0.36             | 84.16       | 15.71         |                                                                     |
| AICc   | 7.89   | 35.41           | 55.16            | 23.4        |               |                                                                     |
| AIC    | 114.46 | 94.27           | 72.03            | 95.35       |               |                                                                     |
| BIC    | 113.28 | 92.48           | 70.15            | 94.78       |               |                                                                     |
| CV.1se | 0.84   | 0.24            | 0.05             | 49.94       | 0.74          | sd( $\mu$ )/ $\sigma = 2$<br>$\rho = 0.9$<br><i>Oracle : 56.48</i>  |
| CV.min | 14.96  | 1.93            | 0.37             | 82.39       | 13.87         |                                                                     |
| AICc   | 7.28   | 33.16           | 55.39            | 22.38       |               |                                                                     |
| AIC    | 114.37 | 94.58           | 72.16            | 95.4        |               |                                                                     |
| BIC    | 113.12 | 92.84           | 70.35            | 94.57       |               |                                                                     |
| CV.1se | 0.53   | 0.06            | 0.03             | 50.93       | 0.68          | sd( $\mu$ )/ $\sigma = 1$<br>$\rho = 0$<br><i>Oracle : 31.69</i>    |
| CV.min | 10.62  | 1.05            | 0.24             | 84.51       | 9.83          |                                                                     |
| AICc   | 6.39   | 42.84           | 56.81            | 22.2        |               |                                                                     |
| AIC    | 114.97 | 92.18           | 69.79            | 96.23       |               |                                                                     |
| BIC    | 113.77 | 90.33           | 68.38            | 95.62       |               |                                                                     |
| CV.1se | 0.27   | 0.05            | 0.03             | 48.97       | 0.54          | sd( $\mu$ )/ $\sigma = 1$<br>$\rho = 0.5$<br><i>Oracle : 31.41</i>  |
| CV.min | 9.01   | 0.9             | 0.19             | 84.28       | 8.51          |                                                                     |
| AICc   | 6.15   | 42.39           | 56.52            | 22.08       |               |                                                                     |
| AIC    | 115.07 | 93.07           | 70.49            | 96.3        |               |                                                                     |
| BIC    | 113.93 | 91.11           | 68.92            | 95.77       |               |                                                                     |
| CV.1se | 0.42   | 0.06            | 0.04             | 48.42       | 0.53          | sd( $\mu$ )/ $\sigma = 1$<br>$\rho = 0.9$<br><i>Oracle : 31</i>     |
| CV.min | 9.6    | 0.98            | 0.26             | 81.83       | 9.33          |                                                                     |
| AICc   | 5.76   | 41.57           | 56.68            | 21          |               |                                                                     |
| AIC    | 114.81 | 92.9            | 70.53            | 95.92       |               |                                                                     |
| BIC    | 113.55 | 90.83           | 69.07            | 95.31       |               |                                                                     |
| CV.1se | 0.24   | 0.02            | 0.04             | 49.59       | 0.45          | sd( $\mu$ )/ $\sigma = 0.5$<br>$\rho = 0$<br><i>Oracle : 8.54</i>   |
| CV.min | 6.35   | 0.36            | 0.19             | 84.57       | 6.02          |                                                                     |
| AICc   | 4.92   | 48.6            | 58.18            | 20.96       |               |                                                                     |
| AIC    | 115.61 | 88.57           | 66.96            | 96.64       |               |                                                                     |
| BIC    | 114.23 | 86.37           | 66.14            | 96.13       |               |                                                                     |
| CV.1se | 0.05   | 0.03            | 0.01             | 49.54       | 0.44          | sd( $\mu$ )/ $\sigma = 0.5$<br>$\rho = 0.5$<br><i>Oracle : 8.87</i> |
| CV.min | 5.77   | 0.4             | 0.17             | 83.22       | 5.16          |                                                                     |
| AICc   | 4.98   | 48.24           | 58.18            | 20.31       |               |                                                                     |
| AIC    | 115.49 | 89.44           | 67.61            | 96.86       |               |                                                                     |
| BIC    | 114.27 | 87.47           | 66.68            | 96.26       |               |                                                                     |
| CV.1se | 0.18   | 0.02            | 0.02             | 46.56       | 0.39          | sd( $\mu$ )/ $\sigma = 0.5$<br>$\rho = 0.9$<br><i>Oracle : 8.11</i> |
| CV.min | 6.85   | 0.36            | 0.17             | 80.99       | 6.62          |                                                                     |
| AICc   | 5.24   | 47.74           | 58.33            | 20.57       |               |                                                                     |
| AIC    | 115.34 | 89.16           | 67.7             | 96.66       |               |                                                                     |
| BIC    | 114.07 | 86.87           | 66.81            | 96.04       |               |                                                                     |

Table 86: Nonzero coefficients at n=100, binary design, dense covariates, and decay 100.

|        | lasso  | GL $\gamma = 1$ | GL $\gamma = 10$ | marginal AL | sparsenet MCP |                                                                     |
|--------|--------|-----------------|------------------|-------------|---------------|---------------------------------------------------------------------|
| CV.1se | 1.11   | 0.1             | 0.05             | 53.43       | 0.91          | sd( $\mu$ )/ $\sigma = 2$<br>$\rho = 0$<br><i>Oracle</i> : 78.12    |
| CV.min | 14.36  | 1               | 0.29             | 84.81       | 16.14         |                                                                     |
| AICc   | 6.5    | 45.45           | 56.62            | 22.86       |               |                                                                     |
| AIC    | 114.51 | 90.73           | 68.48            | 95.75       |               |                                                                     |
| BIC    | 113.45 | 88.83           | 67.4             | 95.12       |               |                                                                     |
| CV.1se | 0.56   | 0.1             | 0.04             | 52.87       | 0.6           | sd( $\mu$ )/ $\sigma = 2$<br>$\rho = 0.5$<br><i>Oracle</i> : 77.79  |
| CV.min | 12.21  | 0.9             | 0.26             | 85.13       | 11.88         |                                                                     |
| AICc   | 6.6    | 44.09           | 56.53            | 22.42       |               |                                                                     |
| AIC    | 114.74 | 91.78           | 69.18            | 96.19       |               |                                                                     |
| BIC    | 113.45 | 89.75           | 67.9             | 95.57       |               |                                                                     |
| CV.1se | 0.64   | 0.09            | 0.04             | 50.46       | 0.54          | sd( $\mu$ )/ $\sigma = 2$<br>$\rho = 0.9$<br><i>Oracle</i> : 77.15  |
| CV.min | 12.02  | 0.88            | 0.24             | 83.31       | 12.45         |                                                                     |
| AICc   | 6.38   | 43.96           | 56.72            | 21.71       |               |                                                                     |
| AIC    | 114.76 | 91.76           | 69.19            | 95.71       |               |                                                                     |
| BIC    | 113.53 | 89.77           | 67.95            | 95.1        |               |                                                                     |
| CV.1se | 0.41   | 0.05            | 0.02             | 51.4        | 0.57          | sd( $\mu$ )/ $\sigma = 1$<br>$\rho = 0$<br><i>Oracle</i> : 38.01    |
| CV.min | 9.65   | 0.48            | 0.2              | 84.61       | 9.83          |                                                                     |
| AICc   | 5.79   | 47.88           | 57.85            | 21.65       |               |                                                                     |
| AIC    | 115.06 | 88.95           | 67.26            | 96.52       |               |                                                                     |
| BIC    | 113.92 | 86.81           | 66.33            | 95.9        |               |                                                                     |
| CV.1se | 0.34   | 0.05            | 0.03             | 49.83       | 0.46          | sd( $\mu$ )/ $\sigma = 1$<br>$\rho = 0.5$<br><i>Oracle</i> : 36.88  |
| CV.min | 7.97   | 0.57            | 0.16             | 83.96       | 8.55          |                                                                     |
| AICc   | 5.34   | 47.05           | 57.51            | 21.68       |               |                                                                     |
| AIC    | 115.16 | 89.52           | 67.85            | 96.67       |               |                                                                     |
| BIC    | 114.03 | 87.41           | 67               | 95.98       |               |                                                                     |
| CV.1se | 0.39   | 0.03            | 0.03             | 47.22       | 0.55          | sd( $\mu$ )/ $\sigma = 1$<br>$\rho = 0.9$<br><i>Oracle</i> : 37.12  |
| CV.min | 8.78   | 0.56            | 0.23             | 81.79       | 8.64          |                                                                     |
| AICc   | 5.61   | 46.79           | 57.81            | 21.13       |               |                                                                     |
| AIC    | 115.04 | 89.73           | 68.06            | 96.25       |               |                                                                     |
| BIC    | 113.7  | 87.74           | 67.02            | 95.4        |               |                                                                     |
| CV.1se | 0.2    | 0.02            | 0.02             | 49.77       | 0.4           | sd( $\mu$ )/ $\sigma = 0.5$<br>$\rho = 0$<br><i>Oracle</i> : 6.56   |
| CV.min | 5.81   | 0.28            | 0.13             | 84.14       | 5.79          |                                                                     |
| AICc   | 4.63   | 50.71           | 59.3             | 20.93       |               |                                                                     |
| AIC    | 115.53 | 84.84           | 65.39            | 96.71       |               |                                                                     |
| BIC    | 114.32 | 82.58           | 64.67            | 96.11       |               |                                                                     |
| CV.1se | 0.13   | 0.03            | 0.01             | 49.55       | 0.47          | sd( $\mu$ )/ $\sigma = 0.5$<br>$\rho = 0.5$<br><i>Oracle</i> : 6.85 |
| CV.min | 5.85   | 0.31            | 0.14             | 83.82       | 5.62          |                                                                     |
| AICc   | 4.95   | 50.11           | 58.96            | 20.32       |               |                                                                     |
| AIC    | 115.3  | 85.71           | 65.69            | 96.73       |               |                                                                     |
| BIC    | 114.2  | 83.42           | 64.91            | 96.1        |               |                                                                     |
| CV.1se | 0.21   | 0.01            | 0.03             | 46.17       | 0.43          | sd( $\mu$ )/ $\sigma = 0.5$<br>$\rho = 0.9$<br><i>Oracle</i> : 6.4  |
| CV.min | 6.48   | 0.31            | 0.15             | 81.45       | 6.37          |                                                                     |
| AICc   | 5.47   | 49.45           | 59.13            | 20.78       |               |                                                                     |
| AIC    | 115.3  | 85.99           | 65.81            | 96.51       |               |                                                                     |
| BIC    | 113.86 | 83.58           | 65.16            | 95.7        |               |                                                                     |

Table 87: Nonzero coefficients at n=100, binary design, dense covariates, and decay 200.

|        | lasso  | GL $\gamma = 1$ | GL $\gamma = 10$ | marginal AL | sparsenet MCP |                                                                       |
|--------|--------|-----------------|------------------|-------------|---------------|-----------------------------------------------------------------------|
| CV.1se | 0.71   | 0.07            | 0.04             | 53.85       | 0.87          | $\text{sd}(\mu)/\sigma = 2$<br>$\rho = 0$<br><i>Oracle</i> : 91.18    |
| CV.min | 12.91  | 0.69            | 0.25             | 85.31       | 14.1          |                                                                       |
| AICc   | 6.23   | 48.41           | 58.08            | 22.78       |               |                                                                       |
| AIC    | 114.65 | 87.76           | 66.3             | 96.1        |               |                                                                       |
| BIC    | 113.48 | 85.63           | 65.6             | 95.42       |               |                                                                       |
| CV.1se | 0.45   | 0.04            | 0.04             | 52.25       | 0.53          | $\text{sd}(\mu)/\sigma = 2$<br>$\rho = 0.5$<br><i>Oracle</i> : 90.76  |
| CV.min | 10.77  | 0.55            | 0.25             | 85.36       | 10.92         |                                                                       |
| AICc   | 6.18   | 47.28           | 57.96            | 22.01       |               |                                                                       |
| AIC    | 114.85 | 88.49           | 66.77            | 96.21       |               |                                                                       |
| BIC    | 113.71 | 86.45           | 65.87            | 95.66       |               |                                                                       |
| CV.1se | 0.54   | 0.06            | 0.03             | 50.49       | 0.56          | $\text{sd}(\mu)/\sigma = 2$<br>$\rho = 0.9$<br><i>Oracle</i> : 90.33  |
| CV.min | 9.88   | 0.6             | 0.24             | 83.82       | 10.41         |                                                                       |
| AICc   | 6.39   | 48.25           | 57.97            | 21.66       |               |                                                                       |
| AIC    | 114.67 | 88.17           | 66.93            | 95.97       |               |                                                                       |
| BIC    | 113.42 | 85.92           | 66.01            | 95.25       |               |                                                                       |
| CV.1se | 0.47   | 0.03            | 0.02             | 51.32       | 0.48          | $\text{sd}(\mu)/\sigma = 1$<br>$\rho = 0$<br><i>Oracle</i> : 41.56    |
| CV.min | 9.07   | 0.39            | 0.21             | 85.17       | 8.91          |                                                                       |
| AICc   | 5.45   | 49.11           | 58.71            | 21.6        |               |                                                                       |
| AIC    | 115.24 | 85.63           | 65.62            | 96.59       |               |                                                                       |
| BIC    | 114.08 | 83.57           | 64.94            | 96.04       |               |                                                                       |
| CV.1se | 0.4    | 0.04            | 0.03             | 50.67       | 0.45          | $\text{sd}(\mu)/\sigma = 1$<br>$\rho = 0.5$<br><i>Oracle</i> : 41.26  |
| CV.min | 7.8    | 0.49            | 0.18             | 84.22       | 7.69          |                                                                       |
| AICc   | 5.32   | 49.29           | 58.67            | 21.02       |               |                                                                       |
| AIC    | 115.28 | 86.49           | 65.74            | 96.41       |               |                                                                       |
| BIC    | 114.05 | 84.25           | 65.01            | 95.97       |               |                                                                       |
| CV.1se | 0.39   | 0.02            | 0.02             | 48.12       | 0.54          | $\text{sd}(\mu)/\sigma = 1$<br>$\rho = 0.9$<br><i>Oracle</i> : 40.75  |
| CV.min | 8.81   | 0.48            | 0.2              | 82.08       | 8.01          |                                                                       |
| AICc   | 5.9    | 49.58           | 58.71            | 21.5        |               |                                                                       |
| AIC    | 114.88 | 86.34           | 66.1             | 96.19       |               |                                                                       |
| BIC    | 113.58 | 83.96           | 65.35            | 95.67       |               |                                                                       |
| CV.1se | 0.18   | 0.02            | 0.02             | 50.14       | 0.42          | $\text{sd}(\mu)/\sigma = 0.5$<br>$\rho = 0$<br><i>Oracle</i> : 5.09   |
| CV.min | 5.9    | 0.25            | 0.17             | 83.88       | 5.82          |                                                                       |
| AICc   | 4.73   | 52.14           | 60.03            | 20.23       |               |                                                                       |
| AIC    | 115.4  | 81.59           | 64.13            | 96.8        |               |                                                                       |
| BIC    | 114.27 | 79.24           | 63.4             | 96.05       |               |                                                                       |
| CV.1se | 0.19   | 0.03            | 0.01             | 49.14       | 0.47          | $\text{sd}(\mu)/\sigma = 0.5$<br>$\rho = 0.5$<br><i>Oracle</i> : 5.6  |
| CV.min | 6.07   | 0.26            | 0.13             | 83.68       | 5.63          |                                                                       |
| AICc   | 4.82   | 51.51           | 59.88            | 20.47       |               |                                                                       |
| AIC    | 115.43 | 82.47           | 64.43            | 96.7        |               |                                                                       |
| BIC    | 114.34 | 79.92           | 63.69            | 96.1        |               |                                                                       |
| CV.1se | 0.18   | 0.02            | 0.01             | 46.55       | 0.44          | $\text{sd}(\mu)/\sigma = 0.5$<br>$\rho = 0.9$<br><i>Oracle</i> : 5.19 |
| CV.min | 6.6    | 0.28            | 0.13             | 81.7        | 6.85          |                                                                       |
| AICc   | 5.19   | 51.64           | 60.11            | 20.74       |               |                                                                       |
| AIC    | 115.45 | 82.32           | 64.49            | 96.47       |               |                                                                       |
| BIC    | 114.16 | 79.52           | 63.78            | 95.85       |               |                                                                       |

Table 88: Nonzero coefficients at  $n=100$ , continuous design, dense covariates, and decay 10.

|        | lasso  | GL $\gamma = 1$ | GL $\gamma = 10$ | marginal AL | sparsenet MCP |                                                                       |
|--------|--------|-----------------|------------------|-------------|---------------|-----------------------------------------------------------------------|
| CV.1se | 9.38   | 5.78            | 2.06             | 39.46       | 6.53          | $\text{sd}(\mu)/\sigma = 2$<br>$\rho = 0$<br><i>Oracle</i> : 20.75    |
| CV.min | 42.21  | 23.33           | 5.17             | 69.95       | 33            |                                                                       |
| AICc   | 19.98  | 8.06            | 49.38            | 26.11       |               |                                                                       |
| AIC    | 109.18 | 96.34           | 74.39            | 86.92       |               |                                                                       |
| BIC    | 107.66 | 94.99           | 72.97            | 79.99       |               |                                                                       |
| CV.1se | 1.31   | 1.14            | 0.63             | 37.72       | 1.69          | $\text{sd}(\mu)/\sigma = 2$<br>$\rho = 0.5$<br><i>Oracle</i> : 20.43  |
| CV.min | 15.97  | 10.34           | 1.86             | 70.04       | 10.04         |                                                                       |
| AICc   | 9.96   | 2.15            | 39.05            | 21.17       |               |                                                                       |
| AIC    | 110.04 | 99.51           | 79.33            | 88.83       |               |                                                                       |
| BIC    | 108.73 | 98.46           | 78.26            | 76.73       |               |                                                                       |
| CV.1se | 1.37   | 1.21            | 1.03             | 12.61       | 1.04          | $\text{sd}(\mu)/\sigma = 2$<br>$\rho = 0.9$<br><i>Oracle</i> : 18.27  |
| CV.min | 8.59   | 5.65            | 1.7              | 34.12       | 3.12          |                                                                       |
| AICc   | 7.53   | 1.51            | 1.07             | 19.16       |               |                                                                       |
| AIC    | 103.15 | 92.8            | 73.37            | 55.58       |               |                                                                       |
| BIC    | 83.55  | 83.5            | 72.64            | 3.55        |               |                                                                       |
| CV.1se | 1.56   | 0.77            | 0.25             | 45.1        | 1.08          | $\text{sd}(\mu)/\sigma = 1$<br>$\rho = 0$<br><i>Oracle</i> : 14.43    |
| CV.min | 16.67  | 5.95            | 1.02             | 78.33       | 16.1          |                                                                       |
| AICc   | 10.94  | 1.75            | 53.61            | 22.91       |               |                                                                       |
| AIC    | 113.1  | 97.55           | 75.58            | 93.22       |               |                                                                       |
| BIC    | 111.76 | 96.18           | 74               | 91.6        |               |                                                                       |
| CV.1se | 0.51   | 0.34            | 0.19             | 39.43       | 0.61          | $\text{sd}(\mu)/\sigma = 1$<br>$\rho = 0.5$<br><i>Oracle</i> : 14.19  |
| CV.min | 9.68   | 3.89            | 0.7              | 72.96       | 7.51          |                                                                       |
| AICc   | 7.04   | 0.87            | 51.96            | 20.33       |               |                                                                       |
| AIC    | 113.8  | 100.8           | 80.71            | 93.59       |               |                                                                       |
| BIC    | 112.15 | 99.36           | 78.76            | 90.59       |               |                                                                       |
| CV.1se | 1.1    | 0.96            | 0.9              | 6.97        | 0.95          | $\text{sd}(\mu)/\sigma = 1$<br>$\rho = 0.9$<br><i>Oracle</i> : 11.62  |
| CV.min | 9      | 5.41            | 1.56             | 25.81       | 3.19          |                                                                       |
| AICc   | 7.81   | 1.47            | 1.78             | 13.76       |               |                                                                       |
| AIC    | 107.62 | 95.04           | 76               | 74.16       |               |                                                                       |
| BIC    | 105.62 | 94.71           | 75.15            | 4.18        |               |                                                                       |
| CV.1se | 0.34   | 0.08            | 0.03             | 48.1        | 0.51          | $\text{sd}(\mu)/\sigma = 0.5$<br>$\rho = 0$<br><i>Oracle</i> : 7.87   |
| CV.min | 6.94   | 1.3             | 0.23             | 81.96       | 6.86          |                                                                       |
| AICc   | 5.64   | 7.83            | 56.31            | 20.66       |               |                                                                       |
| AIC    | 115.31 | 95.89           | 73.5             | 96.41       |               |                                                                       |
| BIC    | 114.09 | 94.57           | 71.52            | 95.81       |               |                                                                       |
| CV.1se | 0.09   | 0.07            | 0.02             | 40.22       | 0.43          | $\text{sd}(\mu)/\sigma = 0.5$<br>$\rho = 0.5$<br><i>Oracle</i> : 7.65 |
| CV.min | 5.87   | 1.58            | 0.28             | 74.78       | 5.28          |                                                                       |
| AICc   | 5.28   | 0.63            | 55.06            | 20.2        |               |                                                                       |
| AIC    | 115.46 | 99.36           | 78.25            | 96.17       |               |                                                                       |
| BIC    | 113.7  | 97.86           | 76.13            | 95.21       |               |                                                                       |
| CV.1se | 0.35   | 0.26            | 0.17             | 8.47        | 0.51          | $\text{sd}(\mu)/\sigma = 0.5$<br>$\rho = 0.9$<br><i>Oracle</i> : 5.53 |
| CV.min | 6.83   | 3.64            | 0.81             | 28.53       | 5.08          |                                                                       |
| AICc   | 6.83   | 0.59            | 38.76            | 14.49       |               |                                                                       |
| AIC    | 114.01 | 97.56           | 79.03            | 90.1        |               |                                                                       |
| BIC    | 113.06 | 97.15           | 78.01            | 33.12       |               |                                                                       |



Table 89: Nonzero coefficients at n=100, continuous design, dense covariates, and decay 50.

|        | lasso  | GL $\gamma = 1$ | GL $\gamma = 10$ | marginal AL | sparsenet MCP |                                                                       |
|--------|--------|-----------------|------------------|-------------|---------------|-----------------------------------------------------------------------|
| CV.1se | 1.3    | 0.26            | 0.08             | 52          | 1.09          | $\text{sd}(\mu)/\sigma = 2$<br>$\rho = 0$<br><i>Oracle : 57.19</i>    |
| CV.min | 16.99  | 2.22            | 0.38             | 83.98       | 18.43         |                                                                       |
| AICc   | 8.48   | 14.96           | 56.34            | 23.95       |               |                                                                       |
| AIC    | 113.97 | 93.61           | 70.8             | 94.96       |               |                                                                       |
| BIC    | 112.86 | 92.01           | 69.16            | 94.19       |               |                                                                       |
| CV.1se | 0.21   | 0.09            | 0.03             | 41.73       | 0.53          | $\text{sd}(\mu)/\sigma = 2$<br>$\rho = 0.5$<br><i>Oracle : 56.98</i>  |
| CV.min | 7.5    | 1.72            | 0.24             | 76.39       | 7.17          |                                                                       |
| AICc   | 5.7    | 1.12            | 55.6             | 20.13       |               |                                                                       |
| AIC    | 115.07 | 98.4            | 77               | 96.2        |               |                                                                       |
| BIC    | 113.5  | 96.83           | 74.87            | 95.46       |               |                                                                       |
| CV.1se | 0.51   | 0.45            | 0.31             | 7.67        | 0.61          | $\text{sd}(\mu)/\sigma = 2$<br>$\rho = 0.9$<br><i>Oracle : 54.95</i>  |
| CV.min | 7.71   | 4.6             | 1.2              | 27.5        | 5.56          |                                                                       |
| AICc   | 7.44   | 0.88            | 25.08            | 14.94       |               |                                                                       |
| AIC    | 112.43 | 96.94           | 78.26            | 87.64       |               |                                                                       |
| BIC    | 111.37 | 96.52           | 77.03            | 24.07       |               |                                                                       |
| CV.1se | 0.43   | 0.07            | 0.02             | 51.02       | 0.54          | $\text{sd}(\mu)/\sigma = 1$<br>$\rho = 0$<br><i>Oracle : 30.65</i>    |
| CV.min | 10.48  | 0.92            | 0.29             | 84.44       | 10.15         |                                                                       |
| AICc   | 6.5    | 26.93           | 57.5             | 21.65       |               |                                                                       |
| AIC    | 114.66 | 92.06           | 69.78            | 96.07       |               |                                                                       |
| BIC    | 113.67 | 90.44           | 68.37            | 95.48       |               |                                                                       |
| CV.1se | 0.21   | 0.06            | 0.02             | 42.44       | 0.57          | $\text{sd}(\mu)/\sigma = 1$<br>$\rho = 0.5$<br><i>Oracle : 30.42</i>  |
| CV.min | 5.87   | 1.18            | 0.21             | 76.85       | 6.16          |                                                                       |
| AICc   | 5.05   | 3.51            | 56.35            | 19.82       |               |                                                                       |
| AIC    | 115.47 | 96.49           | 74.99            | 96.32       |               |                                                                       |
| BIC    | 113.77 | 94.61           | 72.98            | 95.56       |               |                                                                       |
| CV.1se | 0.3    | 0.23            | 0.11             | 7.81        | 0.41          | $\text{sd}(\mu)/\sigma = 1$<br>$\rho = 0.9$<br><i>Oracle : 27.66</i>  |
| CV.min | 5.86   | 3.2             | 0.67             | 28.37       | 5.21          |                                                                       |
| AICc   | 6.04   | 0.46            | 51.2             | 14.45       |               |                                                                       |
| AIC    | 114.45 | 97.04           | 78.89            | 91.88       |               |                                                                       |
| BIC    | 113.37 | 96.51           | 77.61            | 42.4        |               |                                                                       |
| CV.1se | 0.3    | 0.04            | 0.03             | 48.78       | 0.43          | $\text{sd}(\mu)/\sigma = 0.5$<br>$\rho = 0$<br><i>Oracle : 8.65</i>   |
| CV.min | 6.8    | 0.38            | 0.17             | 83.46       | 6.23          |                                                                       |
| AICc   | 5.14   | 46.46           | 59.19            | 20.55       |               |                                                                       |
| AIC    | 115.51 | 88.58           | 66.99            | 96.71       |               |                                                                       |
| BIC    | 114.39 | 86.71           | 65.95            | 96.09       |               |                                                                       |
| CV.1se | 0.22   | 0.03            | 0.02             | 39.8        | 0.37          | $\text{sd}(\mu)/\sigma = 0.5$<br>$\rho = 0.5$<br><i>Oracle : 8.5</i>  |
| CV.min | 5.6    | 0.6             | 0.19             | 74.69       | 5.09          |                                                                       |
| AICc   | 4.62   | 21.05           | 58.6             | 19.88       |               |                                                                       |
| AIC    | 115.61 | 93              | 71.18            | 96.54       |               |                                                                       |
| BIC    | 114.2  | 91.07           | 69.67            | 95.76       |               |                                                                       |
| CV.1se | 0.16   | 0.06            | 0.03             | 7.94        | 0.4           | $\text{sd}(\mu)/\sigma = 0.5$<br>$\rho = 0.9$<br><i>Oracle : 7.26</i> |
| CV.min | 4.34   | 1.46            | 0.25             | 28.76       | 3.8           |                                                                       |
| AICc   | 4.41   | 0.23            | 62.79            | 14.46       |               |                                                                       |
| AIC    | 116.02 | 94.45           | 77.16            | 94.19       |               |                                                                       |
| BIC    | 114.99 | 93.78           | 75.88            | 58.47       |               |                                                                       |

Table 90: Nonzero coefficients at n=100, continuous design, dense covariates, and decay 100.

|        | lasso  | GL $\gamma = 1$ | GL $\gamma = 10$ | marginal AL | sparsenet MCP |                                                                       |
|--------|--------|-----------------|------------------|-------------|---------------|-----------------------------------------------------------------------|
| CV.1se | 0.67   | 0.06            | 0.04             | 52.6        | 0.76          | $\text{sd}(\mu)/\sigma = 2$<br>$\rho = 0$<br><i>Oracle : 77.53</i>    |
| CV.min | 13.65  | 0.82            | 0.27             | 85.39       | 13.84         |                                                                       |
| AICc   | 7.11   | 34.13           | 57.96            | 22.79       |               |                                                                       |
| AIC    | 114.54 | 90.7            | 68.26            | 95.72       |               |                                                                       |
| BIC    | 113.41 | 88.92           | 67.22            | 95.01       |               |                                                                       |
| CV.1se | 0.22   | 0.09            | 0.02             | 41.74       | 0.41          | $\text{sd}(\mu)/\sigma = 2$<br>$\rho = 0.5$<br><i>Oracle : 77.53</i>  |
| CV.min | 6.41   | 1.13            | 0.19             | 75.51       | 6.44          |                                                                       |
| AICc   | 4.88   | 5.81            | 57.14            | 20.33       |               |                                                                       |
| AIC    | 115.39 | 96.11           | 73.86            | 96.26       |               |                                                                       |
| BIC    | 113.81 | 94.16           | 71.99            | 95.3        |               |                                                                       |
| CV.1se | 0.26   | 0.15            | 0.1              | 8.03        | 0.38          | $\text{sd}(\mu)/\sigma = 2$<br>$\rho = 0.9$<br><i>Oracle : 76.01</i>  |
| CV.min | 5.95   | 2.79            | 0.59             | 28.47       | 4.99          |                                                                       |
| AICc   | 5.97   | 0.39            | 55.53            | 15.36       |               |                                                                       |
| AIC    | 114.85 | 96.86           | 78.52            | 92.57       |               |                                                                       |
| BIC    | 113.69 | 96.21           | 77.41            | 45.46       |               |                                                                       |
| CV.1se | 0.3    | 0.05            | 0.03             | 51.64       | 0.44          | $\text{sd}(\mu)/\sigma = 1$<br>$\rho = 0$<br><i>Oracle : 37.66</i>    |
| CV.min | 8.77   | 0.44            | 0.19             | 83.44       | 8.33          |                                                                       |
| AICc   | 5.87   | 43.26           | 58.6             | 20.88       |               |                                                                       |
| AIC    | 115.09 | 89.05           | 67.39            | 96.38       |               |                                                                       |
| BIC    | 114    | 87.23           | 66.38            | 95.79       |               |                                                                       |
| CV.1se | 0.23   | 0.05            | 0.02             | 41.34       | 0.41          | $\text{sd}(\mu)/\sigma = 1$<br>$\rho = 0.5$<br><i>Oracle : 37.21</i>  |
| CV.min | 6.02   | 0.75            | 0.18             | 76.06       | 5.42          |                                                                       |
| AICc   | 4.92   | 15.17           | 58.29            | 19.95       |               |                                                                       |
| AIC    | 115.57 | 94              | 72.01            | 96.38       |               |                                                                       |
| BIC    | 113.99 | 92              | 70.37            | 95.56       |               |                                                                       |
| CV.1se | 0.13   | 0.1             | 0.03             | 7.66        | 0.35          | $\text{sd}(\mu)/\sigma = 1$<br>$\rho = 0.9$<br><i>Oracle : 34.56</i>  |
| CV.min | 4.44   | 1.82            | 0.34             | 29.36       | 4.55          |                                                                       |
| AICc   | 4.79   | 0.18            | 61.89            | 14.63       |               |                                                                       |
| AIC    | 115.68 | 95.57           | 77.87            | 93.94       |               |                                                                       |
| BIC    | 114.84 | 94.91           | 76.41            | 53.27       |               |                                                                       |
| CV.1se | 0.2    | 0.04            | 0.02             | 48.56       | 0.42          | $\text{sd}(\mu)/\sigma = 0.5$<br>$\rho = 0$<br><i>Oracle : 6.81</i>   |
| CV.min | 6.36   | 0.35            | 0.18             | 82.92       | 5.52          |                                                                       |
| AICc   | 4.9    | 50.95           | 60.05            | 20.72       |               |                                                                       |
| AIC    | 115.38 | 84.92           | 65.25            | 96.58       |               |                                                                       |
| BIC    | 114.25 | 82.92           | 64.42            | 95.97       |               |                                                                       |
| CV.1se | 0.19   | 0.02            | 0.01             | 38.82       | 0.38          | $\text{sd}(\mu)/\sigma = 0.5$<br>$\rho = 0.5$<br><i>Oracle : 6.7</i>  |
| CV.min | 5.61   | 0.41            | 0.16             | 74.96       | 5.09          |                                                                       |
| AICc   | 4.38   | 39.49           | 59.56            | 19.93       |               |                                                                       |
| AIC    | 115.44 | 89.9            | 68.67            | 96.71       |               |                                                                       |
| BIC    | 113.88 | 87.92           | 67.64            | 95.92       |               |                                                                       |
| CV.1se | 0.11   | 0.04            | 0.02             | 7.47        | 0.35          | $\text{sd}(\mu)/\sigma = 0.5$<br>$\rho = 0.9$<br><i>Oracle : 6.45</i> |
| CV.min | 3.86   | 0.96            | 0.22             | 28.61       | 3.4           |                                                                       |
| AICc   | 4.23   | 0.47            | 64.76            | 14.1        |               |                                                                       |
| AIC    | 116.35 | 91.88           | 75.83            | 94.49       |               |                                                                       |
| BIC    | 115.4  | 91.01           | 74.37            | 57.59       |               |                                                                       |

Table 91: Nonzero coefficients at n=100, continuous design, dense covariates, and decay 200.

|        | lasso  | GL $\gamma = 1$ | GL $\gamma = 10$ | marginal AL | sparsenet MCP |                                                                     |
|--------|--------|-----------------|------------------|-------------|---------------|---------------------------------------------------------------------|
| CV.1se | 0.39   | 0.05            | 0.03             | 52.15       | 0.57          | sd( $\mu$ )/ $\sigma = 2$<br>$\rho = 0$<br><i>Oracle</i> : 91.12    |
| CV.min | 12.92  | 0.49            | 0.2              | 85.14       | 12.66         |                                                                     |
| AICc   | 6.57   | 46.91           | 58.63            | 22.66       |               |                                                                     |
| AIC    | 114.72 | 87.92           | 66.31            | 96.21       |               |                                                                     |
| BIC    | 113.53 | 85.95           | 65.55            | 95.64       |               |                                                                     |
| CV.1se | 0.13   | 0.03            | 0.02             | 40.77       | 0.45          | sd( $\mu$ )/ $\sigma = 2$<br>$\rho = 0.5$<br><i>Oracle</i> : 91.12  |
| CV.min | 5.82   | 0.73            | 0.16             | 75.21       | 6.34          |                                                                     |
| AICc   | 5.16   | 20.41           | 58.08            | 20.33       |               |                                                                     |
| AIC    | 115.38 | 92.81           | 70.86            | 96.34       |               |                                                                     |
| BIC    | 113.65 | 90.95           | 69.43            | 95.54       |               |                                                                     |
| CV.1se | 0.1    | 0.09            | 0.04             | 7.82        | 0.36          | sd( $\mu$ )/ $\sigma = 2$<br>$\rho = 0.9$<br><i>Oracle</i> : 90.49  |
| CV.min | 4.77   | 1.7             | 0.32             | 29          | 4.33          |                                                                     |
| AICc   | 5.06   | 0.24            | 62.47            | 15.09       |               |                                                                     |
| AIC    | 115.24 | 94.82           | 77.08            | 93.74       |               |                                                                     |
| BIC    | 114.18 | 94.19           | 75.55            | 54.71       |               |                                                                     |
| CV.1se | 0.32   | 0.05            | 0.03             | 50.59       | 0.45          | sd( $\mu$ )/ $\sigma = 1$<br>$\rho = 0$<br><i>Oracle</i> : 41.19    |
| CV.min | 8.62   | 0.38            | 0.2              | 83.59       | 9.19          |                                                                     |
| AICc   | 5.72   | 50.11           | 59.32            | 21.22       |               |                                                                     |
| AIC    | 114.97 | 85.8            | 65.3             | 96.45       |               |                                                                     |
| BIC    | 113.95 | 83.48           | 64.34            | 95.88       |               |                                                                     |
| CV.1se | 0.19   | 0.03            | 0.01             | 40.32       | 0.36          | sd( $\mu$ )/ $\sigma = 1$<br>$\rho = 0.5$<br><i>Oracle</i> : 41.33  |
| CV.min | 5.87   | 0.44            | 0.16             | 75.03       | 5.34          |                                                                     |
| AICc   | 4.63   | 33.38           | 59.49            | 20.09       |               |                                                                     |
| AIC    | 115.52 | 90.77           | 69.29            | 96.41       |               |                                                                     |
| BIC    | 113.74 | 88.77           | 68.06            | 95.73       |               |                                                                     |
| CV.1se | 0.11   | 0.04            | 0.02             | 7.11        | 0.35          | sd( $\mu$ )/ $\sigma = 1$<br>$\rho = 0.9$<br><i>Oracle</i> : 39.92  |
| CV.min | 3.8    | 1.17            | 0.21             | 28.46       | 3.72          |                                                                     |
| AICc   | 4.36   | 0.19            | 63.75            | 14.38       |               |                                                                     |
| AIC    | 115.83 | 92.95           | 76.28            | 94.55       |               |                                                                     |
| BIC    | 114.57 | 92.2            | 74.93            | 58.59       |               |                                                                     |
| CV.1se | 0.17   | 0.04            | 0.02             | 48.98       | 0.41          | sd( $\mu$ )/ $\sigma = 0.5$<br>$\rho = 0$<br><i>Oracle</i> : 5.4    |
| CV.min | 6.19   | 0.27            | 0.17             | 83.35       | 5.93          |                                                                     |
| AICc   | 4.79   | 53.01           | 60.14            | 20.33       |               |                                                                     |
| AIC    | 115.2  | 81.51           | 64.03            | 96.69       |               |                                                                     |
| BIC    | 114.26 | 79.22           | 63.24            | 96.1        |               |                                                                     |
| CV.1se | 0.13   | 0.03            | 0.01             | 38.83       | 0.35          | sd( $\mu$ )/ $\sigma = 0.5$<br>$\rho = 0.5$<br><i>Oracle</i> : 5.46 |
| CV.min | 5.75   | 0.3             | 0.13             | 74.26       | 5.07          |                                                                     |
| AICc   | 4.8    | 48.9            | 60.57            | 19.92       |               |                                                                     |
| AIC    | 115.71 | 86.57           | 66.78            | 96.49       |               |                                                                     |
| BIC    | 113.99 | 84.52           | 65.89            | 95.65       |               |                                                                     |
| CV.1se | 0.09   | 0.02            | 0.01             | 7.04        | 0.35          | sd( $\mu$ )/ $\sigma = 0.5$<br>$\rho = 0.9$<br><i>Oracle</i> : 5.28 |
| CV.min | 3.32   | 0.77            | 0.18             | 28.68       | 3.24          |                                                                     |
| AICc   | 4.08   | 2.02            | 65.28            | 14.17       |               |                                                                     |
| AIC    | 116.06 | 89.46           | 74.33            | 94.64       |               |                                                                     |
| BIC    | 115.1  | 88.47           | 72.94            | 58.05       |               |                                                                     |

Table 92: **Nonzero coefficients at n=100, binary design, sparse covariates, and decay 10.**

|        | lasso  | GL $\gamma = 1$ | GL $\gamma = 10$ | marginal AL | sparsenet MCP |                                                                   |
|--------|--------|-----------------|------------------|-------------|---------------|-------------------------------------------------------------------|
| CV.1se | 15.26  | 10.62           | 4.77             | 34.95       | 9.61          | sd( $\mu$ )/ $\sigma = 2$<br>$\rho = 0$<br><i>Oracle : 10</i>     |
| CV.min | 51.8   | 31.21           | 10.08            | 63.72       | 26.46         |                                                                   |
| AICc   | 23.67  | 17.33           | 47.63            | 27.06       |               |                                                                   |
| AIC    | 107.57 | 95.72           | 73.55            | 83.28       |               |                                                                   |
| BIC    | 105.8  | 94.27           | 72.36            | 70.2        |               |                                                                   |
| CV.1se | 13.29  | 9.46            | 3.97             | 37.88       | 9.27          | sd( $\mu$ )/ $\sigma = 2$<br>$\rho = 0.5$<br><i>Oracle : 10</i>   |
| CV.min | 49.64  | 31.3            | 9.03             | 66.79       | 25.74         |                                                                   |
| AICc   | 22.91  | 17.68           | 48.1             | 27.48       |               |                                                                   |
| AIC    | 108.01 | 96.82           | 74.63            | 84.59       |               |                                                                   |
| BIC    | 106.54 | 95.38           | 73.26            | 75.65       |               |                                                                   |
| CV.1se | 12.9   | 9.51            | 3.65             | 37.95       | 9.13          | sd( $\mu$ )/ $\sigma = 2$<br>$\rho = 0.9$<br><i>Oracle : 10</i>   |
| CV.min | 49.97  | 31.29           | 8.63             | 66.12       | 25.43         |                                                                   |
| AICc   | 22.52  | 17.48           | 47.23            | 27.33       |               |                                                                   |
| AIC    | 108.2  | 97.07           | 75.19            | 84.9        |               |                                                                   |
| BIC    | 106.67 | 95.7            | 73.7             | 74.68       |               |                                                                   |
| CV.1se | 2.24   | 1.32            | 0.37             | 44.25       | 1.8           | sd( $\mu$ )/ $\sigma = 1$<br>$\rho = 0$<br><i>Oracle : 10</i>     |
| CV.min | 22.92  | 8.52            | 1.58             | 76.86       | 20.44         |                                                                   |
| AICc   | 12.31  | 10.3            | 52.27            | 23.99       |               |                                                                   |
| AIC    | 112.3  | 97.2            | 75.73            | 92.06       |               |                                                                   |
| BIC    | 110.82 | 95.77           | 74.01            | 90.62       |               |                                                                   |
| CV.1se | 1.87   | 0.97            | 0.4              | 45.65       | 1.34          | sd( $\mu$ )/ $\sigma = 1$<br>$\rho = 0.5$<br><i>Oracle : 10</i>   |
| CV.min | 20.75  | 8.04            | 1.29             | 78.54       | 17.03         |                                                                   |
| AICc   | 11.25  | 9.71            | 51.62            | 23.01       |               |                                                                   |
| AIC    | 112.86 | 98.02           | 76.29            | 92.45       |               |                                                                   |
| BIC    | 111.36 | 96.45           | 74.48            | 90.71       |               |                                                                   |
| CV.1se | 2.07   | 0.91            | 0.36             | 43.34       | 1.56          | sd( $\mu$ )/ $\sigma = 1$<br>$\rho = 0.9$<br><i>Oracle : 10</i>   |
| CV.min | 20.36  | 8.18            | 1.35             | 75.11       | 17.3          |                                                                   |
| AICc   | 11.44  | 9.29            | 51.97            | 23.82       |               |                                                                   |
| AIC    | 112.43 | 98.3            | 76.93            | 92.28       |               |                                                                   |
| BIC    | 110.79 | 96.77           | 75.18            | 90.7        |               |                                                                   |
| CV.1se | 0.3    | 0.05            | 0.03             | 48.68       | 0.51          | sd( $\mu$ )/ $\sigma = 0.5$<br>$\rho = 0$<br><i>Oracle : 10</i>   |
| CV.min | 7.54   | 1.43            | 0.26             | 81.23       | 7.13          |                                                                   |
| AICc   | 5.83   | 26.06           | 54.48            | 21.04       |               |                                                                   |
| AIC    | 114.97 | 96.18           | 74.3             | 96.04       |               |                                                                   |
| BIC    | 113.74 | 94.86           | 72.14            | 95.37       |               |                                                                   |
| CV.1se | 0.18   | 0.07            | 0.03             | 48.41       | 0.53          | sd( $\mu$ )/ $\sigma = 0.5$<br>$\rho = 0.5$<br><i>Oracle : 10</i> |
| CV.min | 7.54   | 1.3             | 0.27             | 82.65       | 6.92          |                                                                   |
| AICc   | 5.72   | 23.47           | 54.59            | 21.12       |               |                                                                   |
| AIC    | 114.94 | 96.9            | 74.9             | 96.2        |               |                                                                   |
| BIC    | 113.77 | 95.4            | 72.7             | 95.47       |               |                                                                   |
| CV.1se | 0.46   | 0.08            | 0.05             | 46.13       | 0.56          | sd( $\mu$ )/ $\sigma = 0.5$<br>$\rho = 0.9$<br><i>Oracle : 10</i> |
| CV.min | 7.85   | 1.39            | 0.33             | 80.29       | 7.45          |                                                                   |
| AICc   | 5.61   | 21.6            | 54.19            | 21.05       |               |                                                                   |
| AIC    | 115.04 | 96.82           | 74.9             | 96.08       |               |                                                                   |
| BIC    | 113.73 | 95.31           | 72.73            | 95.3        |               |                                                                   |

Table 93: Nonzero coefficients at n=100, binary design, sparse covariates, and decay 50.

|        | lasso  | GL $\gamma = 1$ | GL $\gamma = 10$ | marginal AL | sparsenet MCP |                                                                   |
|--------|--------|-----------------|------------------|-------------|---------------|-------------------------------------------------------------------|
| CV.1se | 16.13  | 10.09           | 2.67             | 40.53       | 14.08         | sd( $\mu$ )/ $\sigma = 2$<br>$\rho = 0$<br><i>Oracle : 10</i>     |
| CV.min | 56.2   | 31.18           | 8.11             | 68.24       | 43.57         |                                                                   |
| AICc   | 25.81  | 19.81           | 50.58            | 29.52       |               |                                                                   |
| AIC    | 109.45 | 94.74           | 71.57            | 86.29       |               |                                                                   |
| BIC    | 107.59 | 93.14           | 70.12            | 81.32       |               |                                                                   |
| CV.1se | 12.85  | 8.14            | 2.13             | 42.89       | 12.2          | sd( $\mu$ )/ $\sigma = 2$<br>$\rho = 0.5$<br><i>Oracle : 10</i>   |
| CV.min | 52.22  | 29.99           | 6.41             | 72.28       | 42.91         |                                                                   |
| AICc   | 23.98  | 21.35           | 50.61            | 30.33       |               |                                                                   |
| AIC    | 110    | 95.56           | 72.79            | 88.07       |               |                                                                   |
| BIC    | 108.16 | 93.96           | 71.14            | 85.1        |               |                                                                   |
| CV.1se | 12.45  | 7.88            | 1.6              | 43.29       | 11.43         | sd( $\mu$ )/ $\sigma = 2$<br>$\rho = 0.9$<br><i>Oracle : 10</i>   |
| CV.min | 51.72  | 28.89           | 5.45             | 72.13       | 41.13         |                                                                   |
| AICc   | 23.49  | 21.43           | 50.1             | 29.47       |               |                                                                   |
| AIC    | 109.97 | 95.94           | 73.2             | 88.1        |               |                                                                   |
| BIC    | 108.29 | 94.27           | 71.58            | 84.75       |               |                                                                   |
| CV.1se | 1.71   | 0.53            | 0.18             | 46.33       | 1.54          | sd( $\mu$ )/ $\sigma = 1$<br>$\rho = 0$<br><i>Oracle : 10</i>     |
| CV.min | 21.83  | 4.96            | 0.88             | 79.69       | 19.74         |                                                                   |
| AICc   | 11.04  | 21.93           | 53.84            | 24.64       |               |                                                                   |
| AIC    | 113.3  | 95.24           | 72.79            | 93.32       |               |                                                                   |
| BIC    | 111.88 | 93.85           | 71.27            | 92.44       |               |                                                                   |
| CV.1se | 1.35   | 0.49            | 0.15             | 48.46       | 1.05          | sd( $\mu$ )/ $\sigma = 1$<br>$\rho = 0.5$<br><i>Oracle : 10</i>   |
| CV.min | 18.23  | 4.31            | 0.76             | 80.96       | 17.35         |                                                                   |
| AICc   | 10.07  | 19.99           | 54.25            | 23.47       |               |                                                                   |
| AIC    | 113.55 | 96.07           | 74.08            | 93.89       |               |                                                                   |
| BIC    | 112.04 | 94.68           | 72.11            | 93.01       |               |                                                                   |
| CV.1se | 1.48   | 0.45            | 0.15             | 46.58       | 1.43          | sd( $\mu$ )/ $\sigma = 1$<br>$\rho = 0.9$<br><i>Oracle : 10</i>   |
| CV.min | 18.38  | 4.3             | 0.72             | 78.04       | 16.64         |                                                                   |
| AICc   | 9.91   | 18.8            | 53.45            | 23.86       |               |                                                                   |
| AIC    | 113.5  | 96.56           | 74.22            | 93.69       |               |                                                                   |
| BIC    | 112.07 | 94.87           | 72.43            | 92.51       |               |                                                                   |
| CV.1se | 0.19   | 0.05            | 0.03             | 48.89       | 0.49          | sd( $\mu$ )/ $\sigma = 0.5$<br>$\rho = 0$<br><i>Oracle : 10</i>   |
| CV.min | 7.2    | 0.78            | 0.22             | 82.38       | 7.36          |                                                                   |
| AICc   | 5.69   | 41.34           | 56.18            | 20.81       |               |                                                                   |
| AIC    | 115.05 | 93.33           | 71.05            | 96.19       |               |                                                                   |
| BIC    | 113.79 | 91.61           | 69.48            | 95.57       |               |                                                                   |
| CV.1se | 0.15   | 0.09            | 0.03             | 48.92       | 0.51          | sd( $\mu$ )/ $\sigma = 0.5$<br>$\rho = 0.5$<br><i>Oracle : 10</i> |
| CV.min | 6.87   | 0.75            | 0.22             | 83.16       | 6.76          |                                                                   |
| AICc   | 5.32   | 39.19           | 56.2             | 20.6        |               |                                                                   |
| AIC    | 115.1  | 93.86           | 71.59            | 96.49       |               |                                                                   |
| BIC    | 113.89 | 92.23           | 69.58            | 95.72       |               |                                                                   |
| CV.1se | 0.35   | 0.08            | 0.03             | 47.2        | 0.51          | sd( $\mu$ )/ $\sigma = 0.5$<br>$\rho = 0.9$<br><i>Oracle : 10</i> |
| CV.min | 7.52   | 0.85            | 0.23             | 81.11       | 7.4           |                                                                   |
| AICc   | 5.54   | 39.18           | 55.9             | 21.08       |               |                                                                   |
| AIC    | 115.04 | 94.12           | 71.57            | 96.28       |               |                                                                   |
| BIC    | 113.72 | 92.32           | 70.03            | 95.6        |               |                                                                   |

Table 94: Nonzero coefficients at n=100, binary design, sparse covariates, and decay 100.

|        | lasso  | GL $\gamma = 1$ | GL $\gamma = 10$ | marginal AL | sparsenet MCP |                                                                   |
|--------|--------|-----------------|------------------|-------------|---------------|-------------------------------------------------------------------|
| CV.1se | 16.25  | 9.9             | 2.56             | 40.8        | 13.89         | sd( $\mu$ )/ $\sigma = 2$<br>$\rho = 0$<br><i>Oracle : 10</i>     |
| CV.min | 56.12  | 30.29           | 7.09             | 68.19       | 43.91         |                                                                   |
| AICc   | 25.92  | 20.1            | 50.87            | 29.8        |               |                                                                   |
| AIC    | 109.5  | 94.17           | 71.06            | 86.42       |               |                                                                   |
| BIC    | 107.71 | 92.58           | 69.35            | 81.31       |               |                                                                   |
| CV.1se | 12.66  | 7.82            | 1.83             | 43.08       | 12.63         | sd( $\mu$ )/ $\sigma = 2$<br>$\rho = 0.5$<br><i>Oracle : 10</i>   |
| CV.min | 51.74  | 29.5            | 5.79             | 72.42       | 45.16         |                                                                   |
| AICc   | 23.93  | 21.36           | 51.14            | 30.35       |               |                                                                   |
| AIC    | 110.06 | 95.36           | 72.61            | 88.21       |               |                                                                   |
| BIC    | 108.22 | 93.81           | 71.01            | 85.14       |               |                                                                   |
| CV.1se | 12.13  | 7.54            | 1.57             | 43.65       | 11.08         | sd( $\mu$ )/ $\sigma = 2$<br>$\rho = 0.9$<br><i>Oracle : 10</i>   |
| CV.min | 51.24  | 27.8            | 5.46             | 72.44       | 42.37         |                                                                   |
| AICc   | 23.51  | 22.16           | 50.82            | 29.91       |               |                                                                   |
| AIC    | 109.96 | 95.43           | 72.92            | 88.15       |               |                                                                   |
| BIC    | 108.27 | 93.79           | 71.36            | 84.83       |               |                                                                   |
| CV.1se | 1.67   | 0.54            | 0.17             | 46.44       | 1.52          | sd( $\mu$ )/ $\sigma = 1$<br>$\rho = 0$<br><i>Oracle : 10</i>     |
| CV.min | 21.94  | 4.62            | 0.85             | 79.58       | 19.81         |                                                                   |
| AICc   | 11.21  | 25.15           | 54.4             | 24.47       |               |                                                                   |
| AIC    | 113.21 | 94.98           | 72.58            | 93.3        |               |                                                                   |
| BIC    | 111.84 | 93.46           | 70.87            | 92.48       |               |                                                                   |
| CV.1se | 1.31   | 0.46            | 0.16             | 48.53       | 1.11          | sd( $\mu$ )/ $\sigma = 1$<br>$\rho = 0.5$<br><i>Oracle : 10</i>   |
| CV.min | 17.75  | 3.93            | 0.74             | 81.02       | 17.72         |                                                                   |
| AICc   | 9.99   | 22.08           | 53.71            | 23.21       |               |                                                                   |
| AIC    | 113.45 | 95.41           | 73.3             | 93.87       |               |                                                                   |
| BIC    | 112.21 | 93.9            | 71.58            | 93.07       |               |                                                                   |
| CV.1se | 1.48   | 0.44            | 0.15             | 46.94       | 1.36          | sd( $\mu$ )/ $\sigma = 1$<br>$\rho = 0.9$<br><i>Oracle : 10</i>   |
| CV.min | 18.39  | 4.36            | 0.68             | 78.06       | 16.65         |                                                                   |
| AICc   | 9.9    | 20.73           | 54.31            | 23.77       |               |                                                                   |
| AIC    | 113.62 | 95.86           | 73.83            | 93.83       |               |                                                                   |
| BIC    | 111.78 | 94.25           | 72.08            | 92.75       |               |                                                                   |
| CV.1se | 0.2    | 0.05            | 0.03             | 48.94       | 0.51          | sd( $\mu$ )/ $\sigma = 0.5$<br>$\rho = 0$<br><i>Oracle : 10</i>   |
| CV.min | 7.25   | 0.85            | 0.24             | 82.54       | 7.42          |                                                                   |
| AICc   | 5.58   | 42.66           | 56.7             | 20.93       |               |                                                                   |
| AIC    | 115.13 | 92.77           | 70.27            | 96.11       |               |                                                                   |
| BIC    | 113.8  | 91.17           | 68.87            | 95.44       |               |                                                                   |
| CV.1se | 0.13   | 0.06            | 0.03             | 48.89       | 0.47          | sd( $\mu$ )/ $\sigma = 0.5$<br>$\rho = 0.5$<br><i>Oracle : 10</i> |
| CV.min | 7.36   | 0.71            | 0.23             | 82.88       | 6.72          |                                                                   |
| AICc   | 5.47   | 40.99           | 56.27            | 20.73       |               |                                                                   |
| AIC    | 115.14 | 93.36           | 71.01            | 96.47       |               |                                                                   |
| BIC    | 114.08 | 91.68           | 69.34            | 95.79       |               |                                                                   |
| CV.1se | 0.31   | 0.06            | 0.03             | 46.93       | 0.54          | sd( $\mu$ )/ $\sigma = 0.5$<br>$\rho = 0.9$<br><i>Oracle : 10</i> |
| CV.min | 7.5    | 0.77            | 0.22             | 80.97       | 7.4           |                                                                   |
| AICc   | 5.59   | 40.25           | 56.13            | 21.02       |               |                                                                   |
| AIC    | 115.22 | 93.28           | 71.09            | 96.18       |               |                                                                   |
| BIC    | 113.78 | 91.46           | 69.58            | 95.53       |               |                                                                   |

Table 95: Nonzero coefficients at n=100, binary design, sparse covariates, and decay 200.

|        | lasso  | GL $\gamma = 1$ | GL $\gamma = 10$ | marginal AL | sparsenet MCP |                                                                   |
|--------|--------|-----------------|------------------|-------------|---------------|-------------------------------------------------------------------|
| CV.1se | 16.3   | 9.87            | 2.6              | 40.81       | 13.9          | sd( $\mu$ )/ $\sigma = 2$<br>$\rho = 0$<br><i>Oracle : 10</i>     |
| CV.min | 56.43  | 30.25           | 7.22             | 68.21       | 44.62         |                                                                   |
| AICc   | 25.96  | 20.19           | 50.51            | 30.09       |               |                                                                   |
| AIC    | 109.46 | 94.02           | 70.89            | 86.51       |               |                                                                   |
| BIC    | 107.7  | 92.34           | 69.24            | 81.5        |               |                                                                   |
| CV.1se | 12.64  | 7.58            | 1.76             | 43.12       | 12.52         | sd( $\mu$ )/ $\sigma = 2$<br>$\rho = 0.5$<br><i>Oracle : 10</i>   |
| CV.min | 51.72  | 28.7            | 5.71             | 72.35       | 45.49         |                                                                   |
| AICc   | 24.19  | 21.69           | 51.09            | 30.58       |               |                                                                   |
| AIC    | 109.97 | 95.16           | 72.22            | 88.27       |               |                                                                   |
| BIC    | 108.2  | 93.63           | 70.63            | 85.32       |               |                                                                   |
| CV.1se | 12.47  | 7.56            | 1.56             | 43.72       | 11.49         | sd( $\mu$ )/ $\sigma = 2$<br>$\rho = 0.9$<br><i>Oracle : 10</i>   |
| CV.min | 52.07  | 28.03           | 5.1              | 72.34       | 43.41         |                                                                   |
| AICc   | 23.59  | 22.25           | 51.31            | 29.76       |               |                                                                   |
| AIC    | 110.06 | 95.27           | 72.43            | 88.19       |               |                                                                   |
| BIC    | 108.38 | 93.75           | 70.8             | 85.2        |               |                                                                   |
| CV.1se | 1.67   | 0.58            | 0.17             | 46.52       | 1.53          | sd( $\mu$ )/ $\sigma = 1$<br>$\rho = 0$<br><i>Oracle : 10</i>     |
| CV.min | 21.53  | 4.46            | 0.88             | 79.52       | 19.68         |                                                                   |
| AICc   | 11.19  | 26.01           | 54.39            | 24.47       |               |                                                                   |
| AIC    | 113.26 | 94.75           | 72.32            | 93.32       |               |                                                                   |
| BIC    | 111.88 | 92.98           | 70.66            | 92.52       |               |                                                                   |
| CV.1se | 1.39   | 0.49            | 0.14             | 48.48       | 1.08          | sd( $\mu$ )/ $\sigma = 1$<br>$\rho = 0.5$<br><i>Oracle : 10</i>   |
| CV.min | 17.82  | 3.67            | 0.7              | 80.79       | 16.98         |                                                                   |
| AICc   | 9.77   | 23.42           | 53.92            | 23.32       |               |                                                                   |
| AIC    | 113.55 | 95.31           | 73.21            | 93.9        |               |                                                                   |
| BIC    | 112.09 | 93.71           | 71.35            | 93.02       |               |                                                                   |
| CV.1se | 1.49   | 0.47            | 0.17             | 47.01       | 1.38          | sd( $\mu$ )/ $\sigma = 1$<br>$\rho = 0.9$<br><i>Oracle : 10</i>   |
| CV.min | 18.57  | 3.81            | 0.71             | 78.45       | 16.48         |                                                                   |
| AICc   | 9.44   | 22.28           | 54.36            | 24.04       |               |                                                                   |
| AIC    | 113.62 | 95.64           | 73.58            | 93.83       |               |                                                                   |
| BIC    | 112.03 | 93.96           | 72.05            | 92.8        |               |                                                                   |
| CV.1se | 0.18   | 0.05            | 0.04             | 49.01       | 0.5           | sd( $\mu$ )/ $\sigma = 0.5$<br>$\rho = 0$<br><i>Oracle : 10</i>   |
| CV.min | 7.3    | 0.76            | 0.22             | 82.27       | 7.55          |                                                                   |
| AICc   | 5.68   | 42.76           | 56.51            | 20.96       |               |                                                                   |
| AIC    | 115.05 | 92.49           | 70.28            | 96.17       |               |                                                                   |
| BIC    | 113.84 | 90.98           | 68.77            | 95.54       |               |                                                                   |
| CV.1se | 0.13   | 0.06            | 0.02             | 49.06       | 0.49          | sd( $\mu$ )/ $\sigma = 0.5$<br>$\rho = 0.5$<br><i>Oracle : 10</i> |
| CV.min | 7.18   | 0.72            | 0.22             | 82.87       | 6.86          |                                                                   |
| AICc   | 5.32   | 41.42           | 56.52            | 20.47       |               |                                                                   |
| AIC    | 115.25 | 93.32           | 70.79            | 96.45       |               |                                                                   |
| BIC    | 113.97 | 91.47           | 69.17            | 95.78       |               |                                                                   |
| CV.1se | 0.32   | 0.09            | 0.02             | 47.14       | 0.5           | sd( $\mu$ )/ $\sigma = 0.5$<br>$\rho = 0.9$<br><i>Oracle : 10</i> |
| CV.min | 7.87   | 0.81            | 0.21             | 81.23       | 7.48          |                                                                   |
| AICc   | 5.56   | 41.04           | 56.52            | 21.18       |               |                                                                   |
| AIC    | 115.32 | 93.22           | 70.92            | 96.26       |               |                                                                   |
| BIC    | 113.95 | 91.52           | 69.54            | 95.46       |               |                                                                   |

Table 96: Nonzero coefficients at n=100, continuous design, sparse covariates, and decay 10.

|        | lasso  | GL $\gamma = 1$ | GL $\gamma = 10$ | marginal AL | sparsenet MCP |                                                                   |
|--------|--------|-----------------|------------------|-------------|---------------|-------------------------------------------------------------------|
| CV.1se | 14.5   | 10.37           | 4.59             | 34.35       | 9.08          | sd( $\mu$ )/ $\sigma = 2$<br>$\rho = 0$<br><i>Oracle : 10</i>     |
| CV.min | 48.76  | 30.49           | 9.09             | 62.24       | 25.12         |                                                                   |
| AICc   | 23.63  | 12.69           | 40.4             | 27.3        |               |                                                                   |
| AIC    | 107.21 | 95.86           | 73.11            | 82.84       |               |                                                                   |
| BIC    | 105.59 | 94.62           | 71.98            | 68.72       |               |                                                                   |
| CV.1se | 1.85   | 2.03            | 0.98             | 34.6        | 2.43          | sd( $\mu$ )/ $\sigma = 2$<br>$\rho = 0.5$<br><i>Oracle : 10</i>   |
| CV.min | 18.64  | 13.43           | 2.57             | 67.88       | 10.97         |                                                                   |
| AICc   | 11.48  | 3.33            | 32.98            | 21.77       |               |                                                                   |
| AIC    | 108.62 | 99.01           | 78.58            | 86.94       |               |                                                                   |
| BIC    | 107.48 | 98.11           | 77.47            | 69.36       |               |                                                                   |
| CV.1se | 1.87   | 1.57            | 1.21             | 14.26       | 1.38          | sd( $\mu$ )/ $\sigma = 2$<br>$\rho = 0.9$<br><i>Oracle : 10</i>   |
| CV.min | 12.42  | 8.94            | 2.65             | 35.64       | 4.83          |                                                                   |
| AICc   | 9.63   | 2.13            | 1.09             | 20.56       |               |                                                                   |
| AIC    | 103.72 | 94.2            | 74.92            | 59.68       |               |                                                                   |
| BIC    | 96.42  | 91.4            | 74.17            | 4.16        |               |                                                                   |
| CV.1se | 2.32   | 1.23            | 0.47             | 42.95       | 1.56          | sd( $\mu$ )/ $\sigma = 1$<br>$\rho = 0$<br><i>Oracle : 10</i>     |
| CV.min | 21.01  | 7.68            | 1.51             | 75.87       | 17.68         |                                                                   |
| AICc   | 12.34  | 2.64            | 52.92            | 22.95       |               |                                                                   |
| AIC    | 112.42 | 97.36           | 75.51            | 91.96       |               |                                                                   |
| BIC    | 110.69 | 96.1            | 73.51            | 89.39       |               |                                                                   |
| CV.1se | 0.65   | 0.47            | 0.24             | 37.69       | 0.66          | sd( $\mu$ )/ $\sigma = 1$<br>$\rho = 0.5$<br><i>Oracle : 10</i>   |
| CV.min | 10.16  | 4.68            | 1                | 71.7        | 7.12          |                                                                   |
| AICc   | 7.91   | 1.19            | 49.4             | 20.47       |               |                                                                   |
| AIC    | 112.63 | 100.66          | 80.45            | 92.43       |               |                                                                   |
| BIC    | 110.97 | 99.28           | 79.02            | 88.18       |               |                                                                   |
| CV.1se | 1.08   | 1.02            | 0.88             | 8.06        | 0.92          | sd( $\mu$ )/ $\sigma = 1$<br>$\rho = 0.9$<br><i>Oracle : 10</i>   |
| CV.min | 9.12   | 6.35            | 1.86             | 27.66       | 4.02          |                                                                   |
| AICc   | 8.21   | 1.51            | 1.5              | 14.76       |               |                                                                   |
| AIC    | 108.8  | 96.79           | 77.68            | 77.15       |               |                                                                   |
| BIC    | 107.12 | 96.28           | 76.8             | 6.57        |               |                                                                   |
| CV.1se | 0.43   | 0.1             | 0.04             | 47.17       | 0.53          | sd( $\mu$ )/ $\sigma = 0.5$<br>$\rho = 0$<br><i>Oracle : 10</i>   |
| CV.min | 7.26   | 1.51            | 0.35             | 81.57       | 7.12          |                                                                   |
| AICc   | 6.04   | 5.46            | 56.14            | 20.48       |               |                                                                   |
| AIC    | 114.91 | 96.23           | 74.15            | 96.17       |               |                                                                   |
| BIC    | 113.8  | 95.08           | 71.87            | 95.47       |               |                                                                   |
| CV.1se | 0.19   | 0.1             | 0.03             | 40.1        | 0.4           | sd( $\mu$ )/ $\sigma = 0.5$<br>$\rho = 0.5$<br><i>Oracle : 10</i> |
| CV.min | 6.2    | 1.96            | 0.33             | 73.69       | 5.92          |                                                                   |
| AICc   | 5.5    | 0.51            | 54.56            | 19.49       |               |                                                                   |
| AIC    | 115.31 | 99.61           | 78.56            | 95.89       |               |                                                                   |
| BIC    | 113.74 | 98.17           | 76.53            | 94.87       |               |                                                                   |
| CV.1se | 0.27   | 0.21            | 0.13             | 8.65        | 0.47          | sd( $\mu$ )/ $\sigma = 0.5$<br>$\rho = 0.9$<br><i>Oracle : 10</i> |
| CV.min | 6.07   | 3.78            | 0.76             | 29.34       | 4.84          |                                                                   |
| AICc   | 6.02   | 0.53            | 39.04            | 15.1        |               |                                                                   |
| AIC    | 114.26 | 98.77           | 79.84            | 91.25       |               |                                                                   |
| BIC    | 113.21 | 98.28           | 78.81            | 40.59       |               |                                                                   |



Table 97: Nonzero coefficients at n=100, continuous design, sparse covariates, and decay 50.

|        | lasso  | GL $\gamma = 1$ | GL $\gamma = 10$ | marginal AL | sparsenet MCP |                                                                   |
|--------|--------|-----------------|------------------|-------------|---------------|-------------------------------------------------------------------|
| CV.1se | 15.25  | 9.84            | 2.94             | 38.53       | 12.86         | sd( $\mu$ )/ $\sigma = 2$<br>$\rho = 0$<br><i>Oracle : 10</i>     |
| CV.min | 52.29  | 29.7            | 7.84             | 65.99       | 41.23         |                                                                   |
| AICc   | 25.49  | 14.18           | 48.45            | 29.4        |               |                                                                   |
| AIC    | 108.91 | 94.44           | 71.11            | 85.89       |               |                                                                   |
| BIC    | 107.15 | 93.03           | 69.96            | 79.75       |               |                                                                   |
| CV.1se | 1.13   | 0.83            | 0.32             | 38.6        | 1.18          | sd( $\mu$ )/ $\sigma = 2$<br>$\rho = 0.5$<br><i>Oracle : 10</i>   |
| CV.min | 15.96  | 7.85            | 1.36             | 71.45       | 12.66         |                                                                   |
| AICc   | 10.31  | 2.05            | 51.43            | 22.39       |               |                                                                   |
| AIC    | 111.75 | 99.46           | 78.84            | 91.86       |               |                                                                   |
| BIC    | 110.21 | 98.12           | 77.3             | 88.77       |               |                                                                   |
| CV.1se | 2.94   | 2.39            | 1.55             | 11.52       | 1.8           | sd( $\mu$ )/ $\sigma = 2$<br>$\rho = 0.9$<br><i>Oracle : 10</i>   |
| CV.min | 17.32  | 11.96           | 3.39             | 31.45       | 5.82          |                                                                   |
| AICc   | 12.15  | 2.92            | 4.24             | 17.22       |               |                                                                   |
| AIC    | 110.52 | 98.92           | 79.39            | 82.52       |               |                                                                   |
| BIC    | 109.06 | 98.51           | 78.52            | 16.99       |               |                                                                   |
| CV.1se | 1.89   | 0.68            | 0.22             | 45.26       | 1.47          | sd( $\mu$ )/ $\sigma = 1$<br>$\rho = 0$<br><i>Oracle : 10</i>     |
| CV.min | 20.44  | 4.87            | 1                | 77.64       | 19.27         |                                                                   |
| AICc   | 11.4   | 3.98            | 55.05            | 23.7        |               |                                                                   |
| AIC    | 112.93 | 95.4            | 72.56            | 93.21       |               |                                                                   |
| BIC    | 111.49 | 93.86           | 71.14            | 92.01       |               |                                                                   |
| CV.1se | 0.47   | 0.15            | 0.09             | 40.29       | 0.5           | sd( $\mu$ )/ $\sigma = 1$<br>$\rho = 0.5$<br><i>Oracle : 10</i>   |
| CV.min | 8.63   | 3.06            | 0.5              | 73.88       | 8.11          |                                                                   |
| AICc   | 6.57   | 1.17            | 53.49            | 20.6        |               |                                                                   |
| AIC    | 114.17 | 99.81           | 78.69            | 94.66       |               |                                                                   |
| BIC    | 112.51 | 98.2            | 76.7             | 92.95       |               |                                                                   |
| CV.1se | 0.92   | 0.75            | 0.43             | 10.91       | 0.9           | sd( $\mu$ )/ $\sigma = 1$<br>$\rho = 0.9$<br><i>Oracle : 10</i>   |
| CV.min | 10.64  | 7.1             | 1.62             | 31.65       | 6.78          |                                                                   |
| AICc   | 8.71   | 1.03            | 22.63            | 16.97       |               |                                                                   |
| AIC    | 113.45 | 99.75           | 80.37            | 89.73       |               |                                                                   |
| BIC    | 112.3  | 99.31           | 79.27            | 36.91       |               |                                                                   |
| CV.1se | 0.45   | 0.08            | 0.04             | 47.64       | 0.51          | sd( $\mu$ )/ $\sigma = 0.5$<br>$\rho = 0$<br><i>Oracle : 10</i>   |
| CV.min | 7.27   | 1.09            | 0.24             | 83.01       | 6.88          |                                                                   |
| AICc   | 5.88   | 21.4            | 57.22            | 20.57       |               |                                                                   |
| AIC    | 115.22 | 93.22           | 70.71            | 96.37       |               |                                                                   |
| BIC    | 113.89 | 91.61           | 69.19            | 95.75       |               |                                                                   |
| CV.1se | 0.16   | 0.05            | 0.01             | 40.62       | 0.38          | sd( $\mu$ )/ $\sigma = 0.5$<br>$\rho = 0.5$<br><i>Oracle : 10</i> |
| CV.min | 5.75   | 1.27            | 0.24             | 74.63       | 5.47          |                                                                   |
| AICc   | 4.8    | 2.44            | 56.44            | 19.2        |               |                                                                   |
| AIC    | 115.48 | 97.16           | 75.46            | 96.22       |               |                                                                   |
| BIC    | 113.75 | 95.41           | 73.34            | 95.56       |               |                                                                   |
| CV.1se | 0.23   | 0.1             | 0.04             | 9.17        | 0.41          | sd( $\mu$ )/ $\sigma = 0.5$<br>$\rho = 0.9$<br><i>Oracle : 10</i> |
| CV.min | 5.11   | 2.47            | 0.36             | 30.21       | 4.47          |                                                                   |
| AICc   | 4.77   | 0.2             | 59.58            | 14.71       |               |                                                                   |
| AIC    | 115.51 | 97.78           | 79.39            | 93.86       |               |                                                                   |
| BIC    | 114.51 | 97.09           | 77.93            | 56.05       |               |                                                                   |

Table 98: Nonzero coefficients at n=100, continuous design, sparse covariates, and decay 100.

|        | lasso  | GL $\gamma = 1$ | GL $\gamma = 10$ | marginal AL | sparsenet MCP |                                                                   |
|--------|--------|-----------------|------------------|-------------|---------------|-------------------------------------------------------------------|
| CV.1se | 15.3   | 9.46            | 2.79             | 38.84       | 13.15         | sd( $\mu$ )/ $\sigma = 2$<br>$\rho = 0$<br><i>Oracle : 10</i>     |
| CV.min | 52.74  | 28.67           | 7.57             | 66.14       | 40.88         |                                                                   |
| AICc   | 25.79  | 14.25           | 49.58            | 29.74       |               |                                                                   |
| AIC    | 109.07 | 94.06           | 70.86            | 85.87       |               |                                                                   |
| BIC    | 107.23 | 92.67           | 69.57            | 80.39       |               |                                                                   |
| CV.1se | 1.15   | 0.8             | 0.29             | 38.82       | 1.13          | sd( $\mu$ )/ $\sigma = 2$<br>$\rho = 0.5$<br><i>Oracle : 10</i>   |
| CV.min | 15.67  | 7.55            | 1.3              | 71.88       | 12.83         |                                                                   |
| AICc   | 9.99   | 2.09            | 51.75            | 22.65       |               |                                                                   |
| AIC    | 111.92 | 99.41           | 78.36            | 92.07       |               |                                                                   |
| BIC    | 110.3  | 97.87           | 76.79            | 88.34       |               |                                                                   |
| CV.1se | 3.02   | 2.37            | 1.53             | 11.41       | 1.84          | sd( $\mu$ )/ $\sigma = 2$<br>$\rho = 0.9$<br><i>Oracle : 10</i>   |
| CV.min | 17.58  | 11.65           | 3.21             | 30.64       | 6.05          |                                                                   |
| AICc   | 12.44  | 2.96            | 4.2              | 17.48       |               |                                                                   |
| AIC    | 111.28 | 99.27           | 79.3             | 84.13       |               |                                                                   |
| BIC    | 110.01 | 98.5            | 78.44            | 19.56       |               |                                                                   |
| CV.1se | 1.85   | 0.68            | 0.25             | 45.32       | 1.5           | sd( $\mu$ )/ $\sigma = 1$<br>$\rho = 0$<br><i>Oracle : 10</i>     |
| CV.min | 20.34  | 4.69            | 0.94             | 77.91       | 19.42         |                                                                   |
| AICc   | 11.35  | 4.96            | 55.5             | 23.71       |               |                                                                   |
| AIC    | 112.88 | 94.53           | 72.26            | 93.26       |               |                                                                   |
| BIC    | 111.39 | 93.22           | 70.86            | 92.15       |               |                                                                   |
| CV.1se | 0.49   | 0.15            | 0.09             | 40.63       | 0.55          | sd( $\mu$ )/ $\sigma = 1$<br>$\rho = 0.5$<br><i>Oracle : 10</i>   |
| CV.min | 8.72   | 2.83            | 0.49             | 74.05       | 7.92          |                                                                   |
| AICc   | 6.7    | 1.08            | 54.75            | 20.91       |               |                                                                   |
| AIC    | 114.18 | 99.19           | 78.32            | 94.66       |               |                                                                   |
| BIC    | 112.37 | 97.6            | 76.47            | 93.35       |               |                                                                   |
| CV.1se | 0.93   | 0.75            | 0.41             | 11.31       | 0.92          | sd( $\mu$ )/ $\sigma = 1$<br>$\rho = 0.9$<br><i>Oracle : 10</i>   |
| CV.min | 10.6   | 6.93            | 1.59             | 31.92       | 6.93          |                                                                   |
| AICc   | 8.87   | 1               | 28.15            | 17.33       |               |                                                                   |
| AIC    | 113.67 | 99.58           | 80.42            | 90.31       |               |                                                                   |
| BIC    | 112.6  | 98.96           | 79.3             | 38.44       |               |                                                                   |
| CV.1se | 0.39   | 0.09            | 0.03             | 47.88       | 0.51          | sd( $\mu$ )/ $\sigma = 0.5$<br>$\rho = 0$<br><i>Oracle : 10</i>   |
| CV.min | 7.02   | 0.94            | 0.22             | 83.05       | 6.92          |                                                                   |
| AICc   | 6.03   | 23.93           | 58.01            | 20.39       |               |                                                                   |
| AIC    | 115.14 | 92.72           | 70.33            | 96.45       |               |                                                                   |
| BIC    | 113.9  | 91.32           | 68.77            | 95.84       |               |                                                                   |
| CV.1se | 0.15   | 0.05            | 0.01             | 40.56       | 0.39          | sd( $\mu$ )/ $\sigma = 0.5$<br>$\rho = 0.5$<br><i>Oracle : 10</i> |
| CV.min | 5.64   | 1.13            | 0.24             | 74.59       | 5.6           |                                                                   |
| AICc   | 4.77   | 3.34            | 56.58            | 18.98       |               |                                                                   |
| AIC    | 115.38 | 96.69           | 74.79            | 96.22       |               |                                                                   |
| BIC    | 113.88 | 95.01           | 72.91            | 95.49       |               |                                                                   |
| CV.1se | 0.22   | 0.09            | 0.05             | 9.07        | 0.39          | sd( $\mu$ )/ $\sigma = 0.5$<br>$\rho = 0.9$<br><i>Oracle : 10</i> |
| CV.min | 4.92   | 2.39            | 0.35             | 30.14       | 4.48          |                                                                   |
| AICc   | 4.99   | 0.18            | 60.35            | 14.89       |               |                                                                   |
| AIC    | 115.45 | 97.52           | 79.08            | 94.04       |               |                                                                   |
| BIC    | 114.32 | 96.92           | 77.76            | 56.09       |               |                                                                   |

Table 99: Nonzero coefficients at n=100, continuous design, sparse covariates, and decay 200.

|        | lasso  | GL $\gamma = 1$ | GL $\gamma = 10$ | marginal AL | sparsenet MCP |                                                                   |
|--------|--------|-----------------|------------------|-------------|---------------|-------------------------------------------------------------------|
| CV.1se | 15.21  | 9.35            | 2.77             | 38.82       | 13.47         | sd( $\mu$ )/ $\sigma = 2$<br>$\rho = 0$<br><i>Oracle : 10</i>     |
| CV.min | 52.82  | 28.65           | 7.41             | 66.02       | 41.77         |                                                                   |
| AICc   | 25.42  | 14.14           | 50.04            | 29.98       |               |                                                                   |
| AIC    | 109.08 | 93.8            | 70.69            | 85.97       |               |                                                                   |
| BIC    | 107.32 | 92.37           | 69.39            | 80.36       |               |                                                                   |
| CV.1se | 1.17   | 0.96            | 0.3              | 38.95       | 1.11          | sd( $\mu$ )/ $\sigma = 2$<br>$\rho = 0.5$<br><i>Oracle : 10</i>   |
| CV.min | 15.91  | 7.53            | 1.25             | 71.91       | 12.68         |                                                                   |
| AICc   | 10.01  | 1.97            | 50.99            | 22.59       |               |                                                                   |
| AIC    | 111.92 | 99.13           | 78.16            | 92.24       |               |                                                                   |
| BIC    | 110.31 | 97.63           | 76.44            | 88.11       |               |                                                                   |
| CV.1se | 3.06   | 2.36            | 1.54             | 11.34       | 1.82          | sd( $\mu$ )/ $\sigma = 2$<br>$\rho = 0.9$<br><i>Oracle : 10</i>   |
| CV.min | 17.76  | 11.56           | 3.37             | 30.47       | 6.11          |                                                                   |
| AICc   | 12.36  | 2.97            | 5.95             | 17.28       |               |                                                                   |
| AIC    | 111.5  | 99.3            | 79.39            | 84.64       |               |                                                                   |
| BIC    | 110.17 | 98.8            | 78.55            | 21.46       |               |                                                                   |
| CV.1se | 1.82   | 0.61            | 0.24             | 45.25       | 1.42          | sd( $\mu$ )/ $\sigma = 1$<br>$\rho = 0$<br><i>Oracle : 10</i>     |
| CV.min | 20.17  | 4.57            | 1.05             | 77.66       | 19.06         |                                                                   |
| AICc   | 11.37  | 5.38            | 55.83            | 23.62       |               |                                                                   |
| AIC    | 112.97 | 94.51           | 71.98            | 93.3        |               |                                                                   |
| BIC    | 111.61 | 93.11           | 70.39            | 91.94       |               |                                                                   |
| CV.1se | 0.45   | 0.14            | 0.09             | 40.74       | 0.56          | sd( $\mu$ )/ $\sigma = 1$<br>$\rho = 0.5$<br><i>Oracle : 10</i>   |
| CV.min | 8.58   | 2.68            | 0.51             | 74.03       | 7.9           |                                                                   |
| AICc   | 6.68   | 1.07            | 54.68            | 20.64       |               |                                                                   |
| AIC    | 114.12 | 99.09           | 78               | 94.62       |               |                                                                   |
| BIC    | 112.63 | 97.48           | 75.92            | 93.32       |               |                                                                   |
| CV.1se | 0.95   | 0.75            | 0.38             | 11.42       | 0.88          | sd( $\mu$ )/ $\sigma = 1$<br>$\rho = 0.9$<br><i>Oracle : 10</i>   |
| CV.min | 10.38  | 6.89            | 1.56             | 31.8        | 6.94          |                                                                   |
| AICc   | 8.91   | 0.97            | 29.77            | 17.51       |               |                                                                   |
| AIC    | 113.75 | 99.3            | 80.23            | 90.54       |               |                                                                   |
| BIC    | 112.62 | 98.61           | 78.95            | 40.24       |               |                                                                   |
| CV.1se | 0.4    | 0.09            | 0.03             | 47.72       | 0.52          | sd( $\mu$ )/ $\sigma = 0.5$<br>$\rho = 0$<br><i>Oracle : 10</i>   |
| CV.min | 7.16   | 0.87            | 0.23             | 83.11       | 6.8           |                                                                   |
| AICc   | 5.98   | 25.61           | 57.58            | 20.44       |               |                                                                   |
| AIC    | 115.19 | 92.21           | 69.93            | 96.41       |               |                                                                   |
| BIC    | 114    | 90.72           | 68.56            | 95.8        |               |                                                                   |
| CV.1se | 0.14   | 0.05            | 0.02             | 40.55       | 0.38          | sd( $\mu$ )/ $\sigma = 0.5$<br>$\rho = 0.5$<br><i>Oracle : 10</i> |
| CV.min | 5.73   | 1.12            | 0.24             | 74.35       | 5.55          |                                                                   |
| AICc   | 4.63   | 3.95            | 56.76            | 19.17       |               |                                                                   |
| AIC    | 115.4  | 96.71           | 74.93            | 96.33       |               |                                                                   |
| BIC    | 113.69 | 95.06           | 72.93            | 95.62       |               |                                                                   |
| CV.1se | 0.23   | 0.09            | 0.04             | 9.02        | 0.38          | sd( $\mu$ )/ $\sigma = 0.5$<br>$\rho = 0.9$<br><i>Oracle : 10</i> |
| CV.min | 4.93   | 2.29            | 0.36             | 30.16       | 4.45          |                                                                   |
| AICc   | 4.92   | 0.19            | 60.41            | 14.85       |               |                                                                   |
| AIC    | 115.49 | 97.2            | 79.11            | 94.12       |               |                                                                   |
| BIC    | 114.44 | 96.64           | 77.64            | 54.99       |               |                                                                   |

Table 100: **FDR | Sensitivity for n=1000, binary design, dense covariates, and decay 10.**

|        | lasso |      | GL $\gamma = 1$ |      | GL $\gamma = 10$ |      | marginal AL |      | sparsenet MCP |      |                                                                            |
|--------|-------|------|-----------------|------|------------------|------|-------------|------|---------------|------|----------------------------------------------------------------------------|
| CV.lse | 0.36  | 0.74 | 0.20            | 0.71 | 0.01             | 0.60 | 0.23        | 0.65 | 0.01          | 0.57 | $\text{sd}(\mu)/\sigma = 2$<br>$\rho = 0$<br>$\bar{s}_{Oracle} = 33.3$     |
| CV.min | 0.72  | 0.85 | 0.64            | 0.82 | 0.22             | 0.73 | 0.54        | 0.72 | 0.20          | 0.71 |                                                                            |
| AICc   | 0.70  | 0.84 | 0.63            | 0.82 | 0.36             | 0.76 | 0.52        | 0.72 |               |      |                                                                            |
| AIC    | 0.95  | 0.95 | 0.95            | 0.95 | 0.95             | 0.94 | 0.53        | 0.72 |               |      |                                                                            |
| BIC    | 0.22  | 0.71 | 0.14            | 0.69 | 0.01             | 0.61 | 0.17        | 0.63 |               |      |                                                                            |
| CV.lse | 0.41  | 0.74 | 0.25            | 0.71 | 0.02             | 0.60 | 0.28        | 0.65 | 0.01          | 0.57 | $\text{sd}(\mu)/\sigma = 2$<br>$\rho = 0.5$<br>$\bar{s}_{Oracle} = 33.3$   |
| CV.min | 0.74  | 0.84 | 0.66            | 0.82 | 0.25             | 0.72 | 0.56        | 0.72 | 0.21          | 0.71 |                                                                            |
| AICc   | 0.72  | 0.84 | 0.65            | 0.82 | 0.39             | 0.77 | 0.54        | 0.71 |               |      |                                                                            |
| AIC    | 0.95  | 0.96 | 0.95            | 0.95 | 0.95             | 0.94 | 0.55        | 0.71 |               |      |                                                                            |
| BIC    | 0.24  | 0.70 | 0.15            | 0.68 | 0.01             | 0.60 | 0.20        | 0.62 |               |      |                                                                            |
| CV.lse | 0.45  | 0.74 | 0.28            | 0.71 | 0.03             | 0.60 | 0.30        | 0.64 | 0.01          | 0.58 | $\text{sd}(\mu)/\sigma = 2$<br>$\rho = 0.9$<br>$\bar{s}_{Oracle} = 33.1$   |
| CV.min | 0.75  | 0.84 | 0.68            | 0.82 | 0.28             | 0.72 | 0.57        | 0.71 | 0.23          | 0.71 |                                                                            |
| AICc   | 0.73  | 0.83 | 0.66            | 0.81 | 0.40             | 0.76 | 0.55        | 0.70 |               |      |                                                                            |
| AIC    | 0.95  | 0.96 | 0.95            | 0.96 | 0.95             | 0.94 | 0.56        | 0.71 |               |      |                                                                            |
| BIC    | 0.27  | 0.69 | 0.17            | 0.68 | 0.02             | 0.60 | 0.22        | 0.61 |               |      |                                                                            |
| CV.lse | 0.27  | 0.64 | 0.13            | 0.59 | 0.01             | 0.47 | 0.45        | 0.67 | 0.01          | 0.46 | $\text{sd}(\mu)/\sigma = 1$<br>$\rho = 0$<br>$\bar{s}_{Oracle} = 26.3$     |
| CV.min | 0.72  | 0.79 | 0.61            | 0.76 | 0.14             | 0.61 | 0.81        | 0.81 | 0.26          | 0.65 |                                                                            |
| AICc   | 0.72  | 0.79 | 0.63            | 0.77 | 0.34             | 0.67 | 0.77        | 0.79 |               |      |                                                                            |
| AIC    | 0.97  | 0.95 | 0.97            | 0.95 | 0.97             | 0.93 | 0.85        | 0.83 |               |      |                                                                            |
| BIC    | 0.19  | 0.61 | 0.10            | 0.58 | 0.00             | 0.45 | 0.16        | 0.57 |               |      |                                                                            |
| CV.lse | 0.31  | 0.62 | 0.16            | 0.58 | 0.01             | 0.47 | 0.50        | 0.67 | 0.01          | 0.46 | $\text{sd}(\mu)/\sigma = 1$<br>$\rho = 0.5$<br>$\bar{s}_{Oracle} = 26.4$   |
| CV.min | 0.74  | 0.78 | 0.64            | 0.74 | 0.15             | 0.60 | 0.82        | 0.80 | 0.24          | 0.62 |                                                                            |
| AICc   | 0.73  | 0.78 | 0.65            | 0.75 | 0.37             | 0.67 | 0.78        | 0.77 |               |      |                                                                            |
| AIC    | 0.97  | 0.95 | 0.97            | 0.95 | 0.96             | 0.93 | 0.86        | 0.82 |               |      |                                                                            |
| BIC    | 0.21  | 0.59 | 0.12            | 0.56 | 0.01             | 0.45 | 0.19        | 0.56 |               |      |                                                                            |
| CV.lse | 0.35  | 0.63 | 0.19            | 0.58 | 0.02             | 0.47 | 0.51        | 0.66 | 0.01          | 0.46 | $\text{sd}(\mu)/\sigma = 1$<br>$\rho = 0.9$<br>$\bar{s}_{Oracle} = 26.1$   |
| CV.min | 0.75  | 0.79 | 0.66            | 0.75 | 0.18             | 0.60 | 0.81        | 0.79 | 0.27          | 0.63 |                                                                            |
| AICc   | 0.74  | 0.79 | 0.67            | 0.76 | 0.39             | 0.68 | 0.79        | 0.77 |               |      |                                                                            |
| AIC    | 0.97  | 0.95 | 0.97            | 0.95 | 0.96             | 0.93 | 0.85        | 0.82 |               |      |                                                                            |
| BIC    | 0.23  | 0.59 | 0.13            | 0.56 | 0.01             | 0.45 | 0.21        | 0.56 |               |      |                                                                            |
| CV.lse | 0.12  | 0.38 | 0.06            | 0.34 | 0.01             | 0.26 | 0.62        | 0.62 | 0.01          | 0.27 | $\text{sd}(\mu)/\sigma = 0.5$<br>$\rho = 0$<br>$\bar{s}_{Oracle} = 19.7$   |
| CV.min | 0.70  | 0.66 | 0.54            | 0.59 | 0.14             | 0.43 | 0.88        | 0.79 | 0.38          | 0.53 |                                                                            |
| AICc   | 0.73  | 0.69 | 0.60            | 0.63 | 0.22             | 0.43 | 0.85        | 0.76 |               |      |                                                                            |
| AIC    | 0.98  | 0.94 | 0.98            | 0.94 | 0.98             | 0.91 | 0.94        | 0.88 |               |      |                                                                            |
| BIC    | 0.13  | 0.40 | 0.06            | 0.36 | 0.00             | 0.18 | 0.17        | 0.44 |               |      |                                                                            |
| CV.lse | 0.14  | 0.36 | 0.08            | 0.33 | 0.01             | 0.26 | 0.66        | 0.62 | 0.01          | 0.26 | $\text{sd}(\mu)/\sigma = 0.5$<br>$\rho = 0.5$<br>$\bar{s}_{Oracle} = 19.4$ |
| CV.min | 0.72  | 0.66 | 0.59            | 0.59 | 0.14             | 0.42 | 0.89        | 0.79 | 0.36          | 0.51 |                                                                            |
| AICc   | 0.75  | 0.68 | 0.64            | 0.63 | 0.26             | 0.45 | 0.85        | 0.75 |               |      |                                                                            |
| AIC    | 0.98  | 0.95 | 0.98            | 0.94 | 0.98             | 0.92 | 0.95        | 0.88 |               |      |                                                                            |
| BIC    | 0.13  | 0.37 | 0.07            | 0.34 | 0.00             | 0.18 | 0.19        | 0.41 |               |      |                                                                            |
| CV.lse | 0.16  | 0.36 | 0.09            | 0.32 | 0.02             | 0.24 | 0.65        | 0.60 | 0.02          | 0.26 | $\text{sd}(\mu)/\sigma = 0.5$<br>$\rho = 0.9$<br>$\bar{s}_{Oracle} = 19.7$ |
| CV.min | 0.74  | 0.65 | 0.61            | 0.58 | 0.16             | 0.40 | 0.89        | 0.77 | 0.37          | 0.50 |                                                                            |
| AICc   | 0.76  | 0.66 | 0.66            | 0.62 | 0.28             | 0.44 | 0.86        | 0.73 |               |      |                                                                            |
| AIC    | 0.98  | 0.95 | 0.98            | 0.94 | 0.98             | 0.92 | 0.94        | 0.86 |               |      |                                                                            |
| BIC    | 0.14  | 0.35 | 0.07            | 0.32 | 0.00             | 0.17 | 0.21        | 0.40 |               |      |                                                                            |

Table 101: **FDR | Sensitivity for n=1000, binary design, dense covariates, and decay 50.**

|        | lasso |      | GL $\gamma = 1$ |      | GL $\gamma = 10$ |      | marginal AL |      | sparsenet MCP |      |                                                                            |
|--------|-------|------|-----------------|------|------------------|------|-------------|------|---------------|------|----------------------------------------------------------------------------|
| CV.lse | 0.49  | 0.76 | 0.36            | 0.71 | 0.07             | 0.56 | 0.43        | 0.66 | 0.15          | 0.61 | $\text{sd}(\mu)/\sigma = 2$<br>$\rho = 0$<br>$\bar{s}_{Oracle} = 124.2$    |
| CV.min | 0.64  | 0.83 | 0.56            | 0.80 | 0.19             | 0.65 | 0.57        | 0.74 | 0.39          | 0.74 |                                                                            |
| AICc   | 0.55  | 0.79 | 0.48            | 0.77 | 0.43             | 0.75 | 0.53        | 0.71 |               |      |                                                                            |
| AIC    | 0.84  | 0.94 | 0.84            | 0.94 | 0.84             | 0.91 | 0.63        | 0.77 |               |      |                                                                            |
| BIC    | 0.22  | 0.59 | 0.13            | 0.56 | 0.02             | 0.47 | 0.22        | 0.54 |               |      |                                                                            |
| CV.lse | 0.52  | 0.76 | 0.39            | 0.71 | 0.08             | 0.56 | 0.47        | 0.66 | 0.13          | 0.60 | $\text{sd}(\mu)/\sigma = 2$<br>$\rho = 0.5$<br>$\bar{s}_{Oracle} = 123.8$  |
| CV.min | 0.66  | 0.84 | 0.58            | 0.80 | 0.21             | 0.65 | 0.59        | 0.73 | 0.38          | 0.73 |                                                                            |
| AICc   | 0.57  | 0.78 | 0.50            | 0.77 | 0.44             | 0.76 | 0.55        | 0.71 |               |      |                                                                            |
| AIC    | 0.84  | 0.94 | 0.84            | 0.94 | 0.84             | 0.92 | 0.65        | 0.77 |               |      |                                                                            |
| BIC    | 0.23  | 0.57 | 0.15            | 0.55 | 0.02             | 0.47 | 0.25        | 0.53 |               |      |                                                                            |
| CV.lse | 0.54  | 0.76 | 0.41            | 0.71 | 0.10             | 0.56 | 0.48        | 0.65 | 0.16          | 0.60 | $\text{sd}(\mu)/\sigma = 2$<br>$\rho = 0.9$<br>$\bar{s}_{Oracle} = 123.6$  |
| CV.min | 0.67  | 0.84 | 0.59            | 0.80 | 0.24             | 0.65 | 0.60        | 0.73 | 0.39          | 0.73 |                                                                            |
| AICc   | 0.58  | 0.78 | 0.51            | 0.77 | 0.45             | 0.75 | 0.56        | 0.70 |               |      |                                                                            |
| AIC    | 0.84  | 0.94 | 0.84            | 0.94 | 0.84             | 0.91 | 0.65        | 0.76 |               |      |                                                                            |
| BIC    | 0.25  | 0.56 | 0.16            | 0.55 | 0.03             | 0.47 | 0.27        | 0.52 |               |      |                                                                            |
| CV.lse | 0.43  | 0.58 | 0.27            | 0.50 | 0.07             | 0.34 | 0.52        | 0.62 | 0.26          | 0.50 | $\text{sd}(\mu)/\sigma = 1$<br>$\rho = 0$<br>$\bar{s}_{Oracle} = 90.2$     |
| CV.min | 0.66  | 0.73 | 0.54            | 0.66 | 0.20             | 0.46 | 0.68        | 0.73 | 0.57          | 0.68 |                                                                            |
| AICc   | 0.60  | 0.69 | 0.55            | 0.67 | 0.62             | 0.69 | 0.62        | 0.69 |               |      |                                                                            |
| AIC    | 0.90  | 0.94 | 0.90            | 0.92 | 0.90             | 0.90 | 0.79        | 0.82 |               |      |                                                                            |
| BIC    | 0.08  | 0.24 | 0.06            | 0.29 | 0.01             | 0.12 | 0.17        | 0.38 |               |      |                                                                            |
| CV.lse | 0.46  | 0.57 | 0.31            | 0.49 | 0.08             | 0.34 | 0.55        | 0.61 | 0.23          | 0.46 | $\text{sd}(\mu)/\sigma = 1$<br>$\rho = 0.5$<br>$\bar{s}_{Oracle} = 90.2$   |
| CV.min | 0.67  | 0.73 | 0.56            | 0.66 | 0.21             | 0.46 | 0.69        | 0.72 | 0.55          | 0.66 |                                                                            |
| AICc   | 0.61  | 0.68 | 0.56            | 0.66 | 0.62             | 0.69 | 0.64        | 0.68 |               |      |                                                                            |
| AIC    | 0.90  | 0.94 | 0.90            | 0.93 | 0.90             | 0.90 | 0.80        | 0.82 |               |      |                                                                            |
| BIC    | 0.06  | 0.17 | 0.07            | 0.26 | 0.01             | 0.12 | 0.18        | 0.35 |               |      |                                                                            |
| CV.lse | 0.48  | 0.57 | 0.34            | 0.50 | 0.10             | 0.33 | 0.56        | 0.61 | 0.26          | 0.47 | $\text{sd}(\mu)/\sigma = 1$<br>$\rho = 0.9$<br>$\bar{s}_{Oracle} = 89.2$   |
| CV.min | 0.68  | 0.73 | 0.58            | 0.67 | 0.24             | 0.46 | 0.69        | 0.71 | 0.56          | 0.66 |                                                                            |
| AICc   | 0.62  | 0.69 | 0.57            | 0.67 | 0.63             | 0.69 | 0.65        | 0.68 |               |      |                                                                            |
| AIC    | 0.90  | 0.94 | 0.90            | 0.93 | 0.90             | 0.90 | 0.80        | 0.81 |               |      |                                                                            |
| BIC    | 0.06  | 0.16 | 0.08            | 0.24 | 0.01             | 0.10 | 0.20        | 0.34 |               |      |                                                                            |
| CV.lse | 0.08  | 0.06 | 0.03            | 0.02 | 0.00             | 0.01 | 0.65        | 0.44 | 0.09          | 0.04 | $\text{sd}(\mu)/\sigma = 0.5$<br>$\rho = 0$<br>$\bar{s}_{Oracle} = 56.2$   |
| CV.min | 0.61  | 0.41 | 0.34            | 0.21 | 0.07             | 0.05 | 0.80        | 0.64 | 0.59          | 0.40 |                                                                            |
| AICc   | 0.64  | 0.43 | 0.63            | 0.43 | 0.23             | 0.16 | 0.76        | 0.57 |               |      |                                                                            |
| AIC    | 0.94  | 0.92 | 0.94            | 0.90 | 0.94             | 0.90 | 0.90        | 0.81 |               |      |                                                                            |
| BIC    | 0.01  | 0.01 | 0.00            | 0.01 | 0.00             | 0.00 | 0.06        | 0.04 |               |      |                                                                            |
| CV.lse | 0.07  | 0.04 | 0.03            | 0.02 | 0.00             | 0.00 | 0.67        | 0.42 | 0.08          | 0.03 | $\text{sd}(\mu)/\sigma = 0.5$<br>$\rho = 0.5$<br>$\bar{s}_{Oracle} = 56.2$ |
| CV.min | 0.60  | 0.36 | 0.34            | 0.19 | 0.08             | 0.04 | 0.81        | 0.61 | 0.57          | 0.35 |                                                                            |
| AICc   | 0.64  | 0.39 | 0.63            | 0.41 | 0.29             | 0.20 | 0.77        | 0.55 |               |      |                                                                            |
| AIC    | 0.94  | 0.92 | 0.94            | 0.91 | 0.94             | 0.90 | 0.90        | 0.81 |               |      |                                                                            |
| BIC    | 0.01  | 0.01 | 0.01            | 0.01 | 0.00             | 0.00 | 0.06        | 0.03 |               |      |                                                                            |
| CV.lse | 0.07  | 0.03 | 0.03            | 0.01 | 0.00             | 0.00 | 0.67        | 0.41 | 0.07          | 0.03 | $\text{sd}(\mu)/\sigma = 0.5$<br>$\rho = 0.9$<br>$\bar{s}_{Oracle} = 56.5$ |
| CV.min | 0.61  | 0.36 | 0.37            | 0.18 | 0.09             | 0.04 | 0.81        | 0.60 | 0.58          | 0.34 |                                                                            |
| AICc   | 0.66  | 0.40 | 0.64            | 0.41 | 0.27             | 0.19 | 0.77        | 0.54 |               |      |                                                                            |
| AIC    | 0.94  | 0.92 | 0.94            | 0.91 | 0.94             | 0.90 | 0.90        | 0.80 |               |      |                                                                            |
| BIC    | 0.01  | 0.01 | 0.01            | 0.01 | 0.00             | 0.00 | 0.07        | 0.03 |               |      |                                                                            |

Table 102: **FDR | Sensitivity for n=1000, binary design, dense covariates, and decay 100.**

|        | lasso |      | GL $\gamma = 1$ |      | GL $\gamma = 10$ |      | marginal AL |      | sparsenet MCP |      |                                                                            |
|--------|-------|------|-----------------|------|------------------|------|-------------|------|---------------|------|----------------------------------------------------------------------------|
| CV.lse | 0.47  | 0.74 | 0.36            | 0.68 | 0.15             | 0.52 | 0.41        | 0.64 | 0.38          | 0.70 | $\text{sd}(\mu)/\sigma = 2$<br>$\rho = 0$<br>$\bar{s}_{Oracle} = 208.7$    |
| CV.min | 0.58  | 0.82 | 0.50            | 0.78 | 0.26             | 0.62 | 0.51        | 0.71 | 0.54          | 0.80 |                                                                            |
| AICc   | 0.46  | 0.73 | 0.41            | 0.71 | 0.41             | 0.71 | 0.45        | 0.67 |               |      |                                                                            |
| AIC    | 0.75  | 0.93 | 0.75            | 0.92 | 0.75             | 0.89 | 0.57        | 0.76 |               |      |                                                                            |
| BIC    | 0.06  | 0.20 | 0.09            | 0.38 | 0.08             | 0.43 | 0.18        | 0.42 |               |      |                                                                            |
| CV.lse | 0.49  | 0.74 | 0.39            | 0.68 | 0.16             | 0.52 | 0.44        | 0.63 | 0.36          | 0.68 | $\text{sd}(\mu)/\sigma = 2$<br>$\rho = 0.5$<br>$\bar{s}_{Oracle} = 208.8$  |
| CV.min | 0.59  | 0.82 | 0.52            | 0.78 | 0.27             | 0.62 | 0.52        | 0.71 | 0.52          | 0.79 |                                                                            |
| AICc   | 0.48  | 0.72 | 0.42            | 0.71 | 0.40             | 0.71 | 0.47        | 0.66 |               |      |                                                                            |
| AIC    | 0.75  | 0.93 | 0.75            | 0.93 | 0.75             | 0.90 | 0.58        | 0.76 |               |      |                                                                            |
| BIC    | 0.03  | 0.10 | 0.10            | 0.35 | 0.09             | 0.43 | 0.20        | 0.39 |               |      |                                                                            |
| CV.lse | 0.50  | 0.74 | 0.40            | 0.68 | 0.18             | 0.52 | 0.44        | 0.62 | 0.38          | 0.68 | $\text{sd}(\mu)/\sigma = 2$<br>$\rho = 0.9$<br>$\bar{s}_{Oracle} = 209.4$  |
| CV.min | 0.60  | 0.82 | 0.52            | 0.78 | 0.29             | 0.62 | 0.53        | 0.70 | 0.53          | 0.79 |                                                                            |
| AICc   | 0.48  | 0.72 | 0.43            | 0.71 | 0.41             | 0.70 | 0.47        | 0.65 |               |      |                                                                            |
| AIC    | 0.75  | 0.93 | 0.75            | 0.93 | 0.75             | 0.90 | 0.59        | 0.75 |               |      |                                                                            |
| BIC    | 0.03  | 0.08 | 0.11            | 0.33 | 0.11             | 0.43 | 0.21        | 0.38 |               |      |                                                                            |
| CV.lse | 0.41  | 0.47 | 0.25            | 0.33 | 0.06             | 0.10 | 0.51        | 0.56 | 0.40          | 0.47 | $\text{sd}(\mu)/\sigma = 1$<br>$\rho = 0$<br>$\bar{s}_{Oracle} = 143.3$    |
| CV.min | 0.60  | 0.67 | 0.47            | 0.54 | 0.18             | 0.24 | 0.62        | 0.67 | 0.60          | 0.67 |                                                                            |
| AICc   | 0.53  | 0.59 | 0.51            | 0.58 | 0.61             | 0.61 | 0.56        | 0.61 |               |      |                                                                            |
| AIC    | 0.84  | 0.92 | 0.84            | 0.91 | 0.85             | 0.89 | 0.74        | 0.80 |               |      |                                                                            |
| BIC    | 0.00  | 0.01 | 0.01            | 0.02 | 0.00             | 0.00 | 0.05        | 0.09 |               |      |                                                                            |
| CV.lse | 0.42  | 0.45 | 0.27            | 0.32 | 0.06             | 0.09 | 0.53        | 0.54 | 0.41          | 0.44 | $\text{sd}(\mu)/\sigma = 1$<br>$\rho = 0.5$<br>$\bar{s}_{Oracle} = 144.0$  |
| CV.min | 0.62  | 0.66 | 0.49            | 0.54 | 0.17             | 0.22 | 0.63        | 0.66 | 0.61          | 0.66 |                                                                            |
| AICc   | 0.54  | 0.57 | 0.52            | 0.57 | 0.61             | 0.61 | 0.58        | 0.60 |               |      |                                                                            |
| AIC    | 0.84  | 0.93 | 0.84            | 0.91 | 0.85             | 0.89 | 0.75        | 0.79 |               |      |                                                                            |
| BIC    | 0.00  | 0.01 | 0.01            | 0.01 | 0.00             | 0.00 | 0.05        | 0.06 |               |      |                                                                            |
| CV.lse | 0.44  | 0.45 | 0.30            | 0.32 | 0.06             | 0.07 | 0.54        | 0.53 | 0.42          | 0.43 | $\text{sd}(\mu)/\sigma = 1$<br>$\rho = 0.9$<br>$\bar{s}_{Oracle} = 143.6$  |
| CV.min | 0.62  | 0.66 | 0.51            | 0.54 | 0.19             | 0.22 | 0.63        | 0.65 | 0.62          | 0.66 |                                                                            |
| AICc   | 0.55  | 0.56 | 0.53            | 0.57 | 0.61             | 0.61 | 0.59        | 0.59 |               |      |                                                                            |
| AIC    | 0.84  | 0.93 | 0.84            | 0.91 | 0.85             | 0.89 | 0.75        | 0.79 |               |      |                                                                            |
| BIC    | 0.00  | 0.00 | 0.00            | 0.01 | 0.00             | 0.00 | 0.05        | 0.06 |               |      |                                                                            |
| CV.lse | 0.04  | 0.01 | 0.01            | 0.00 | 0.00             | 0.00 | 0.67        | 0.33 | 0.14          | 0.01 | $\text{sd}(\mu)/\sigma = 0.5$<br>$\rho = 0$<br>$\bar{s}_{Oracle} = 77.9$   |
| CV.min | 0.54  | 0.23 | 0.20            | 0.05 | 0.06             | 0.01 | 0.79        | 0.53 | 0.54          | 0.23 |                                                                            |
| AICc   | 0.60  | 0.27 | 0.64            | 0.33 | 0.15             | 0.09 | 0.75        | 0.44 |               |      |                                                                            |
| AIC    | 0.92  | 0.91 | 0.92            | 0.89 | 0.92             | 0.90 | 0.88        | 0.76 |               |      |                                                                            |
| BIC    | 0.01  | 0.00 | 0.00            | 0.00 | 0.00             | 0.00 | 0.05        | 0.01 |               |      |                                                                            |
| CV.lse | 0.03  | 0.01 | 0.00            | 0.00 | 0.00             | 0.00 | 0.68        | 0.31 | 0.15          | 0.01 | $\text{sd}(\mu)/\sigma = 0.5$<br>$\rho = 0.5$<br>$\bar{s}_{Oracle} = 78.0$ |
| CV.min | 0.51  | 0.18 | 0.19            | 0.04 | 0.06             | 0.01 | 0.80        | 0.51 | 0.51          | 0.17 |                                                                            |
| AICc   | 0.59  | 0.23 | 0.61            | 0.30 | 0.17             | 0.10 | 0.76        | 0.43 |               |      |                                                                            |
| AIC    | 0.92  | 0.92 | 0.92            | 0.90 | 0.92             | 0.90 | 0.89        | 0.77 |               |      |                                                                            |
| BIC    | 0.00  | 0.00 | 0.00            | 0.00 | 0.00             | 0.00 | 0.06        | 0.01 |               |      |                                                                            |
| CV.lse | 0.02  | 0.01 | 0.01            | 0.00 | 0.00             | 0.00 | 0.69        | 0.29 | 0.14          | 0.01 | $\text{sd}(\mu)/\sigma = 0.5$<br>$\rho = 0.9$<br>$\bar{s}_{Oracle} = 77.5$ |
| CV.min | 0.50  | 0.17 | 0.19            | 0.04 | 0.07             | 0.01 | 0.80        | 0.49 | 0.52          | 0.17 |                                                                            |
| AICc   | 0.60  | 0.23 | 0.62            | 0.29 | 0.16             | 0.09 | 0.76        | 0.41 |               |      |                                                                            |
| AIC    | 0.92  | 0.91 | 0.92            | 0.89 | 0.92             | 0.90 | 0.89        | 0.76 |               |      |                                                                            |
| BIC    | 0.01  | 0.00 | 0.00            | 0.00 | 0.00             | 0.00 | 0.07        | 0.01 |               |      |                                                                            |

Table 103: **FDR | Sensitivity for n=1000, binary design, dense covariates, and decay 200.**

|        | lasso |      | GL $\gamma = 1$ |      | GL $\gamma = 10$ |      | marginal AL |      | sparsenet MCP |      |                                                                            |
|--------|-------|------|-----------------|------|------------------|------|-------------|------|---------------|------|----------------------------------------------------------------------------|
| CV.lse | 0.44  | 0.72 | 0.35            | 0.62 | 0.22             | 0.39 | 0.39        | 0.62 | 0.46          | 0.75 | $\text{sd}(\mu)/\sigma = 2$<br>$\rho = 0$<br>$\bar{s}_{Oracle} = 293.1$    |
| CV.min | 0.53  | 0.82 | 0.46            | 0.75 | 0.33             | 0.55 | 0.46        | 0.70 | 0.55          | 0.84 |                                                                            |
| AICc   | 0.39  | 0.65 | 0.37            | 0.64 | 0.42             | 0.66 | 0.39        | 0.62 |               |      |                                                                            |
| AIC    | 0.67  | 0.93 | 0.67            | 0.92 | 0.67             | 0.88 | 0.52        | 0.77 |               |      |                                                                            |
| BIC    | 0.00  | 0.00 | 0.00            | 0.01 | 0.13             | 0.23 | 0.03        | 0.04 |               |      |                                                                            |
| CV.lse | 0.45  | 0.71 | 0.37            | 0.61 | 0.22             | 0.38 | 0.41        | 0.60 | 0.46          | 0.74 | $\text{sd}(\mu)/\sigma = 2$<br>$\rho = 0.5$<br>$\bar{s}_{Oracle} = 293.7$  |
| CV.min | 0.54  | 0.82 | 0.47            | 0.75 | 0.33             | 0.54 | 0.47        | 0.69 | 0.55          | 0.84 |                                                                            |
| AICc   | 0.40  | 0.63 | 0.38            | 0.64 | 0.42             | 0.66 | 0.41        | 0.61 |               |      |                                                                            |
| AIC    | 0.67  | 0.93 | 0.67            | 0.92 | 0.67             | 0.89 | 0.53        | 0.76 |               |      |                                                                            |
| BIC    | 0.00  | 0.00 | 0.00            | 0.00 | 0.11             | 0.19 | 0.02        | 0.03 |               |      |                                                                            |
| CV.lse | 0.46  | 0.72 | 0.38            | 0.61 | 0.23             | 0.36 | 0.41        | 0.59 | 0.47          | 0.74 | $\text{sd}(\mu)/\sigma = 2$<br>$\rho = 0.9$<br>$\bar{s}_{Oracle} = 293.3$  |
| CV.min | 0.54  | 0.82 | 0.47            | 0.75 | 0.34             | 0.54 | 0.47        | 0.68 | 0.56          | 0.84 |                                                                            |
| AICc   | 0.40  | 0.63 | 0.38            | 0.63 | 0.42             | 0.66 | 0.41        | 0.59 |               |      |                                                                            |
| AIC    | 0.67  | 0.93 | 0.67            | 0.92 | 0.67             | 0.89 | 0.53        | 0.76 |               |      |                                                                            |
| BIC    | 0.00  | 0.00 | 0.00            | 0.00 | 0.11             | 0.17 | 0.02        | 0.02 |               |      |                                                                            |
| CV.lse | 0.35  | 0.28 | 0.12            | 0.08 | 0.00             | 0.00 | 0.48        | 0.44 | 0.36          | 0.29 | $\text{sd}(\mu)/\sigma = 1$<br>$\rho = 0$<br>$\bar{s}_{Oracle} = 217.0$    |
| CV.min | 0.54  | 0.54 | 0.34            | 0.28 | 0.05             | 0.02 | 0.56        | 0.57 | 0.55          | 0.55 |                                                                            |
| AICc   | 0.46  | 0.41 | 0.49            | 0.45 | 0.60             | 0.51 | 0.51        | 0.48 |               |      |                                                                            |
| AIC    | 0.77  | 0.91 | 0.77            | 0.89 | 0.78             | 0.88 | 0.68        | 0.75 |               |      |                                                                            |
| BIC    | 0.00  | 0.00 | 0.00            | 0.00 | 0.00             | 0.00 | 0.02        | 0.01 |               |      |                                                                            |
| CV.lse | 0.33  | 0.23 | 0.09            | 0.05 | 0.00             | 0.00 | 0.50        | 0.43 | 0.34          | 0.24 | $\text{sd}(\mu)/\sigma = 1$<br>$\rho = 0.5$<br>$\bar{s}_{Oracle} = 214.8$  |
| CV.min | 0.55  | 0.52 | 0.33            | 0.23 | 0.04             | 0.01 | 0.58        | 0.56 | 0.55          | 0.52 |                                                                            |
| AICc   | 0.47  | 0.38 | 0.50            | 0.44 | 0.60             | 0.52 | 0.52        | 0.47 |               |      |                                                                            |
| AIC    | 0.77  | 0.91 | 0.77            | 0.89 | 0.78             | 0.88 | 0.69        | 0.75 |               |      |                                                                            |
| BIC    | 0.00  | 0.00 | 0.00            | 0.00 | 0.00             | 0.00 | 0.02        | 0.01 |               |      |                                                                            |
| CV.lse | 0.34  | 0.22 | 0.10            | 0.05 | 0.00             | 0.00 | 0.51        | 0.42 | 0.35          | 0.23 | $\text{sd}(\mu)/\sigma = 1$<br>$\rho = 0.9$<br>$\bar{s}_{Oracle} = 215.0$  |
| CV.min | 0.55  | 0.51 | 0.35            | 0.24 | 0.04             | 0.01 | 0.58        | 0.55 | 0.55          | 0.52 |                                                                            |
| AICc   | 0.48  | 0.38 | 0.51            | 0.43 | 0.60             | 0.51 | 0.53        | 0.46 |               |      |                                                                            |
| AIC    | 0.77  | 0.91 | 0.77            | 0.89 | 0.78             | 0.88 | 0.69        | 0.74 |               |      |                                                                            |
| BIC    | 0.00  | 0.00 | 0.00            | 0.00 | 0.00             | 0.00 | 0.02        | 0.01 |               |      |                                                                            |
| CV.lse | 0.03  | 0.00 | 0.00            | 0.00 | 0.00             | 0.00 | 0.72        | 0.24 | 0.22          | 0.01 | $\text{sd}(\mu)/\sigma = 0.5$<br>$\rho = 0$<br>$\bar{s}_{Oracle} = 90.7$   |
| CV.min | 0.51  | 0.12 | 0.16            | 0.01 | 0.07             | 0.00 | 0.81        | 0.43 | 0.54          | 0.12 |                                                                            |
| AICc   | 0.61  | 0.15 | 0.68            | 0.27 | 0.07             | 0.04 | 0.78        | 0.35 |               |      |                                                                            |
| AIC    | 0.91  | 0.91 | 0.91            | 0.89 | 0.91             | 0.91 | 0.88        | 0.71 |               |      |                                                                            |
| BIC    | 0.01  | 0.00 | 0.00            | 0.00 | 0.02             | 0.02 | 0.09        | 0.00 |               |      |                                                                            |
| CV.lse | 0.02  | 0.00 | 0.00            | 0.00 | 0.00             | 0.00 | 0.73        | 0.23 | 0.24          | 0.00 | $\text{sd}(\mu)/\sigma = 0.5$<br>$\rho = 0.5$<br>$\bar{s}_{Oracle} = 91.4$ |
| CV.min | 0.47  | 0.09 | 0.15            | 0.01 | 0.07             | 0.00 | 0.81        | 0.41 | 0.52          | 0.09 |                                                                            |
| AICc   | 0.59  | 0.12 | 0.65            | 0.24 | 0.07             | 0.04 | 0.78        | 0.33 |               |      |                                                                            |
| AIC    | 0.91  | 0.91 | 0.91            | 0.89 | 0.91             | 0.91 | 0.88        | 0.71 |               |      |                                                                            |
| BIC    | 0.01  | 0.00 | 0.00            | 0.00 | 0.01             | 0.01 | 0.07        | 0.00 |               |      |                                                                            |
| CV.lse | 0.01  | 0.00 | 0.00            | 0.00 | 0.00             | 0.00 | 0.72        | 0.21 | 0.24          | 0.00 | $\text{sd}(\mu)/\sigma = 0.5$<br>$\rho = 0.9$<br>$\bar{s}_{Oracle} = 89.5$ |
| CV.min | 0.47  | 0.09 | 0.16            | 0.01 | 0.06             | 0.00 | 0.81        | 0.40 | 0.51          | 0.08 |                                                                            |
| AICc   | 0.58  | 0.12 | 0.65            | 0.24 | 0.07             | 0.04 | 0.79        | 0.32 |               |      |                                                                            |
| AIC    | 0.91  | 0.90 | 0.91            | 0.89 | 0.91             | 0.90 | 0.88        | 0.71 |               |      |                                                                            |
| BIC    | 0.01  | 0.00 | 0.00            | 0.00 | 0.01             | 0.01 | 0.09        | 0.00 |               |      |                                                                            |

Table 104: **FDR | Sensitivity for n=1000, continuous design, dense covariates, and decay 10.**

|        | lasso |      | GL $\gamma = 1$ |      | GL $\gamma = 10$ |      | marginal AL |      | sparsenet MCP |      |                                                                            |
|--------|-------|------|-----------------|------|------------------|------|-------------|------|---------------|------|----------------------------------------------------------------------------|
| CV.lse | 0.36  | 0.74 | 0.21            | 0.71 | 0.02             | 0.60 | 0.24        | 0.65 | 0.00          | 0.57 | $\text{sd}(\mu)/\sigma = 2$<br>$\rho = 0$<br>$\bar{s}_{Oracle} = 33.2$     |
| CV.min | 0.72  | 0.85 | 0.64            | 0.83 | 0.22             | 0.72 | 0.55        | 0.73 | 0.20          | 0.71 |                                                                            |
| AICc   | 0.70  | 0.84 | 0.60            | 0.82 | 0.10             | 0.67 | 0.52        | 0.72 |               |      |                                                                            |
| AIC    | 0.95  | 0.95 | 0.95            | 0.95 | 0.95             | 0.94 | 0.53        | 0.72 |               |      |                                                                            |
| BIC    | 0.22  | 0.70 | 0.12            | 0.68 | 0.00             | 0.57 | 0.18        | 0.63 |               |      |                                                                            |
| CV.lse | 0.72  | 0.70 | 0.61            | 0.66 | 0.17             | 0.56 | 0.51        | 0.51 | 0.04          | 0.55 | $\text{sd}(\mu)/\sigma = 2$<br>$\rho = 0.5$<br>$\bar{s}_{Oracle} = 32.9$   |
| CV.min | 0.85  | 0.81 | 0.81            | 0.77 | 0.53             | 0.67 | 0.60        | 0.55 | 0.25          | 0.63 |                                                                            |
| AICc   | 0.82  | 0.78 | 0.78            | 0.75 | 0.44             | 0.65 | 0.60        | 0.55 |               |      |                                                                            |
| AIC    | 0.94  | 0.95 | 0.94            | 0.95 | 0.94             | 0.94 | 0.60        | 0.55 |               |      |                                                                            |
| BIC    | 0.49  | 0.59 | 0.36            | 0.57 | 0.05             | 0.49 | 0.49        | 0.51 |               |      |                                                                            |
| CV.lse | 0.87  | 0.65 | 0.85            | 0.60 | 0.73             | 0.50 | 0.04        | 0.37 | 0.48          | 0.50 | $\text{sd}(\mu)/\sigma = 2$<br>$\rho = 0.9$<br>$\bar{s}_{Oracle} = 30.4$   |
| CV.min | 0.90  | 0.76 | 0.89            | 0.73 | 0.81             | 0.60 | 0.06        | 0.39 | 0.66          | 0.57 |                                                                            |
| AICc   | 0.89  | 0.72 | 0.87            | 0.68 | 0.78             | 0.57 | 0.06        | 0.39 |               |      |                                                                            |
| AIC    | 0.90  | 0.79 | 0.90            | 0.79 | 0.88             | 0.77 | 0.06        | 0.39 |               |      |                                                                            |
| BIC    | 0.80  | 0.43 | 0.78            | 0.40 | 0.49             | 0.31 | 0.06        | 0.39 |               |      |                                                                            |
| CV.lse | 0.27  | 0.64 | 0.13            | 0.59 | 0.01             | 0.48 | 0.47        | 0.68 | 0.01          | 0.47 | $\text{sd}(\mu)/\sigma = 1$<br>$\rho = 0$<br>$\bar{s}_{Oracle} = 26.2$     |
| CV.min | 0.72  | 0.79 | 0.61            | 0.76 | 0.15             | 0.61 | 0.81        | 0.81 | 0.26          | 0.65 |                                                                            |
| AICc   | 0.72  | 0.79 | 0.57            | 0.75 | 0.03             | 0.52 | 0.77        | 0.79 |               |      |                                                                            |
| AIC    | 0.97  | 0.95 | 0.97            | 0.95 | 0.97             | 0.93 | 0.85        | 0.83 |               |      |                                                                            |
| BIC    | 0.19  | 0.61 | 0.07            | 0.57 | 0.00             | 0.40 | 0.16        | 0.58 |               |      |                                                                            |
| CV.lse | 0.66  | 0.55 | 0.53            | 0.51 | 0.12             | 0.42 | 0.76        | 0.57 | 0.07          | 0.44 | $\text{sd}(\mu)/\sigma = 1$<br>$\rho = 0.5$<br>$\bar{s}_{Oracle} = 25.8$   |
| CV.min | 0.85  | 0.72 | 0.81            | 0.68 | 0.43             | 0.54 | 0.86        | 0.67 | 0.33          | 0.55 |                                                                            |
| AICc   | 0.84  | 0.70 | 0.79            | 0.66 | 0.31             | 0.51 | 0.85        | 0.65 |               |      |                                                                            |
| AIC    | 0.96  | 0.96 | 0.96            | 0.95 | 0.96             | 0.94 | 0.87        | 0.67 |               |      |                                                                            |
| BIC    | 0.41  | 0.44 | 0.29            | 0.41 | 0.02             | 0.32 | 0.51        | 0.43 |               |      |                                                                            |
| CV.lse | 0.68  | 0.31 | 0.80            | 0.34 | 0.77             | 0.33 | 0.32        | 0.44 | 0.61          | 0.35 | $\text{sd}(\mu)/\sigma = 1$<br>$\rho = 0.9$<br>$\bar{s}_{Oracle} = 23.3$   |
| CV.min | 0.90  | 0.59 | 0.90            | 0.56 | 0.84             | 0.45 | 0.53        | 0.54 | 0.76          | 0.45 |                                                                            |
| AICc   | 0.91  | 0.56 | 0.89            | 0.51 | 0.77             | 0.39 | 0.53        | 0.54 |               |      |                                                                            |
| AIC    | 0.95  | 0.86 | 0.95            | 0.88 | 0.94             | 0.88 | 0.53        | 0.54 |               |      |                                                                            |
| BIC    | 0.08  | 0.05 | 0.01            | 0.04 | 0.01             | 0.05 | 0.34        | 0.45 |               |      |                                                                            |
| CV.lse | 0.12  | 0.38 | 0.06            | 0.34 | 0.01             | 0.26 | 0.63        | 0.64 | 0.01          | 0.27 | $\text{sd}(\mu)/\sigma = 0.5$<br>$\rho = 0$<br>$\bar{s}_{Oracle} = 19.2$   |
| CV.min | 0.70  | 0.67 | 0.55            | 0.60 | 0.14             | 0.43 | 0.89        | 0.81 | 0.37          | 0.54 |                                                                            |
| AICc   | 0.73  | 0.69 | 0.43            | 0.57 | 0.01             | 0.22 | 0.85        | 0.77 |               |      |                                                                            |
| AIC    | 0.98  | 0.95 | 0.98            | 0.94 | 0.98             | 0.91 | 0.94        | 0.88 |               |      |                                                                            |
| BIC    | 0.13  | 0.41 | 0.03            | 0.33 | 0.00             | 0.09 | 0.17        | 0.44 |               |      |                                                                            |
| CV.lse | 0.16  | 0.11 | 0.19            | 0.15 | 0.07             | 0.14 | 0.80        | 0.42 | 0.10          | 0.22 | $\text{sd}(\mu)/\sigma = 0.5$<br>$\rho = 0.5$<br>$\bar{s}_{Oracle} = 19.0$ |
| CV.min | 0.81  | 0.46 | 0.78            | 0.44 | 0.35             | 0.30 | 0.92        | 0.61 | 0.44          | 0.37 |                                                                            |
| AICc   | 0.84  | 0.50 | 0.71            | 0.41 | 0.04             | 0.13 | 0.90        | 0.57 |               |      |                                                                            |
| AIC    | 0.98  | 0.95 | 0.98            | 0.95 | 0.98             | 0.93 | 0.94        | 0.74 |               |      |                                                                            |
| BIC    | 0.10  | 0.11 | 0.04            | 0.09 | 0.00             | 0.05 | 0.17        | 0.12 |               |      |                                                                            |
| CV.lse | 0.00  | 0.07 | 0.00            | 0.07 | 0.00             | 0.07 | 0.45        | 0.28 | 0.01          | 0.07 | $\text{sd}(\mu)/\sigma = 0.5$<br>$\rho = 0.9$<br>$\bar{s}_{Oracle} = 16.4$ |
| CV.min | 0.57  | 0.09 | 0.45            | 0.08 | 0.16             | 0.07 | 0.82        | 0.64 | 0.35          | 0.12 |                                                                            |
| AICc   | 0.70  | 0.10 | 0.20            | 0.07 | 0.00             | 0.07 | 0.81        | 0.64 |               |      |                                                                            |
| AIC    | 0.96  | 0.86 | 0.97            | 0.90 | 0.97             | 0.88 | 0.83        | 0.68 |               |      |                                                                            |
| BIC    | 0.09  | 0.07 | 0.01            | 0.07 | 0.00             | 0.07 | 0.13        | 0.12 |               |      |                                                                            |



Table 105: **FDR | Sensitivity for n=1000, continuous design, dense covariates, and decay 50.**

|        | lasso |      | GL $\gamma = 1$ |      | GL $\gamma = 10$ |      | marginal AL |      | sparsenet MCP |      |                                                                            |
|--------|-------|------|-----------------|------|------------------|------|-------------|------|---------------|------|----------------------------------------------------------------------------|
| CV.lse | 0.50  | 0.76 | 0.36            | 0.71 | 0.07             | 0.56 | 0.44        | 0.67 | 0.15          | 0.62 | $\text{sd}(\mu)/\sigma = 2$<br>$\rho = 0$<br>$\bar{s}_{Oracle} = 122.8$    |
| CV.min | 0.65  | 0.84 | 0.56            | 0.81 | 0.19             | 0.65 | 0.58        | 0.74 | 0.39          | 0.74 |                                                                            |
| AICc   | 0.55  | 0.79 | 0.47            | 0.77 | 0.29             | 0.70 | 0.53        | 0.72 |               |      |                                                                            |
| AIC    | 0.84  | 0.94 | 0.84            | 0.94 | 0.84             | 0.91 | 0.63        | 0.77 |               |      |                                                                            |
| BIC    | 0.21  | 0.59 | 0.11            | 0.55 | 0.01             | 0.43 | 0.22        | 0.55 |               |      |                                                                            |
| CV.lse | 0.68  | 0.74 | 0.62            | 0.70 | 0.33             | 0.56 | 0.65        | 0.58 | 0.24          | 0.55 | $\text{sd}(\mu)/\sigma = 2$<br>$\rho = 0.5$<br>$\bar{s}_{Oracle} = 122.5$  |
| CV.min | 0.74  | 0.84 | 0.70            | 0.80 | 0.47             | 0.66 | 0.69        | 0.65 | 0.42          | 0.64 |                                                                            |
| AICc   | 0.68  | 0.74 | 0.63            | 0.72 | 0.48             | 0.68 | 0.67        | 0.62 |               |      |                                                                            |
| AIC    | 0.84  | 0.95 | 0.84            | 0.94 | 0.83             | 0.93 | 0.70        | 0.67 |               |      |                                                                            |
| BIC    | 0.25  | 0.23 | 0.35            | 0.39 | 0.15             | 0.41 | 0.46        | 0.35 |               |      |                                                                            |
| CV.lse | 0.74  | 0.74 | 0.71            | 0.70 | 0.60             | 0.58 | 0.56        | 0.17 | 0.54          | 0.54 | $\text{sd}(\mu)/\sigma = 2$<br>$\rho = 0.9$<br>$\bar{s}_{Oracle} = 119.5$  |
| CV.min | 0.77  | 0.83 | 0.75            | 0.80 | 0.64             | 0.67 | 0.61        | 0.21 | 0.59          | 0.61 |                                                                            |
| AICc   | 0.73  | 0.72 | 0.71            | 0.70 | 0.62             | 0.65 | 0.61        | 0.20 |               |      |                                                                            |
| AIC    | 0.77  | 0.83 | 0.77            | 0.84 | 0.74             | 0.84 | 0.61        | 0.21 |               |      |                                                                            |
| BIC    | 0.05  | 0.01 | 0.01            | 0.01 | 0.00             | 0.01 | 0.47        | 0.14 |               |      |                                                                            |
| CV.lse | 0.43  | 0.58 | 0.27            | 0.50 | 0.07             | 0.33 | 0.52        | 0.62 | 0.26          | 0.49 | $\text{sd}(\mu)/\sigma = 1$<br>$\rho = 0$<br>$\bar{s}_{Oracle} = 90.2$     |
| CV.min | 0.66  | 0.73 | 0.54            | 0.66 | 0.19             | 0.45 | 0.68        | 0.73 | 0.57          | 0.68 |                                                                            |
| AICc   | 0.60  | 0.69 | 0.50            | 0.65 | 0.32             | 0.51 | 0.62        | 0.69 |               |      |                                                                            |
| AIC    | 0.90  | 0.93 | 0.90            | 0.92 | 0.90             | 0.90 | 0.79        | 0.82 |               |      |                                                                            |
| BIC    | 0.07  | 0.24 | 0.03            | 0.23 | 0.00             | 0.01 | 0.17        | 0.38 |               |      |                                                                            |
| CV.lse | 0.62  | 0.41 | 0.60            | 0.41 | 0.33             | 0.28 | 0.71        | 0.48 | 0.38          | 0.37 | $\text{sd}(\mu)/\sigma = 1$<br>$\rho = 0.5$<br>$\bar{s}_{Oracle} = 89.7$   |
| CV.min | 0.76  | 0.66 | 0.72            | 0.62 | 0.48             | 0.42 | 0.77        | 0.60 | 0.54          | 0.49 |                                                                            |
| AICc   | 0.72  | 0.57 | 0.69            | 0.57 | 0.59             | 0.56 | 0.75        | 0.55 |               |      |                                                                            |
| AIC    | 0.90  | 0.95 | 0.90            | 0.94 | 0.90             | 0.92 | 0.82        | 0.75 |               |      |                                                                            |
| BIC    | 0.01  | 0.01 | 0.00            | 0.01 | 0.00             | 0.00 | 0.09        | 0.04 |               |      |                                                                            |
| CV.lse | 0.06  | 0.04 | 0.18            | 0.10 | 0.18             | 0.10 | 0.65        | 0.18 | 0.61          | 0.30 | $\text{sd}(\mu)/\sigma = 1$<br>$\rho = 0.9$<br>$\bar{s}_{Oracle} = 86.2$   |
| CV.min | 0.59  | 0.20 | 0.63            | 0.35 | 0.43             | 0.24 | 0.73        | 0.29 | 0.72          | 0.43 |                                                                            |
| AICc   | 0.67  | 0.16 | 0.32            | 0.14 | 0.21             | 0.16 | 0.73        | 0.28 |               |      |                                                                            |
| AIC    | 0.87  | 0.88 | 0.86            | 0.88 | 0.86             | 0.85 | 0.73        | 0.29 |               |      |                                                                            |
| BIC    | 0.06  | 0.01 | 0.01            | 0.01 | 0.00             | 0.01 | 0.11        | 0.03 |               |      |                                                                            |
| CV.lse | 0.09  | 0.06 | 0.03            | 0.02 | 0.00             | 0.00 | 0.65        | 0.45 | 0.07          | 0.05 | $\text{sd}(\mu)/\sigma = 0.5$<br>$\rho = 0$<br>$\bar{s}_{Oracle} = 55.9$   |
| CV.min | 0.61  | 0.41 | 0.36            | 0.23 | 0.07             | 0.05 | 0.81        | 0.64 | 0.59          | 0.40 |                                                                            |
| AICc   | 0.63  | 0.43 | 0.30            | 0.21 | 0.00             | 0.00 | 0.76        | 0.57 |               |      |                                                                            |
| AIC    | 0.94  | 0.92 | 0.94            | 0.90 | 0.94             | 0.90 | 0.90        | 0.81 |               |      |                                                                            |
| BIC    | 0.01  | 0.01 | 0.00            | 0.00 | 0.00             | 0.00 | 0.06        | 0.04 |               |      |                                                                            |
| CV.lse | 0.01  | 0.00 | 0.00            | 0.00 | 0.00             | 0.00 | 0.68        | 0.16 | 0.16          | 0.01 | $\text{sd}(\mu)/\sigma = 0.5$<br>$\rho = 0.5$<br>$\bar{s}_{Oracle} = 55.6$ |
| CV.min | 0.44  | 0.07 | 0.31            | 0.04 | 0.10             | 0.01 | 0.85        | 0.38 | 0.47          | 0.07 |                                                                            |
| AICc   | 0.63  | 0.13 | 0.11            | 0.02 | 0.00             | 0.00 | 0.84        | 0.32 |               |      |                                                                            |
| AIC    | 0.94  | 0.94 | 0.94            | 0.93 | 0.94             | 0.91 | 0.91        | 0.74 |               |      |                                                                            |
| BIC    | 0.02  | 0.00 | 0.00            | 0.00 | 0.00             | 0.00 | 0.09        | 0.01 |               |      |                                                                            |
| CV.lse | 0.00  | 0.00 | 0.00            | 0.00 | 0.00             | 0.01 | 0.14        | 0.03 | 0.00          | 0.01 | $\text{sd}(\mu)/\sigma = 0.5$<br>$\rho = 0.9$<br>$\bar{s}_{Oracle} = 52.3$ |
| CV.min | 0.54  | 0.04 | 0.44            | 0.03 | 0.10             | 0.02 | 0.82        | 0.16 | 0.17          | 0.02 |                                                                            |
| AICc   | 0.66  | 0.05 | 0.12            | 0.02 | 0.00             | 0.02 | 0.82        | 0.18 |               |      |                                                                            |
| AIC    | 0.93  | 0.88 | 0.93            | 0.87 | 0.94             | 0.83 | 0.84        | 0.29 |               |      |                                                                            |
| BIC    | 0.06  | 0.02 | 0.01            | 0.02 | 0.00             | 0.01 | 0.09        | 0.03 |               |      |                                                                            |

Table 106: **FDR | Sensitivity for n=1000, continuous design, dense covariates, and decay 100.**

|        | lasso |      | GL $\gamma = 1$ |      | GL $\gamma = 10$ |      | marginal AL |      | sparsenet MCP |      |                                                                            |
|--------|-------|------|-----------------|------|------------------|------|-------------|------|---------------|------|----------------------------------------------------------------------------|
| CV.lse | 0.47  | 0.74 | 0.36            | 0.68 | 0.15             | 0.52 | 0.41        | 0.64 | 0.38          | 0.70 | $\text{sd}(\mu)/\sigma = 2$<br>$\rho = 0$<br>$\bar{s}_{Oracle} = 209.8$    |
| CV.min | 0.58  | 0.82 | 0.50            | 0.77 | 0.26             | 0.61 | 0.51        | 0.71 | 0.54          | 0.80 |                                                                            |
| AICc   | 0.46  | 0.73 | 0.40            | 0.70 | 0.35             | 0.67 | 0.45        | 0.67 |               |      |                                                                            |
| AIC    | 0.75  | 0.93 | 0.75            | 0.92 | 0.75             | 0.89 | 0.57        | 0.76 |               |      |                                                                            |
| BIC    | 0.06  | 0.21 | 0.08            | 0.34 | 0.08             | 0.41 | 0.19        | 0.42 |               |      |                                                                            |
| CV.lse | 0.60  | 0.72 | 0.55            | 0.67 | 0.38             | 0.55 | 0.58        | 0.52 | 0.37          | 0.55 | $\text{sd}(\mu)/\sigma = 2$<br>$\rho = 0.5$<br>$\bar{s}_{Oracle} = 209.4$  |
| CV.min | 0.66  | 0.82 | 0.61            | 0.79 | 0.46             | 0.65 | 0.62        | 0.62 | 0.44          | 0.62 |                                                                            |
| AICc   | 0.58  | 0.66 | 0.54            | 0.66 | 0.44             | 0.65 | 0.59        | 0.56 |               |      |                                                                            |
| AIC    | 0.75  | 0.94 | 0.75            | 0.94 | 0.74             | 0.92 | 0.65        | 0.69 |               |      |                                                                            |
| BIC    | 0.01  | 0.00 | 0.00            | 0.00 | 0.07             | 0.12 | 0.05        | 0.02 |               |      |                                                                            |
| CV.lse | 0.65  | 0.72 | 0.62            | 0.68 | 0.53             | 0.57 | 0.57        | 0.13 | 0.50          | 0.51 | $\text{sd}(\mu)/\sigma = 2$<br>$\rho = 0.9$<br>$\bar{s}_{Oracle} = 205.7$  |
| CV.min | 0.68  | 0.83 | 0.66            | 0.80 | 0.56             | 0.68 | 0.61        | 0.21 | 0.53          | 0.59 |                                                                            |
| AICc   | 0.63  | 0.62 | 0.61            | 0.65 | 0.54             | 0.65 | 0.61        | 0.20 |               |      |                                                                            |
| AIC    | 0.69  | 0.84 | 0.68            | 0.84 | 0.65             | 0.83 | 0.61        | 0.22 |               |      |                                                                            |
| BIC    | 0.05  | 0.01 | 0.01            | 0.01 | 0.00             | 0.01 | 0.06        | 0.01 |               |      |                                                                            |
| CV.lse | 0.41  | 0.47 | 0.25            | 0.33 | 0.06             | 0.11 | 0.51        | 0.56 | 0.40          | 0.47 | $\text{sd}(\mu)/\sigma = 1$<br>$\rho = 0$<br>$\bar{s}_{Oracle} = 143.5$    |
| CV.min | 0.61  | 0.67 | 0.47            | 0.54 | 0.18             | 0.25 | 0.62        | 0.67 | 0.61          | 0.67 |                                                                            |
| AICc   | 0.53  | 0.58 | 0.48            | 0.55 | 0.48             | 0.49 | 0.56        | 0.61 |               |      |                                                                            |
| AIC    | 0.84  | 0.92 | 0.84            | 0.90 | 0.85             | 0.89 | 0.74        | 0.80 |               |      |                                                                            |
| BIC    | 0.00  | 0.01 | 0.00            | 0.00 | 0.00             | 0.00 | 0.06        | 0.09 |               |      |                                                                            |
| CV.lse | 0.17  | 0.06 | 0.16            | 0.07 | 0.01             | 0.00 | 0.65        | 0.34 | 0.23          | 0.09 | $\text{sd}(\mu)/\sigma = 1$<br>$\rho = 0.5$<br>$\bar{s}_{Oracle} = 143.5$  |
| CV.min | 0.61  | 0.39 | 0.51            | 0.31 | 0.11             | 0.03 | 0.71        | 0.49 | 0.55          | 0.33 |                                                                            |
| AICc   | 0.61  | 0.31 | 0.52            | 0.34 | 0.53             | 0.45 | 0.69        | 0.42 |               |      |                                                                            |
| AIC    | 0.84  | 0.94 | 0.84            | 0.93 | 0.84             | 0.90 | 0.78        | 0.74 |               |      |                                                                            |
| BIC    | 0.01  | 0.00 | 0.00            | 0.00 | 0.00             | 0.00 | 0.06        | 0.01 |               |      |                                                                            |
| CV.lse | 0.00  | 0.00 | 0.00            | 0.00 | 0.00             | 0.00 | 0.38        | 0.05 | 0.01          | 0.01 | $\text{sd}(\mu)/\sigma = 1$<br>$\rho = 0.9$<br>$\bar{s}_{Oracle} = 139.4$  |
| CV.min | 0.48  | 0.02 | 0.40            | 0.02 | 0.08             | 0.01 | 0.71        | 0.19 | 0.21          | 0.04 |                                                                            |
| AICc   | 0.58  | 0.03 | 0.11            | 0.01 | 0.00             | 0.01 | 0.71        | 0.20 |               |      |                                                                            |
| AIC    | 0.81  | 0.87 | 0.81            | 0.86 | 0.81             | 0.83 | 0.73        | 0.29 |               |      |                                                                            |
| BIC    | 0.06  | 0.01 | 0.01            | 0.01 | 0.00             | 0.01 | 0.07        | 0.01 |               |      |                                                                            |
| CV.lse | 0.04  | 0.01 | 0.01            | 0.00 | 0.00             | 0.00 | 0.67        | 0.34 | 0.09          | 0.01 | $\text{sd}(\mu)/\sigma = 0.5$<br>$\rho = 0$<br>$\bar{s}_{Oracle} = 77.7$   |
| CV.min | 0.53  | 0.23 | 0.20            | 0.05 | 0.06             | 0.01 | 0.79        | 0.53 | 0.54          | 0.23 |                                                                            |
| AICc   | 0.60  | 0.27 | 0.14            | 0.07 | 0.00             | 0.00 | 0.75        | 0.45 |               |      |                                                                            |
| AIC    | 0.92  | 0.91 | 0.92            | 0.89 | 0.92             | 0.90 | 0.88        | 0.77 |               |      |                                                                            |
| BIC    | 0.01  | 0.00 | 0.00            | 0.00 | 0.08             | 0.07 | 0.05        | 0.01 |               |      |                                                                            |
| CV.lse | 0.00  | 0.00 | 0.00            | 0.00 | 0.00             | 0.00 | 0.64        | 0.09 | 0.25          | 0.00 | $\text{sd}(\mu)/\sigma = 0.5$<br>$\rho = 0.5$<br>$\bar{s}_{Oracle} = 77.7$ |
| CV.min | 0.38  | 0.03 | 0.22            | 0.01 | 0.08             | 0.00 | 0.84        | 0.28 | 0.48          | 0.03 |                                                                            |
| AICc   | 0.57  | 0.06 | 0.05            | 0.00 | 0.00             | 0.00 | 0.83        | 0.23 |               |      |                                                                            |
| AIC    | 0.92  | 0.92 | 0.92            | 0.91 | 0.92             | 0.90 | 0.89        | 0.70 |               |      |                                                                            |
| BIC    | 0.02  | 0.00 | 0.00            | 0.00 | 0.00             | 0.00 | 0.10        | 0.00 |               |      |                                                                            |
| CV.lse | 0.00  | 0.00 | 0.00            | 0.00 | 0.00             | 0.00 | 0.07        | 0.01 | 0.05          | 0.01 | $\text{sd}(\mu)/\sigma = 0.5$<br>$\rho = 0.9$<br>$\bar{s}_{Oracle} = 73.5$ |
| CV.min | 0.49  | 0.03 | 0.40            | 0.02 | 0.14             | 0.01 | 0.81        | 0.07 | 0.32          | 0.02 |                                                                            |
| AICc   | 0.64  | 0.04 | 0.11            | 0.01 | 0.01             | 0.01 | 0.82        | 0.08 |               |      |                                                                            |
| AIC    | 0.92  | 0.87 | 0.92            | 0.84 | 0.92             | 0.82 | 0.85        | 0.18 |               |      |                                                                            |
| BIC    | 0.04  | 0.01 | 0.01            | 0.01 | 0.00             | 0.00 | 0.11        | 0.01 |               |      |                                                                            |

Table 107: **FDR | Sensitivity for n=1000, continuous design, dense covariates, and decay 200.**

|        | lasso |      | GL $\gamma = 1$ |      | GL $\gamma = 10$ |      | marginal AL |      | sparsenet MCP |      |                                                                            |
|--------|-------|------|-----------------|------|------------------|------|-------------|------|---------------|------|----------------------------------------------------------------------------|
| CV.lse | 0.45  | 0.73 | 0.35            | 0.62 | 0.22             | 0.38 | 0.39        | 0.62 | 0.46          | 0.74 | $\text{sd}(\mu)/\sigma = 2$<br>$\rho = 0$<br>$\bar{s}_{Oracle} = 293.2$    |
| CV.min | 0.53  | 0.82 | 0.46            | 0.75 | 0.33             | 0.54 | 0.46        | 0.70 | 0.55          | 0.84 |                                                                            |
| AICc   | 0.39  | 0.64 | 0.36            | 0.63 | 0.40             | 0.64 | 0.39        | 0.62 |               |      |                                                                            |
| AIC    | 0.67  | 0.93 | 0.67            | 0.91 | 0.67             | 0.88 | 0.52        | 0.77 |               |      |                                                                            |
| BIC    | 0.00  | 0.00 | 0.00            | 0.00 | 0.28             | 0.43 | 0.02        | 0.04 |               |      |                                                                            |
| CV.lse | 0.51  | 0.58 | 0.44            | 0.48 | 0.04             | 0.05 | 0.51        | 0.40 | 0.49          | 0.57 | $\text{sd}(\mu)/\sigma = 2$<br>$\rho = 0.5$<br>$\bar{s}_{Oracle} = 293.1$  |
| CV.min | 0.57  | 0.79 | 0.53            | 0.71 | 0.16             | 0.15 | 0.54        | 0.53 | 0.58          | 0.80 |                                                                            |
| AICc   | 0.47  | 0.36 | 0.47            | 0.52 | 0.46             | 0.63 | 0.51        | 0.43 |               |      |                                                                            |
| AIC    | 0.67  | 0.94 | 0.66            | 0.93 | 0.66             | 0.91 | 0.59        | 0.70 |               |      |                                                                            |
| BIC    | 0.00  | 0.00 | 0.00            | 0.00 | 0.01             | 0.02 | 0.04        | 0.00 |               |      |                                                                            |
| CV.lse | 0.19  | 0.20 | 0.17            | 0.18 | 0.00             | 0.00 | 0.30        | 0.04 | 0.10          | 0.09 | $\text{sd}(\mu)/\sigma = 2$<br>$\rho = 0.9$<br>$\bar{s}_{Oracle} = 292.2$  |
| CV.min | 0.53  | 0.50 | 0.47            | 0.44 | 0.08             | 0.02 | 0.57        | 0.16 | 0.34          | 0.31 |                                                                            |
| AICc   | 0.47  | 0.03 | 0.16            | 0.08 | 0.51             | 0.63 | 0.56        | 0.16 |               |      |                                                                            |
| AIC    | 0.62  | 0.86 | 0.61            | 0.85 | 0.59             | 0.83 | 0.57        | 0.30 |               |      |                                                                            |
| BIC    | 0.05  | 0.00 | 0.01            | 0.00 | 0.00             | 0.00 | 0.06        | 0.01 |               |      |                                                                            |
| CV.lse | 0.35  | 0.28 | 0.12            | 0.07 | 0.00             | 0.00 | 0.48        | 0.45 | 0.36          | 0.29 | $\text{sd}(\mu)/\sigma = 1$<br>$\rho = 0$<br>$\bar{s}_{Oracle} = 215.4$    |
| CV.min | 0.55  | 0.55 | 0.34            | 0.27 | 0.04             | 0.02 | 0.57        | 0.57 | 0.55          | 0.55 |                                                                            |
| AICc   | 0.46  | 0.41 | 0.47            | 0.42 | 0.37             | 0.32 | 0.51        | 0.48 |               |      |                                                                            |
| AIC    | 0.77  | 0.91 | 0.77            | 0.88 | 0.78             | 0.88 | 0.69        | 0.75 |               |      |                                                                            |
| BIC    | 0.00  | 0.00 | 0.00            | 0.00 | 0.06             | 0.06 | 0.02        | 0.01 |               |      |                                                                            |
| CV.lse | 0.02  | 0.00 | 0.01            | 0.00 | 0.00             | 0.00 | 0.58        | 0.19 | 0.14          | 0.00 | $\text{sd}(\mu)/\sigma = 1$<br>$\rho = 0.5$<br>$\bar{s}_{Oracle} = 215.2$  |
| CV.min | 0.39  | 0.08 | 0.21            | 0.03 | 0.06             | 0.00 | 0.65        | 0.36 | 0.40          | 0.09 |                                                                            |
| AICc   | 0.48  | 0.10 | 0.12            | 0.04 | 0.21             | 0.16 | 0.63        | 0.27 |               |      |                                                                            |
| AIC    | 0.77  | 0.92 | 0.77            | 0.90 | 0.77             | 0.89 | 0.72        | 0.70 |               |      |                                                                            |
| BIC    | 0.01  | 0.00 | 0.00            | 0.00 | 0.00             | 0.00 | 0.05        | 0.00 |               |      |                                                                            |
| CV.lse | 0.00  | 0.00 | 0.00            | 0.00 | 0.00             | 0.00 | 0.10        | 0.01 | 0.01          | 0.00 | $\text{sd}(\mu)/\sigma = 1$<br>$\rho = 0.9$<br>$\bar{s}_{Oracle} = 211.7$  |
| CV.min | 0.44  | 0.02 | 0.36            | 0.01 | 0.10             | 0.01 | 0.66        | 0.07 | 0.24          | 0.01 |                                                                            |
| AICc   | 0.53  | 0.03 | 0.10            | 0.01 | 0.00             | 0.00 | 0.67        | 0.09 |               |      |                                                                            |
| AIC    | 0.75  | 0.85 | 0.75            | 0.84 | 0.75             | 0.80 | 0.69        | 0.33 |               |      |                                                                            |
| BIC    | 0.04  | 0.00 | 0.01            | 0.00 | 0.00             | 0.00 | 0.09        | 0.01 |               |      |                                                                            |
| CV.lse | 0.02  | 0.00 | 0.00            | 0.00 | 0.00             | 0.00 | 0.72        | 0.25 | 0.16          | 0.00 | $\text{sd}(\mu)/\sigma = 0.5$<br>$\rho = 0$<br>$\bar{s}_{Oracle} = 91.3$   |
| CV.min | 0.50  | 0.12 | 0.14            | 0.01 | 0.07             | 0.00 | 0.81        | 0.43 | 0.52          | 0.12 |                                                                            |
| AICc   | 0.60  | 0.15 | 0.09            | 0.03 | 0.00             | 0.00 | 0.77        | 0.35 |               |      |                                                                            |
| AIC    | 0.91  | 0.90 | 0.91            | 0.89 | 0.91             | 0.91 | 0.88        | 0.72 |               |      |                                                                            |
| BIC    | 0.01  | 0.00 | 0.00            | 0.00 | 0.65             | 0.64 | 0.07        | 0.00 |               |      |                                                                            |
| CV.lse | 0.00  | 0.00 | 0.00            | 0.00 | 0.00             | 0.00 | 0.64        | 0.06 | 0.28          | 0.00 | $\text{sd}(\mu)/\sigma = 0.5$<br>$\rho = 0.5$<br>$\bar{s}_{Oracle} = 90.9$ |
| CV.min | 0.38  | 0.02 | 0.20            | 0.00 | 0.08             | 0.00 | 0.84        | 0.22 | 0.50          | 0.02 |                                                                            |
| AICc   | 0.58  | 0.04 | 0.03            | 0.00 | 0.00             | 0.00 | 0.83        | 0.18 |               |      |                                                                            |
| AIC    | 0.91  | 0.91 | 0.91            | 0.89 | 0.91             | 0.90 | 0.89        | 0.66 |               |      |                                                                            |
| BIC    | 0.02  | 0.00 | 0.00            | 0.00 | 0.02             | 0.02 | 0.11        | 0.00 |               |      |                                                                            |
| CV.lse | 0.00  | 0.00 | 0.00            | 0.00 | 0.00             | 0.00 | 0.07        | 0.00 | 0.19          | 0.00 | $\text{sd}(\mu)/\sigma = 0.5$<br>$\rho = 0.9$<br>$\bar{s}_{Oracle} = 87.0$ |
| CV.min | 0.42  | 0.02 | 0.31            | 0.01 | 0.13             | 0.01 | 0.82        | 0.05 | 0.44          | 0.01 |                                                                            |
| AICc   | 0.59  | 0.03 | 0.07            | 0.00 | 0.00             | 0.00 | 0.83        | 0.06 |               |      |                                                                            |
| AIC    | 0.91  | 0.85 | 0.91            | 0.82 | 0.91             | 0.82 | 0.85        | 0.15 |               |      |                                                                            |
| BIC    | 0.02  | 0.00 | 0.01            | 0.00 | 0.00             | 0.00 | 0.10        | 0.01 |               |      |                                                                            |

Table 108: **FDR | Sensitivity for n=1000, binary design, sparse covariates, and decay 10.**

|        | lasso |      | GL $\gamma = 1$ |      | GL $\gamma = 10$ |      | marginal AL |      | sparsenet MCP |      |                                                                             |
|--------|-------|------|-----------------|------|------------------|------|-------------|------|---------------|------|-----------------------------------------------------------------------------|
| CV.lse | 0.33  | 0.26 | 0.19            | 0.24 | 0.01             | 0.20 | 0.22        | 0.22 | 0.01          | 0.19 | $\text{sd}(\mu)/\sigma = 2$<br>$\rho = 0$<br>$\bar{s}_{Oracle} = 100.0$     |
| CV.min | 0.67  | 0.33 | 0.59            | 0.31 | 0.20             | 0.24 | 0.51        | 0.26 | 0.19          | 0.24 |                                                                             |
| AICc   | 0.65  | 0.33 | 0.58            | 0.31 | 0.34             | 0.27 | 0.48        | 0.26 |               |      |                                                                             |
| AIC    | 0.88  | 0.72 | 0.88            | 0.72 | 0.88             | 0.69 | 0.49        | 0.26 |               |      |                                                                             |
| BIC    | 0.20  | 0.24 | 0.13            | 0.23 | 0.01             | 0.20 | 0.16        | 0.21 |               |      |                                                                             |
| CV.lse | 0.38  | 0.26 | 0.23            | 0.24 | 0.02             | 0.20 | 0.26        | 0.22 | 0.01          | 0.19 | $\text{sd}(\mu)/\sigma = 2$<br>$\rho = 0.5$<br>$\bar{s}_{Oracle} = 100.0$   |
| CV.min | 0.69  | 0.34 | 0.62            | 0.31 | 0.23             | 0.24 | 0.53        | 0.26 | 0.19          | 0.24 |                                                                             |
| AICc   | 0.67  | 0.33 | 0.60            | 0.31 | 0.37             | 0.27 | 0.51        | 0.25 |               |      |                                                                             |
| AIC    | 0.88  | 0.72 | 0.88            | 0.72 | 0.88             | 0.69 | 0.51        | 0.25 |               |      |                                                                             |
| BIC    | 0.23  | 0.23 | 0.14            | 0.23 | 0.01             | 0.20 | 0.19        | 0.20 |               |      |                                                                             |
| CV.lse | 0.41  | 0.26 | 0.26            | 0.24 | 0.03             | 0.20 | 0.28        | 0.21 | 0.01          | 0.19 | $\text{sd}(\mu)/\sigma = 2$<br>$\rho = 0.9$<br>$\bar{s}_{Oracle} = 100.0$   |
| CV.min | 0.70  | 0.34 | 0.63            | 0.31 | 0.26             | 0.24 | 0.53        | 0.25 | 0.21          | 0.24 |                                                                             |
| AICc   | 0.68  | 0.33 | 0.61            | 0.30 | 0.38             | 0.27 | 0.51        | 0.25 |               |      |                                                                             |
| AIC    | 0.88  | 0.71 | 0.88            | 0.71 | 0.88             | 0.69 | 0.52        | 0.25 |               |      |                                                                             |
| BIC    | 0.25  | 0.23 | 0.16            | 0.22 | 0.02             | 0.20 | 0.21        | 0.20 |               |      |                                                                             |
| CV.lse | 0.25  | 0.17 | 0.12            | 0.15 | 0.01             | 0.12 | 0.42        | 0.19 | 0.01          | 0.12 | $\text{sd}(\mu)/\sigma = 1$<br>$\rho = 0$<br>$\bar{s}_{Oracle} = 100.0$     |
| CV.min | 0.66  | 0.25 | 0.56            | 0.22 | 0.14             | 0.16 | 0.74        | 0.28 | 0.24          | 0.17 |                                                                             |
| AICc   | 0.66  | 0.25 | 0.59            | 0.23 | 0.32             | 0.20 | 0.71        | 0.26 |               |      |                                                                             |
| AIC    | 0.89  | 0.79 | 0.89            | 0.79 | 0.89             | 0.76 | 0.79        | 0.32 |               |      |                                                                             |
| BIC    | 0.18  | 0.16 | 0.09            | 0.15 | 0.00             | 0.12 | 0.15        | 0.15 |               |      |                                                                             |
| CV.lse | 0.29  | 0.17 | 0.15            | 0.15 | 0.01             | 0.12 | 0.46        | 0.19 | 0.01          | 0.12 | $\text{sd}(\mu)/\sigma = 1$<br>$\rho = 0.5$<br>$\bar{s}_{Oracle} = 100.0$   |
| CV.min | 0.68  | 0.25 | 0.59            | 0.22 | 0.14             | 0.16 | 0.76        | 0.28 | 0.22          | 0.17 |                                                                             |
| AICc   | 0.68  | 0.25 | 0.60            | 0.23 | 0.34             | 0.20 | 0.72        | 0.26 |               |      |                                                                             |
| AIC    | 0.89  | 0.79 | 0.89            | 0.79 | 0.89             | 0.76 | 0.79        | 0.32 |               |      |                                                                             |
| BIC    | 0.20  | 0.15 | 0.11            | 0.15 | 0.00             | 0.12 | 0.17        | 0.15 |               |      |                                                                             |
| CV.lse | 0.33  | 0.17 | 0.17            | 0.15 | 0.02             | 0.12 | 0.47        | 0.19 | 0.01          | 0.12 | $\text{sd}(\mu)/\sigma = 1$<br>$\rho = 0.9$<br>$\bar{s}_{Oracle} = 100.0$   |
| CV.min | 0.69  | 0.25 | 0.61            | 0.22 | 0.17             | 0.16 | 0.75        | 0.28 | 0.25          | 0.17 |                                                                             |
| AICc   | 0.69  | 0.25 | 0.62            | 0.23 | 0.36             | 0.20 | 0.72        | 0.26 |               |      |                                                                             |
| AIC    | 0.89  | 0.79 | 0.89            | 0.78 | 0.89             | 0.76 | 0.79        | 0.31 |               |      |                                                                             |
| BIC    | 0.21  | 0.15 | 0.12            | 0.14 | 0.01             | 0.11 | 0.19        | 0.14 |               |      |                                                                             |
| CV.lse | 0.11  | 0.07 | 0.05            | 0.06 | 0.01             | 0.05 | 0.56        | 0.14 | 0.01          | 0.05 | $\text{sd}(\mu)/\sigma = 0.5$<br>$\rho = 0$<br>$\bar{s}_{Oracle} = 100.0$   |
| CV.min | 0.64  | 0.15 | 0.50            | 0.13 | 0.13             | 0.08 | 0.81        | 0.26 | 0.35          | 0.11 |                                                                             |
| AICc   | 0.67  | 0.17 | 0.55            | 0.14 | 0.20             | 0.11 | 0.78        | 0.22 |               |      |                                                                             |
| AIC    | 0.90  | 0.85 | 0.90            | 0.84 | 0.90             | 0.83 | 0.87        | 0.42 |               |      |                                                                             |
| BIC    | 0.12  | 0.08 | 0.05            | 0.07 | 0.00             | 0.03 | 0.16        | 0.08 |               |      |                                                                             |
| CV.lse | 0.13  | 0.07 | 0.07            | 0.06 | 0.01             | 0.05 | 0.61        | 0.14 | 0.01          | 0.05 | $\text{sd}(\mu)/\sigma = 0.5$<br>$\rho = 0.5$<br>$\bar{s}_{Oracle} = 100.0$ |
| CV.min | 0.67  | 0.15 | 0.54            | 0.13 | 0.14             | 0.08 | 0.82        | 0.25 | 0.33          | 0.10 |                                                                             |
| AICc   | 0.69  | 0.17 | 0.59            | 0.14 | 0.23             | 0.11 | 0.78        | 0.22 |               |      |                                                                             |
| AIC    | 0.90  | 0.85 | 0.90            | 0.84 | 0.90             | 0.83 | 0.87        | 0.42 |               |      |                                                                             |
| BIC    | 0.12  | 0.07 | 0.06            | 0.06 | 0.00             | 0.03 | 0.18        | 0.08 |               |      |                                                                             |
| CV.lse | 0.15  | 0.07 | 0.08            | 0.06 | 0.02             | 0.04 | 0.60        | 0.14 | 0.02          | 0.05 | $\text{sd}(\mu)/\sigma = 0.5$<br>$\rho = 0.9$<br>$\bar{s}_{Oracle} = 100.0$ |
| CV.min | 0.68  | 0.15 | 0.56            | 0.13 | 0.15             | 0.08 | 0.81        | 0.25 | 0.34          | 0.10 |                                                                             |
| AICc   | 0.70  | 0.17 | 0.60            | 0.14 | 0.26             | 0.11 | 0.79        | 0.21 |               |      |                                                                             |
| AIC    | 0.90  | 0.85 | 0.90            | 0.84 | 0.90             | 0.83 | 0.86        | 0.41 |               |      |                                                                             |
| BIC    | 0.13  | 0.07 | 0.06            | 0.06 | 0.00             | 0.03 | 0.19        | 0.08 |               |      |                                                                             |

Table 109: **FDR | Sensitivity for n=1000, binary design, sparse covariates, and decay 50.**

|        | lasso |      | GL $\gamma = 1$ |      | GL $\gamma = 10$ |      | marginal AL |      | sparsenet MCP |      |                                                                             |
|--------|-------|------|-----------------|------|------------------|------|-------------|------|---------------|------|-----------------------------------------------------------------------------|
| CV.lse | 0.50  | 0.86 | 0.36            | 0.82 | 0.07             | 0.69 | 0.44        | 0.77 | 0.11          | 0.72 | $\text{sd}(\mu)/\sigma = 2$<br>$\rho = 0$<br>$\bar{s}_{Oracle} = 100.0$     |
| CV.min | 0.66  | 0.92 | 0.57            | 0.89 | 0.19             | 0.78 | 0.59        | 0.83 | 0.36          | 0.84 |                                                                             |
| AICc   | 0.58  | 0.89 | 0.50            | 0.88 | 0.40             | 0.85 | 0.55        | 0.81 |               |      |                                                                             |
| AIC    | 0.87  | 0.97 | 0.87            | 0.96 | 0.87             | 0.94 | 0.64        | 0.85 |               |      |                                                                             |
| BIC    | 0.24  | 0.72 | 0.14            | 0.70 | 0.02             | 0.60 | 0.23        | 0.66 |               |      |                                                                             |
| CV.lse | 0.54  | 0.86 | 0.40            | 0.82 | 0.07             | 0.68 | 0.47        | 0.76 | 0.10          | 0.71 | $\text{sd}(\mu)/\sigma = 2$<br>$\rho = 0.5$<br>$\bar{s}_{Oracle} = 100.0$   |
| CV.min | 0.68  | 0.92 | 0.59            | 0.90 | 0.20             | 0.78 | 0.61        | 0.82 | 0.34          | 0.83 |                                                                             |
| AICc   | 0.59  | 0.88 | 0.53            | 0.87 | 0.42             | 0.86 | 0.57        | 0.81 |               |      |                                                                             |
| AIC    | 0.87  | 0.97 | 0.87            | 0.97 | 0.87             | 0.95 | 0.67        | 0.85 |               |      |                                                                             |
| BIC    | 0.26  | 0.70 | 0.16            | 0.69 | 0.03             | 0.60 | 0.26        | 0.64 |               |      |                                                                             |
| CV.lse | 0.55  | 0.86 | 0.42            | 0.82 | 0.09             | 0.69 | 0.48        | 0.75 | 0.13          | 0.72 | $\text{sd}(\mu)/\sigma = 2$<br>$\rho = 0.9$<br>$\bar{s}_{Oracle} = 100.0$   |
| CV.min | 0.69  | 0.92 | 0.60            | 0.90 | 0.23             | 0.78 | 0.61        | 0.82 | 0.36          | 0.83 |                                                                             |
| AICc   | 0.60  | 0.88 | 0.53            | 0.87 | 0.42             | 0.85 | 0.57        | 0.80 |               |      |                                                                             |
| AIC    | 0.87  | 0.97 | 0.87            | 0.97 | 0.87             | 0.95 | 0.67        | 0.85 |               |      |                                                                             |
| BIC    | 0.28  | 0.70 | 0.18            | 0.68 | 0.04             | 0.60 | 0.28        | 0.64 |               |      |                                                                             |
| CV.lse | 0.41  | 0.53 | 0.26            | 0.45 | 0.07             | 0.31 | 0.50        | 0.56 | 0.24          | 0.44 | $\text{sd}(\mu)/\sigma = 1$<br>$\rho = 0$<br>$\bar{s}_{Oracle} = 100.0$     |
| CV.min | 0.64  | 0.67 | 0.52            | 0.60 | 0.19             | 0.42 | 0.66        | 0.67 | 0.54          | 0.62 |                                                                             |
| AICc   | 0.58  | 0.64 | 0.53            | 0.61 | 0.60             | 0.63 | 0.61        | 0.63 |               |      |                                                                             |
| AIC    | 0.89  | 0.92 | 0.89            | 0.91 | 0.89             | 0.89 | 0.78        | 0.77 |               |      |                                                                             |
| BIC    | 0.08  | 0.24 | 0.06            | 0.27 | 0.01             | 0.12 | 0.17        | 0.35 |               |      |                                                                             |
| CV.lse | 0.45  | 0.52 | 0.30            | 0.45 | 0.08             | 0.31 | 0.54        | 0.56 | 0.21          | 0.41 | $\text{sd}(\mu)/\sigma = 1$<br>$\rho = 0.5$<br>$\bar{s}_{Oracle} = 100.0$   |
| CV.min | 0.66  | 0.67 | 0.55            | 0.60 | 0.20             | 0.42 | 0.68        | 0.66 | 0.52          | 0.59 |                                                                             |
| AICc   | 0.60  | 0.63 | 0.55            | 0.60 | 0.60             | 0.63 | 0.63        | 0.63 |               |      |                                                                             |
| AIC    | 0.89  | 0.92 | 0.89            | 0.92 | 0.89             | 0.89 | 0.79        | 0.77 |               |      |                                                                             |
| BIC    | 0.06  | 0.18 | 0.07            | 0.24 | 0.01             | 0.12 | 0.18        | 0.32 |               |      |                                                                             |
| CV.lse | 0.47  | 0.52 | 0.33            | 0.45 | 0.10             | 0.30 | 0.54        | 0.55 | 0.24          | 0.42 | $\text{sd}(\mu)/\sigma = 1$<br>$\rho = 0.9$<br>$\bar{s}_{Oracle} = 100.0$   |
| CV.min | 0.66  | 0.67 | 0.56            | 0.60 | 0.22             | 0.41 | 0.68        | 0.65 | 0.53          | 0.59 |                                                                             |
| AICc   | 0.61  | 0.62 | 0.56            | 0.60 | 0.59             | 0.62 | 0.63        | 0.62 |               |      |                                                                             |
| AIC    | 0.89  | 0.93 | 0.89            | 0.91 | 0.89             | 0.89 | 0.79        | 0.76 |               |      |                                                                             |
| BIC    | 0.07  | 0.16 | 0.08            | 0.23 | 0.01             | 0.11 | 0.20        | 0.31 |               |      |                                                                             |
| CV.lse | 0.08  | 0.03 | 0.03            | 0.01 | 0.00             | 0.00 | 0.59        | 0.28 | 0.07          | 0.03 | $\text{sd}(\mu)/\sigma = 0.5$<br>$\rho = 0$<br>$\bar{s}_{Oracle} = 100.0$   |
| CV.min | 0.56  | 0.26 | 0.31            | 0.13 | 0.07             | 0.03 | 0.75        | 0.44 | 0.55          | 0.25 |                                                                             |
| AICc   | 0.59  | 0.27 | 0.58            | 0.28 | 0.21             | 0.12 | 0.71        | 0.38 |               |      |                                                                             |
| AIC    | 0.90  | 0.90 | 0.90            | 0.89 | 0.90             | 0.89 | 0.85        | 0.67 |               |      |                                                                             |
| BIC    | 0.01  | 0.00 | 0.01            | 0.01 | 0.00             | 0.00 | 0.05        | 0.03 |               |      |                                                                             |
| CV.lse | 0.07  | 0.02 | 0.03            | 0.01 | 0.00             | 0.00 | 0.62        | 0.27 | 0.08          | 0.02 | $\text{sd}(\mu)/\sigma = 0.5$<br>$\rho = 0.5$<br>$\bar{s}_{Oracle} = 100.0$ |
| CV.min | 0.56  | 0.23 | 0.33            | 0.12 | 0.07             | 0.02 | 0.76        | 0.43 | 0.54          | 0.22 |                                                                             |
| AICc   | 0.59  | 0.25 | 0.58            | 0.26 | 0.27             | 0.15 | 0.72        | 0.37 |               |      |                                                                             |
| AIC    | 0.90  | 0.90 | 0.90            | 0.89 | 0.90             | 0.89 | 0.86        | 0.68 |               |      |                                                                             |
| BIC    | 0.00  | 0.00 | 0.00            | 0.00 | 0.00             | 0.00 | 0.05        | 0.02 |               |      |                                                                             |
| CV.lse | 0.07  | 0.02 | 0.03            | 0.01 | 0.00             | 0.00 | 0.62        | 0.26 | 0.08          | 0.01 | $\text{sd}(\mu)/\sigma = 0.5$<br>$\rho = 0.9$<br>$\bar{s}_{Oracle} = 100.0$ |
| CV.min | 0.58  | 0.23 | 0.35            | 0.12 | 0.09             | 0.02 | 0.76        | 0.42 | 0.55          | 0.22 |                                                                             |
| AICc   | 0.61  | 0.25 | 0.60            | 0.26 | 0.26             | 0.14 | 0.72        | 0.36 |               |      |                                                                             |
| AIC    | 0.90  | 0.90 | 0.90            | 0.89 | 0.90             | 0.89 | 0.85        | 0.67 |               |      |                                                                             |
| BIC    | 0.01  | 0.00 | 0.01            | 0.00 | 0.00             | 0.00 | 0.06        | 0.02 |               |      |                                                                             |

Table 110: **FDR | Sensitivity for n=1000, binary design, sparse covariates, and decay 100.**

|        | lasso |      | GL $\gamma = 1$ |      | GL $\gamma = 10$ |      | marginal AL |      | sparsenet MCP |      |                                                                             |
|--------|-------|------|-----------------|------|------------------|------|-------------|------|---------------|------|-----------------------------------------------------------------------------|
| CV.lse | 0.54  | 0.98 | 0.37            | 0.98 | 0.08             | 0.93 | 0.46        | 0.94 | 0.07          | 0.93 | $\text{sd}(\mu)/\sigma = 2$<br>$\rho = 0$<br>$\bar{s}_{Oracle} = 100.0$     |
| CV.min | 0.68  | 0.99 | 0.56            | 0.99 | 0.17             | 0.97 | 0.58        | 0.96 | 0.22          | 0.97 |                                                                             |
| AICc   | 0.58  | 0.99 | 0.48            | 0.99 | 0.26             | 0.97 | 0.54        | 0.95 |               |      |                                                                             |
| AIC    | 0.87  | 1.00 | 0.87            | 0.99 | 0.87             | 0.98 | 0.67        | 0.97 |               |      |                                                                             |
| BIC    | 0.30  | 0.93 | 0.19            | 0.93 | 0.03             | 0.87 | 0.29        | 0.87 |               |      |                                                                             |
| CV.lse | 0.57  | 0.98 | 0.41            | 0.98 | 0.09             | 0.94 | 0.49        | 0.93 | 0.08          | 0.94 | $\text{sd}(\mu)/\sigma = 2$<br>$\rho = 0.5$<br>$\bar{s}_{Oracle} = 100.0$   |
| CV.min | 0.69  | 0.99 | 0.59            | 0.99 | 0.19             | 0.97 | 0.61        | 0.96 | 0.21          | 0.97 |                                                                             |
| AICc   | 0.60  | 0.99 | 0.51            | 0.99 | 0.28             | 0.98 | 0.56        | 0.95 |               |      |                                                                             |
| AIC    | 0.87  | 1.00 | 0.87            | 1.00 | 0.87             | 0.99 | 0.69        | 0.97 |               |      |                                                                             |
| BIC    | 0.33  | 0.92 | 0.22            | 0.93 | 0.04             | 0.88 | 0.32        | 0.86 |               |      |                                                                             |
| CV.lse | 0.58  | 0.99 | 0.43            | 0.98 | 0.11             | 0.94 | 0.50        | 0.93 | 0.11          | 0.95 | $\text{sd}(\mu)/\sigma = 2$<br>$\rho = 0.9$<br>$\bar{s}_{Oracle} = 100.0$   |
| CV.min | 0.70  | 0.99 | 0.59            | 0.99 | 0.21             | 0.97 | 0.61        | 0.95 | 0.23          | 0.97 |                                                                             |
| AICc   | 0.60  | 0.99 | 0.52            | 0.99 | 0.29             | 0.97 | 0.57        | 0.94 |               |      |                                                                             |
| AIC    | 0.87  | 1.00 | 0.87            | 1.00 | 0.87             | 0.99 | 0.69        | 0.97 |               |      |                                                                             |
| BIC    | 0.34  | 0.92 | 0.24            | 0.93 | 0.05             | 0.88 | 0.34        | 0.85 |               |      |                                                                             |
| CV.lse | 0.43  | 0.66 | 0.28            | 0.55 | 0.09             | 0.31 | 0.51        | 0.71 | 0.38          | 0.65 | $\text{sd}(\mu)/\sigma = 1$<br>$\rho = 0$<br>$\bar{s}_{Oracle} = 100.0$     |
| CV.min | 0.64  | 0.82 | 0.51            | 0.74 | 0.22             | 0.49 | 0.64        | 0.81 | 0.62          | 0.81 |                                                                             |
| AICc   | 0.57  | 0.77 | 0.52            | 0.75 | 0.59             | 0.75 | 0.59        | 0.77 |               |      |                                                                             |
| AIC    | 0.89  | 0.95 | 0.89            | 0.93 | 0.89             | 0.91 | 0.78        | 0.89 |               |      |                                                                             |
| BIC    | 0.00  | 0.02 | 0.02            | 0.09 | 0.00             | 0.01 | 0.10        | 0.27 |               |      |                                                                             |
| CV.lse | 0.46  | 0.65 | 0.31            | 0.55 | 0.10             | 0.30 | 0.54        | 0.70 | 0.40          | 0.63 | $\text{sd}(\mu)/\sigma = 1$<br>$\rho = 0.5$<br>$\bar{s}_{Oracle} = 100.0$   |
| CV.min | 0.65  | 0.82 | 0.53            | 0.74 | 0.23             | 0.49 | 0.66        | 0.80 | 0.63          | 0.81 |                                                                             |
| AICc   | 0.58  | 0.76 | 0.54            | 0.75 | 0.59             | 0.76 | 0.60        | 0.76 |               |      |                                                                             |
| AIC    | 0.89  | 0.95 | 0.89            | 0.94 | 0.89             | 0.91 | 0.79        | 0.89 |               |      |                                                                             |
| BIC    | 0.00  | 0.01 | 0.01            | 0.05 | 0.00             | 0.01 | 0.09        | 0.20 |               |      |                                                                             |
| CV.lse | 0.48  | 0.65 | 0.34            | 0.54 | 0.12             | 0.29 | 0.55        | 0.69 | 0.41          | 0.62 | $\text{sd}(\mu)/\sigma = 1$<br>$\rho = 0.9$<br>$\bar{s}_{Oracle} = 100.0$   |
| CV.min | 0.66  | 0.82 | 0.55            | 0.74 | 0.25             | 0.47 | 0.66        | 0.79 | 0.64          | 0.80 |                                                                             |
| AICc   | 0.59  | 0.76 | 0.55            | 0.75 | 0.60             | 0.75 | 0.61        | 0.75 |               |      |                                                                             |
| AIC    | 0.89  | 0.95 | 0.89            | 0.94 | 0.89             | 0.91 | 0.79        | 0.88 |               |      |                                                                             |
| BIC    | 0.00  | 0.01 | 0.01            | 0.04 | 0.00             | 0.01 | 0.09        | 0.17 |               |      |                                                                             |
| CV.lse | 0.04  | 0.02 | 0.01            | 0.00 | 0.00             | 0.00 | 0.59        | 0.30 | 0.08          | 0.01 | $\text{sd}(\mu)/\sigma = 0.5$<br>$\rho = 0$<br>$\bar{s}_{Oracle} = 100.0$   |
| CV.min | 0.51  | 0.24 | 0.20            | 0.06 | 0.05             | 0.01 | 0.74        | 0.49 | 0.50          | 0.23 |                                                                             |
| AICc   | 0.55  | 0.26 | 0.59            | 0.30 | 0.14             | 0.09 | 0.69        | 0.41 |               |      |                                                                             |
| AIC    | 0.90  | 0.91 | 0.90            | 0.89 | 0.90             | 0.90 | 0.85        | 0.73 |               |      |                                                                             |
| BIC    | 0.00  | 0.00 | 0.00            | 0.00 | 0.00             | 0.00 | 0.04        | 0.01 |               |      |                                                                             |
| CV.lse | 0.04  | 0.01 | 0.00            | 0.00 | 0.00             | 0.00 | 0.62        | 0.29 | 0.08          | 0.01 | $\text{sd}(\mu)/\sigma = 0.5$<br>$\rho = 0.5$<br>$\bar{s}_{Oracle} = 100.0$ |
| CV.min | 0.48  | 0.20 | 0.19            | 0.05 | 0.04             | 0.01 | 0.75        | 0.47 | 0.48          | 0.19 |                                                                             |
| AICc   | 0.55  | 0.23 | 0.58            | 0.28 | 0.17             | 0.10 | 0.71        | 0.40 |               |      |                                                                             |
| AIC    | 0.90  | 0.91 | 0.90            | 0.89 | 0.90             | 0.90 | 0.85        | 0.73 |               |      |                                                                             |
| BIC    | 0.00  | 0.00 | 0.00            | 0.00 | 0.00             | 0.00 | 0.04        | 0.01 |               |      |                                                                             |
| CV.lse | 0.03  | 0.01 | 0.01            | 0.00 | 0.00             | 0.00 | 0.62        | 0.27 | 0.10          | 0.01 | $\text{sd}(\mu)/\sigma = 0.5$<br>$\rho = 0.9$<br>$\bar{s}_{Oracle} = 100.0$ |
| CV.min | 0.51  | 0.19 | 0.21            | 0.05 | 0.06             | 0.01 | 0.75        | 0.46 | 0.50          | 0.19 |                                                                             |
| AICc   | 0.57  | 0.23 | 0.59            | 0.28 | 0.16             | 0.09 | 0.71        | 0.39 |               |      |                                                                             |
| AIC    | 0.90  | 0.91 | 0.90            | 0.89 | 0.90             | 0.90 | 0.85        | 0.72 |               |      |                                                                             |
| BIC    | 0.01  | 0.00 | 0.00            | 0.00 | 0.00             | 0.00 | 0.06        | 0.01 |               |      |                                                                             |

Table 111: **FDR | Sensitivity for n=1000, binary design, sparse covariates, and decay 200.**

|        | lasso |      | GL $\gamma = 1$ |      | GL $\gamma = 10$ |      | marginal AL |      | sparsenet MCP |      |                                                                             |
|--------|-------|------|-----------------|------|------------------|------|-------------|------|---------------|------|-----------------------------------------------------------------------------|
| CV.lse | 0.55  | 1.00 | 0.35            | 1.00 | 0.06             | 0.99 | 0.46        | 0.98 | 0.04          | 0.98 | $\text{sd}(\mu)/\sigma = 2$<br>$\rho = 0$<br>$\bar{s}_{Oracle} = 100.0$     |
| CV.min | 0.68  | 1.00 | 0.54            | 1.00 | 0.13             | 1.00 | 0.58        | 0.99 | 0.13          | 0.99 |                                                                             |
| AICc   | 0.58  | 1.00 | 0.46            | 1.00 | 0.11             | 0.99 | 0.53        | 0.98 |               |      |                                                                             |
| AIC    | 0.87  | 1.00 | 0.87            | 1.00 | 0.87             | 0.99 | 0.68        | 0.99 |               |      |                                                                             |
| BIC    | 0.34  | 0.99 | 0.20            | 0.99 | 0.03             | 0.96 | 0.33        | 0.95 |               |      |                                                                             |
| CV.lse | 0.58  | 1.00 | 0.39            | 1.00 | 0.06             | 0.99 | 0.49        | 0.97 | 0.04          | 0.99 | $\text{sd}(\mu)/\sigma = 2$<br>$\rho = 0.5$<br>$\bar{s}_{Oracle} = 100.0$   |
| CV.min | 0.70  | 1.00 | 0.56            | 1.00 | 0.13             | 1.00 | 0.60        | 0.98 | 0.13          | 1.00 |                                                                             |
| AICc   | 0.60  | 1.00 | 0.48            | 1.00 | 0.11             | 0.99 | 0.56        | 0.98 |               |      |                                                                             |
| AIC    | 0.87  | 1.00 | 0.87            | 1.00 | 0.87             | 0.99 | 0.70        | 0.99 |               |      |                                                                             |
| BIC    | 0.37  | 0.98 | 0.23            | 0.99 | 0.03             | 0.97 | 0.36        | 0.94 |               |      |                                                                             |
| CV.lse | 0.59  | 1.00 | 0.41            | 1.00 | 0.09             | 0.99 | 0.51        | 0.97 | 0.07          | 0.99 | $\text{sd}(\mu)/\sigma = 2$<br>$\rho = 0.9$<br>$\bar{s}_{Oracle} = 100.0$   |
| CV.min | 0.70  | 1.00 | 0.57            | 1.00 | 0.16             | 1.00 | 0.61        | 0.98 | 0.15          | 1.00 |                                                                             |
| AICc   | 0.61  | 1.00 | 0.49            | 1.00 | 0.12             | 0.99 | 0.57        | 0.98 |               |      |                                                                             |
| AIC    | 0.87  | 1.00 | 0.87            | 1.00 | 0.87             | 0.99 | 0.70        | 0.99 |               |      |                                                                             |
| BIC    | 0.39  | 0.98 | 0.25            | 0.99 | 0.04             | 0.97 | 0.38        | 0.94 |               |      |                                                                             |
| CV.lse | 0.43  | 0.72 | 0.27            | 0.57 | 0.09             | 0.25 | 0.51        | 0.77 | 0.41          | 0.72 | $\text{sd}(\mu)/\sigma = 1$<br>$\rho = 0$<br>$\bar{s}_{Oracle} = 100.0$     |
| CV.min | 0.63  | 0.87 | 0.49            | 0.79 | 0.21             | 0.48 | 0.64        | 0.86 | 0.63          | 0.87 |                                                                             |
| AICc   | 0.56  | 0.82 | 0.52            | 0.81 | 0.60             | 0.80 | 0.58        | 0.82 |               |      |                                                                             |
| AIC    | 0.89  | 0.96 | 0.89            | 0.94 | 0.89             | 0.91 | 0.78        | 0.93 |               |      |                                                                             |
| BIC    | 0.00  | 0.00 | 0.01            | 0.04 | 0.00             | 0.01 | 0.05        | 0.15 |               |      |                                                                             |
| CV.lse | 0.46  | 0.70 | 0.30            | 0.57 | 0.09             | 0.22 | 0.54        | 0.76 | 0.43          | 0.70 | $\text{sd}(\mu)/\sigma = 1$<br>$\rho = 0.5$<br>$\bar{s}_{Oracle} = 100.0$   |
| CV.min | 0.65  | 0.87 | 0.52            | 0.79 | 0.22             | 0.45 | 0.66        | 0.85 | 0.65          | 0.87 |                                                                             |
| AICc   | 0.58  | 0.81 | 0.54            | 0.81 | 0.59             | 0.81 | 0.60        | 0.81 |               |      |                                                                             |
| AIC    | 0.89  | 0.96 | 0.89            | 0.95 | 0.89             | 0.92 | 0.79        | 0.93 |               |      |                                                                             |
| BIC    | 0.00  | 0.00 | 0.00            | 0.02 | 0.00             | 0.00 | 0.04        | 0.09 |               |      |                                                                             |
| CV.lse | 0.48  | 0.70 | 0.33            | 0.56 | 0.09             | 0.20 | 0.55        | 0.74 | 0.45          | 0.69 | $\text{sd}(\mu)/\sigma = 1$<br>$\rho = 0.9$<br>$\bar{s}_{Oracle} = 100.0$   |
| CV.min | 0.66  | 0.87 | 0.53            | 0.79 | 0.23             | 0.43 | 0.66        | 0.84 | 0.65          | 0.87 |                                                                             |
| AICc   | 0.58  | 0.81 | 0.55            | 0.81 | 0.60             | 0.80 | 0.61        | 0.80 |               |      |                                                                             |
| AIC    | 0.89  | 0.96 | 0.89            | 0.94 | 0.89             | 0.92 | 0.79        | 0.92 |               |      |                                                                             |
| BIC    | 0.00  | 0.00 | 0.00            | 0.01 | 0.00             | 0.00 | 0.04        | 0.07 |               |      |                                                                             |
| CV.lse | 0.04  | 0.01 | 0.00            | 0.00 | 0.00             | 0.00 | 0.60        | 0.30 | 0.09          | 0.01 | $\text{sd}(\mu)/\sigma = 0.5$<br>$\rho = 0$<br>$\bar{s}_{Oracle} = 100.0$   |
| CV.min | 0.49  | 0.22 | 0.14            | 0.04 | 0.04             | 0.01 | 0.73        | 0.50 | 0.48          | 0.22 |                                                                             |
| AICc   | 0.54  | 0.25 | 0.60            | 0.32 | 0.09             | 0.06 | 0.69        | 0.42 |               |      |                                                                             |
| AIC    | 0.90  | 0.91 | 0.90            | 0.89 | 0.90             | 0.90 | 0.85        | 0.75 |               |      |                                                                             |
| BIC    | 0.00  | 0.00 | 0.00            | 0.00 | 0.00             | 0.00 | 0.04        | 0.01 |               |      |                                                                             |
| CV.lse | 0.03  | 0.01 | 0.00            | 0.00 | 0.00             | 0.00 | 0.62        | 0.29 | 0.10          | 0.01 | $\text{sd}(\mu)/\sigma = 0.5$<br>$\rho = 0.5$<br>$\bar{s}_{Oracle} = 100.0$ |
| CV.min | 0.45  | 0.17 | 0.15            | 0.03 | 0.04             | 0.01 | 0.74        | 0.48 | 0.45          | 0.17 |                                                                             |
| AICc   | 0.53  | 0.21 | 0.59            | 0.30 | 0.11             | 0.07 | 0.70        | 0.40 |               |      |                                                                             |
| AIC    | 0.90  | 0.91 | 0.90            | 0.89 | 0.90             | 0.91 | 0.85        | 0.75 |               |      |                                                                             |
| BIC    | 0.00  | 0.00 | 0.00            | 0.00 | 0.00             | 0.00 | 0.05        | 0.01 |               |      |                                                                             |
| CV.lse | 0.03  | 0.01 | 0.00            | 0.00 | 0.00             | 0.00 | 0.63        | 0.27 | 0.12          | 0.01 | $\text{sd}(\mu)/\sigma = 0.5$<br>$\rho = 0.9$<br>$\bar{s}_{Oracle} = 100.0$ |
| CV.min | 0.47  | 0.17 | 0.17            | 0.03 | 0.05             | 0.01 | 0.75        | 0.47 | 0.47          | 0.16 |                                                                             |
| AICc   | 0.55  | 0.21 | 0.60            | 0.29 | 0.10             | 0.06 | 0.71        | 0.39 |               |      |                                                                             |
| AIC    | 0.90  | 0.91 | 0.90            | 0.89 | 0.90             | 0.90 | 0.85        | 0.74 |               |      |                                                                             |
| BIC    | 0.01  | 0.00 | 0.00            | 0.00 | 0.00             | 0.00 | 0.06        | 0.01 |               |      |                                                                             |

Table 112: **FDR | Sensitivity for n=1000, continuous design, sparse covariates, and decay 10.**

|        | lasso |      | GL $\gamma = 1$ |      | GL $\gamma = 10$ |      | marginal AL |      | sparsenet MCP |      |                                                                             |
|--------|-------|------|-----------------|------|------------------|------|-------------|------|---------------|------|-----------------------------------------------------------------------------|
| CV.lse | 0.33  | 0.26 | 0.20            | 0.24 | 0.02             | 0.20 | 0.22        | 0.22 | 0.00          | 0.19 | $\text{sd}(\mu)/\sigma = 2$<br>$\rho = 0$<br>$\bar{s}_{Oracle} = 100.0$     |
| CV.min | 0.67  | 0.33 | 0.59            | 0.31 | 0.20             | 0.24 | 0.51        | 0.26 | 0.19          | 0.24 |                                                                             |
| AICc   | 0.65  | 0.33 | 0.56            | 0.30 | 0.09             | 0.22 | 0.48        | 0.26 |               |      |                                                                             |
| AIC    | 0.88  | 0.72 | 0.88            | 0.72 | 0.88             | 0.69 | 0.49        | 0.26 |               |      |                                                                             |
| BIC    | 0.21  | 0.23 | 0.11            | 0.22 | 0.00             | 0.18 | 0.17        | 0.21 |               |      |                                                                             |
| CV.lse | 0.68  | 0.27 | 0.57            | 0.24 | 0.16             | 0.18 | 0.47        | 0.18 | 0.04          | 0.18 | $\text{sd}(\mu)/\sigma = 2$<br>$\rho = 0.5$<br>$\bar{s}_{Oracle} = 100.0$   |
| CV.min | 0.79  | 0.36 | 0.75            | 0.32 | 0.49             | 0.24 | 0.56        | 0.20 | 0.23          | 0.21 |                                                                             |
| AICc   | 0.77  | 0.34 | 0.72            | 0.30 | 0.41             | 0.23 | 0.56        | 0.20 |               |      |                                                                             |
| AIC    | 0.88  | 0.66 | 0.88            | 0.66 | 0.87             | 0.65 | 0.56        | 0.20 |               |      |                                                                             |
| BIC    | 0.46  | 0.20 | 0.34            | 0.19 | 0.04             | 0.16 | 0.46        | 0.18 |               |      |                                                                             |
| CV.lse | 0.81  | 0.28 | 0.79            | 0.25 | 0.68             | 0.18 | 0.03        | 0.11 | 0.45          | 0.16 | $\text{sd}(\mu)/\sigma = 2$<br>$\rho = 0.9$<br>$\bar{s}_{Oracle} = 100.0$   |
| CV.min | 0.83  | 0.37 | 0.82            | 0.34 | 0.75             | 0.24 | 0.06        | 0.12 | 0.61          | 0.20 |                                                                             |
| AICc   | 0.82  | 0.33 | 0.81            | 0.30 | 0.72             | 0.22 | 0.06        | 0.12 |               |      |                                                                             |
| AIC    | 0.84  | 0.39 | 0.84            | 0.39 | 0.81             | 0.35 | 0.06        | 0.12 |               |      |                                                                             |
| BIC    | 0.74  | 0.17 | 0.72            | 0.15 | 0.45             | 0.10 | 0.05        | 0.12 |               |      |                                                                             |
| CV.lse | 0.25  | 0.17 | 0.12            | 0.15 | 0.01             | 0.12 | 0.43        | 0.19 | 0.01          | 0.12 | $\text{sd}(\mu)/\sigma = 1$<br>$\rho = 0$<br>$\bar{s}_{Oracle} = 100.0$     |
| CV.min | 0.66  | 0.25 | 0.56            | 0.22 | 0.14             | 0.16 | 0.75        | 0.28 | 0.23          | 0.17 |                                                                             |
| AICc   | 0.66  | 0.25 | 0.52            | 0.21 | 0.03             | 0.13 | 0.71        | 0.26 |               |      |                                                                             |
| AIC    | 0.89  | 0.79 | 0.89            | 0.79 | 0.89             | 0.76 | 0.79        | 0.32 |               |      |                                                                             |
| BIC    | 0.18  | 0.16 | 0.07            | 0.14 | 0.00             | 0.10 | 0.15        | 0.15 |               |      |                                                                             |
| CV.lse | 0.61  | 0.16 | 0.49            | 0.14 | 0.11             | 0.11 | 0.70        | 0.18 | 0.06          | 0.11 | $\text{sd}(\mu)/\sigma = 1$<br>$\rho = 0.5$<br>$\bar{s}_{Oracle} = 100.0$   |
| CV.min | 0.79  | 0.26 | 0.75            | 0.23 | 0.40             | 0.15 | 0.80        | 0.25 | 0.30          | 0.14 |                                                                             |
| AICc   | 0.78  | 0.25 | 0.73            | 0.21 | 0.28             | 0.14 | 0.79        | 0.24 |               |      |                                                                             |
| AIC    | 0.89  | 0.75 | 0.89            | 0.75 | 0.89             | 0.72 | 0.80        | 0.26 |               |      |                                                                             |
| BIC    | 0.38  | 0.12 | 0.27            | 0.11 | 0.02             | 0.08 | 0.47        | 0.12 |               |      |                                                                             |
| CV.lse | 0.63  | 0.11 | 0.74            | 0.12 | 0.71             | 0.10 | 0.30        | 0.10 | 0.57          | 0.09 | $\text{sd}(\mu)/\sigma = 1$<br>$\rho = 0.9$<br>$\bar{s}_{Oracle} = 100.0$   |
| CV.min | 0.83  | 0.24 | 0.83            | 0.22 | 0.77             | 0.14 | 0.49        | 0.13 | 0.70          | 0.13 |                                                                             |
| AICc   | 0.84  | 0.23 | 0.82            | 0.19 | 0.71             | 0.12 | 0.49        | 0.13 |               |      |                                                                             |
| AIC    | 0.87  | 0.48 | 0.87            | 0.49 | 0.87             | 0.47 | 0.49        | 0.13 |               |      |                                                                             |
| BIC    | 0.08  | 0.01 | 0.01            | 0.01 | 0.01             | 0.01 | 0.32        | 0.10 |               |      |                                                                             |
| CV.lse | 0.11  | 0.07 | 0.05            | 0.06 | 0.01             | 0.05 | 0.57        | 0.15 | 0.01          | 0.05 | $\text{sd}(\mu)/\sigma = 0.5$<br>$\rho = 0$<br>$\bar{s}_{Oracle} = 100.0$   |
| CV.min | 0.64  | 0.16 | 0.50            | 0.13 | 0.12             | 0.08 | 0.81        | 0.26 | 0.34          | 0.11 |                                                                             |
| AICc   | 0.67  | 0.17 | 0.40            | 0.12 | 0.00             | 0.04 | 0.78        | 0.22 |               |      |                                                                             |
| AIC    | 0.90  | 0.85 | 0.90            | 0.84 | 0.90             | 0.83 | 0.87        | 0.41 |               |      |                                                                             |
| BIC    | 0.12  | 0.08 | 0.03            | 0.06 | 0.00             | 0.02 | 0.15        | 0.08 |               |      |                                                                             |
| CV.lse | 0.14  | 0.02 | 0.17            | 0.03 | 0.06             | 0.03 | 0.73        | 0.11 | 0.09          | 0.04 | $\text{sd}(\mu)/\sigma = 0.5$<br>$\rho = 0.5$<br>$\bar{s}_{Oracle} = 100.0$ |
| CV.min | 0.74  | 0.12 | 0.71            | 0.11 | 0.33             | 0.06 | 0.84        | 0.22 | 0.41          | 0.07 |                                                                             |
| AICc   | 0.77  | 0.14 | 0.65            | 0.10 | 0.04             | 0.02 | 0.83        | 0.19 |               |      |                                                                             |
| AIC    | 0.90  | 0.83 | 0.90            | 0.82 | 0.90             | 0.80 | 0.87        | 0.33 |               |      |                                                                             |
| BIC    | 0.09  | 0.02 | 0.04            | 0.02 | 0.00             | 0.01 | 0.16        | 0.02 |               |      |                                                                             |
| CV.lse | 0.00  | 0.01 | 0.00            | 0.01 | 0.00             | 0.01 | 0.41        | 0.05 | 0.01          | 0.01 | $\text{sd}(\mu)/\sigma = 0.5$<br>$\rho = 0.9$<br>$\bar{s}_{Oracle} = 100.0$ |
| CV.min | 0.52  | 0.02 | 0.41            | 0.01 | 0.14             | 0.01 | 0.75        | 0.14 | 0.32          | 0.03 |                                                                             |
| AICc   | 0.64  | 0.03 | 0.18            | 0.01 | 0.00             | 0.01 | 0.74        | 0.14 |               |      |                                                                             |
| AIC    | 0.88  | 0.58 | 0.89            | 0.60 | 0.89             | 0.57 | 0.76        | 0.15 |               |      |                                                                             |
| BIC    | 0.08  | 0.01 | 0.01            | 0.01 | 0.00             | 0.01 | 0.12        | 0.02 |               |      |                                                                             |



Table 113: **FDR | Sensitivity for n=1000, continuous design, sparse covariates, and decay 50.**

|        | lasso |      | GL $\gamma = 1$ |      | GL $\gamma = 10$ |      | marginal AL |      | sparsenet MCP |      |                                                                             |
|--------|-------|------|-----------------|------|------------------|------|-------------|------|---------------|------|-----------------------------------------------------------------------------|
| CV.lse | 0.51  | 0.86 | 0.36            | 0.82 | 0.07             | 0.69 | 0.44        | 0.77 | 0.11          | 0.72 | $\text{sd}(\mu)/\sigma = 2$<br>$\rho = 0$<br>$\bar{s}_{Oracle} = 100.0$     |
| CV.min | 0.67  | 0.91 | 0.57            | 0.89 | 0.19             | 0.78 | 0.59        | 0.83 | 0.36          | 0.84 |                                                                             |
| AICc   | 0.58  | 0.89 | 0.49            | 0.87 | 0.23             | 0.78 | 0.55        | 0.81 |               |      |                                                                             |
| AIC    | 0.87  | 0.97 | 0.87            | 0.96 | 0.87             | 0.94 | 0.64        | 0.85 |               |      |                                                                             |
| BIC    | 0.24  | 0.72 | 0.12            | 0.68 | 0.01             | 0.54 | 0.24        | 0.66 |               |      |                                                                             |
| CV.lse | 0.70  | 0.84 | 0.63            | 0.80 | 0.33             | 0.68 | 0.67        | 0.67 | 0.24          | 0.67 | $\text{sd}(\mu)/\sigma = 2$<br>$\rho = 0.5$<br>$\bar{s}_{Oracle} = 100.0$   |
| CV.min | 0.77  | 0.91 | 0.72            | 0.89 | 0.48             | 0.78 | 0.71        | 0.73 | 0.42          | 0.76 |                                                                             |
| AICc   | 0.70  | 0.84 | 0.66            | 0.83 | 0.47             | 0.79 | 0.69        | 0.71 |               |      |                                                                             |
| AIC    | 0.86  | 0.97 | 0.86            | 0.97 | 0.86             | 0.96 | 0.72        | 0.74 |               |      |                                                                             |
| BIC    | 0.32  | 0.35 | 0.38            | 0.50 | 0.16             | 0.51 | 0.49        | 0.44 |               |      |                                                                             |
| CV.lse | 0.76  | 0.82 | 0.73            | 0.78 | 0.61             | 0.67 | 0.57        | 0.20 | 0.54          | 0.63 | $\text{sd}(\mu)/\sigma = 2$<br>$\rho = 0.9$<br>$\bar{s}_{Oracle} = 100.0$   |
| CV.min | 0.79  | 0.89 | 0.77            | 0.88 | 0.66             | 0.77 | 0.61        | 0.24 | 0.60          | 0.70 |                                                                             |
| AICc   | 0.75  | 0.80 | 0.73            | 0.79 | 0.64             | 0.74 | 0.61        | 0.24 |               |      |                                                                             |
| AIC    | 0.79  | 0.89 | 0.78            | 0.90 | 0.76             | 0.91 | 0.61        | 0.24 |               |      |                                                                             |
| BIC    | 0.06  | 0.01 | 0.01            | 0.01 | 0.02             | 0.03 | 0.48        | 0.17 |               |      |                                                                             |
| CV.lse | 0.41  | 0.53 | 0.26            | 0.45 | 0.07             | 0.30 | 0.50        | 0.56 | 0.24          | 0.44 | $\text{sd}(\mu)/\sigma = 1$<br>$\rho = 0$<br>$\bar{s}_{Oracle} = 100.0$     |
| CV.min | 0.64  | 0.67 | 0.52            | 0.60 | 0.18             | 0.41 | 0.66        | 0.67 | 0.54          | 0.62 |                                                                             |
| AICc   | 0.58  | 0.63 | 0.49            | 0.59 | 0.28             | 0.46 | 0.60        | 0.63 |               |      |                                                                             |
| AIC    | 0.89  | 0.92 | 0.89            | 0.91 | 0.89             | 0.89 | 0.78        | 0.77 |               |      |                                                                             |
| BIC    | 0.08  | 0.23 | 0.04            | 0.22 | 0.00             | 0.02 | 0.17        | 0.34 |               |      |                                                                             |
| CV.lse | 0.63  | 0.39 | 0.59            | 0.39 | 0.33             | 0.26 | 0.70        | 0.44 | 0.36          | 0.34 | $\text{sd}(\mu)/\sigma = 1$<br>$\rho = 0.5$<br>$\bar{s}_{Oracle} = 100.0$   |
| CV.min | 0.75  | 0.61 | 0.71            | 0.57 | 0.47             | 0.39 | 0.76        | 0.55 | 0.53          | 0.45 |                                                                             |
| AICc   | 0.71  | 0.53 | 0.68            | 0.52 | 0.57             | 0.51 | 0.74        | 0.51 |               |      |                                                                             |
| AIC    | 0.89  | 0.93 | 0.89            | 0.93 | 0.89             | 0.90 | 0.81        | 0.70 |               |      |                                                                             |
| BIC    | 0.01  | 0.01 | 0.00            | 0.01 | 0.00             | 0.00 | 0.09        | 0.04 |               |      |                                                                             |
| CV.lse | 0.07  | 0.04 | 0.22            | 0.12 | 0.22             | 0.11 | 0.64        | 0.16 | 0.63          | 0.28 | $\text{sd}(\mu)/\sigma = 1$<br>$\rho = 0.9$<br>$\bar{s}_{Oracle} = 100.0$   |
| CV.min | 0.61  | 0.23 | 0.64            | 0.35 | 0.48             | 0.26 | 0.72        | 0.25 | 0.71          | 0.40 |                                                                             |
| AICc   | 0.67  | 0.17 | 0.35            | 0.15 | 0.26             | 0.18 | 0.72        | 0.25 |               |      |                                                                             |
| AIC    | 0.85  | 0.83 | 0.85            | 0.83 | 0.84             | 0.80 | 0.72        | 0.26 |               |      |                                                                             |
| BIC    | 0.06  | 0.01 | 0.01            | 0.01 | 0.00             | 0.01 | 0.12        | 0.02 |               |      |                                                                             |
| CV.lse | 0.08  | 0.03 | 0.03            | 0.01 | 0.00             | 0.00 | 0.60        | 0.29 | 0.07          | 0.03 | $\text{sd}(\mu)/\sigma = 0.5$<br>$\rho = 0$<br>$\bar{s}_{Oracle} = 100.0$   |
| CV.min | 0.56  | 0.26 | 0.33            | 0.14 | 0.07             | 0.03 | 0.75        | 0.44 | 0.55          | 0.25 |                                                                             |
| AICc   | 0.59  | 0.27 | 0.28            | 0.13 | 0.00             | 0.00 | 0.71        | 0.38 |               |      |                                                                             |
| AIC    | 0.90  | 0.90 | 0.90            | 0.89 | 0.90             | 0.89 | 0.85        | 0.67 |               |      |                                                                             |
| BIC    | 0.01  | 0.00 | 0.00            | 0.00 | 0.00             | 0.00 | 0.05        | 0.02 |               |      |                                                                             |
| CV.lse | 0.00  | 0.00 | 0.00            | 0.00 | 0.00             | 0.00 | 0.65        | 0.11 | 0.16          | 0.00 | $\text{sd}(\mu)/\sigma = 0.5$<br>$\rho = 0.5$<br>$\bar{s}_{Oracle} = 100.0$ |
| CV.min | 0.42  | 0.04 | 0.30            | 0.03 | 0.10             | 0.01 | 0.81        | 0.28 | 0.45          | 0.04 |                                                                             |
| AICc   | 0.59  | 0.08 | 0.10            | 0.01 | 0.00             | 0.00 | 0.79        | 0.23 |               |      |                                                                             |
| AIC    | 0.90  | 0.91 | 0.90            | 0.90 | 0.90             | 0.89 | 0.87        | 0.63 |               |      |                                                                             |
| BIC    | 0.01  | 0.00 | 0.00            | 0.00 | 0.00             | 0.00 | 0.08        | 0.01 |               |      |                                                                             |
| CV.lse | 0.00  | 0.00 | 0.00            | 0.00 | 0.00             | 0.00 | 0.13        | 0.01 | 0.00          | 0.00 | $\text{sd}(\mu)/\sigma = 0.5$<br>$\rho = 0.9$<br>$\bar{s}_{Oracle} = 100.0$ |
| CV.min | 0.52  | 0.02 | 0.40            | 0.02 | 0.10             | 0.01 | 0.77        | 0.11 | 0.16          | 0.01 |                                                                             |
| AICc   | 0.62  | 0.03 | 0.11            | 0.01 | 0.00             | 0.01 | 0.79        | 0.12 |               |      |                                                                             |
| AIC    | 0.89  | 0.80 | 0.88            | 0.78 | 0.89             | 0.75 | 0.80        | 0.20 |               |      |                                                                             |
| BIC    | 0.05  | 0.01 | 0.01            | 0.01 | 0.00             | 0.01 | 0.09        | 0.01 |               |      |                                                                             |

Table 114: **FDR | Sensitivity for n=1000, continuous design, sparse covariates, and decay 100.**

|        | lasso |      | GL $\gamma = 1$ |      | GL $\gamma = 10$ |      | marginal AL |      | sparsenet MCP |      |                                                                             |
|--------|-------|------|-----------------|------|------------------|------|-------------|------|---------------|------|-----------------------------------------------------------------------------|
| CV.lse | 0.54  | 0.98 | 0.38            | 0.98 | 0.08             | 0.93 | 0.46        | 0.94 | 0.07          | 0.93 | $\text{sd}(\mu)/\sigma = 2$<br>$\rho = 0$<br>$\bar{s}_{Oracle} = 100.0$     |
| CV.min | 0.68  | 0.99 | 0.56            | 0.99 | 0.17             | 0.97 | 0.58        | 0.96 | 0.23          | 0.97 |                                                                             |
| AICc   | 0.58  | 0.99 | 0.47            | 0.99 | 0.10             | 0.94 | 0.54        | 0.95 |               |      |                                                                             |
| AIC    | 0.87  | 1.00 | 0.87            | 0.99 | 0.87             | 0.98 | 0.67        | 0.97 |               |      |                                                                             |
| BIC    | 0.31  | 0.93 | 0.17            | 0.93 | 0.03             | 0.85 | 0.29        | 0.88 |               |      |                                                                             |
| CV.lse | 0.72  | 0.98 | 0.65            | 0.98 | 0.36             | 0.96 | 0.68        | 0.84 | 0.28          | 0.96 | $\text{sd}(\mu)/\sigma = 2$<br>$\rho = 0.5$<br>$\bar{s}_{Oracle} = 100.0$   |
| CV.min | 0.78  | 1.00 | 0.72            | 0.99 | 0.48             | 0.99 | 0.72        | 0.90 | 0.41          | 0.98 |                                                                             |
| AICc   | 0.70  | 0.98 | 0.65            | 0.98 | 0.38             | 0.97 | 0.70        | 0.87 |               |      |                                                                             |
| AIC    | 0.87  | 1.00 | 0.87            | 1.00 | 0.86             | 1.00 | 0.74        | 0.91 |               |      |                                                                             |
| BIC    | 0.01  | 0.01 | 0.02            | 0.04 | 0.26             | 0.89 | 0.10        | 0.09 |               |      |                                                                             |
| CV.lse | 0.76  | 0.98 | 0.72            | 0.97 | 0.58             | 0.95 | 0.63        | 0.25 | 0.52          | 0.94 | $\text{sd}(\mu)/\sigma = 2$<br>$\rho = 0.9$<br>$\bar{s}_{Oracle} = 100.0$   |
| CV.min | 0.80  | 0.99 | 0.77            | 0.99 | 0.63             | 0.98 | 0.67        | 0.35 | 0.57          | 0.97 |                                                                             |
| AICc   | 0.74  | 0.96 | 0.71            | 0.97 | 0.57             | 0.96 | 0.66        | 0.34 |               |      |                                                                             |
| AIC    | 0.80  | 0.99 | 0.79            | 1.00 | 0.77             | 1.00 | 0.66        | 0.35 |               |      |                                                                             |
| BIC    | 0.09  | 0.02 | 0.03            | 0.01 | 0.01             | 0.02 | 0.14        | 0.03 |               |      |                                                                             |
| CV.lse | 0.43  | 0.66 | 0.28            | 0.55 | 0.09             | 0.31 | 0.51        | 0.71 | 0.38          | 0.64 | $\text{sd}(\mu)/\sigma = 1$<br>$\rho = 0$<br>$\bar{s}_{Oracle} = 100.0$     |
| CV.min | 0.64  | 0.82 | 0.51            | 0.74 | 0.22             | 0.49 | 0.65        | 0.81 | 0.62          | 0.81 |                                                                             |
| AICc   | 0.56  | 0.77 | 0.48            | 0.72 | 0.42             | 0.64 | 0.59        | 0.77 |               |      |                                                                             |
| AIC    | 0.89  | 0.95 | 0.89            | 0.93 | 0.89             | 0.90 | 0.78        | 0.89 |               |      |                                                                             |
| BIC    | 0.00  | 0.02 | 0.00            | 0.03 | 0.00             | 0.00 | 0.10        | 0.27 |               |      |                                                                             |
| CV.lse | 0.41  | 0.27 | 0.42            | 0.30 | 0.06             | 0.05 | 0.69        | 0.49 | 0.43          | 0.35 | $\text{sd}(\mu)/\sigma = 1$<br>$\rho = 0.5$<br>$\bar{s}_{Oracle} = 100.0$   |
| CV.min | 0.71  | 0.67 | 0.67            | 0.64 | 0.25             | 0.20 | 0.74        | 0.64 | 0.60          | 0.58 |                                                                             |
| AICc   | 0.68  | 0.54 | 0.65            | 0.60 | 0.60             | 0.66 | 0.72        | 0.57 |               |      |                                                                             |
| AIC    | 0.89  | 0.96 | 0.88            | 0.96 | 0.89             | 0.93 | 0.82        | 0.83 |               |      |                                                                             |
| BIC    | 0.01  | 0.00 | 0.00            | 0.00 | 0.00             | 0.00 | 0.05        | 0.01 |               |      |                                                                             |
| CV.lse | 0.01  | 0.01 | 0.02            | 0.01 | 0.00             | 0.01 | 0.52        | 0.11 | 0.11          | 0.07 | $\text{sd}(\mu)/\sigma = 1$<br>$\rho = 0.9$<br>$\bar{s}_{Oracle} = 100.0$   |
| CV.min | 0.55  | 0.05 | 0.48            | 0.09 | 0.14             | 0.02 | 0.73        | 0.26 | 0.41          | 0.21 |                                                                             |
| AICc   | 0.63  | 0.05 | 0.17            | 0.03 | 0.04             | 0.04 | 0.73        | 0.28 |               |      |                                                                             |
| AIC    | 0.85  | 0.93 | 0.85            | 0.93 | 0.84             | 0.90 | 0.74        | 0.36 |               |      |                                                                             |
| BIC    | 0.07  | 0.01 | 0.02            | 0.01 | 0.00             | 0.01 | 0.08        | 0.01 |               |      |                                                                             |
| CV.lse | 0.05  | 0.01 | 0.01            | 0.00 | 0.00             | 0.00 | 0.60        | 0.30 | 0.07          | 0.01 | $\text{sd}(\mu)/\sigma = 0.5$<br>$\rho = 0$<br>$\bar{s}_{Oracle} = 100.0$   |
| CV.min | 0.51  | 0.24 | 0.20            | 0.07 | 0.04             | 0.01 | 0.74        | 0.49 | 0.51          | 0.24 |                                                                             |
| AICc   | 0.56  | 0.26 | 0.18            | 0.09 | 0.00             | 0.00 | 0.69        | 0.41 |               |      |                                                                             |
| AIC    | 0.90  | 0.91 | 0.90            | 0.89 | 0.90             | 0.90 | 0.85        | 0.73 |               |      |                                                                             |
| BIC    | 0.00  | 0.00 | 0.00            | 0.00 | 0.02             | 0.02 | 0.04        | 0.01 |               |      |                                                                             |
| CV.lse | 0.00  | 0.00 | 0.00            | 0.00 | 0.00             | 0.00 | 0.62        | 0.09 | 0.22          | 0.00 | $\text{sd}(\mu)/\sigma = 0.5$<br>$\rho = 0.5$<br>$\bar{s}_{Oracle} = 100.0$ |
| CV.min | 0.36  | 0.03 | 0.21            | 0.01 | 0.07             | 0.00 | 0.81        | 0.27 | 0.45          | 0.03 |                                                                             |
| AICc   | 0.54  | 0.06 | 0.05            | 0.00 | 0.00             | 0.00 | 0.79        | 0.21 |               |      |                                                                             |
| AIC    | 0.90  | 0.92 | 0.90            | 0.90 | 0.90             | 0.90 | 0.87        | 0.68 |               |      |                                                                             |
| BIC    | 0.01  | 0.00 | 0.00            | 0.00 | 0.00             | 0.00 | 0.07        | 0.00 |               |      |                                                                             |
| CV.lse | 0.00  | 0.00 | 0.00            | 0.00 | 0.00             | 0.00 | 0.08        | 0.01 | 0.04          | 0.00 | $\text{sd}(\mu)/\sigma = 0.5$<br>$\rho = 0.9$<br>$\bar{s}_{Oracle} = 100.0$ |
| CV.min | 0.51  | 0.02 | 0.41            | 0.02 | 0.13             | 0.01 | 0.78        | 0.07 | 0.31          | 0.02 |                                                                             |
| AICc   | 0.63  | 0.03 | 0.11            | 0.01 | 0.01             | 0.01 | 0.79        | 0.08 |               |      |                                                                             |
| AIC    | 0.89  | 0.84 | 0.89            | 0.82 | 0.89             | 0.80 | 0.81        | 0.17 |               |      |                                                                             |
| BIC    | 0.04  | 0.01 | 0.01            | 0.01 | 0.00             | 0.00 | 0.10        | 0.01 |               |      |                                                                             |

Table 115: **FDR | Sensitivity for n=1000, continuous design, sparse covariates, and decay 200.**

|        | lasso |      | GL $\gamma = 1$ |      | GL $\gamma = 10$ |      | marginal AL |      | sparsenet MCP |      |                                                                             |
|--------|-------|------|-----------------|------|------------------|------|-------------|------|---------------|------|-----------------------------------------------------------------------------|
| CV.lse | 0.55  | 1.00 | 0.35            | 1.00 | 0.06             | 0.99 | 0.46        | 0.98 | 0.04          | 0.98 | $\text{sd}(\mu)/\sigma = 2$<br>$\rho = 0$<br>$\bar{s}_{Oracle} = 100.0$     |
| CV.min | 0.68  | 1.00 | 0.54            | 1.00 | 0.13             | 1.00 | 0.58        | 0.99 | 0.14          | 0.99 |                                                                             |
| AICc   | 0.58  | 1.00 | 0.44            | 1.00 | 0.03             | 0.98 | 0.53        | 0.98 |               |      |                                                                             |
| AIC    | 0.87  | 1.00 | 0.87            | 1.00 | 0.87             | 0.99 | 0.68        | 0.99 |               |      |                                                                             |
| BIC    | 0.34  | 0.98 | 0.18            | 0.98 | 0.02             | 0.96 | 0.33        | 0.95 |               |      |                                                                             |
| CV.lse | 0.73  | 1.00 | 0.64            | 1.00 | 0.31             | 1.00 | 0.68        | 0.90 | 0.11          | 1.00 | $\text{sd}(\mu)/\sigma = 2$<br>$\rho = 0.5$<br>$\bar{s}_{Oracle} = 100.0$   |
| CV.min | 0.78  | 1.00 | 0.71            | 1.00 | 0.38             | 1.00 | 0.73        | 0.94 | 0.19          | 1.00 |                                                                             |
| AICc   | 0.71  | 1.00 | 0.63            | 1.00 | 0.22             | 1.00 | 0.70        | 0.92 |               |      |                                                                             |
| AIC    | 0.87  | 1.00 | 0.87            | 1.00 | 0.87             | 1.00 | 0.76        | 0.95 |               |      |                                                                             |
| BIC    | 0.00  | 0.01 | 0.04            | 0.08 | 0.20             | 0.99 | 0.05        | 0.03 |               |      |                                                                             |
| CV.lse | 0.77  | 1.00 | 0.72            | 1.00 | 0.56             | 1.00 | 0.63        | 0.30 | 0.46          | 1.00 | $\text{sd}(\mu)/\sigma = 2$<br>$\rho = 0.9$<br>$\bar{s}_{Oracle} = 100.0$   |
| CV.min | 0.81  | 1.00 | 0.77            | 1.00 | 0.60             | 1.00 | 0.67        | 0.47 | 0.52          | 1.00 |                                                                             |
| AICc   | 0.74  | 0.99 | 0.70            | 1.00 | 0.51             | 0.99 | 0.67        | 0.46 |               |      |                                                                             |
| AIC    | 0.81  | 1.00 | 0.80            | 1.00 | 0.79             | 1.00 | 0.67        | 0.48 |               |      |                                                                             |
| BIC    | 0.14  | 0.02 | 0.06            | 0.02 | 0.14             | 0.28 | 0.13        | 0.02 |               |      |                                                                             |
| CV.lse | 0.44  | 0.72 | 0.27            | 0.57 | 0.09             | 0.25 | 0.51        | 0.77 | 0.42          | 0.72 | $\text{sd}(\mu)/\sigma = 1$<br>$\rho = 0$<br>$\bar{s}_{Oracle} = 100.0$     |
| CV.min | 0.64  | 0.87 | 0.49            | 0.79 | 0.22             | 0.48 | 0.64        | 0.86 | 0.64          | 0.87 |                                                                             |
| AICc   | 0.56  | 0.83 | 0.48            | 0.78 | 0.43             | 0.67 | 0.58        | 0.82 |               |      |                                                                             |
| AIC    | 0.89  | 0.96 | 0.89            | 0.94 | 0.89             | 0.91 | 0.78        | 0.93 |               |      |                                                                             |
| BIC    | 0.00  | 0.01 | 0.00            | 0.00 | 0.00             | 0.00 | 0.05        | 0.14 |               |      |                                                                             |
| CV.lse | 0.24  | 0.14 | 0.22            | 0.15 | 0.01             | 0.01 | 0.68        | 0.49 | 0.28          | 0.18 | $\text{sd}(\mu)/\sigma = 1$<br>$\rho = 0.5$<br>$\bar{s}_{Oracle} = 100.0$   |
| CV.min | 0.65  | 0.60 | 0.56            | 0.53 | 0.10             | 0.04 | 0.74        | 0.66 | 0.61          | 0.57 |                                                                             |
| AICc   | 0.63  | 0.46 | 0.61            | 0.62 | 0.60             | 0.73 | 0.71        | 0.59 |               |      |                                                                             |
| AIC    | 0.88  | 0.97 | 0.88            | 0.97 | 0.89             | 0.94 | 0.82        | 0.88 |               |      |                                                                             |
| BIC    | 0.01  | 0.00 | 0.00            | 0.00 | 0.00             | 0.00 | 0.05        | 0.01 |               |      |                                                                             |
| CV.lse | 0.01  | 0.01 | 0.01            | 0.01 | 0.01             | 0.01 | 0.32        | 0.06 | 0.02          | 0.01 | $\text{sd}(\mu)/\sigma = 1$<br>$\rho = 0.9$<br>$\bar{s}_{Oracle} = 100.0$   |
| CV.min | 0.57  | 0.05 | 0.50            | 0.04 | 0.16             | 0.02 | 0.73        | 0.24 | 0.29          | 0.05 |                                                                             |
| AICc   | 0.64  | 0.05 | 0.20            | 0.02 | 0.04             | 0.04 | 0.73        | 0.26 |               |      |                                                                             |
| AIC    | 0.85  | 0.96 | 0.85            | 0.96 | 0.85             | 0.94 | 0.75        | 0.47 |               |      |                                                                             |
| BIC    | 0.11  | 0.02 | 0.04            | 0.01 | 0.01             | 0.01 | 0.14        | 0.02 |               |      |                                                                             |
| CV.lse | 0.04  | 0.01 | 0.01            | 0.00 | 0.00             | 0.00 | 0.60        | 0.31 | 0.07          | 0.01 | $\text{sd}(\mu)/\sigma = 0.5$<br>$\rho = 0$<br>$\bar{s}_{Oracle} = 100.0$   |
| CV.min | 0.48  | 0.22 | 0.15            | 0.04 | 0.04             | 0.01 | 0.73        | 0.50 | 0.49          | 0.22 |                                                                             |
| AICc   | 0.54  | 0.25 | 0.13            | 0.07 | 0.00             | 0.00 | 0.69        | 0.42 |               |      |                                                                             |
| AIC    | 0.90  | 0.91 | 0.90            | 0.89 | 0.90             | 0.90 | 0.85        | 0.75 |               |      |                                                                             |
| BIC    | 0.00  | 0.00 | 0.00            | 0.00 | 0.18             | 0.17 | 0.04        | 0.01 |               |      |                                                                             |
| CV.lse | 0.00  | 0.00 | 0.00            | 0.00 | 0.00             | 0.00 | 0.60        | 0.08 | 0.24          | 0.00 | $\text{sd}(\mu)/\sigma = 0.5$<br>$\rho = 0.5$<br>$\bar{s}_{Oracle} = 100.0$ |
| CV.min | 0.34  | 0.03 | 0.18            | 0.01 | 0.07             | 0.00 | 0.81        | 0.26 | 0.45          | 0.03 |                                                                             |
| AICc   | 0.53  | 0.06 | 0.03            | 0.00 | 0.00             | 0.00 | 0.79        | 0.21 |               |      |                                                                             |
| AIC    | 0.90  | 0.92 | 0.90            | 0.90 | 0.90             | 0.90 | 0.86        | 0.69 |               |      |                                                                             |
| BIC    | 0.02  | 0.00 | 0.00            | 0.00 | 0.00             | 0.00 | 0.07        | 0.00 |               |      |                                                                             |
| CV.lse | 0.00  | 0.00 | 0.00            | 0.00 | 0.00             | 0.00 | 0.09        | 0.01 | 0.08          | 0.00 | $\text{sd}(\mu)/\sigma = 0.5$<br>$\rho = 0.9$<br>$\bar{s}_{Oracle} = 100.0$ |
| CV.min | 0.49  | 0.02 | 0.38            | 0.01 | 0.14             | 0.01 | 0.79        | 0.06 | 0.39          | 0.02 |                                                                             |
| AICc   | 0.62  | 0.03 | 0.11            | 0.01 | 0.01             | 0.00 | 0.79        | 0.07 |               |      |                                                                             |
| AIC    | 0.89  | 0.86 | 0.89            | 0.83 | 0.89             | 0.82 | 0.81        | 0.17 |               |      |                                                                             |
| BIC    | 0.04  | 0.01 | 0.01            | 0.00 | 0.00             | 0.00 | 0.11        | 0.01 |               |      |                                                                             |

Table 116: **FDR | Sensitivity for n=100, binary design, dense covariates, and decay 10.**

|        | lasso |      | GL $\gamma = 1$ |      | GL $\gamma = 10$ |      | marginal AL |      | sparsenet MCP |      |                                                                           |
|--------|-------|------|-----------------|------|------------------|------|-------------|------|---------------|------|---------------------------------------------------------------------------|
| CV.1se | 0.32  | 0.24 | 0.20            | 0.21 | 0.04             | 0.10 | 0.74        | 0.44 | 0.18          | 0.21 | $\text{sd}(\mu)/\sigma = 2$<br>$\rho = 0$<br>$\bar{s}_{Oracle} = 21.3$    |
| CV.min | 0.74  | 0.46 | 0.57            | 0.39 | 0.17             | 0.19 | 0.84        | 0.51 | 0.54          | 0.40 |                                                                           |
| AICc   | 0.59  | 0.37 | 0.44            | 0.34 | 0.82             | 0.42 | 0.68        | 0.40 |               |      |                                                                           |
| AIC    | 0.89  | 0.59 | 0.88            | 0.55 | 0.88             | 0.44 | 0.87        | 0.54 |               |      |                                                                           |
| BIC    | 0.89  | 0.58 | 0.88            | 0.55 | 0.88             | 0.44 | 0.84        | 0.52 |               |      |                                                                           |
| CV.1se | 0.29  | 0.18 | 0.20            | 0.17 | 0.04             | 0.09 | 0.76        | 0.42 | 0.15          | 0.18 | $\text{sd}(\mu)/\sigma = 2$<br>$\rho = 0.5$<br>$\bar{s}_{Oracle} = 20.9$  |
| CV.min | 0.72  | 0.41 | 0.57            | 0.35 | 0.17             | 0.17 | 0.86        | 0.49 | 0.49          | 0.35 |                                                                           |
| AICc   | 0.60  | 0.33 | 0.45            | 0.31 | 0.83             | 0.40 | 0.70        | 0.37 |               |      |                                                                           |
| AIC    | 0.90  | 0.57 | 0.89            | 0.54 | 0.89             | 0.43 | 0.88        | 0.52 |               |      |                                                                           |
| BIC    | 0.90  | 0.56 | 0.89            | 0.54 | 0.89             | 0.43 | 0.86        | 0.50 |               |      |                                                                           |
| CV.1se | 0.28  | 0.17 | 0.19            | 0.15 | 0.04             | 0.08 | 0.77        | 0.40 | 0.17          | 0.17 | $\text{sd}(\mu)/\sigma = 2$<br>$\rho = 0.9$<br>$\bar{s}_{Oracle} = 20.7$  |
| CV.min | 0.74  | 0.39 | 0.57            | 0.32 | 0.16             | 0.15 | 0.86        | 0.47 | 0.50          | 0.32 |                                                                           |
| AICc   | 0.62  | 0.30 | 0.46            | 0.29 | 0.84             | 0.38 | 0.72        | 0.35 |               |      |                                                                           |
| AIC    | 0.90  | 0.55 | 0.89            | 0.52 | 0.89             | 0.41 | 0.89        | 0.49 |               |      |                                                                           |
| BIC    | 0.90  | 0.55 | 0.89            | 0.52 | 0.89             | 0.40 | 0.86        | 0.48 |               |      |                                                                           |
| CV.1se | 0.10  | 0.05 | 0.06            | 0.03 | 0.02             | 0.02 | 0.85        | 0.42 | 0.16          | 0.05 | $\text{sd}(\mu)/\sigma = 1$<br>$\rho = 0$<br>$\bar{s}_{Oracle} = 14.5$    |
| CV.min | 0.57  | 0.25 | 0.35            | 0.14 | 0.12             | 0.05 | 0.91        | 0.49 | 0.51          | 0.23 |                                                                           |
| AICc   | 0.55  | 0.23 | 0.46            | 0.21 | 0.93             | 0.29 | 0.78        | 0.34 |               |      |                                                                           |
| AIC    | 0.94  | 0.54 | 0.94            | 0.46 | 0.94             | 0.31 | 0.93        | 0.51 |               |      |                                                                           |
| BIC    | 0.93  | 0.54 | 0.94            | 0.46 | 0.94             | 0.30 | 0.92        | 0.51 |               |      |                                                                           |
| CV.1se | 0.08  | 0.03 | 0.05            | 0.02 | 0.02             | 0.02 | 0.86        | 0.40 | 0.15          | 0.04 | $\text{sd}(\mu)/\sigma = 1$<br>$\rho = 0.5$<br>$\bar{s}_{Oracle} = 14.4$  |
| CV.min | 0.56  | 0.22 | 0.34            | 0.13 | 0.12             | 0.05 | 0.92        | 0.47 | 0.51          | 0.20 |                                                                           |
| AICc   | 0.56  | 0.20 | 0.45            | 0.17 | 0.93             | 0.28 | 0.80        | 0.31 |               |      |                                                                           |
| AIC    | 0.94  | 0.51 | 0.94            | 0.44 | 0.95             | 0.30 | 0.93        | 0.48 |               |      |                                                                           |
| BIC    | 0.94  | 0.51 | 0.94            | 0.44 | 0.95             | 0.30 | 0.93        | 0.48 |               |      |                                                                           |
| CV.1se | 0.08  | 0.03 | 0.06            | 0.03 | 0.02             | 0.02 | 0.86        | 0.38 | 0.17          | 0.05 | $\text{sd}(\mu)/\sigma = 1$<br>$\rho = 0.9$<br>$\bar{s}_{Oracle} = 14.1$  |
| CV.min | 0.58  | 0.21 | 0.35            | 0.12 | 0.13             | 0.05 | 0.92        | 0.46 | 0.53          | 0.19 |                                                                           |
| AICc   | 0.58  | 0.19 | 0.42            | 0.16 | 0.93             | 0.27 | 0.81        | 0.30 |               |      |                                                                           |
| AIC    | 0.94  | 0.51 | 0.94            | 0.43 | 0.95             | 0.29 | 0.93        | 0.47 |               |      |                                                                           |
| BIC    | 0.94  | 0.51 | 0.94            | 0.43 | 0.95             | 0.29 | 0.93        | 0.47 |               |      |                                                                           |
| CV.1se | 0.03  | 0.01 | 0.01            | 0.00 | 0.01             | 0.00 | 0.94        | 0.34 | 0.30          | 0.02 | $\text{sd}(\mu)/\sigma = 0.5$<br>$\rho = 0$<br>$\bar{s}_{Oracle} = 7.8$   |
| CV.min | 0.43  | 0.10 | 0.22            | 0.03 | 0.10             | 0.01 | 0.96        | 0.42 | 0.55          | 0.10 |                                                                           |
| AICc   | 0.55  | 0.11 | 0.79            | 0.19 | 0.98             | 0.20 | 0.91        | 0.23 |               |      |                                                                           |
| AIC    | 0.97  | 0.46 | 0.98            | 0.34 | 0.98             | 0.22 | 0.97        | 0.44 |               |      |                                                                           |
| BIC    | 0.97  | 0.46 | 0.97            | 0.34 | 0.98             | 0.22 | 0.97        | 0.44 |               |      |                                                                           |
| CV.1se | 0.03  | 0.01 | 0.02            | 0.01 | 0.02             | 0.00 | 0.94        | 0.32 | 0.30          | 0.01 | $\text{sd}(\mu)/\sigma = 0.5$<br>$\rho = 0.5$<br>$\bar{s}_{Oracle} = 8.0$ |
| CV.min | 0.43  | 0.09 | 0.23            | 0.03 | 0.12             | 0.01 | 0.96        | 0.40 | 0.58          | 0.09 |                                                                           |
| AICc   | 0.56  | 0.09 | 0.75            | 0.16 | 0.98             | 0.18 | 0.90        | 0.23 |               |      |                                                                           |
| AIC    | 0.97  | 0.43 | 0.98            | 0.32 | 0.98             | 0.20 | 0.97        | 0.42 |               |      |                                                                           |
| BIC    | 0.97  | 0.43 | 0.98            | 0.31 | 0.98             | 0.20 | 0.97        | 0.42 |               |      |                                                                           |
| CV.1se | 0.03  | 0.01 | 0.03            | 0.00 | 0.02             | 0.00 | 0.94        | 0.32 | 0.31          | 0.02 | $\text{sd}(\mu)/\sigma = 0.5$<br>$\rho = 0.9$<br>$\bar{s}_{Oracle} = 7.6$ |
| CV.min | 0.45  | 0.10 | 0.21            | 0.03 | 0.10             | 0.02 | 0.97        | 0.39 | 0.61          | 0.10 |                                                                           |
| AICc   | 0.57  | 0.10 | 0.71            | 0.17 | 0.98             | 0.19 | 0.92        | 0.23 |               |      |                                                                           |
| AIC    | 0.97  | 0.45 | 0.98            | 0.33 | 0.98             | 0.21 | 0.97        | 0.41 |               |      |                                                                           |
| BIC    | 0.97  | 0.44 | 0.98            | 0.33 | 0.98             | 0.20 | 0.97        | 0.41 |               |      |                                                                           |

Table 117: **FDR | Sensitivity for n=100, binary design, dense covariates, and decay 50.**

|        | lasso |      | GL $\gamma = 1$ |      | GL $\gamma = 10$ |      | marginal AL |      | sparsenet MCP |      |                                                                           |
|--------|-------|------|-----------------|------|------------------|------|-------------|------|---------------|------|---------------------------------------------------------------------------|
| CV.1se | 0.07  | 0.01 | 0.02            | 0.00 | 0.02             | 0.00 | 0.79        | 0.19 | 0.21          | 0.01 | $\text{sd}(\mu)/\sigma = 2$<br>$\rho = 0$<br>$\bar{s}_{Oracle} = 56.8$    |
| CV.min | 0.46  | 0.07 | 0.18            | 0.01 | 0.08             | 0.01 | 0.84        | 0.25 | 0.53          | 0.08 |                                                                           |
| AICc   | 0.47  | 0.05 | 0.77            | 0.12 | 0.89             | 0.11 | 0.72        | 0.11 |               |      |                                                                           |
| AIC    | 0.86  | 0.29 | 0.88            | 0.21 | 0.90             | 0.13 | 0.85        | 0.26 |               |      |                                                                           |
| BIC    | 0.86  | 0.29 | 0.88            | 0.20 | 0.90             | 0.13 | 0.85        | 0.26 |               |      |                                                                           |
| CV.1se | 0.05  | 0.00 | 0.02            | 0.00 | 0.01             | 0.00 | 0.80        | 0.17 | 0.20          | 0.01 | $\text{sd}(\mu)/\sigma = 2$<br>$\rho = 0.5$<br>$\bar{s}_{Oracle} = 56.2$  |
| CV.min | 0.45  | 0.06 | 0.20            | 0.01 | 0.08             | 0.00 | 0.84        | 0.23 | 0.50          | 0.06 |                                                                           |
| AICc   | 0.48  | 0.04 | 0.76            | 0.11 | 0.89             | 0.11 | 0.74        | 0.11 |               |      |                                                                           |
| AIC    | 0.87  | 0.28 | 0.88            | 0.20 | 0.91             | 0.12 | 0.86        | 0.25 |               |      |                                                                           |
| BIC    | 0.87  | 0.28 | 0.88            | 0.20 | 0.91             | 0.12 | 0.86        | 0.25 |               |      |                                                                           |
| CV.1se | 0.05  | 0.01 | 0.03            | 0.00 | 0.01             | 0.00 | 0.80        | 0.16 | 0.22          | 0.01 | $\text{sd}(\mu)/\sigma = 2$<br>$\rho = 0.9$<br>$\bar{s}_{Oracle} = 56.5$  |
| CV.min | 0.44  | 0.06 | 0.21            | 0.01 | 0.10             | 0.00 | 0.85        | 0.22 | 0.51          | 0.06 |                                                                           |
| AICc   | 0.48  | 0.04 | 0.73            | 0.10 | 0.90             | 0.10 | 0.76        | 0.10 |               |      |                                                                           |
| AIC    | 0.87  | 0.27 | 0.89            | 0.20 | 0.91             | 0.12 | 0.86        | 0.24 |               |      |                                                                           |
| BIC    | 0.87  | 0.27 | 0.89            | 0.19 | 0.91             | 0.12 | 0.86        | 0.24 |               |      |                                                                           |
| CV.1se | 0.04  | 0.00 | 0.01            | 0.00 | 0.01             | 0.00 | 0.88        | 0.19 | 0.28          | 0.01 | $\text{sd}(\mu)/\sigma = 1$<br>$\rho = 0$<br>$\bar{s}_{Oracle} = 31.7$    |
| CV.min | 0.43  | 0.05 | 0.18            | 0.01 | 0.09             | 0.00 | 0.91        | 0.25 | 0.55          | 0.05 |                                                                           |
| AICc   | 0.52  | 0.04 | 0.90            | 0.13 | 0.94             | 0.11 | 0.84        | 0.11 |               |      |                                                                           |
| AIC    | 0.92  | 0.30 | 0.94            | 0.20 | 0.95             | 0.12 | 0.92        | 0.27 |               |      |                                                                           |
| BIC    | 0.92  | 0.29 | 0.94            | 0.20 | 0.95             | 0.12 | 0.92        | 0.27 |               |      |                                                                           |
| CV.1se | 0.03  | 0.00 | 0.03            | 0.00 | 0.01             | 0.00 | 0.89        | 0.17 | 0.27          | 0.01 | $\text{sd}(\mu)/\sigma = 1$<br>$\rho = 0.5$<br>$\bar{s}_{Oracle} = 31.4$  |
| CV.min | 0.43  | 0.04 | 0.21            | 0.01 | 0.08             | 0.00 | 0.92        | 0.23 | 0.54          | 0.04 |                                                                           |
| AICc   | 0.52  | 0.04 | 0.90            | 0.12 | 0.94             | 0.11 | 0.85        | 0.11 |               |      |                                                                           |
| AIC    | 0.93  | 0.28 | 0.94            | 0.19 | 0.95             | 0.12 | 0.92        | 0.25 |               |      |                                                                           |
| BIC    | 0.93  | 0.28 | 0.94            | 0.19 | 0.95             | 0.12 | 0.92        | 0.25 |               |      |                                                                           |
| CV.1se | 0.03  | 0.00 | 0.02            | 0.00 | 0.01             | 0.00 | 0.89        | 0.17 | 0.26          | 0.01 | $\text{sd}(\mu)/\sigma = 1$<br>$\rho = 0.9$<br>$\bar{s}_{Oracle} = 31.0$  |
| CV.min | 0.42  | 0.04 | 0.20            | 0.01 | 0.10             | 0.00 | 0.92        | 0.23 | 0.55          | 0.04 |                                                                           |
| AICc   | 0.52  | 0.04 | 0.89            | 0.12 | 0.95             | 0.10 | 0.86        | 0.10 |               |      |                                                                           |
| AIC    | 0.93  | 0.27 | 0.94            | 0.19 | 0.95             | 0.12 | 0.93        | 0.25 |               |      |                                                                           |
| BIC    | 0.93  | 0.27 | 0.94            | 0.18 | 0.95             | 0.12 | 0.93        | 0.24 |               |      |                                                                           |
| CV.1se | 0.03  | 0.00 | 0.01            | 0.00 | 0.02             | 0.00 | 0.96        | 0.19 | 0.31          | 0.01 | $\text{sd}(\mu)/\sigma = 0.5$<br>$\rho = 0$<br>$\bar{s}_{Oracle} = 8.5$   |
| CV.min | 0.40  | 0.04 | 0.16            | 0.01 | 0.10             | 0.00 | 0.98        | 0.25 | 0.61          | 0.04 |                                                                           |
| AICc   | 0.57  | 0.04 | 0.98            | 0.13 | 0.98             | 0.11 | 0.94        | 0.11 |               |      |                                                                           |
| AIC    | 0.98  | 0.29 | 0.98            | 0.18 | 0.99             | 0.12 | 0.98        | 0.27 |               |      |                                                                           |
| BIC    | 0.98  | 0.29 | 0.98            | 0.17 | 0.99             | 0.12 | 0.98        | 0.27 |               |      |                                                                           |
| CV.1se | 0.01  | 0.00 | 0.02            | 0.00 | 0.01             | 0.00 | 0.97        | 0.18 | 0.34          | 0.01 | $\text{sd}(\mu)/\sigma = 0.5$<br>$\rho = 0.5$<br>$\bar{s}_{Oracle} = 8.9$ |
| CV.min | 0.42  | 0.03 | 0.16            | 0.01 | 0.10             | 0.00 | 0.98        | 0.24 | 0.59          | 0.03 |                                                                           |
| AICc   | 0.53  | 0.03 | 0.98            | 0.13 | 0.98             | 0.12 | 0.94        | 0.11 |               |      |                                                                           |
| AIC    | 0.98  | 0.28 | 0.98            | 0.18 | 0.99             | 0.13 | 0.98        | 0.26 |               |      |                                                                           |
| BIC    | 0.98  | 0.28 | 0.98            | 0.18 | 0.98             | 0.13 | 0.98        | 0.26 |               |      |                                                                           |
| CV.1se | 0.02  | 0.00 | 0.01            | 0.00 | 0.01             | 0.00 | 0.96        | 0.18 | 0.33          | 0.01 | $\text{sd}(\mu)/\sigma = 0.5$<br>$\rho = 0.9$<br>$\bar{s}_{Oracle} = 8.1$ |
| CV.min | 0.41  | 0.04 | 0.18            | 0.01 | 0.10             | 0.01 | 0.98        | 0.25 | 0.62          | 0.04 |                                                                           |
| AICc   | 0.59  | 0.04 | 0.98            | 0.13 | 0.99             | 0.12 | 0.95        | 0.12 |               |      |                                                                           |
| AIC    | 0.98  | 0.29 | 0.98            | 0.19 | 0.99             | 0.12 | 0.98        | 0.27 |               |      |                                                                           |
| BIC    | 0.98  | 0.29 | 0.98            | 0.18 | 0.99             | 0.12 | 0.98        | 0.27 |               |      |                                                                           |

Table 118: **FDR | Sensitivity for n=100, binary design, dense covariates, and decay 100.**

|        | lasso |      | GL $\gamma = 1$ |      | GL $\gamma = 10$ |      | marginal AL |      | sparsenet MCP |      |                                                                           |
|--------|-------|------|-----------------|------|------------------|------|-------------|------|---------------|------|---------------------------------------------------------------------------|
| CV.1se | 0.05  | 0.00 | 0.02            | 0.00 | 0.01             | 0.00 | 0.80        | 0.13 | 0.24          | 0.00 | $\text{sd}(\mu)/\sigma = 2$<br>$\rho = 0$<br>$\bar{s}_{Oracle} = 78.1$    |
| CV.min | 0.42  | 0.04 | 0.16            | 0.01 | 0.09             | 0.00 | 0.83        | 0.18 | 0.53          | 0.04 |                                                                           |
| AICc   | 0.45  | 0.03 | 0.83            | 0.10 | 0.88             | 0.09 | 0.75        | 0.07 |               |      |                                                                           |
| AIC    | 0.85  | 0.23 | 0.87            | 0.15 | 0.89             | 0.10 | 0.84        | 0.20 |               |      |                                                                           |
| BIC    | 0.85  | 0.23 | 0.87            | 0.15 | 0.89             | 0.10 | 0.84        | 0.20 |               |      |                                                                           |
| CV.1se | 0.03  | 0.00 | 0.02            | 0.00 | 0.01             | 0.00 | 0.81        | 0.12 | 0.22          | 0.00 | $\text{sd}(\mu)/\sigma = 2$<br>$\rho = 0.5$<br>$\bar{s}_{Oracle} = 77.8$  |
| CV.min | 0.43  | 0.03 | 0.18            | 0.00 | 0.09             | 0.00 | 0.84        | 0.17 | 0.51          | 0.03 |                                                                           |
| AICc   | 0.47  | 0.02 | 0.84            | 0.09 | 0.89             | 0.08 | 0.76        | 0.07 |               |      |                                                                           |
| AIC    | 0.86  | 0.21 | 0.88            | 0.15 | 0.89             | 0.10 | 0.85        | 0.19 |               |      |                                                                           |
| BIC    | 0.86  | 0.21 | 0.88            | 0.14 | 0.89             | 0.10 | 0.85        | 0.19 |               |      |                                                                           |
| CV.1se | 0.04  | 0.00 | 0.03            | 0.00 | 0.01             | 0.00 | 0.81        | 0.12 | 0.26          | 0.00 | $\text{sd}(\mu)/\sigma = 2$<br>$\rho = 0.9$<br>$\bar{s}_{Oracle} = 77.2$  |
| CV.min | 0.44  | 0.03 | 0.20            | 0.00 | 0.09             | 0.00 | 0.84        | 0.17 | 0.55          | 0.03 |                                                                           |
| AICc   | 0.51  | 0.02 | 0.84            | 0.09 | 0.89             | 0.08 | 0.77        | 0.06 |               |      |                                                                           |
| AIC    | 0.86  | 0.21 | 0.88            | 0.14 | 0.89             | 0.10 | 0.85        | 0.19 |               |      |                                                                           |
| BIC    | 0.86  | 0.21 | 0.88            | 0.14 | 0.89             | 0.09 | 0.85        | 0.18 |               |      |                                                                           |
| CV.1se | 0.04  | 0.00 | 0.01            | 0.00 | 0.01             | 0.00 | 0.90        | 0.14 | 0.32          | 0.00 | $\text{sd}(\mu)/\sigma = 1$<br>$\rho = 0$<br>$\bar{s}_{Oracle} = 38.0$    |
| CV.min | 0.45  | 0.04 | 0.16            | 0.00 | 0.10             | 0.00 | 0.92        | 0.19 | 0.60          | 0.03 |                                                                           |
| AICc   | 0.55  | 0.03 | 0.93            | 0.10 | 0.94             | 0.09 | 0.86        | 0.07 |               |      |                                                                           |
| AIC    | 0.93  | 0.23 | 0.94            | 0.15 | 0.95             | 0.10 | 0.92        | 0.21 |               |      |                                                                           |
| BIC    | 0.93  | 0.23 | 0.94            | 0.14 | 0.95             | 0.10 | 0.92        | 0.21 |               |      |                                                                           |
| CV.1se | 0.04  | 0.00 | 0.02            | 0.00 | 0.02             | 0.00 | 0.90        | 0.13 | 0.33          | 0.00 | $\text{sd}(\mu)/\sigma = 1$<br>$\rho = 0.5$<br>$\bar{s}_{Oracle} = 36.9$  |
| CV.min | 0.42  | 0.03 | 0.18            | 0.00 | 0.08             | 0.00 | 0.92        | 0.19 | 0.59          | 0.03 |                                                                           |
| AICc   | 0.52  | 0.02 | 0.93            | 0.10 | 0.95             | 0.09 | 0.88        | 0.07 |               |      |                                                                           |
| AIC    | 0.93  | 0.23 | 0.94            | 0.15 | 0.95             | 0.10 | 0.93        | 0.20 |               |      |                                                                           |
| BIC    | 0.93  | 0.23 | 0.94            | 0.15 | 0.95             | 0.10 | 0.93        | 0.20 |               |      |                                                                           |
| CV.1se | 0.03  | 0.00 | 0.01            | 0.00 | 0.02             | 0.00 | 0.90        | 0.13 | 0.29          | 0.01 | $\text{sd}(\mu)/\sigma = 1$<br>$\rho = 0.9$<br>$\bar{s}_{Oracle} = 37.1$  |
| CV.min | 0.45  | 0.03 | 0.19            | 0.00 | 0.10             | 0.00 | 0.92        | 0.18 | 0.58          | 0.03 |                                                                           |
| AICc   | 0.56  | 0.02 | 0.93            | 0.10 | 0.95             | 0.09 | 0.87        | 0.07 |               |      |                                                                           |
| AIC    | 0.93  | 0.23 | 0.94            | 0.15 | 0.95             | 0.10 | 0.93        | 0.20 |               |      |                                                                           |
| BIC    | 0.93  | 0.23 | 0.94            | 0.15 | 0.95             | 0.10 | 0.93        | 0.20 |               |      |                                                                           |
| CV.1se | 0.02  | 0.00 | 0.01            | 0.00 | 0.02             | 0.00 | 0.97        | 0.15 | 0.34          | 0.00 | $\text{sd}(\mu)/\sigma = 0.5$<br>$\rho = 0$<br>$\bar{s}_{Oracle} = 6.6$   |
| CV.min | 0.41  | 0.03 | 0.15            | 0.00 | 0.09             | 0.00 | 0.98        | 0.21 | 0.62          | 0.03 |                                                                           |
| AICc   | 0.57  | 0.02 | 0.99            | 0.10 | 0.99             | 0.09 | 0.96        | 0.07 |               |      |                                                                           |
| AIC    | 0.99  | 0.26 | 0.99            | 0.14 | 0.99             | 0.10 | 0.98        | 0.23 |               |      |                                                                           |
| BIC    | 0.99  | 0.26 | 0.99            | 0.14 | 0.99             | 0.10 | 0.98        | 0.23 |               |      |                                                                           |
| CV.1se | 0.02  | 0.00 | 0.01            | 0.00 | 0.01             | 0.00 | 0.97        | 0.15 | 0.35          | 0.01 | $\text{sd}(\mu)/\sigma = 0.5$<br>$\rho = 0.5$<br>$\bar{s}_{Oracle} = 6.9$ |
| CV.min | 0.43  | 0.02 | 0.15            | 0.00 | 0.09             | 0.00 | 0.98        | 0.20 | 0.61          | 0.02 |                                                                           |
| AICc   | 0.58  | 0.03 | 0.99            | 0.10 | 0.99             | 0.09 | 0.95        | 0.09 |               |      |                                                                           |
| AIC    | 0.99  | 0.24 | 0.99            | 0.14 | 0.99             | 0.10 | 0.98        | 0.22 |               |      |                                                                           |
| BIC    | 0.99  | 0.24 | 0.99            | 0.14 | 0.99             | 0.10 | 0.98        | 0.22 |               |      |                                                                           |
| CV.1se | 0.03  | 0.00 | 0.01            | 0.00 | 0.02             | 0.00 | 0.97        | 0.14 | 0.34          | 0.00 | $\text{sd}(\mu)/\sigma = 0.5$<br>$\rho = 0.9$<br>$\bar{s}_{Oracle} = 6.4$ |
| CV.min | 0.43  | 0.03 | 0.16            | 0.00 | 0.09             | 0.00 | 0.98        | 0.20 | 0.63          | 0.03 |                                                                           |
| AICc   | 0.60  | 0.03 | 0.99            | 0.11 | 0.99             | 0.10 | 0.96        | 0.08 |               |      |                                                                           |
| AIC    | 0.99  | 0.25 | 0.99            | 0.15 | 0.99             | 0.11 | 0.98        | 0.23 |               |      |                                                                           |
| BIC    | 0.99  | 0.25 | 0.99            | 0.15 | 0.99             | 0.11 | 0.98        | 0.23 |               |      |                                                                           |

Table 119: **FDR | Sensitivity for n=100, binary design, dense covariates, and decay 200.**

|        | lasso |      | GL $\gamma = 1$ |      | GL $\gamma = 10$ |      | marginal AL |      | sparsenet MCP |      |                                                                           |
|--------|-------|------|-----------------|------|------------------|------|-------------|------|---------------|------|---------------------------------------------------------------------------|
| CV.1se | 0.05  | 0.00 | 0.01            | 0.00 | 0.02             | 0.00 | 0.83        | 0.10 | 0.27          | 0.00 | $\text{sd}(\mu)/\sigma = 2$<br>$\rho = 0$<br>$\bar{s}_{Oracle} = 91.2$    |
| CV.min | 0.43  | 0.03 | 0.16            | 0.00 | 0.09             | 0.00 | 0.85        | 0.14 | 0.57          | 0.03 |                                                                           |
| AICc   | 0.50  | 0.02 | 0.86            | 0.07 | 0.88             | 0.07 | 0.79        | 0.05 |               |      |                                                                           |
| AIC    | 0.86  | 0.18 | 0.88            | 0.12 | 0.89             | 0.08 | 0.85        | 0.16 |               |      |                                                                           |
| BIC    | 0.86  | 0.18 | 0.88            | 0.12 | 0.89             | 0.08 | 0.85        | 0.15 |               |      |                                                                           |
| CV.1se | 0.03  | 0.00 | 0.02            | 0.00 | 0.02             | 0.00 | 0.83        | 0.09 | 0.26          | 0.00 | $\text{sd}(\mu)/\sigma = 2$<br>$\rho = 0.5$<br>$\bar{s}_{Oracle} = 90.8$  |
| CV.min | 0.42  | 0.02 | 0.16            | 0.00 | 0.10             | 0.00 | 0.85        | 0.14 | 0.55          | 0.02 |                                                                           |
| AICc   | 0.50  | 0.01 | 0.87            | 0.07 | 0.89             | 0.07 | 0.79        | 0.05 |               |      |                                                                           |
| AIC    | 0.86  | 0.18 | 0.88            | 0.12 | 0.89             | 0.08 | 0.86        | 0.15 |               |      |                                                                           |
| BIC    | 0.86  | 0.18 | 0.88            | 0.12 | 0.89             | 0.08 | 0.86        | 0.15 |               |      |                                                                           |
| CV.1se | 0.04  | 0.00 | 0.02            | 0.00 | 0.02             | 0.00 | 0.83        | 0.09 | 0.29          | 0.00 | $\text{sd}(\mu)/\sigma = 2$<br>$\rho = 0.9$<br>$\bar{s}_{Oracle} = 90.3$  |
| CV.min | 0.44  | 0.02 | 0.18            | 0.00 | 0.11             | 0.00 | 0.85        | 0.13 | 0.58          | 0.02 |                                                                           |
| AICc   | 0.53  | 0.01 | 0.87            | 0.07 | 0.89             | 0.07 | 0.81        | 0.04 |               |      |                                                                           |
| AIC    | 0.86  | 0.17 | 0.88            | 0.12 | 0.89             | 0.08 | 0.86        | 0.15 |               |      |                                                                           |
| BIC    | 0.86  | 0.17 | 0.88            | 0.11 | 0.89             | 0.08 | 0.86        | 0.15 |               |      |                                                                           |
| CV.1se | 0.03  | 0.00 | 0.01            | 0.00 | 0.01             | 0.00 | 0.91        | 0.11 | 0.34          | 0.00 | $\text{sd}(\mu)/\sigma = 1$<br>$\rho = 0$<br>$\bar{s}_{Oracle} = 41.6$    |
| CV.min | 0.44  | 0.03 | 0.15            | 0.00 | 0.10             | 0.00 | 0.93        | 0.16 | 0.64          | 0.03 |                                                                           |
| AICc   | 0.55  | 0.02 | 0.94            | 0.08 | 0.95             | 0.08 | 0.90        | 0.06 |               |      |                                                                           |
| AIC    | 0.94  | 0.20 | 0.94            | 0.12 | 0.95             | 0.08 | 0.93        | 0.17 |               |      |                                                                           |
| BIC    | 0.94  | 0.20 | 0.95            | 0.12 | 0.95             | 0.08 | 0.93        | 0.17 |               |      |                                                                           |
| CV.1se | 0.03  | 0.00 | 0.02            | 0.00 | 0.02             | 0.00 | 0.92        | 0.11 | 0.32          | 0.00 | $\text{sd}(\mu)/\sigma = 1$<br>$\rho = 0.5$<br>$\bar{s}_{Oracle} = 41.3$  |
| CV.min | 0.45  | 0.02 | 0.17            | 0.00 | 0.09             | 0.00 | 0.93        | 0.16 | 0.62          | 0.02 |                                                                           |
| AICc   | 0.56  | 0.02 | 0.94            | 0.08 | 0.95             | 0.08 | 0.90        | 0.05 |               |      |                                                                           |
| AIC    | 0.94  | 0.20 | 0.94            | 0.12 | 0.95             | 0.09 | 0.94        | 0.17 |               |      |                                                                           |
| BIC    | 0.94  | 0.19 | 0.94            | 0.12 | 0.95             | 0.09 | 0.94        | 0.17 |               |      |                                                                           |
| CV.1se | 0.04  | 0.00 | 0.01            | 0.00 | 0.01             | 0.00 | 0.92        | 0.11 | 0.33          | 0.00 | $\text{sd}(\mu)/\sigma = 1$<br>$\rho = 0.9$<br>$\bar{s}_{Oracle} = 40.7$  |
| CV.min | 0.46  | 0.02 | 0.19            | 0.00 | 0.11             | 0.00 | 0.93        | 0.15 | 0.62          | 0.02 |                                                                           |
| AICc   | 0.56  | 0.02 | 0.94            | 0.08 | 0.95             | 0.08 | 0.90        | 0.06 |               |      |                                                                           |
| AIC    | 0.94  | 0.20 | 0.95            | 0.13 | 0.95             | 0.09 | 0.94        | 0.17 |               |      |                                                                           |
| BIC    | 0.94  | 0.20 | 0.95            | 0.12 | 0.95             | 0.09 | 0.94        | 0.17 |               |      |                                                                           |
| CV.1se | 0.03  | 0.00 | 0.01            | 0.00 | 0.01             | 0.00 | 0.98        | 0.11 | 0.35          | 0.00 | $\text{sd}(\mu)/\sigma = 0.5$<br>$\rho = 0$<br>$\bar{s}_{Oracle} = 5.1$   |
| CV.min | 0.42  | 0.02 | 0.14            | 0.00 | 0.09             | 0.00 | 0.99        | 0.18 | 0.62          | 0.02 |                                                                           |
| AICc   | 0.57  | 0.02 | 0.99            | 0.08 | 0.99             | 0.08 | 0.97        | 0.06 |               |      |                                                                           |
| AIC    | 0.99  | 0.24 | 0.99            | 0.11 | 0.99             | 0.08 | 0.99        | 0.20 |               |      |                                                                           |
| BIC    | 0.99  | 0.24 | 0.99            | 0.10 | 0.99             | 0.08 | 0.99        | 0.20 |               |      |                                                                           |
| CV.1se | 0.03  | 0.00 | 0.01            | 0.00 | 0.01             | 0.00 | 0.98        | 0.13 | 0.36          | 0.00 | $\text{sd}(\mu)/\sigma = 0.5$<br>$\rho = 0.5$<br>$\bar{s}_{Oracle} = 5.6$ |
| CV.min | 0.44  | 0.02 | 0.14            | 0.00 | 0.08             | 0.00 | 0.99        | 0.18 | 0.64          | 0.02 |                                                                           |
| AICc   | 0.57  | 0.03 | 0.99            | 0.09 | 0.99             | 0.09 | 0.97        | 0.07 |               |      |                                                                           |
| AIC    | 0.99  | 0.21 | 0.99            | 0.12 | 0.99             | 0.09 | 0.99        | 0.20 |               |      |                                                                           |
| BIC    | 0.99  | 0.21 | 0.99            | 0.12 | 0.99             | 0.09 | 0.99        | 0.20 |               |      |                                                                           |
| CV.1se | 0.02  | 0.00 | 0.01            | 0.00 | 0.01             | 0.00 | 0.97        | 0.13 | 0.35          | 0.01 | $\text{sd}(\mu)/\sigma = 0.5$<br>$\rho = 0.9$<br>$\bar{s}_{Oracle} = 5.2$ |
| CV.min | 0.44  | 0.02 | 0.17            | 0.01 | 0.09             | 0.00 | 0.99        | 0.19 | 0.65          | 0.03 |                                                                           |
| AICc   | 0.58  | 0.03 | 0.99            | 0.10 | 0.99             | 0.09 | 0.97        | 0.07 |               |      |                                                                           |
| AIC    | 0.99  | 0.23 | 0.99            | 0.13 | 0.99             | 0.10 | 0.99        | 0.21 |               |      |                                                                           |
| BIC    | 0.99  | 0.23 | 0.99            | 0.12 | 0.99             | 0.10 | 0.99        | 0.21 |               |      |                                                                           |

Table 120: **FDR | Sensitivity for n=100, continuous design, dense covariates, and decay 10.**

|        | lasso |      | GL $\gamma = 1$ |      | GL $\gamma = 10$ |      | marginal AL |      | sparsenet MCP |      |                                                                           |
|--------|-------|------|-----------------|------|------------------|------|-------------|------|---------------|------|---------------------------------------------------------------------------|
| CV.lse | 0.29  | 0.23 | 0.17            | 0.19 | 0.03             | 0.10 | 0.73        | 0.45 | 0.17          | 0.20 | $\text{sd}(\mu)/\sigma = 2$<br>$\rho = 0$<br>$\bar{s}_{Oracle} = 20.7$    |
| CV.min | 0.72  | 0.46 | 0.54            | 0.38 | 0.15             | 0.19 | 0.84        | 0.52 | 0.52          | 0.39 |                                                                           |
| AICc   | 0.58  | 0.37 | 0.24            | 0.25 | 0.80             | 0.41 | 0.67        | 0.40 |               |      |                                                                           |
| AIC    | 0.89  | 0.59 | 0.88            | 0.56 | 0.88             | 0.44 | 0.87        | 0.54 |               |      |                                                                           |
| BIC    | 0.89  | 0.59 | 0.88            | 0.56 | 0.88             | 0.44 | 0.84        | 0.53 |               |      |                                                                           |
| CV.lse | 0.08  | 0.03 | 0.07            | 0.03 | 0.02             | 0.03 | 0.85        | 0.19 | 0.10          | 0.06 | $\text{sd}(\mu)/\sigma = 2$<br>$\rho = 0.5$<br>$\bar{s}_{Oracle} = 20.4$  |
| CV.min | 0.62  | 0.12 | 0.51            | 0.10 | 0.14             | 0.06 | 0.92        | 0.25 | 0.39          | 0.12 |                                                                           |
| AICc   | 0.63  | 0.11 | 0.17            | 0.06 | 0.70             | 0.18 | 0.84        | 0.15 |               |      |                                                                           |
| AIC    | 0.94  | 0.34 | 0.94            | 0.32 | 0.94             | 0.25 | 0.94        | 0.28 |               |      |                                                                           |
| BIC    | 0.94  | 0.33 | 0.94            | 0.32 | 0.94             | 0.25 | 0.86        | 0.26 |               |      |                                                                           |
| CV.lse | 0.06  | 0.06 | 0.04            | 0.06 | 0.01             | 0.06 | 0.54        | 0.16 | 0.01          | 0.06 | $\text{sd}(\mu)/\sigma = 2$<br>$\rho = 0.9$<br>$\bar{s}_{Oracle} = 18.3$  |
| CV.min | 0.63  | 0.08 | 0.51            | 0.07 | 0.14             | 0.06 | 0.81        | 0.32 | 0.23          | 0.06 |                                                                           |
| AICc   | 0.65  | 0.08 | 0.14            | 0.06 | 0.00             | 0.06 | 0.76        | 0.22 |               |      |                                                                           |
| AIC    | 0.97  | 0.19 | 0.97            | 0.17 | 0.97             | 0.14 | 0.86        | 0.44 |               |      |                                                                           |
| BIC    | 0.84  | 0.16 | 0.87            | 0.16 | 0.97             | 0.14 | 0.26        | 0.09 |               |      |                                                                           |
| CV.lse | 0.09  | 0.05 | 0.05            | 0.04 | 0.02             | 0.02 | 0.84        | 0.42 | 0.12          | 0.05 | $\text{sd}(\mu)/\sigma = 1$<br>$\rho = 0$<br>$\bar{s}_{Oracle} = 14.4$    |
| CV.min | 0.54  | 0.24 | 0.33            | 0.14 | 0.10             | 0.06 | 0.91        | 0.50 | 0.50          | 0.23 |                                                                           |
| AICc   | 0.57  | 0.23 | 0.11            | 0.07 | 0.93             | 0.28 | 0.78        | 0.34 |               |      |                                                                           |
| AIC    | 0.93  | 0.55 | 0.94            | 0.46 | 0.94             | 0.31 | 0.93        | 0.51 |               |      |                                                                           |
| BIC    | 0.93  | 0.54 | 0.94            | 0.46 | 0.94             | 0.30 | 0.92        | 0.51 |               |      |                                                                           |
| CV.lse | 0.04  | 0.01 | 0.03            | 0.01 | 0.02             | 0.01 | 0.89        | 0.19 | 0.15          | 0.03 | $\text{sd}(\mu)/\sigma = 1$<br>$\rho = 0.5$<br>$\bar{s}_{Oracle} = 14.2$  |
| CV.min | 0.50  | 0.09 | 0.37            | 0.06 | 0.13             | 0.03 | 0.95        | 0.26 | 0.47          | 0.08 |                                                                           |
| AICc   | 0.59  | 0.09 | 0.10            | 0.03 | 0.94             | 0.17 | 0.87        | 0.14 |               |      |                                                                           |
| AIC    | 0.96  | 0.32 | 0.96            | 0.28 | 0.97             | 0.20 | 0.96        | 0.28 |               |      |                                                                           |
| BIC    | 0.96  | 0.32 | 0.96            | 0.28 | 0.97             | 0.20 | 0.95        | 0.28 |               |      |                                                                           |
| CV.lse | 0.06  | 0.08 | 0.04            | 0.08 | 0.01             | 0.09 | 0.44        | 0.14 | 0.01          | 0.09 | $\text{sd}(\mu)/\sigma = 1$<br>$\rho = 0.9$<br>$\bar{s}_{Oracle} = 11.6$  |
| CV.min | 0.64  | 0.14 | 0.51            | 0.11 | 0.14             | 0.10 | 0.86        | 0.24 | 0.22          | 0.11 |                                                                           |
| AICc   | 0.65  | 0.13 | 0.13            | 0.10 | 0.02             | 0.10 | 0.80        | 0.17 |               |      |                                                                           |
| AIC    | 0.98  | 0.23 | 0.98            | 0.20 | 0.98             | 0.17 | 0.93        | 0.49 |               |      |                                                                           |
| BIC    | 0.97  | 0.22 | 0.98            | 0.20 | 0.98             | 0.16 | 0.31        | 0.13 |               |      |                                                                           |
| CV.lse | 0.03  | 0.01 | 0.02            | 0.01 | 0.01             | 0.00 | 0.93        | 0.35 | 0.27          | 0.02 | $\text{sd}(\mu)/\sigma = 0.5$<br>$\rho = 0$<br>$\bar{s}_{Oracle} = 7.9$   |
| CV.min | 0.41  | 0.10 | 0.20            | 0.04 | 0.10             | 0.02 | 0.96        | 0.43 | 0.55          | 0.10 |                                                                           |
| AICc   | 0.53  | 0.11 | 0.24            | 0.06 | 0.98             | 0.20 | 0.90        | 0.25 |               |      |                                                                           |
| AIC    | 0.97  | 0.47 | 0.98            | 0.34 | 0.98             | 0.22 | 0.97        | 0.45 |               |      |                                                                           |
| BIC    | 0.97  | 0.46 | 0.98            | 0.34 | 0.98             | 0.21 | 0.97        | 0.45 |               |      |                                                                           |
| CV.lse | 0.02  | 0.00 | 0.02            | 0.00 | 0.01             | 0.00 | 0.94        | 0.20 | 0.31          | 0.01 | $\text{sd}(\mu)/\sigma = 0.5$<br>$\rho = 0.5$<br>$\bar{s}_{Oracle} = 7.6$ |
| CV.min | 0.42  | 0.06 | 0.26            | 0.03 | 0.13             | 0.01 | 0.98        | 0.27 | 0.60          | 0.06 |                                                                           |
| AICc   | 0.57  | 0.07 | 0.07            | 0.01 | 0.98             | 0.15 | 0.93        | 0.15 |               |      |                                                                           |
| AIC    | 0.98  | 0.32 | 0.98            | 0.26 | 0.99             | 0.17 | 0.98        | 0.30 |               |      |                                                                           |
| BIC    | 0.98  | 0.31 | 0.98            | 0.25 | 0.99             | 0.17 | 0.98        | 0.30 |               |      |                                                                           |
| CV.lse | 0.03  | 0.04 | 0.03            | 0.04 | 0.01             | 0.05 | 0.57        | 0.27 | 0.15          | 0.11 | $\text{sd}(\mu)/\sigma = 0.5$<br>$\rho = 0.9$<br>$\bar{s}_{Oracle} = 5.5$ |
| CV.min | 0.51  | 0.25 | 0.40            | 0.21 | 0.15             | 0.14 | 0.92        | 0.37 | 0.48          | 0.24 |                                                                           |
| AICc   | 0.63  | 0.28 | 0.10            | 0.13 | 0.66             | 0.24 | 0.88        | 0.34 |               |      |                                                                           |
| AIC    | 0.99  | 0.38 | 0.99            | 0.35 | 0.99             | 0.31 | 0.98        | 0.49 |               |      |                                                                           |
| BIC    | 0.99  | 0.38 | 0.99            | 0.35 | 0.99             | 0.31 | 0.62        | 0.33 |               |      |                                                                           |



Table 121: **FDR | Sensitivity for n=100, continuous design, dense covariates, and decay 50.**

|        | lasso |      | GL $\gamma = 1$ |      | GL $\gamma = 10$ |      | marginal AL |      | sparsenet MCP |      |                                                                           |
|--------|-------|------|-----------------|------|------------------|------|-------------|------|---------------|------|---------------------------------------------------------------------------|
| CV.1se | 0.06  | 0.01 | 0.03            | 0.00 | 0.01             | 0.00 | 0.78        | 0.19 | 0.18          | 0.01 | $\text{sd}(\mu)/\sigma = 2$<br>$\rho = 0$<br>$\bar{s}_{Oracle} = 57.2$    |
| CV.min | 0.47  | 0.08 | 0.20            | 0.01 | 0.09             | 0.00 | 0.83        | 0.25 | 0.51          | 0.07 |                                                                           |
| AICc   | 0.47  | 0.05 | 0.36            | 0.05 | 0.89             | 0.11 | 0.72        | 0.12 |               |      |                                                                           |
| AIC    | 0.86  | 0.29 | 0.88            | 0.21 | 0.90             | 0.13 | 0.84        | 0.26 |               |      |                                                                           |
| BIC    | 0.86  | 0.29 | 0.88            | 0.20 | 0.90             | 0.12 | 0.84        | 0.26 |               |      |                                                                           |
| CV.1se | 0.03  | 0.00 | 0.03            | 0.00 | 0.01             | 0.00 | 0.86        | 0.09 | 0.25          | 0.00 | $\text{sd}(\mu)/\sigma = 2$<br>$\rho = 0.5$<br>$\bar{s}_{Oracle} = 57.0$  |
| CV.min | 0.40  | 0.02 | 0.24            | 0.01 | 0.09             | 0.00 | 0.90        | 0.13 | 0.52          | 0.02 |                                                                           |
| AICc   | 0.52  | 0.02 | 0.08            | 0.00 | 0.92             | 0.08 | 0.85        | 0.05 |               |      |                                                                           |
| AIC    | 0.91  | 0.18 | 0.92            | 0.15 | 0.93             | 0.10 | 0.91        | 0.16 |               |      |                                                                           |
| BIC    | 0.91  | 0.18 | 0.92            | 0.15 | 0.93             | 0.10 | 0.91        | 0.16 |               |      |                                                                           |
| CV.1se | 0.04  | 0.00 | 0.04            | 0.01 | 0.02             | 0.01 | 0.51        | 0.03 | 0.08          | 0.01 | $\text{sd}(\mu)/\sigma = 2$<br>$\rho = 0.9$<br>$\bar{s}_{Oracle} = 55.0$  |
| CV.min | 0.54  | 0.03 | 0.44            | 0.02 | 0.18             | 0.01 | 0.85        | 0.06 | 0.41          | 0.02 |                                                                           |
| AICc   | 0.62  | 0.03 | 0.10            | 0.01 | 0.43             | 0.04 | 0.81        | 0.04 |               |      |                                                                           |
| AIC    | 0.93  | 0.14 | 0.93            | 0.12 | 0.93             | 0.10 | 0.91        | 0.15 |               |      |                                                                           |
| BIC    | 0.93  | 0.14 | 0.93            | 0.12 | 0.93             | 0.09 | 0.50        | 0.05 |               |      |                                                                           |
| CV.1se | 0.04  | 0.00 | 0.02            | 0.00 | 0.01             | 0.00 | 0.88        | 0.19 | 0.25          | 0.01 | $\text{sd}(\mu)/\sigma = 1$<br>$\rho = 0$<br>$\bar{s}_{Oracle} = 30.6$    |
| CV.min | 0.44  | 0.05 | 0.18            | 0.01 | 0.10             | 0.00 | 0.91        | 0.25 | 0.55          | 0.05 |                                                                           |
| AICc   | 0.54  | 0.05 | 0.60            | 0.08 | 0.94             | 0.12 | 0.84        | 0.12 |               |      |                                                                           |
| AIC    | 0.93  | 0.30 | 0.94            | 0.20 | 0.95             | 0.13 | 0.92        | 0.27 |               |      |                                                                           |
| BIC    | 0.93  | 0.30 | 0.94            | 0.20 | 0.95             | 0.13 | 0.92        | 0.27 |               |      |                                                                           |
| CV.1se | 0.03  | 0.00 | 0.02            | 0.00 | 0.01             | 0.00 | 0.91        | 0.09 | 0.30          | 0.00 | $\text{sd}(\mu)/\sigma = 1$<br>$\rho = 0.5$<br>$\bar{s}_{Oracle} = 30.4$  |
| CV.min | 0.36  | 0.02 | 0.23            | 0.01 | 0.11             | 0.00 | 0.94        | 0.15 | 0.56          | 0.02 |                                                                           |
| AICc   | 0.52  | 0.02 | 0.14            | 0.01 | 0.96             | 0.08 | 0.91        | 0.06 |               |      |                                                                           |
| AIC    | 0.95  | 0.20 | 0.95            | 0.15 | 0.96             | 0.10 | 0.95        | 0.17 |               |      |                                                                           |
| BIC    | 0.95  | 0.19 | 0.95            | 0.15 | 0.96             | 0.10 | 0.95        | 0.17 |               |      |                                                                           |
| CV.1se | 0.03  | 0.01 | 0.03            | 0.01 | 0.02             | 0.00 | 0.54        | 0.04 | 0.17          | 0.01 | $\text{sd}(\mu)/\sigma = 1$<br>$\rho = 0.9$<br>$\bar{s}_{Oracle} = 27.7$  |
| CV.min | 0.46  | 0.04 | 0.35            | 0.03 | 0.15             | 0.01 | 0.89        | 0.09 | 0.50          | 0.03 |                                                                           |
| AICc   | 0.57  | 0.04 | 0.09            | 0.01 | 0.83             | 0.08 | 0.85        | 0.07 |               |      |                                                                           |
| AIC    | 0.96  | 0.16 | 0.96            | 0.14 | 0.96             | 0.11 | 0.95        | 0.20 |               |      |                                                                           |
| BIC    | 0.96  | 0.16 | 0.96            | 0.14 | 0.96             | 0.11 | 0.66        | 0.10 |               |      |                                                                           |
| CV.1se | 0.03  | 0.00 | 0.02            | 0.00 | 0.02             | 0.00 | 0.96        | 0.19 | 0.30          | 0.00 | $\text{sd}(\mu)/\sigma = 0.5$<br>$\rho = 0$<br>$\bar{s}_{Oracle} = 8.7$   |
| CV.min | 0.43  | 0.04 | 0.17            | 0.00 | 0.10             | 0.00 | 0.98        | 0.24 | 0.60          | 0.03 |                                                                           |
| AICc   | 0.59  | 0.03 | 0.93            | 0.12 | 0.98             | 0.11 | 0.95        | 0.11 |               |      |                                                                           |
| AIC    | 0.98  | 0.29 | 0.98            | 0.18 | 0.99             | 0.11 | 0.98        | 0.26 |               |      |                                                                           |
| BIC    | 0.98  | 0.29 | 0.98            | 0.18 | 0.99             | 0.11 | 0.98        | 0.26 |               |      |                                                                           |
| CV.1se | 0.02  | 0.00 | 0.01            | 0.00 | 0.01             | 0.00 | 0.95        | 0.12 | 0.32          | 0.00 | $\text{sd}(\mu)/\sigma = 0.5$<br>$\rho = 0.5$<br>$\bar{s}_{Oracle} = 8.5$ |
| CV.min | 0.40  | 0.02 | 0.19            | 0.00 | 0.11             | 0.00 | 0.98        | 0.17 | 0.59          | 0.02 |                                                                           |
| AICc   | 0.59  | 0.03 | 0.50            | 0.05 | 0.99             | 0.10 | 0.96        | 0.08 |               |      |                                                                           |
| AIC    | 0.98  | 0.23 | 0.99            | 0.16 | 0.99             | 0.11 | 0.98        | 0.20 |               |      |                                                                           |
| BIC    | 0.98  | 0.23 | 0.99            | 0.16 | 0.99             | 0.11 | 0.98        | 0.20 |               |      |                                                                           |
| CV.1se | 0.01  | 0.00 | 0.02            | 0.00 | 0.01             | 0.00 | 0.58        | 0.10 | 0.31          | 0.01 | $\text{sd}(\mu)/\sigma = 0.5$<br>$\rho = 0.9$<br>$\bar{s}_{Oracle} = 7.3$ |
| CV.min | 0.42  | 0.07 | 0.27            | 0.04 | 0.12             | 0.01 | 0.94        | 0.20 | 0.60          | 0.07 |                                                                           |
| AICc   | 0.57  | 0.08 | 0.07            | 0.01 | 0.98             | 0.18 | 0.92        | 0.16 |               |      |                                                                           |
| AIC    | 0.99  | 0.28 | 0.99            | 0.23 | 0.99             | 0.20 | 0.98        | 0.30 |               |      |                                                                           |
| BIC    | 0.99  | 0.28 | 0.99            | 0.23 | 0.99             | 0.20 | 0.84        | 0.21 |               |      |                                                                           |

Table 122: **FDR | Sensitivity for n=100, continuous design, dense covariates, and decay 100.**

|        | lasso |      | GL $\gamma = 1$ |      | GL $\gamma = 10$ |      | marginal AL |      | sparsenet MCP |      |                                                                           |
|--------|-------|------|-----------------|------|------------------|------|-------------|------|---------------|------|---------------------------------------------------------------------------|
| CV.1se | 0.04  | 0.00 | 0.01            | 0.00 | 0.01             | 0.00 | 0.80        | 0.13 | 0.22          | 0.00 | $\text{sd}(\mu)/\sigma = 2$<br>$\rho = 0$<br>$\bar{s}_{Oracle} = 77.5$    |
| CV.min | 0.43  | 0.04 | 0.15            | 0.00 | 0.08             | 0.00 | 0.83        | 0.18 | 0.51          | 0.04 |                                                                           |
| AICc   | 0.48  | 0.03 | 0.67            | 0.07 | 0.88             | 0.09 | 0.74        | 0.07 |               |      |                                                                           |
| AIC    | 0.85  | 0.23 | 0.87            | 0.15 | 0.89             | 0.10 | 0.84        | 0.20 |               |      |                                                                           |
| BIC    | 0.85  | 0.22 | 0.87            | 0.15 | 0.89             | 0.10 | 0.84        | 0.20 |               |      |                                                                           |
| CV.1se | 0.02  | 0.00 | 0.01            | 0.00 | 0.01             | 0.00 | 0.86        | 0.07 | 0.26          | 0.00 | $\text{sd}(\mu)/\sigma = 2$<br>$\rho = 0.5$<br>$\bar{s}_{Oracle} = 77.5$  |
| CV.min | 0.39  | 0.01 | 0.20            | 0.00 | 0.09             | 0.00 | 0.89        | 0.11 | 0.54          | 0.01 |                                                                           |
| AICc   | 0.51  | 0.01 | 0.17            | 0.01 | 0.91             | 0.07 | 0.85        | 0.04 |               |      |                                                                           |
| AIC    | 0.90  | 0.16 | 0.90            | 0.12 | 0.91             | 0.09 | 0.90        | 0.13 |               |      |                                                                           |
| BIC    | 0.90  | 0.15 | 0.90            | 0.12 | 0.91             | 0.09 | 0.89        | 0.13 |               |      |                                                                           |
| CV.1se | 0.03  | 0.00 | 0.03            | 0.00 | 0.02             | 0.00 | 0.55        | 0.02 | 0.18          | 0.00 | $\text{sd}(\mu)/\sigma = 2$<br>$\rho = 0.9$<br>$\bar{s}_{Oracle} = 76.0$  |
| CV.min | 0.45  | 0.01 | 0.32            | 0.01 | 0.15             | 0.00 | 0.85        | 0.04 | 0.47          | 0.01 |                                                                           |
| AICc   | 0.56  | 0.01 | 0.09            | 0.00 | 0.84             | 0.06 | 0.82        | 0.03 |               |      |                                                                           |
| AIC    | 0.91  | 0.13 | 0.92            | 0.11 | 0.92             | 0.09 | 0.90        | 0.12 |               |      |                                                                           |
| BIC    | 0.91  | 0.13 | 0.92            | 0.11 | 0.92             | 0.09 | 0.67        | 0.06 |               |      |                                                                           |
| CV.1se | 0.04  | 0.00 | 0.02            | 0.00 | 0.01             | 0.00 | 0.90        | 0.14 | 0.26          | 0.00 | $\text{sd}(\mu)/\sigma = 1$<br>$\rho = 0$<br>$\bar{s}_{Oracle} = 37.7$    |
| CV.min | 0.43  | 0.03 | 0.17            | 0.00 | 0.09             | 0.00 | 0.92        | 0.19 | 0.57          | 0.03 |                                                                           |
| AICc   | 0.54  | 0.03 | 0.86            | 0.09 | 0.95             | 0.09 | 0.87        | 0.07 |               |      |                                                                           |
| AIC    | 0.93  | 0.24 | 0.94            | 0.15 | 0.95             | 0.10 | 0.93        | 0.21 |               |      |                                                                           |
| BIC    | 0.93  | 0.23 | 0.94            | 0.15 | 0.95             | 0.10 | 0.92        | 0.21 |               |      |                                                                           |
| CV.1se | 0.03  | 0.00 | 0.02            | 0.00 | 0.01             | 0.00 | 0.92        | 0.08 | 0.32          | 0.00 | $\text{sd}(\mu)/\sigma = 1$<br>$\rho = 0.5$<br>$\bar{s}_{Oracle} = 37.2$  |
| CV.min | 0.39  | 0.01 | 0.21            | 0.00 | 0.10             | 0.00 | 0.94        | 0.12 | 0.57          | 0.01 |                                                                           |
| AICc   | 0.53  | 0.01 | 0.38            | 0.03 | 0.96             | 0.07 | 0.92        | 0.04 |               |      |                                                                           |
| AIC    | 0.95  | 0.17 | 0.95            | 0.13 | 0.96             | 0.09 | 0.95        | 0.15 |               |      |                                                                           |
| BIC    | 0.95  | 0.17 | 0.95            | 0.12 | 0.96             | 0.08 | 0.95        | 0.15 |               |      |                                                                           |
| CV.1se | 0.02  | 0.00 | 0.02            | 0.00 | 0.01             | 0.00 | 0.55        | 0.03 | 0.26          | 0.00 | $\text{sd}(\mu)/\sigma = 1$<br>$\rho = 0.9$<br>$\bar{s}_{Oracle} = 34.6$  |
| CV.min | 0.40  | 0.02 | 0.28            | 0.01 | 0.13             | 0.00 | 0.92        | 0.07 | 0.54          | 0.02 |                                                                           |
| AICc   | 0.53  | 0.02 | 0.07            | 0.00 | 0.95             | 0.08 | 0.88        | 0.04 |               |      |                                                                           |
| AIC    | 0.96  | 0.15 | 0.96            | 0.12 | 0.96             | 0.10 | 0.95        | 0.16 |               |      |                                                                           |
| BIC    | 0.96  | 0.15 | 0.96            | 0.12 | 0.96             | 0.10 | 0.74        | 0.09 |               |      |                                                                           |
| CV.1se | 0.03  | 0.00 | 0.02            | 0.00 | 0.02             | 0.00 | 0.97        | 0.15 | 0.34          | 0.00 | $\text{sd}(\mu)/\sigma = 0.5$<br>$\rho = 0$<br>$\bar{s}_{Oracle} = 6.8$   |
| CV.min | 0.45  | 0.03 | 0.16            | 0.00 | 0.10             | 0.00 | 0.98        | 0.20 | 0.63          | 0.02 |                                                                           |
| AICc   | 0.59  | 0.03 | 0.98            | 0.10 | 0.99             | 0.10 | 0.96        | 0.08 |               |      |                                                                           |
| AIC    | 0.99  | 0.25 | 0.99            | 0.14 | 0.99             | 0.10 | 0.98        | 0.22 |               |      |                                                                           |
| BIC    | 0.98  | 0.25 | 0.99            | 0.14 | 0.99             | 0.10 | 0.98        | 0.22 |               |      |                                                                           |
| CV.1se | 0.03  | 0.00 | 0.01            | 0.00 | 0.01             | 0.00 | 0.95        | 0.10 | 0.34          | 0.00 | $\text{sd}(\mu)/\sigma = 0.5$<br>$\rho = 0.5$<br>$\bar{s}_{Oracle} = 6.7$ |
| CV.min | 0.39  | 0.02 | 0.18            | 0.00 | 0.10             | 0.00 | 0.99        | 0.17 | 0.63          | 0.02 |                                                                           |
| AICc   | 0.55  | 0.02 | 0.82            | 0.07 | 0.99             | 0.09 | 0.96        | 0.06 |               |      |                                                                           |
| AIC    | 0.99  | 0.22 | 0.99            | 0.15 | 0.99             | 0.10 | 0.99        | 0.20 |               |      |                                                                           |
| BIC    | 0.99  | 0.22 | 0.99            | 0.14 | 0.99             | 0.10 | 0.99        | 0.20 |               |      |                                                                           |
| CV.1se | 0.01  | 0.00 | 0.01            | 0.00 | 0.01             | 0.00 | 0.57        | 0.07 | 0.31          | 0.00 | $\text{sd}(\mu)/\sigma = 0.5$<br>$\rho = 0.9$<br>$\bar{s}_{Oracle} = 6.4$ |
| CV.min | 0.41  | 0.04 | 0.23            | 0.01 | 0.11             | 0.00 | 0.95        | 0.16 | 0.60          | 0.04 |                                                                           |
| AICc   | 0.56  | 0.04 | 0.06            | 0.00 | 0.99             | 0.15 | 0.94        | 0.11 |               |      |                                                                           |
| AIC    | 0.99  | 0.24 | 0.99            | 0.20 | 0.99             | 0.16 | 0.99        | 0.26 |               |      |                                                                           |
| BIC    | 0.99  | 0.24 | 0.99            | 0.20 | 0.99             | 0.16 | 0.86        | 0.17 |               |      |                                                                           |

Table 123: **FDR | Sensitivity for n=100, continuous design, dense covariates, and decay 200.**

|        | lasso |      | GL $\gamma = 1$ |      | GL $\gamma = 10$ |      | marginal AL |      | sparsenet MCP |      |                                                                           |
|--------|-------|------|-----------------|------|------------------|------|-------------|------|---------------|------|---------------------------------------------------------------------------|
| CV.1se | 0.03  | 0.00 | 0.02            | 0.00 | 0.01             | 0.00 | 0.82        | 0.10 | 0.25          | 0.00 | $\text{sd}(\mu)/\sigma = 2$<br>$\rho = 0$<br>$\bar{s}_{Oracle} = 91.1$    |
| CV.min | 0.43  | 0.03 | 0.14            | 0.00 | 0.07             | 0.00 | 0.85        | 0.14 | 0.57          | 0.03 |                                                                           |
| AICc   | 0.51  | 0.02 | 0.83            | 0.07 | 0.89             | 0.07 | 0.79        | 0.05 |               |      |                                                                           |
| AIC    | 0.86  | 0.18 | 0.88            | 0.12 | 0.89             | 0.08 | 0.85        | 0.16 |               |      |                                                                           |
| BIC    | 0.86  | 0.18 | 0.88            | 0.12 | 0.89             | 0.08 | 0.85        | 0.16 |               |      |                                                                           |
| CV.1se | 0.02  | 0.00 | 0.02            | 0.00 | 0.00             | 0.00 | 0.86        | 0.06 | 0.27          | 0.00 | $\text{sd}(\mu)/\sigma = 2$<br>$\rho = 0.5$<br>$\bar{s}_{Oracle} = 91.1$  |
| CV.min | 0.40  | 0.01 | 0.18            | 0.00 | 0.09             | 0.00 | 0.88        | 0.10 | 0.54          | 0.01 |                                                                           |
| AICc   | 0.51  | 0.01 | 0.44            | 0.03 | 0.90             | 0.06 | 0.85        | 0.03 |               |      |                                                                           |
| AIC    | 0.89  | 0.14 | 0.89            | 0.11 | 0.90             | 0.08 | 0.89        | 0.12 |               |      |                                                                           |
| BIC    | 0.89  | 0.14 | 0.90            | 0.10 | 0.90             | 0.08 | 0.89        | 0.12 |               |      |                                                                           |
| CV.1se | 0.02  | 0.00 | 0.02            | 0.00 | 0.01             | 0.00 | 0.55        | 0.01 | 0.24          | 0.00 | $\text{sd}(\mu)/\sigma = 2$<br>$\rho = 0.9$<br>$\bar{s}_{Oracle} = 90.5$  |
| CV.min | 0.42  | 0.01 | 0.27            | 0.00 | 0.13             | 0.00 | 0.86        | 0.04 | 0.55          | 0.01 |                                                                           |
| AICc   | 0.52  | 0.01 | 0.07            | 0.00 | 0.90             | 0.07 | 0.83        | 0.02 |               |      |                                                                           |
| AIC    | 0.90  | 0.13 | 0.90            | 0.10 | 0.90             | 0.08 | 0.90        | 0.11 |               |      |                                                                           |
| BIC    | 0.90  | 0.12 | 0.90            | 0.10 | 0.90             | 0.08 | 0.75        | 0.06 |               |      |                                                                           |
| CV.1se | 0.04  | 0.00 | 0.02            | 0.00 | 0.02             | 0.00 | 0.92        | 0.11 | 0.30          | 0.00 | $\text{sd}(\mu)/\sigma = 1$<br>$\rho = 0$<br>$\bar{s}_{Oracle} = 41.2$    |
| CV.min | 0.42  | 0.02 | 0.15            | 0.00 | 0.11             | 0.00 | 0.93        | 0.16 | 0.58          | 0.02 |                                                                           |
| AICc   | 0.58  | 0.02 | 0.94            | 0.08 | 0.95             | 0.08 | 0.90        | 0.06 |               |      |                                                                           |
| AIC    | 0.94  | 0.20 | 0.94            | 0.12 | 0.95             | 0.08 | 0.93        | 0.18 |               |      |                                                                           |
| BIC    | 0.94  | 0.20 | 0.95            | 0.12 | 0.95             | 0.08 | 0.93        | 0.18 |               |      |                                                                           |
| CV.1se | 0.03  | 0.00 | 0.02            | 0.00 | 0.01             | 0.00 | 0.92        | 0.06 | 0.32          | 0.00 | $\text{sd}(\mu)/\sigma = 1$<br>$\rho = 0.5$<br>$\bar{s}_{Oracle} = 41.3$  |
| CV.min | 0.41  | 0.01 | 0.19            | 0.00 | 0.10             | 0.00 | 0.94        | 0.11 | 0.62          | 0.01 |                                                                           |
| AICc   | 0.54  | 0.01 | 0.71            | 0.05 | 0.95             | 0.07 | 0.92        | 0.04 |               |      |                                                                           |
| AIC    | 0.95  | 0.16 | 0.95            | 0.11 | 0.95             | 0.08 | 0.95        | 0.13 |               |      |                                                                           |
| BIC    | 0.95  | 0.16 | 0.95            | 0.11 | 0.95             | 0.08 | 0.95        | 0.13 |               |      |                                                                           |
| CV.1se | 0.02  | 0.00 | 0.02            | 0.00 | 0.01             | 0.00 | 0.55        | 0.02 | 0.29          | 0.00 | $\text{sd}(\mu)/\sigma = 1$<br>$\rho = 0.9$<br>$\bar{s}_{Oracle} = 39.9$  |
| CV.min | 0.39  | 0.01 | 0.25            | 0.01 | 0.10             | 0.00 | 0.92        | 0.06 | 0.57          | 0.01 |                                                                           |
| AICc   | 0.54  | 0.02 | 0.06            | 0.00 | 0.95             | 0.08 | 0.89        | 0.04 |               |      |                                                                           |
| AIC    | 0.95  | 0.15 | 0.95            | 0.12 | 0.96             | 0.10 | 0.95        | 0.15 |               |      |                                                                           |
| BIC    | 0.95  | 0.15 | 0.95            | 0.12 | 0.96             | 0.10 | 0.80        | 0.09 |               |      |                                                                           |
| CV.1se | 0.02  | 0.00 | 0.02            | 0.00 | 0.02             | 0.00 | 0.98        | 0.12 | 0.33          | 0.00 | $\text{sd}(\mu)/\sigma = 0.5$<br>$\rho = 0$<br>$\bar{s}_{Oracle} = 5.4$   |
| CV.min | 0.43  | 0.01 | 0.14            | 0.00 | 0.10             | 0.00 | 0.99        | 0.17 | 0.64          | 0.02 |                                                                           |
| AICc   | 0.58  | 0.02 | 0.99            | 0.09 | 0.99             | 0.08 | 0.97        | 0.06 |               |      |                                                                           |
| AIC    | 0.99  | 0.21 | 0.99            | 0.13 | 0.99             | 0.08 | 0.99        | 0.18 |               |      |                                                                           |
| BIC    | 0.99  | 0.20 | 0.99            | 0.12 | 0.99             | 0.08 | 0.99        | 0.18 |               |      |                                                                           |
| CV.1se | 0.03  | 0.00 | 0.02            | 0.00 | 0.01             | 0.00 | 0.95        | 0.09 | 0.33          | 0.00 | $\text{sd}(\mu)/\sigma = 0.5$<br>$\rho = 0.5$<br>$\bar{s}_{Oracle} = 5.5$ |
| CV.min | 0.41  | 0.02 | 0.16            | 0.00 | 0.10             | 0.00 | 0.99        | 0.15 | 0.63          | 0.01 |                                                                           |
| AICc   | 0.57  | 0.01 | 0.97            | 0.07 | 0.99             | 0.08 | 0.96        | 0.05 |               |      |                                                                           |
| AIC    | 0.99  | 0.21 | 0.99            | 0.12 | 0.99             | 0.09 | 0.99        | 0.18 |               |      |                                                                           |
| BIC    | 0.99  | 0.21 | 0.99            | 0.12 | 0.99             | 0.08 | 0.99        | 0.18 |               |      |                                                                           |
| CV.1se | 0.01  | 0.00 | 0.01            | 0.00 | 0.01             | 0.00 | 0.57        | 0.04 | 0.33          | 0.00 | $\text{sd}(\mu)/\sigma = 0.5$<br>$\rho = 0.9$<br>$\bar{s}_{Oracle} = 5.3$ |
| CV.min | 0.40  | 0.02 | 0.23            | 0.01 | 0.11             | 0.00 | 0.97        | 0.12 | 0.61          | 0.03 |                                                                           |
| AICc   | 0.57  | 0.03 | 0.11            | 0.01 | 0.99             | 0.13 | 0.94        | 0.08 |               |      |                                                                           |
| AIC    | 0.99  | 0.23 | 0.99            | 0.18 | 0.99             | 0.15 | 0.99        | 0.22 |               |      |                                                                           |
| BIC    | 0.99  | 0.23 | 0.99            | 0.18 | 0.99             | 0.15 | 0.86        | 0.14 |               |      |                                                                           |

Table 124: **FDR | Sensitivity for n=100, binary design, sparse covariates, and decay 10.**

|        | lasso |      | GL $\gamma = 1$ |      | GL $\gamma = 10$ |      | marginal AL |      | sparsenet MCP |      |                                                                     |
|--------|-------|------|-----------------|------|------------------|------|-------------|------|---------------|------|---------------------------------------------------------------------|
| CV.1se | 0.44  | 0.66 | 0.28            | 0.65 | 0.05             | 0.44 | 0.72        | 0.81 | 0.17          | 0.65 | $sd(\mu)/\sigma = 2$<br>$\rho = 0$<br>$\bar{s}_{Oracle} = 10.0$     |
| CV.min | 0.80  | 0.88 | 0.65            | 0.86 | 0.21             | 0.67 | 0.85        | 0.87 | 0.46          | 0.82 |                                                                     |
| AICc   | 0.64  | 0.80 | 0.47            | 0.81 | 0.80             | 0.88 | 0.69        | 0.79 |               |      |                                                                     |
| AIC    | 0.91  | 0.93 | 0.90            | 0.92 | 0.88             | 0.88 | 0.89        | 0.88 |               |      |                                                                     |
| BIC    | 0.91  | 0.92 | 0.90            | 0.92 | 0.88             | 0.88 | 0.82        | 0.85 |               |      |                                                                     |
| CV.1se | 0.42  | 0.55 | 0.27            | 0.56 | 0.05             | 0.36 | 0.76        | 0.78 | 0.17          | 0.60 | $sd(\mu)/\sigma = 2$<br>$\rho = 0.5$<br>$\bar{s}_{Oracle} = 10.0$   |
| CV.min | 0.80  | 0.83 | 0.66            | 0.82 | 0.20             | 0.60 | 0.86        | 0.84 | 0.44          | 0.80 |                                                                     |
| AICc   | 0.64  | 0.74 | 0.50            | 0.77 | 0.81             | 0.86 | 0.71        | 0.74 |               |      |                                                                     |
| AIC    | 0.92  | 0.92 | 0.91            | 0.92 | 0.88             | 0.87 | 0.90        | 0.86 |               |      |                                                                     |
| BIC    | 0.91  | 0.91 | 0.90            | 0.91 | 0.88             | 0.87 | 0.85        | 0.84 |               |      |                                                                     |
| CV.1se | 0.42  | 0.51 | 0.30            | 0.52 | 0.05             | 0.33 | 0.77        | 0.75 | 0.19          | 0.57 | $sd(\mu)/\sigma = 2$<br>$\rho = 0.9$<br>$\bar{s}_{Oracle} = 10.0$   |
| CV.min | 0.80  | 0.80 | 0.68            | 0.78 | 0.22             | 0.55 | 0.87        | 0.82 | 0.47          | 0.75 |                                                                     |
| AICc   | 0.66  | 0.69 | 0.52            | 0.72 | 0.81             | 0.82 | 0.72        | 0.70 |               |      |                                                                     |
| AIC    | 0.92  | 0.89 | 0.91            | 0.89 | 0.89             | 0.83 | 0.90        | 0.84 |               |      |                                                                     |
| BIC    | 0.92  | 0.89 | 0.91            | 0.89 | 0.89             | 0.83 | 0.85        | 0.81 |               |      |                                                                     |
| CV.1se | 0.12  | 0.10 | 0.08            | 0.07 | 0.02             | 0.03 | 0.84        | 0.56 | 0.13          | 0.10 | $sd(\mu)/\sigma = 1$<br>$\rho = 0$<br>$\bar{s}_{Oracle} = 10.0$     |
| CV.min | 0.64  | 0.40 | 0.39            | 0.25 | 0.13             | 0.10 | 0.91        | 0.62 | 0.54          | 0.36 |                                                                     |
| AICc   | 0.59  | 0.35 | 0.44            | 0.29 | 0.92             | 0.39 | 0.78        | 0.48 |               |      |                                                                     |
| AIC    | 0.94  | 0.66 | 0.94            | 0.58 | 0.94             | 0.42 | 0.93        | 0.64 |               |      |                                                                     |
| BIC    | 0.94  | 0.66 | 0.94            | 0.58 | 0.94             | 0.42 | 0.93        | 0.63 |               |      |                                                                     |
| CV.1se | 0.10  | 0.07 | 0.07            | 0.05 | 0.03             | 0.03 | 0.86        | 0.51 | 0.13          | 0.07 | $sd(\mu)/\sigma = 1$<br>$\rho = 0.5$<br>$\bar{s}_{Oracle} = 10.0$   |
| CV.min | 0.62  | 0.34 | 0.40            | 0.22 | 0.11             | 0.09 | 0.92        | 0.58 | 0.51          | 0.30 |                                                                     |
| AICc   | 0.60  | 0.30 | 0.43            | 0.25 | 0.93             | 0.38 | 0.79        | 0.42 |               |      |                                                                     |
| AIC    | 0.94  | 0.63 | 0.94            | 0.56 | 0.95             | 0.40 | 0.94        | 0.60 |               |      |                                                                     |
| BIC    | 0.94  | 0.63 | 0.94            | 0.55 | 0.95             | 0.40 | 0.93        | 0.59 |               |      |                                                                     |
| CV.1se | 0.11  | 0.07 | 0.07            | 0.05 | 0.02             | 0.03 | 0.86        | 0.48 | 0.14          | 0.08 | $sd(\mu)/\sigma = 1$<br>$\rho = 0.9$<br>$\bar{s}_{Oracle} = 10.0$   |
| CV.min | 0.62  | 0.32 | 0.41            | 0.21 | 0.13             | 0.09 | 0.92        | 0.56 | 0.51          | 0.28 |                                                                     |
| AICc   | 0.60  | 0.28 | 0.43            | 0.23 | 0.93             | 0.36 | 0.81        | 0.40 |               |      |                                                                     |
| AIC    | 0.94  | 0.61 | 0.94            | 0.55 | 0.95             | 0.38 | 0.94        | 0.58 |               |      |                                                                     |
| BIC    | 0.94  | 0.61 | 0.94            | 0.54 | 0.95             | 0.38 | 0.93        | 0.58 |               |      |                                                                     |
| CV.1se | 0.04  | 0.00 | 0.02            | 0.00 | 0.01             | 0.00 | 0.94        | 0.26 | 0.26          | 0.01 | $sd(\mu)/\sigma = 0.5$<br>$\rho = 0$<br>$\bar{s}_{Oracle} = 10.0$   |
| CV.min | 0.42  | 0.07 | 0.24            | 0.02 | 0.11             | 0.01 | 0.96        | 0.32 | 0.56          | 0.07 |                                                                     |
| AICc   | 0.56  | 0.07 | 0.73            | 0.13 | 0.97             | 0.15 | 0.90        | 0.17 |               |      |                                                                     |
| AIC    | 0.97  | 0.36 | 0.97            | 0.27 | 0.98             | 0.17 | 0.96        | 0.34 |               |      |                                                                     |
| BIC    | 0.97  | 0.36 | 0.97            | 0.27 | 0.98             | 0.17 | 0.96        | 0.34 |               |      |                                                                     |
| CV.1se | 0.02  | 0.00 | 0.02            | 0.00 | 0.01             | 0.00 | 0.93        | 0.23 | 0.32          | 0.01 | $sd(\mu)/\sigma = 0.5$<br>$\rho = 0.5$<br>$\bar{s}_{Oracle} = 10.0$ |
| CV.min | 0.44  | 0.06 | 0.24            | 0.02 | 0.11             | 0.01 | 0.96        | 0.29 | 0.59          | 0.06 |                                                                     |
| AICc   | 0.55  | 0.06 | 0.70            | 0.11 | 0.97             | 0.14 | 0.91        | 0.15 |               |      |                                                                     |
| AIC    | 0.97  | 0.34 | 0.97            | 0.25 | 0.98             | 0.16 | 0.97        | 0.31 |               |      |                                                                     |
| BIC    | 0.97  | 0.33 | 0.97            | 0.25 | 0.98             | 0.16 | 0.97        | 0.31 |               |      |                                                                     |
| CV.1se | 0.03  | 0.01 | 0.02            | 0.00 | 0.01             | 0.00 | 0.94        | 0.21 | 0.30          | 0.01 | $sd(\mu)/\sigma = 0.5$<br>$\rho = 0.9$<br>$\bar{s}_{Oracle} = 10.0$ |
| CV.min | 0.46  | 0.06 | 0.23            | 0.02 | 0.12             | 0.01 | 0.96        | 0.27 | 0.60          | 0.06 |                                                                     |
| AICc   | 0.56  | 0.06 | 0.65            | 0.10 | 0.97             | 0.14 | 0.92        | 0.14 |               |      |                                                                     |
| AIC    | 0.97  | 0.32 | 0.97            | 0.25 | 0.98             | 0.16 | 0.97        | 0.30 |               |      |                                                                     |
| BIC    | 0.97  | 0.32 | 0.97            | 0.24 | 0.98             | 0.16 | 0.97        | 0.29 |               |      |                                                                     |

Table 125: **FDR | Sensitivity for n=100, binary design, sparse covariates, and decay 50.**

|        | lasso |      | GL $\gamma = 1$ |      | GL $\gamma = 10$ |      | marginal AL |      | sparsenet MCP |      |                                                                          |
|--------|-------|------|-----------------|------|------------------|------|-------------|------|---------------|------|--------------------------------------------------------------------------|
| CV.lse | 0.43  | 0.69 | 0.24            | 0.63 | 0.05             | 0.24 | 0.74        | 0.92 | 0.31          | 0.73 | sd( $\mu$ )/ $\sigma = 2$<br>$\rho = 0$<br>$\bar{s}_{Oracle} = 10.0$     |
| CV.min | 0.79  | 0.94 | 0.61            | 0.91 | 0.18             | 0.53 | 0.85        | 0.95 | 0.65          | 0.93 |                                                                          |
| AICc   | 0.63  | 0.88 | 0.47            | 0.92 | 0.81             | 0.90 | 0.68        | 0.88 |               |      |                                                                          |
| AIC    | 0.91  | 0.98 | 0.90            | 0.98 | 0.87             | 0.91 | 0.89        | 0.96 |               |      |                                                                          |
| BIC    | 0.91  | 0.98 | 0.90            | 0.98 | 0.87             | 0.91 | 0.87        | 0.95 |               |      |                                                                          |
| CV.lse | 0.37  | 0.52 | 0.22            | 0.48 | 0.04             | 0.19 | 0.77        | 0.88 | 0.29          | 0.61 | sd( $\mu$ )/ $\sigma = 2$<br>$\rho = 0.5$<br>$\bar{s}_{Oracle} = 10.0$   |
| CV.min | 0.78  | 0.89 | 0.60            | 0.84 | 0.16             | 0.42 | 0.86        | 0.93 | 0.62          | 0.87 |                                                                          |
| AICc   | 0.63  | 0.79 | 0.52            | 0.89 | 0.82             | 0.88 | 0.71        | 0.83 |               |      |                                                                          |
| AIC    | 0.91  | 0.97 | 0.90            | 0.97 | 0.88             | 0.89 | 0.89        | 0.94 |               |      |                                                                          |
| BIC    | 0.91  | 0.97 | 0.90            | 0.97 | 0.88             | 0.89 | 0.88        | 0.94 |               |      |                                                                          |
| CV.lse | 0.37  | 0.47 | 0.24            | 0.43 | 0.04             | 0.14 | 0.78        | 0.85 | 0.31          | 0.55 | sd( $\mu$ )/ $\sigma = 2$<br>$\rho = 0.9$<br>$\bar{s}_{Oracle} = 10.0$   |
| CV.min | 0.78  | 0.86 | 0.60            | 0.77 | 0.17             | 0.36 | 0.87        | 0.91 | 0.63          | 0.82 |                                                                          |
| AICc   | 0.64  | 0.75 | 0.55            | 0.84 | 0.82             | 0.83 | 0.72        | 0.79 |               |      |                                                                          |
| AIC    | 0.91  | 0.96 | 0.90            | 0.95 | 0.89             | 0.84 | 0.90        | 0.92 |               |      |                                                                          |
| BIC    | 0.91  | 0.95 | 0.90            | 0.95 | 0.88             | 0.84 | 0.89        | 0.91 |               |      |                                                                          |
| CV.lse | 0.10  | 0.07 | 0.04            | 0.03 | 0.01             | 0.01 | 0.85        | 0.59 | 0.16          | 0.07 | sd( $\mu$ )/ $\sigma = 1$<br>$\rho = 0$<br>$\bar{s}_{Oracle} = 10.0$     |
| CV.min | 0.60  | 0.38 | 0.30            | 0.17 | 0.11             | 0.06 | 0.91        | 0.67 | 0.55          | 0.35 |                                                                          |
| AICc   | 0.56  | 0.32 | 0.61            | 0.36 | 0.93             | 0.37 | 0.78        | 0.49 |               |      |                                                                          |
| AIC    | 0.94  | 0.70 | 0.94            | 0.57 | 0.95             | 0.39 | 0.93        | 0.68 |               |      |                                                                          |
| BIC    | 0.94  | 0.70 | 0.94            | 0.57 | 0.95             | 0.38 | 0.93        | 0.68 |               |      |                                                                          |
| CV.lse | 0.08  | 0.04 | 0.04            | 0.03 | 0.01             | 0.01 | 0.86        | 0.55 | 0.16          | 0.05 | sd( $\mu$ )/ $\sigma = 1$<br>$\rho = 0.5$<br>$\bar{s}_{Oracle} = 10.0$   |
| CV.min | 0.56  | 0.30 | 0.28            | 0.13 | 0.10             | 0.05 | 0.92        | 0.62 | 0.54          | 0.28 |                                                                          |
| AICc   | 0.56  | 0.27 | 0.60            | 0.31 | 0.94             | 0.33 | 0.79        | 0.43 |               |      |                                                                          |
| AIC    | 0.94  | 0.67 | 0.94            | 0.55 | 0.95             | 0.35 | 0.93        | 0.64 |               |      |                                                                          |
| BIC    | 0.94  | 0.67 | 0.94            | 0.54 | 0.95             | 0.35 | 0.93        | 0.64 |               |      |                                                                          |
| CV.lse | 0.08  | 0.04 | 0.04            | 0.02 | 0.02             | 0.01 | 0.87        | 0.51 | 0.19          | 0.06 | sd( $\mu$ )/ $\sigma = 1$<br>$\rho = 0.9$<br>$\bar{s}_{Oracle} = 10.0$   |
| CV.min | 0.56  | 0.28 | 0.29            | 0.12 | 0.11             | 0.04 | 0.92        | 0.59 | 0.56          | 0.26 |                                                                          |
| AICc   | 0.57  | 0.25 | 0.59            | 0.28 | 0.94             | 0.33 | 0.81        | 0.41 |               |      |                                                                          |
| AIC    | 0.94  | 0.65 | 0.94            | 0.53 | 0.95             | 0.35 | 0.93        | 0.62 |               |      |                                                                          |
| BIC    | 0.94  | 0.65 | 0.94            | 0.53 | 0.95             | 0.35 | 0.93        | 0.61 |               |      |                                                                          |
| CV.lse | 0.02  | 0.00 | 0.02            | 0.00 | 0.01             | 0.00 | 0.93        | 0.26 | 0.29          | 0.01 | sd( $\mu$ )/ $\sigma = 0.5$<br>$\rho = 0$<br>$\bar{s}_{Oracle} = 10.0$   |
| CV.min | 0.44  | 0.06 | 0.20            | 0.01 | 0.10             | 0.01 | 0.96        | 0.32 | 0.56          | 0.06 |                                                                          |
| AICc   | 0.54  | 0.06 | 0.92            | 0.17 | 0.97             | 0.14 | 0.91        | 0.16 |               |      |                                                                          |
| AIC    | 0.97  | 0.37 | 0.97            | 0.25 | 0.98             | 0.15 | 0.96        | 0.34 |               |      |                                                                          |
| BIC    | 0.97  | 0.36 | 0.97            | 0.25 | 0.98             | 0.15 | 0.96        | 0.34 |               |      |                                                                          |
| CV.lse | 0.02  | 0.00 | 0.02            | 0.00 | 0.01             | 0.00 | 0.94        | 0.23 | 0.32          | 0.01 | sd( $\mu$ )/ $\sigma = 0.5$<br>$\rho = 0.5$<br>$\bar{s}_{Oracle} = 10.0$ |
| CV.min | 0.43  | 0.05 | 0.19            | 0.01 | 0.10             | 0.01 | 0.96        | 0.30 | 0.59          | 0.05 |                                                                          |
| AICc   | 0.55  | 0.05 | 0.89            | 0.15 | 0.98             | 0.13 | 0.91        | 0.15 |               |      |                                                                          |
| AIC    | 0.97  | 0.34 | 0.97            | 0.23 | 0.98             | 0.15 | 0.97        | 0.32 |               |      |                                                                          |
| BIC    | 0.97  | 0.34 | 0.97            | 0.23 | 0.98             | 0.14 | 0.97        | 0.32 |               |      |                                                                          |
| CV.lse | 0.03  | 0.00 | 0.03            | 0.00 | 0.01             | 0.00 | 0.94        | 0.21 | 0.30          | 0.01 | sd( $\mu$ )/ $\sigma = 0.5$<br>$\rho = 0.9$<br>$\bar{s}_{Oracle} = 10.0$ |
| CV.min | 0.46  | 0.06 | 0.21            | 0.01 | 0.10             | 0.01 | 0.96        | 0.28 | 0.61          | 0.05 |                                                                          |
| AICc   | 0.58  | 0.05 | 0.90            | 0.14 | 0.98             | 0.13 | 0.92        | 0.14 |               |      |                                                                          |
| AIC    | 0.97  | 0.33 | 0.98            | 0.23 | 0.98             | 0.15 | 0.97        | 0.30 |               |      |                                                                          |
| BIC    | 0.97  | 0.33 | 0.98            | 0.22 | 0.98             | 0.15 | 0.97        | 0.30 |               |      |                                                                          |

Table 126: **FDR | Sensitivity for n=100, binary design, sparse covariates, and decay 100.**

|        | lasso |      | GL $\gamma = 1$ |      | GL $\gamma = 10$ |      | marginal AL |      | sparsenet MCP |      |                                                                            |
|--------|-------|------|-----------------|------|------------------|------|-------------|------|---------------|------|----------------------------------------------------------------------------|
| CV.1se | 0.43  | 0.68 | 0.23            | 0.62 | 0.05             | 0.23 | 0.74        | 0.92 | 0.32          | 0.72 | $\text{sd}(\mu)/\sigma = 2$<br>$\rho = 0$<br>$\bar{s}_{Oracle} = 10.0$     |
| CV.min | 0.79  | 0.94 | 0.60            | 0.90 | 0.16             | 0.49 | 0.85        | 0.96 | 0.65          | 0.92 |                                                                            |
| AICc   | 0.63  | 0.88 | 0.47            | 0.93 | 0.82             | 0.90 | 0.69        | 0.89 |               |      |                                                                            |
| AIC    | 0.91  | 0.98 | 0.90            | 0.98 | 0.87             | 0.90 | 0.89        | 0.96 |               |      |                                                                            |
| BIC    | 0.91  | 0.98 | 0.89            | 0.98 | 0.87             | 0.90 | 0.87        | 0.96 |               |      |                                                                            |
| CV.1se | 0.37  | 0.51 | 0.21            | 0.47 | 0.04             | 0.16 | 0.77        | 0.89 | 0.29          | 0.61 | $\text{sd}(\mu)/\sigma = 2$<br>$\rho = 0.5$<br>$\bar{s}_{Oracle} = 10.0$   |
| CV.min | 0.77  | 0.88 | 0.59            | 0.83 | 0.15             | 0.40 | 0.86        | 0.94 | 0.64          | 0.87 |                                                                            |
| AICc   | 0.63  | 0.79 | 0.51            | 0.90 | 0.82             | 0.87 | 0.71        | 0.83 |               |      |                                                                            |
| AIC    | 0.91  | 0.97 | 0.90            | 0.97 | 0.88             | 0.88 | 0.89        | 0.94 |               |      |                                                                            |
| BIC    | 0.91  | 0.97 | 0.90            | 0.97 | 0.88             | 0.88 | 0.88        | 0.94 |               |      |                                                                            |
| CV.1se | 0.37  | 0.46 | 0.22            | 0.41 | 0.04             | 0.14 | 0.78        | 0.86 | 0.30          | 0.54 | $\text{sd}(\mu)/\sigma = 2$<br>$\rho = 0.9$<br>$\bar{s}_{Oracle} = 10.0$   |
| CV.min | 0.78  | 0.86 | 0.59            | 0.76 | 0.16             | 0.34 | 0.87        | 0.91 | 0.64          | 0.83 |                                                                            |
| AICc   | 0.64  | 0.75 | 0.55            | 0.85 | 0.83             | 0.82 | 0.72        | 0.80 |               |      |                                                                            |
| AIC    | 0.91  | 0.96 | 0.90            | 0.95 | 0.89             | 0.83 | 0.90        | 0.92 |               |      |                                                                            |
| BIC    | 0.91  | 0.95 | 0.90            | 0.95 | 0.88             | 0.83 | 0.88        | 0.92 |               |      |                                                                            |
| CV.1se | 0.10  | 0.06 | 0.04            | 0.03 | 0.01             | 0.01 | 0.85        | 0.60 | 0.17          | 0.07 | $\text{sd}(\mu)/\sigma = 1$<br>$\rho = 0$<br>$\bar{s}_{Oracle} = 10.0$     |
| CV.min | 0.59  | 0.38 | 0.29            | 0.15 | 0.11             | 0.05 | 0.91        | 0.67 | 0.56          | 0.34 |                                                                            |
| AICc   | 0.55  | 0.32 | 0.65            | 0.38 | 0.93             | 0.37 | 0.78        | 0.49 |               |      |                                                                            |
| AIC    | 0.94  | 0.71 | 0.94            | 0.57 | 0.95             | 0.38 | 0.93        | 0.69 |               |      |                                                                            |
| BIC    | 0.94  | 0.71 | 0.94            | 0.57 | 0.95             | 0.38 | 0.93        | 0.68 |               |      |                                                                            |
| CV.1se | 0.07  | 0.04 | 0.04            | 0.03 | 0.01             | 0.01 | 0.86        | 0.55 | 0.18          | 0.05 | $\text{sd}(\mu)/\sigma = 1$<br>$\rho = 0.5$<br>$\bar{s}_{Oracle} = 10.0$   |
| CV.min | 0.56  | 0.30 | 0.27            | 0.12 | 0.10             | 0.05 | 0.92        | 0.63 | 0.55          | 0.28 |                                                                            |
| AICc   | 0.56  | 0.27 | 0.62            | 0.33 | 0.94             | 0.34 | 0.79        | 0.44 |               |      |                                                                            |
| AIC    | 0.94  | 0.67 | 0.94            | 0.54 | 0.95             | 0.36 | 0.93        | 0.64 |               |      |                                                                            |
| BIC    | 0.94  | 0.67 | 0.94            | 0.54 | 0.95             | 0.36 | 0.93        | 0.64 |               |      |                                                                            |
| CV.1se | 0.08  | 0.04 | 0.04            | 0.02 | 0.02             | 0.01 | 0.87        | 0.52 | 0.17          | 0.05 | $\text{sd}(\mu)/\sigma = 1$<br>$\rho = 0.9$<br>$\bar{s}_{Oracle} = 10.0$   |
| CV.min | 0.56  | 0.28 | 0.28            | 0.12 | 0.09             | 0.04 | 0.92        | 0.59 | 0.55          | 0.26 |                                                                            |
| AICc   | 0.57  | 0.24 | 0.61            | 0.30 | 0.94             | 0.33 | 0.81        | 0.41 |               |      |                                                                            |
| AIC    | 0.94  | 0.65 | 0.94            | 0.52 | 0.95             | 0.35 | 0.93        | 0.62 |               |      |                                                                            |
| BIC    | 0.94  | 0.65 | 0.94            | 0.52 | 0.95             | 0.34 | 0.93        | 0.61 |               |      |                                                                            |
| CV.1se | 0.03  | 0.00 | 0.02            | 0.00 | 0.01             | 0.00 | 0.93        | 0.26 | 0.30          | 0.01 | $\text{sd}(\mu)/\sigma = 0.5$<br>$\rho = 0$<br>$\bar{s}_{Oracle} = 10.0$   |
| CV.min | 0.44  | 0.06 | 0.21            | 0.01 | 0.10             | 0.01 | 0.96        | 0.32 | 0.57          | 0.06 |                                                                            |
| AICc   | 0.54  | 0.06 | 0.93            | 0.17 | 0.97             | 0.14 | 0.91        | 0.16 |               |      |                                                                            |
| AIC    | 0.97  | 0.37 | 0.97            | 0.24 | 0.98             | 0.15 | 0.96        | 0.34 |               |      |                                                                            |
| BIC    | 0.97  | 0.36 | 0.97            | 0.24 | 0.98             | 0.15 | 0.96        | 0.34 |               |      |                                                                            |
| CV.1se | 0.02  | 0.00 | 0.02            | 0.00 | 0.01             | 0.00 | 0.94        | 0.23 | 0.30          | 0.01 | $\text{sd}(\mu)/\sigma = 0.5$<br>$\rho = 0.5$<br>$\bar{s}_{Oracle} = 10.0$ |
| CV.min | 0.43  | 0.05 | 0.18            | 0.01 | 0.10             | 0.01 | 0.96        | 0.30 | 0.59          | 0.05 |                                                                            |
| AICc   | 0.56  | 0.05 | 0.92            | 0.15 | 0.98             | 0.13 | 0.91        | 0.15 |               |      |                                                                            |
| AIC    | 0.97  | 0.34 | 0.97            | 0.24 | 0.98             | 0.15 | 0.97        | 0.32 |               |      |                                                                            |
| BIC    | 0.97  | 0.34 | 0.97            | 0.23 | 0.98             | 0.14 | 0.97        | 0.32 |               |      |                                                                            |
| CV.1se | 0.02  | 0.00 | 0.02            | 0.00 | 0.01             | 0.00 | 0.94        | 0.21 | 0.31          | 0.01 | $\text{sd}(\mu)/\sigma = 0.5$<br>$\rho = 0.9$<br>$\bar{s}_{Oracle} = 10.0$ |
| CV.min | 0.46  | 0.05 | 0.20            | 0.01 | 0.10             | 0.01 | 0.96        | 0.28 | 0.61          | 0.05 |                                                                            |
| AICc   | 0.57  | 0.05 | 0.91            | 0.14 | 0.98             | 0.13 | 0.92        | 0.14 |               |      |                                                                            |
| AIC    | 0.97  | 0.33 | 0.98            | 0.22 | 0.98             | 0.14 | 0.97        | 0.30 |               |      |                                                                            |
| BIC    | 0.97  | 0.33 | 0.98            | 0.22 | 0.98             | 0.14 | 0.97        | 0.30 |               |      |                                                                            |

Table 127: **FDR | Sensitivity for n=100, binary design, sparse covariates, and decay 200.**

|        | lasso |      | GL $\gamma = 1$ |      | GL $\gamma = 10$ |      | marginal AL |      | sparsenet MCP |      |                                                                            |
|--------|-------|------|-----------------|------|------------------|------|-------------|------|---------------|------|----------------------------------------------------------------------------|
| CV.lse | 0.43  | 0.69 | 0.23            | 0.61 | 0.05             | 0.23 | 0.74        | 0.92 | 0.32          | 0.72 | $\text{sd}(\mu)/\sigma = 2$<br>$\rho = 0$<br>$\bar{s}_{Oracle} = 10.0$     |
| CV.min | 0.79  | 0.94 | 0.59            | 0.90 | 0.17             | 0.50 | 0.85        | 0.96 | 0.65          | 0.92 |                                                                            |
| AICc   | 0.63  | 0.88 | 0.47            | 0.93 | 0.82             | 0.89 | 0.69        | 0.89 |               |      |                                                                            |
| AIC    | 0.91  | 0.98 | 0.90            | 0.98 | 0.87             | 0.90 | 0.89        | 0.96 |               |      |                                                                            |
| BIC    | 0.91  | 0.98 | 0.89            | 0.98 | 0.87             | 0.90 | 0.87        | 0.96 |               |      |                                                                            |
| CV.lse | 0.36  | 0.52 | 0.20            | 0.46 | 0.03             | 0.16 | 0.77        | 0.89 | 0.29          | 0.61 | $\text{sd}(\mu)/\sigma = 2$<br>$\rho = 0.5$<br>$\bar{s}_{Oracle} = 10.0$   |
| CV.min | 0.77  | 0.89 | 0.58            | 0.82 | 0.15             | 0.40 | 0.86        | 0.94 | 0.64          | 0.88 |                                                                            |
| AICc   | 0.63  | 0.80 | 0.51            | 0.91 | 0.82             | 0.88 | 0.71        | 0.84 |               |      |                                                                            |
| AIC    | 0.91  | 0.97 | 0.90            | 0.97 | 0.88             | 0.88 | 0.89        | 0.94 |               |      |                                                                            |
| BIC    | 0.91  | 0.97 | 0.90            | 0.97 | 0.87             | 0.88 | 0.88        | 0.94 |               |      |                                                                            |
| CV.lse | 0.38  | 0.47 | 0.22            | 0.42 | 0.04             | 0.14 | 0.78        | 0.86 | 0.30          | 0.55 | $\text{sd}(\mu)/\sigma = 2$<br>$\rho = 0.9$<br>$\bar{s}_{Oracle} = 10.0$   |
| CV.min | 0.78  | 0.86 | 0.59            | 0.76 | 0.16             | 0.34 | 0.87        | 0.91 | 0.64          | 0.83 |                                                                            |
| AICc   | 0.64  | 0.74 | 0.55            | 0.85 | 0.83             | 0.82 | 0.72        | 0.80 |               |      |                                                                            |
| AIC    | 0.91  | 0.96 | 0.90            | 0.95 | 0.89             | 0.83 | 0.90        | 0.92 |               |      |                                                                            |
| BIC    | 0.91  | 0.95 | 0.90            | 0.95 | 0.88             | 0.83 | 0.89        | 0.92 |               |      |                                                                            |
| CV.lse | 0.10  | 0.07 | 0.04            | 0.03 | 0.02             | 0.01 | 0.85        | 0.59 | 0.17          | 0.07 | $\text{sd}(\mu)/\sigma = 1$<br>$\rho = 0$<br>$\bar{s}_{Oracle} = 10.0$     |
| CV.min | 0.59  | 0.38 | 0.28            | 0.15 | 0.11             | 0.06 | 0.91        | 0.67 | 0.55          | 0.34 |                                                                            |
| AICc   | 0.55  | 0.32 | 0.67            | 0.38 | 0.93             | 0.37 | 0.78        | 0.49 |               |      |                                                                            |
| AIC    | 0.94  | 0.71 | 0.94            | 0.57 | 0.95             | 0.38 | 0.93        | 0.68 |               |      |                                                                            |
| BIC    | 0.94  | 0.70 | 0.94            | 0.57 | 0.95             | 0.38 | 0.93        | 0.68 |               |      |                                                                            |
| CV.lse | 0.08  | 0.04 | 0.04            | 0.03 | 0.02             | 0.01 | 0.87        | 0.54 | 0.17          | 0.05 | $\text{sd}(\mu)/\sigma = 1$<br>$\rho = 0.5$<br>$\bar{s}_{Oracle} = 10.0$   |
| CV.min | 0.55  | 0.30 | 0.27            | 0.12 | 0.10             | 0.04 | 0.92        | 0.62 | 0.53          | 0.28 |                                                                            |
| AICc   | 0.56  | 0.26 | 0.64            | 0.33 | 0.94             | 0.34 | 0.79        | 0.43 |               |      |                                                                            |
| AIC    | 0.94  | 0.67 | 0.94            | 0.54 | 0.95             | 0.35 | 0.93        | 0.64 |               |      |                                                                            |
| BIC    | 0.94  | 0.67 | 0.94            | 0.54 | 0.95             | 0.35 | 0.93        | 0.64 |               |      |                                                                            |
| CV.lse | 0.08  | 0.04 | 0.04            | 0.02 | 0.02             | 0.01 | 0.87        | 0.52 | 0.19          | 0.05 | $\text{sd}(\mu)/\sigma = 1$<br>$\rho = 0.9$<br>$\bar{s}_{Oracle} = 10.0$   |
| CV.min | 0.56  | 0.28 | 0.28            | 0.11 | 0.10             | 0.04 | 0.92        | 0.60 | 0.56          | 0.25 |                                                                            |
| AICc   | 0.56  | 0.24 | 0.64            | 0.30 | 0.94             | 0.33 | 0.81        | 0.41 |               |      |                                                                            |
| AIC    | 0.94  | 0.65 | 0.94            | 0.52 | 0.95             | 0.35 | 0.93        | 0.62 |               |      |                                                                            |
| BIC    | 0.94  | 0.65 | 0.94            | 0.52 | 0.95             | 0.34 | 0.93        | 0.61 |               |      |                                                                            |
| CV.lse | 0.03  | 0.00 | 0.02            | 0.00 | 0.02             | 0.00 | 0.94        | 0.26 | 0.28          | 0.01 | $\text{sd}(\mu)/\sigma = 0.5$<br>$\rho = 0$<br>$\bar{s}_{Oracle} = 10.0$   |
| CV.min | 0.43  | 0.06 | 0.20            | 0.01 | 0.10             | 0.01 | 0.96        | 0.32 | 0.58          | 0.06 |                                                                            |
| AICc   | 0.54  | 0.06 | 0.94            | 0.17 | 0.97             | 0.14 | 0.91        | 0.16 |               |      |                                                                            |
| AIC    | 0.97  | 0.37 | 0.97            | 0.24 | 0.98             | 0.15 | 0.96        | 0.34 |               |      |                                                                            |
| BIC    | 0.97  | 0.36 | 0.97            | 0.23 | 0.98             | 0.15 | 0.96        | 0.34 |               |      |                                                                            |
| CV.lse | 0.02  | 0.00 | 0.02            | 0.00 | 0.01             | 0.00 | 0.94        | 0.23 | 0.31          | 0.01 | $\text{sd}(\mu)/\sigma = 0.5$<br>$\rho = 0.5$<br>$\bar{s}_{Oracle} = 10.0$ |
| CV.min | 0.43  | 0.05 | 0.18            | 0.01 | 0.10             | 0.01 | 0.96        | 0.30 | 0.58          | 0.05 |                                                                            |
| AICc   | 0.56  | 0.05 | 0.92            | 0.15 | 0.98             | 0.13 | 0.91        | 0.15 |               |      |                                                                            |
| AIC    | 0.97  | 0.34 | 0.97            | 0.23 | 0.98             | 0.15 | 0.97        | 0.32 |               |      |                                                                            |
| BIC    | 0.97  | 0.34 | 0.97            | 0.23 | 0.98             | 0.14 | 0.97        | 0.32 |               |      |                                                                            |
| CV.lse | 0.02  | 0.00 | 0.02            | 0.00 | 0.01             | 0.00 | 0.94        | 0.21 | 0.31          | 0.01 | $\text{sd}(\mu)/\sigma = 0.5$<br>$\rho = 0.9$<br>$\bar{s}_{Oracle} = 10.0$ |
| CV.min | 0.46  | 0.05 | 0.21            | 0.01 | 0.10             | 0.01 | 0.96        | 0.28 | 0.61          | 0.06 |                                                                            |
| AICc   | 0.58  | 0.05 | 0.92            | 0.15 | 0.98             | 0.12 | 0.92        | 0.14 |               |      |                                                                            |
| AIC    | 0.97  | 0.33 | 0.98            | 0.22 | 0.98             | 0.14 | 0.97        | 0.30 |               |      |                                                                            |
| BIC    | 0.97  | 0.33 | 0.98            | 0.22 | 0.98             | 0.14 | 0.97        | 0.30 |               |      |                                                                            |

Table 128: **FDR | Sensitivity for n=100, continuous design, sparse covariates, and decay 10.**

|        | lasso |      | GL $\gamma = 1$ |      | GL $\gamma = 10$ |      | marginal AL |      | sparsenet MCP |      |                                                                            |
|--------|-------|------|-----------------|------|------------------|------|-------------|------|---------------|------|----------------------------------------------------------------------------|
| CV.1se | 0.42  | 0.64 | 0.26            | 0.63 | 0.05             | 0.42 | 0.72        | 0.81 | 0.16          | 0.64 | $\text{sd}(\mu)/\sigma = 2$<br>$\rho = 0$<br>$\bar{s}_{Oracle} = 10.0$     |
| CV.min | 0.78  | 0.87 | 0.64            | 0.85 | 0.18             | 0.64 | 0.85        | 0.87 | 0.44          | 0.81 |                                                                            |
| AICc   | 0.63  | 0.79 | 0.34            | 0.73 | 0.65             | 0.81 | 0.69        | 0.79 |               |      |                                                                            |
| AIC    | 0.91  | 0.92 | 0.90            | 0.92 | 0.88             | 0.88 | 0.89        | 0.88 |               |      |                                                                            |
| BIC    | 0.91  | 0.92 | 0.90            | 0.92 | 0.88             | 0.88 | 0.81        | 0.85 |               |      |                                                                            |
| CV.1se | 0.11  | 0.07 | 0.11            | 0.09 | 0.03             | 0.08 | 0.85        | 0.34 | 0.10          | 0.16 | $\text{sd}(\mu)/\sigma = 2$<br>$\rho = 0.5$<br>$\bar{s}_{Oracle} = 10.0$   |
| CV.min | 0.69  | 0.26 | 0.57            | 0.24 | 0.16             | 0.16 | 0.93        | 0.44 | 0.39          | 0.29 |                                                                            |
| AICc   | 0.66  | 0.24 | 0.22            | 0.15 | 0.61             | 0.35 | 0.84        | 0.29 |               |      |                                                                            |
| AIC    | 0.95  | 0.57 | 0.94            | 0.57 | 0.94             | 0.48 | 0.94        | 0.48 |               |      |                                                                            |
| BIC    | 0.95  | 0.57 | 0.94            | 0.56 | 0.94             | 0.48 | 0.83        | 0.42 |               |      |                                                                            |
| CV.1se | 0.12  | 0.10 | 0.09            | 0.10 | 0.04             | 0.11 | 0.64        | 0.24 | 0.04          | 0.12 | $\text{sd}(\mu)/\sigma = 2$<br>$\rho = 0.9$<br>$\bar{s}_{Oracle} = 10.0$   |
| CV.min | 0.71  | 0.15 | 0.61            | 0.14 | 0.23             | 0.13 | 0.86        | 0.42 | 0.32          | 0.15 |                                                                            |
| AICc   | 0.72  | 0.14 | 0.21            | 0.11 | 0.02             | 0.10 | 0.82        | 0.31 |               |      |                                                                            |
| AIC    | 0.97  | 0.28 | 0.97            | 0.26 | 0.97             | 0.23 | 0.90        | 0.56 |               |      |                                                                            |
| BIC    | 0.93  | 0.27 | 0.95            | 0.26 | 0.97             | 0.23 | 0.34        | 0.13 |               |      |                                                                            |
| CV.1se | 0.11  | 0.10 | 0.07            | 0.07 | 0.02             | 0.04 | 0.84        | 0.55 | 0.11          | 0.09 | $\text{sd}(\mu)/\sigma = 1$<br>$\rho = 0$<br>$\bar{s}_{Oracle} = 10.0$     |
| CV.min | 0.61  | 0.38 | 0.39            | 0.25 | 0.12             | 0.10 | 0.91        | 0.61 | 0.51          | 0.34 |                                                                            |
| AICc   | 0.60  | 0.36 | 0.14            | 0.14 | 0.92             | 0.41 | 0.77        | 0.47 |               |      |                                                                            |
| AIC    | 0.94  | 0.66 | 0.94            | 0.57 | 0.94             | 0.42 | 0.93        | 0.63 |               |      |                                                                            |
| BIC    | 0.94  | 0.65 | 0.94            | 0.57 | 0.94             | 0.42 | 0.92        | 0.63 |               |      |                                                                            |
| CV.1se | 0.05  | 0.02 | 0.05            | 0.02 | 0.02             | 0.02 | 0.89        | 0.24 | 0.15          | 0.04 | $\text{sd}(\mu)/\sigma = 1$<br>$\rho = 0.5$<br>$\bar{s}_{Oracle} = 10.0$   |
| CV.min | 0.54  | 0.12 | 0.40            | 0.09 | 0.15             | 0.05 | 0.95        | 0.31 | 0.46          | 0.11 |                                                                            |
| AICc   | 0.63  | 0.13 | 0.13            | 0.05 | 0.91             | 0.22 | 0.88        | 0.19 |               |      |                                                                            |
| AIC    | 0.96  | 0.39 | 0.97            | 0.34 | 0.97             | 0.26 | 0.96        | 0.35 |               |      |                                                                            |
| BIC    | 0.96  | 0.38 | 0.97            | 0.34 | 0.97             | 0.25 | 0.94        | 0.34 |               |      |                                                                            |
| CV.1se | 0.07  | 0.06 | 0.07            | 0.07 | 0.03             | 0.08 | 0.51        | 0.12 | 0.04          | 0.08 | $\text{sd}(\mu)/\sigma = 1$<br>$\rho = 0.9$<br>$\bar{s}_{Oracle} = 10.0$   |
| CV.min | 0.66  | 0.12 | 0.56            | 0.11 | 0.20             | 0.10 | 0.89        | 0.20 | 0.28          | 0.11 |                                                                            |
| AICc   | 0.68  | 0.12 | 0.16            | 0.10 | 0.03             | 0.09 | 0.84        | 0.14 |               |      |                                                                            |
| AIC    | 0.98  | 0.24 | 0.98            | 0.22 | 0.98             | 0.18 | 0.95        | 0.41 |               |      |                                                                            |
| BIC    | 0.97  | 0.24 | 0.98            | 0.22 | 0.98             | 0.18 | 0.38        | 0.12 |               |      |                                                                            |
| CV.1se | 0.04  | 0.01 | 0.02            | 0.00 | 0.01             | 0.00 | 0.93        | 0.25 | 0.27          | 0.01 | $\text{sd}(\mu)/\sigma = 0.5$<br>$\rho = 0$<br>$\bar{s}_{Oracle} = 10.0$   |
| CV.min | 0.43  | 0.07 | 0.24            | 0.03 | 0.12             | 0.01 | 0.96        | 0.31 | 0.58          | 0.07 |                                                                            |
| AICc   | 0.54  | 0.08 | 0.19            | 0.03 | 0.97             | 0.15 | 0.90        | 0.17 |               |      |                                                                            |
| AIC    | 0.97  | 0.36 | 0.97            | 0.27 | 0.98             | 0.17 | 0.96        | 0.33 |               |      |                                                                            |
| BIC    | 0.97  | 0.35 | 0.97            | 0.26 | 0.98             | 0.17 | 0.96        | 0.33 |               |      |                                                                            |
| CV.1se | 0.03  | 0.00 | 0.03            | 0.00 | 0.01             | 0.00 | 0.93        | 0.13 | 0.29          | 0.01 | $\text{sd}(\mu)/\sigma = 0.5$<br>$\rho = 0.5$<br>$\bar{s}_{Oracle} = 10.0$ |
| CV.min | 0.43  | 0.03 | 0.29            | 0.02 | 0.14             | 0.01 | 0.97        | 0.18 | 0.60          | 0.03 |                                                                            |
| AICc   | 0.57  | 0.04 | 0.08            | 0.01 | 0.98             | 0.11 | 0.93        | 0.09 |               |      |                                                                            |
| AIC    | 0.98  | 0.23 | 0.98            | 0.19 | 0.98             | 0.13 | 0.98        | 0.21 |               |      |                                                                            |
| BIC    | 0.98  | 0.23 | 0.98            | 0.18 | 0.98             | 0.13 | 0.98        | 0.21 |               |      |                                                                            |
| CV.1se | 0.03  | 0.01 | 0.03            | 0.01 | 0.01             | 0.01 | 0.58        | 0.07 | 0.18          | 0.02 | $\text{sd}(\mu)/\sigma = 0.5$<br>$\rho = 0.9$<br>$\bar{s}_{Oracle} = 10.0$ |
| CV.min | 0.48  | 0.06 | 0.39            | 0.05 | 0.16             | 0.03 | 0.93        | 0.13 | 0.51          | 0.06 |                                                                            |
| AICc   | 0.61  | 0.07 | 0.10            | 0.03 | 0.69             | 0.09 | 0.89        | 0.10 |               |      |                                                                            |
| AIC    | 0.98  | 0.21 | 0.98            | 0.18 | 0.98             | 0.14 | 0.97        | 0.25 |               |      |                                                                            |
| BIC    | 0.98  | 0.21 | 0.98            | 0.18 | 0.98             | 0.14 | 0.67        | 0.13 |               |      |                                                                            |



Table 129: **FDR | Sensitivity for n=100, continuous design, sparse covariates, and decay 50.**

|        | lasso |      | GL $\gamma = 1$ |      | GL $\gamma = 10$ |      | marginal AL |      | sparsenet MCP |      |                                                                            |
|--------|-------|------|-----------------|------|------------------|------|-------------|------|---------------|------|----------------------------------------------------------------------------|
| CV.lse | 0.41  | 0.65 | 0.23            | 0.61 | 0.05             | 0.26 | 0.73        | 0.91 | 0.28          | 0.71 | $\text{sd}(\mu)/\sigma = 2$<br>$\rho = 0$<br>$\bar{s}_{Oracle} = 10.0$     |
| CV.min | 0.78  | 0.93 | 0.59            | 0.90 | 0.17             | 0.56 | 0.84        | 0.94 | 0.61          | 0.91 |                                                                            |
| AICc   | 0.63  | 0.87 | 0.33            | 0.83 | 0.76             | 0.89 | 0.68        | 0.88 |               |      |                                                                            |
| AIC    | 0.91  | 0.97 | 0.90            | 0.97 | 0.87             | 0.90 | 0.89        | 0.95 |               |      |                                                                            |
| BIC    | 0.91  | 0.97 | 0.90            | 0.97 | 0.87             | 0.90 | 0.86        | 0.94 |               |      |                                                                            |
| CV.lse | 0.07  | 0.04 | 0.06            | 0.04 | 0.02             | 0.03 | 0.86        | 0.39 | 0.15          | 0.07 | $\text{sd}(\mu)/\sigma = 2$<br>$\rho = 0.5$<br>$\bar{s}_{Oracle} = 10.0$   |
| CV.min | 0.60  | 0.23 | 0.44            | 0.17 | 0.15             | 0.08 | 0.93        | 0.49 | 0.49          | 0.22 |                                                                            |
| AICc   | 0.63  | 0.22 | 0.14            | 0.09 | 0.91             | 0.36 | 0.83        | 0.32 |               |      |                                                                            |
| AIC    | 0.95  | 0.60 | 0.94            | 0.56 | 0.95             | 0.40 | 0.94        | 0.53 |               |      |                                                                            |
| BIC    | 0.95  | 0.60 | 0.94            | 0.55 | 0.95             | 0.40 | 0.93        | 0.52 |               |      |                                                                            |
| CV.lse | 0.26  | 0.10 | 0.23            | 0.11 | 0.13             | 0.12 | 0.69        | 0.19 | 0.12          | 0.14 | $\text{sd}(\mu)/\sigma = 2$<br>$\rho = 0.9$<br>$\bar{s}_{Oracle} = 10.0$   |
| CV.min | 0.78  | 0.20 | 0.73            | 0.17 | 0.33             | 0.15 | 0.90        | 0.26 | 0.34          | 0.18 |                                                                            |
| AICc   | 0.77  | 0.19 | 0.32            | 0.14 | 0.18             | 0.14 | 0.84        | 0.21 |               |      |                                                                            |
| AIC    | 0.97  | 0.32 | 0.97            | 0.29 | 0.97             | 0.23 | 0.95        | 0.43 |               |      |                                                                            |
| BIC    | 0.97  | 0.32 | 0.97            | 0.29 | 0.97             | 0.23 | 0.61        | 0.19 |               |      |                                                                            |
| CV.lse | 0.10  | 0.07 | 0.05            | 0.04 | 0.01             | 0.02 | 0.84        | 0.58 | 0.15          | 0.07 | $\text{sd}(\mu)/\sigma = 1$<br>$\rho = 0$<br>$\bar{s}_{Oracle} = 10.0$     |
| CV.min | 0.58  | 0.37 | 0.29            | 0.17 | 0.11             | 0.06 | 0.91        | 0.66 | 0.54          | 0.34 |                                                                            |
| AICc   | 0.57  | 0.33 | 0.16            | 0.12 | 0.93             | 0.38 | 0.77        | 0.49 |               |      |                                                                            |
| AIC    | 0.94  | 0.69 | 0.94            | 0.57 | 0.95             | 0.39 | 0.93        | 0.67 |               |      |                                                                            |
| BIC    | 0.94  | 0.69 | 0.94            | 0.57 | 0.94             | 0.39 | 0.92        | 0.67 |               |      |                                                                            |
| CV.lse | 0.04  | 0.01 | 0.03            | 0.01 | 0.02             | 0.01 | 0.91        | 0.26 | 0.19          | 0.02 | $\text{sd}(\mu)/\sigma = 1$<br>$\rho = 0.5$<br>$\bar{s}_{Oracle} = 10.0$   |
| CV.min | 0.48  | 0.10 | 0.32            | 0.06 | 0.13             | 0.02 | 0.95        | 0.34 | 0.55          | 0.09 |                                                                            |
| AICc   | 0.57  | 0.10 | 0.12            | 0.03 | 0.96             | 0.19 | 0.88        | 0.20 |               |      |                                                                            |
| AIC    | 0.96  | 0.40 | 0.97            | 0.34 | 0.97             | 0.22 | 0.96        | 0.37 |               |      |                                                                            |
| BIC    | 0.96  | 0.40 | 0.97            | 0.34 | 0.97             | 0.22 | 0.96        | 0.37 |               |      |                                                                            |
| CV.lse | 0.09  | 0.03 | 0.09            | 0.03 | 0.05             | 0.03 | 0.68        | 0.13 | 0.17          | 0.05 | $\text{sd}(\mu)/\sigma = 1$<br>$\rho = 0.9$<br>$\bar{s}_{Oracle} = 10.0$   |
| CV.min | 0.60  | 0.12 | 0.54            | 0.10 | 0.24             | 0.07 | 0.92        | 0.20 | 0.50          | 0.11 |                                                                            |
| AICc   | 0.68  | 0.12 | 0.16            | 0.05 | 0.46             | 0.10 | 0.88        | 0.16 |               |      |                                                                            |
| AIC    | 0.98  | 0.28 | 0.98            | 0.24 | 0.98             | 0.19 | 0.96        | 0.32 |               |      |                                                                            |
| BIC    | 0.97  | 0.28 | 0.98            | 0.24 | 0.97             | 0.19 | 0.68        | 0.17 |               |      |                                                                            |
| CV.lse | 0.03  | 0.01 | 0.02            | 0.00 | 0.02             | 0.00 | 0.93        | 0.25 | 0.25          | 0.01 | $\text{sd}(\mu)/\sigma = 0.5$<br>$\rho = 0$<br>$\bar{s}_{Oracle} = 10.0$   |
| CV.min | 0.42  | 0.07 | 0.21            | 0.02 | 0.11             | 0.01 | 0.96        | 0.32 | 0.55          | 0.06 |                                                                            |
| AICc   | 0.55  | 0.07 | 0.51            | 0.09 | 0.97             | 0.14 | 0.90        | 0.17 |               |      |                                                                            |
| AIC    | 0.97  | 0.36 | 0.97            | 0.25 | 0.98             | 0.16 | 0.96        | 0.34 |               |      |                                                                            |
| BIC    | 0.97  | 0.36 | 0.97            | 0.25 | 0.98             | 0.15 | 0.96        | 0.34 |               |      |                                                                            |
| CV.lse | 0.02  | 0.00 | 0.02            | 0.00 | 0.01             | 0.00 | 0.93        | 0.13 | 0.28          | 0.01 | $\text{sd}(\mu)/\sigma = 0.5$<br>$\rho = 0.5$<br>$\bar{s}_{Oracle} = 10.0$ |
| CV.min | 0.44  | 0.03 | 0.26            | 0.01 | 0.13             | 0.00 | 0.97        | 0.19 | 0.59          | 0.03 |                                                                            |
| AICc   | 0.56  | 0.03 | 0.12            | 0.01 | 0.98             | 0.10 | 0.93        | 0.08 |               |      |                                                                            |
| AIC    | 0.98  | 0.24 | 0.98            | 0.18 | 0.98             | 0.12 | 0.98        | 0.21 |               |      |                                                                            |
| BIC    | 0.98  | 0.23 | 0.98            | 0.18 | 0.98             | 0.12 | 0.98        | 0.21 |               |      |                                                                            |
| CV.lse | 0.03  | 0.00 | 0.02            | 0.00 | 0.02             | 0.00 | 0.62        | 0.05 | 0.30          | 0.01 | $\text{sd}(\mu)/\sigma = 0.5$<br>$\rho = 0.9$<br>$\bar{s}_{Oracle} = 10.0$ |
| CV.min | 0.45  | 0.03 | 0.33            | 0.02 | 0.15             | 0.01 | 0.94        | 0.11 | 0.61          | 0.03 |                                                                            |
| AICc   | 0.60  | 0.04 | 0.08            | 0.00 | 0.95             | 0.11 | 0.91        | 0.08 |               |      |                                                                            |
| AIC    | 0.98  | 0.21 | 0.98            | 0.17 | 0.98             | 0.13 | 0.98        | 0.20 |               |      |                                                                            |
| BIC    | 0.98  | 0.21 | 0.98            | 0.17 | 0.98             | 0.13 | 0.84        | 0.13 |               |      |                                                                            |

Table 130: **FDR | Sensitivity for n=100, continuous design, sparse covariates, and decay 100.**

|        | lasso |      | GL $\gamma = 1$ |      | GL $\gamma = 10$ |      | marginal AL |      | sparsenet MCP |      |                                                                            |
|--------|-------|------|-----------------|------|------------------|------|-------------|------|---------------|------|----------------------------------------------------------------------------|
| CV.lse | 0.41  | 0.66 | 0.22            | 0.61 | 0.04             | 0.25 | 0.73        | 0.91 | 0.29          | 0.72 | $\text{sd}(\mu)/\sigma = 2$<br>$\rho = 0$<br>$\bar{s}_{Oracle} = 10.0$     |
| CV.min | 0.78  | 0.94 | 0.58            | 0.89 | 0.17             | 0.52 | 0.84        | 0.94 | 0.62          | 0.91 |                                                                            |
| AICc   | 0.63  | 0.87 | 0.33            | 0.84 | 0.78             | 0.89 | 0.69        | 0.89 |               |      |                                                                            |
| AIC    | 0.91  | 0.97 | 0.90            | 0.97 | 0.87             | 0.90 | 0.89        | 0.95 |               |      |                                                                            |
| BIC    | 0.91  | 0.97 | 0.90            | 0.97 | 0.87             | 0.90 | 0.86        | 0.95 |               |      |                                                                            |
| CV.lse | 0.07  | 0.04 | 0.06            | 0.04 | 0.02             | 0.02 | 0.86        | 0.39 | 0.16          | 0.06 | $\text{sd}(\mu)/\sigma = 2$<br>$\rho = 0.5$<br>$\bar{s}_{Oracle} = 10.0$   |
| CV.min | 0.59  | 0.23 | 0.43            | 0.17 | 0.14             | 0.07 | 0.93        | 0.50 | 0.50          | 0.22 |                                                                            |
| AICc   | 0.62  | 0.22 | 0.14            | 0.09 | 0.91             | 0.36 | 0.83        | 0.33 |               |      |                                                                            |
| AIC    | 0.95  | 0.60 | 0.94            | 0.55 | 0.95             | 0.39 | 0.94        | 0.54 |               |      |                                                                            |
| BIC    | 0.95  | 0.60 | 0.94            | 0.55 | 0.95             | 0.39 | 0.93        | 0.52 |               |      |                                                                            |
| CV.lse | 0.27  | 0.10 | 0.24            | 0.11 | 0.13             | 0.11 | 0.69        | 0.19 | 0.14          | 0.14 | $\text{sd}(\mu)/\sigma = 2$<br>$\rho = 0.9$<br>$\bar{s}_{Oracle} = 10.0$   |
| CV.min | 0.79  | 0.20 | 0.73            | 0.17 | 0.33             | 0.15 | 0.89        | 0.26 | 0.37          | 0.18 |                                                                            |
| AICc   | 0.77  | 0.20 | 0.33            | 0.14 | 0.20             | 0.15 | 0.84        | 0.22 |               |      |                                                                            |
| AIC    | 0.97  | 0.32 | 0.97            | 0.29 | 0.97             | 0.23 | 0.95        | 0.42 |               |      |                                                                            |
| BIC    | 0.97  | 0.32 | 0.97            | 0.29 | 0.97             | 0.23 | 0.64        | 0.20 |               |      |                                                                            |
| CV.lse | 0.10  | 0.07 | 0.04            | 0.04 | 0.02             | 0.02 | 0.84        | 0.59 | 0.14          | 0.07 | $\text{sd}(\mu)/\sigma = 1$<br>$\rho = 0$<br>$\bar{s}_{Oracle} = 10.0$     |
| CV.min | 0.58  | 0.37 | 0.28            | 0.16 | 0.10             | 0.06 | 0.91        | 0.66 | 0.54          | 0.34 |                                                                            |
| AICc   | 0.57  | 0.33 | 0.18            | 0.12 | 0.93             | 0.37 | 0.77        | 0.49 |               |      |                                                                            |
| AIC    | 0.94  | 0.70 | 0.94            | 0.56 | 0.95             | 0.39 | 0.93        | 0.67 |               |      |                                                                            |
| BIC    | 0.94  | 0.69 | 0.94            | 0.56 | 0.94             | 0.39 | 0.93        | 0.67 |               |      |                                                                            |
| CV.lse | 0.04  | 0.01 | 0.03            | 0.01 | 0.02             | 0.01 | 0.91        | 0.26 | 0.25          | 0.02 | $\text{sd}(\mu)/\sigma = 1$<br>$\rho = 0.5$<br>$\bar{s}_{Oracle} = 10.0$   |
| CV.min | 0.47  | 0.09 | 0.30            | 0.05 | 0.13             | 0.02 | 0.95        | 0.34 | 0.56          | 0.09 |                                                                            |
| AICc   | 0.57  | 0.10 | 0.11            | 0.02 | 0.96             | 0.19 | 0.88        | 0.20 |               |      |                                                                            |
| AIC    | 0.96  | 0.40 | 0.97            | 0.34 | 0.97             | 0.21 | 0.96        | 0.37 |               |      |                                                                            |
| BIC    | 0.96  | 0.40 | 0.97            | 0.33 | 0.97             | 0.21 | 0.96        | 0.37 |               |      |                                                                            |
| CV.lse | 0.09  | 0.02 | 0.10            | 0.02 | 0.05             | 0.03 | 0.70        | 0.13 | 0.22          | 0.05 | $\text{sd}(\mu)/\sigma = 1$<br>$\rho = 0.9$<br>$\bar{s}_{Oracle} = 10.0$   |
| CV.min | 0.59  | 0.11 | 0.53            | 0.09 | 0.25             | 0.06 | 0.92        | 0.20 | 0.54          | 0.11 |                                                                            |
| AICc   | 0.68  | 0.12 | 0.17            | 0.04 | 0.56             | 0.12 | 0.88        | 0.16 |               |      |                                                                            |
| AIC    | 0.97  | 0.28 | 0.98            | 0.24 | 0.98             | 0.19 | 0.96        | 0.31 |               |      |                                                                            |
| BIC    | 0.97  | 0.28 | 0.98            | 0.24 | 0.98             | 0.19 | 0.69        | 0.18 |               |      |                                                                            |
| CV.lse | 0.03  | 0.01 | 0.02            | 0.00 | 0.02             | 0.00 | 0.93        | 0.25 | 0.26          | 0.01 | $\text{sd}(\mu)/\sigma = 0.5$<br>$\rho = 0$<br>$\bar{s}_{Oracle} = 10.0$   |
| CV.min | 0.42  | 0.06 | 0.21            | 0.02 | 0.10             | 0.01 | 0.96        | 0.32 | 0.57          | 0.06 |                                                                            |
| AICc   | 0.56  | 0.07 | 0.56            | 0.10 | 0.97             | 0.14 | 0.90        | 0.17 |               |      |                                                                            |
| AIC    | 0.97  | 0.36 | 0.97            | 0.25 | 0.98             | 0.16 | 0.96        | 0.34 |               |      |                                                                            |
| BIC    | 0.97  | 0.36 | 0.97            | 0.24 | 0.98             | 0.15 | 0.96        | 0.34 |               |      |                                                                            |
| CV.lse | 0.02  | 0.00 | 0.02            | 0.00 | 0.01             | 0.00 | 0.93        | 0.12 | 0.30          | 0.00 | $\text{sd}(\mu)/\sigma = 0.5$<br>$\rho = 0.5$<br>$\bar{s}_{Oracle} = 10.0$ |
| CV.min | 0.43  | 0.03 | 0.25            | 0.01 | 0.13             | 0.00 | 0.97        | 0.18 | 0.61          | 0.03 |                                                                            |
| AICc   | 0.56  | 0.03 | 0.15            | 0.01 | 0.98             | 0.10 | 0.93        | 0.08 |               |      |                                                                            |
| AIC    | 0.98  | 0.23 | 0.98            | 0.18 | 0.98             | 0.12 | 0.98        | 0.21 |               |      |                                                                            |
| BIC    | 0.98  | 0.23 | 0.98            | 0.18 | 0.98             | 0.11 | 0.98        | 0.21 |               |      |                                                                            |
| CV.lse | 0.02  | 0.00 | 0.02            | 0.00 | 0.02             | 0.00 | 0.62        | 0.05 | 0.28          | 0.01 | $\text{sd}(\mu)/\sigma = 0.5$<br>$\rho = 0.9$<br>$\bar{s}_{Oracle} = 10.0$ |
| CV.min | 0.45  | 0.03 | 0.33            | 0.02 | 0.14             | 0.01 | 0.94        | 0.11 | 0.59          | 0.03 |                                                                            |
| AICc   | 0.60  | 0.03 | 0.07            | 0.00 | 0.97             | 0.11 | 0.91        | 0.07 |               |      |                                                                            |
| AIC    | 0.98  | 0.21 | 0.98            | 0.17 | 0.98             | 0.13 | 0.98        | 0.20 |               |      |                                                                            |
| BIC    | 0.98  | 0.21 | 0.98            | 0.17 | 0.98             | 0.13 | 0.83        | 0.13 |               |      |                                                                            |

Table 131: **FDR | Sensitivity for n=100, continuous design, sparse covariates, and decay 200.**

|        | lasso |      | GL $\gamma = 1$ |      | GL $\gamma = 10$ |      | marginal AL |      | sparsenet MCP |      |                                                                            |
|--------|-------|------|-----------------|------|------------------|------|-------------|------|---------------|------|----------------------------------------------------------------------------|
| CV.lse | 0.41  | 0.65 | 0.21            | 0.61 | 0.04             | 0.25 | 0.73        | 0.91 | 0.29          | 0.72 | $\text{sd}(\mu)/\sigma = 2$<br>$\rho = 0$<br>$\bar{s}_{Oracle} = 10.0$     |
| CV.min | 0.79  | 0.94 | 0.58            | 0.90 | 0.16             | 0.54 | 0.84        | 0.95 | 0.61          | 0.91 |                                                                            |
| AICc   | 0.63  | 0.87 | 0.32            | 0.84 | 0.79             | 0.90 | 0.69        | 0.89 |               |      |                                                                            |
| AIC    | 0.91  | 0.98 | 0.90            | 0.97 | 0.87             | 0.91 | 0.89        | 0.95 |               |      |                                                                            |
| BIC    | 0.91  | 0.97 | 0.89            | 0.97 | 0.87             | 0.91 | 0.86        | 0.95 |               |      |                                                                            |
| CV.lse | 0.07  | 0.04 | 0.06            | 0.04 | 0.02             | 0.03 | 0.86        | 0.39 | 0.16          | 0.06 | $\text{sd}(\mu)/\sigma = 2$<br>$\rho = 0.5$<br>$\bar{s}_{Oracle} = 10.0$   |
| CV.min | 0.59  | 0.23 | 0.42            | 0.16 | 0.14             | 0.07 | 0.93        | 0.50 | 0.49          | 0.21 |                                                                            |
| AICc   | 0.62  | 0.22 | 0.14            | 0.09 | 0.91             | 0.35 | 0.83        | 0.33 |               |      |                                                                            |
| AIC    | 0.95  | 0.60 | 0.94            | 0.55 | 0.95             | 0.38 | 0.94        | 0.54 |               |      |                                                                            |
| BIC    | 0.95  | 0.60 | 0.94            | 0.54 | 0.95             | 0.38 | 0.92        | 0.52 |               |      |                                                                            |
| CV.lse | 0.28  | 0.10 | 0.24            | 0.11 | 0.13             | 0.11 | 0.69        | 0.20 | 0.14          | 0.14 | $\text{sd}(\mu)/\sigma = 2$<br>$\rho = 0.9$<br>$\bar{s}_{Oracle} = 10.0$   |
| CV.min | 0.79  | 0.20 | 0.72            | 0.17 | 0.33             | 0.15 | 0.89        | 0.26 | 0.37          | 0.18 |                                                                            |
| AICc   | 0.77  | 0.20 | 0.34            | 0.14 | 0.23             | 0.15 | 0.84        | 0.22 |               |      |                                                                            |
| AIC    | 0.97  | 0.32 | 0.97            | 0.29 | 0.97             | 0.23 | 0.95        | 0.41 |               |      |                                                                            |
| BIC    | 0.97  | 0.32 | 0.97            | 0.29 | 0.97             | 0.23 | 0.64        | 0.21 |               |      |                                                                            |
| CV.lse | 0.10  | 0.07 | 0.04            | 0.04 | 0.01             | 0.02 | 0.84        | 0.59 | 0.15          | 0.07 | $\text{sd}(\mu)/\sigma = 1$<br>$\rho = 0$<br>$\bar{s}_{Oracle} = 10.0$     |
| CV.min | 0.58  | 0.38 | 0.28            | 0.16 | 0.11             | 0.06 | 0.91        | 0.66 | 0.53          | 0.35 |                                                                            |
| AICc   | 0.56  | 0.33 | 0.19            | 0.13 | 0.93             | 0.37 | 0.77        | 0.49 |               |      |                                                                            |
| AIC    | 0.94  | 0.70 | 0.94            | 0.56 | 0.95             | 0.39 | 0.93        | 0.67 |               |      |                                                                            |
| BIC    | 0.94  | 0.70 | 0.94            | 0.56 | 0.94             | 0.38 | 0.92        | 0.67 |               |      |                                                                            |
| CV.lse | 0.04  | 0.01 | 0.03            | 0.01 | 0.02             | 0.01 | 0.90        | 0.26 | 0.23          | 0.02 | $\text{sd}(\mu)/\sigma = 1$<br>$\rho = 0.5$<br>$\bar{s}_{Oracle} = 10.0$   |
| CV.min | 0.48  | 0.10 | 0.30            | 0.05 | 0.13             | 0.02 | 0.95        | 0.34 | 0.56          | 0.09 |                                                                            |
| AICc   | 0.58  | 0.10 | 0.10            | 0.02 | 0.96             | 0.19 | 0.88        | 0.20 |               |      |                                                                            |
| AIC    | 0.96  | 0.41 | 0.97            | 0.34 | 0.97             | 0.21 | 0.96        | 0.37 |               |      |                                                                            |
| BIC    | 0.96  | 0.40 | 0.97            | 0.33 | 0.97             | 0.21 | 0.96        | 0.37 |               |      |                                                                            |
| CV.lse | 0.09  | 0.02 | 0.09            | 0.02 | 0.05             | 0.03 | 0.70        | 0.13 | 0.22          | 0.05 | $\text{sd}(\mu)/\sigma = 1$<br>$\rho = 0.9$<br>$\bar{s}_{Oracle} = 10.0$   |
| CV.min | 0.59  | 0.11 | 0.53            | 0.10 | 0.25             | 0.06 | 0.92        | 0.20 | 0.53          | 0.11 |                                                                            |
| AICc   | 0.68  | 0.12 | 0.17            | 0.04 | 0.58             | 0.12 | 0.88        | 0.17 |               |      |                                                                            |
| AIC    | 0.97  | 0.28 | 0.98            | 0.24 | 0.98             | 0.20 | 0.96        | 0.31 |               |      |                                                                            |
| BIC    | 0.97  | 0.28 | 0.98            | 0.24 | 0.97             | 0.20 | 0.72        | 0.18 |               |      |                                                                            |
| CV.lse | 0.03  | 0.01 | 0.02            | 0.00 | 0.01             | 0.00 | 0.93        | 0.25 | 0.25          | 0.01 | $\text{sd}(\mu)/\sigma = 0.5$<br>$\rho = 0$<br>$\bar{s}_{Oracle} = 10.0$   |
| CV.min | 0.42  | 0.06 | 0.20            | 0.02 | 0.10             | 0.01 | 0.96        | 0.32 | 0.56          | 0.06 |                                                                            |
| AICc   | 0.55  | 0.07 | 0.58            | 0.11 | 0.97             | 0.14 | 0.90        | 0.17 |               |      |                                                                            |
| AIC    | 0.97  | 0.36 | 0.97            | 0.24 | 0.98             | 0.15 | 0.96        | 0.34 |               |      |                                                                            |
| BIC    | 0.97  | 0.36 | 0.97            | 0.24 | 0.98             | 0.15 | 0.96        | 0.34 |               |      |                                                                            |
| CV.lse | 0.02  | 0.00 | 0.02            | 0.00 | 0.01             | 0.00 | 0.93        | 0.12 | 0.30          | 0.00 | $\text{sd}(\mu)/\sigma = 0.5$<br>$\rho = 0.5$<br>$\bar{s}_{Oracle} = 10.0$ |
| CV.min | 0.43  | 0.03 | 0.25            | 0.01 | 0.13             | 0.00 | 0.97        | 0.18 | 0.62          | 0.03 |                                                                            |
| AICc   | 0.56  | 0.03 | 0.16            | 0.01 | 0.98             | 0.10 | 0.93        | 0.08 |               |      |                                                                            |
| AIC    | 0.98  | 0.23 | 0.98            | 0.18 | 0.98             | 0.11 | 0.98        | 0.21 |               |      |                                                                            |
| BIC    | 0.98  | 0.23 | 0.98            | 0.17 | 0.98             | 0.11 | 0.98        | 0.21 |               |      |                                                                            |
| CV.lse | 0.03  | 0.00 | 0.02            | 0.00 | 0.01             | 0.00 | 0.61        | 0.05 | 0.28          | 0.01 | $\text{sd}(\mu)/\sigma = 0.5$<br>$\rho = 0.9$<br>$\bar{s}_{Oracle} = 10.0$ |
| CV.min | 0.45  | 0.03 | 0.33            | 0.02 | 0.15             | 0.01 | 0.93        | 0.10 | 0.60          | 0.03 |                                                                            |
| AICc   | 0.60  | 0.03 | 0.08            | 0.00 | 0.97             | 0.11 | 0.91        | 0.07 |               |      |                                                                            |
| AIC    | 0.98  | 0.20 | 0.98            | 0.17 | 0.98             | 0.13 | 0.98        | 0.20 |               |      |                                                                            |
| BIC    | 0.98  | 0.20 | 0.98            | 0.17 | 0.98             | 0.12 | 0.83        | 0.12 |               |      |                                                                            |
